# Supplementary material for: Benefits and harms of pregabalin in the management of neuropathic pain: a rapid review and meta-analysis of randomised clinical trials
Source: PubMed Central journal article supplement — BMJ Open. 2019 Jan 21;9(1):e023600. doi: 10.1136/bmjopen-2018-023600 (PMC6347863; doi:10.1136/bmjopen-2018-023600), 2019-01-21

**Figure S1: Funnel plot for publication bias in RCTs assessing the effect of pregabalin in neuropathic pain.** The broken line represents the mean difference for all trials.

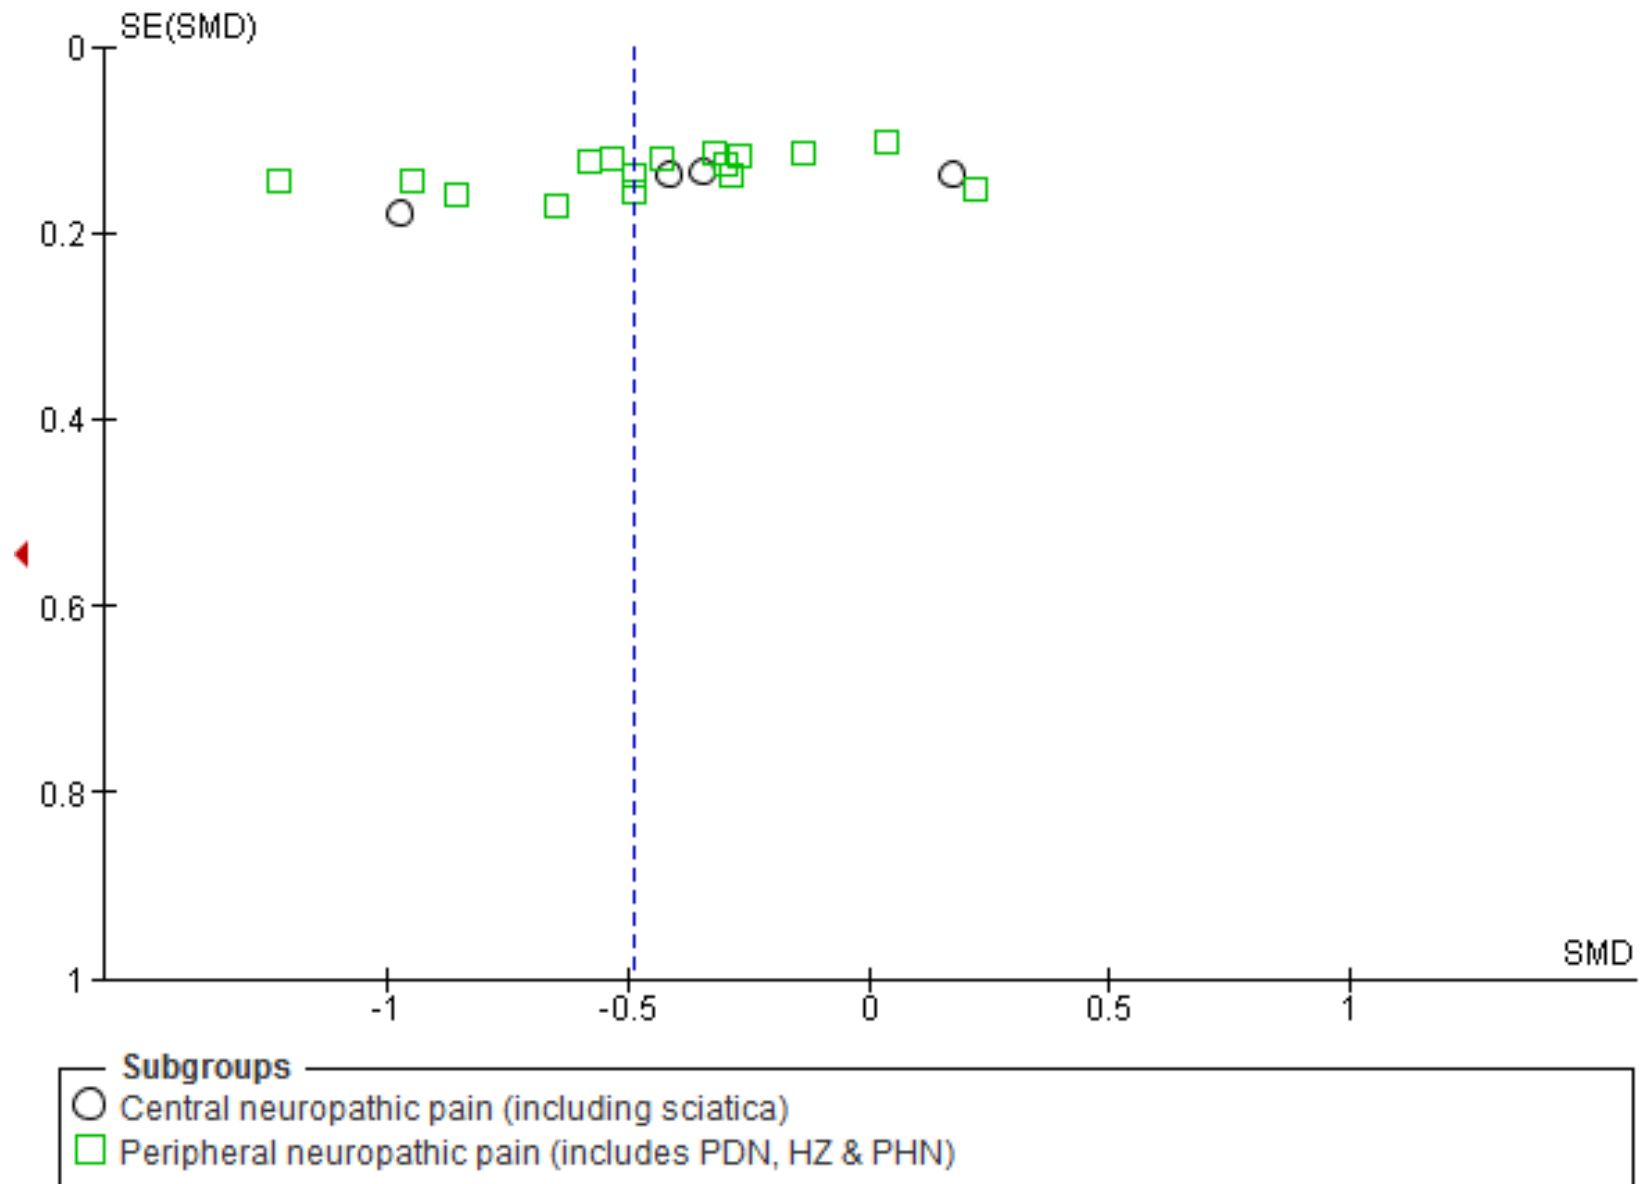

**Figure S2: Effect of pregabalin on the risk of weight gain in patients with neuropathic pain**

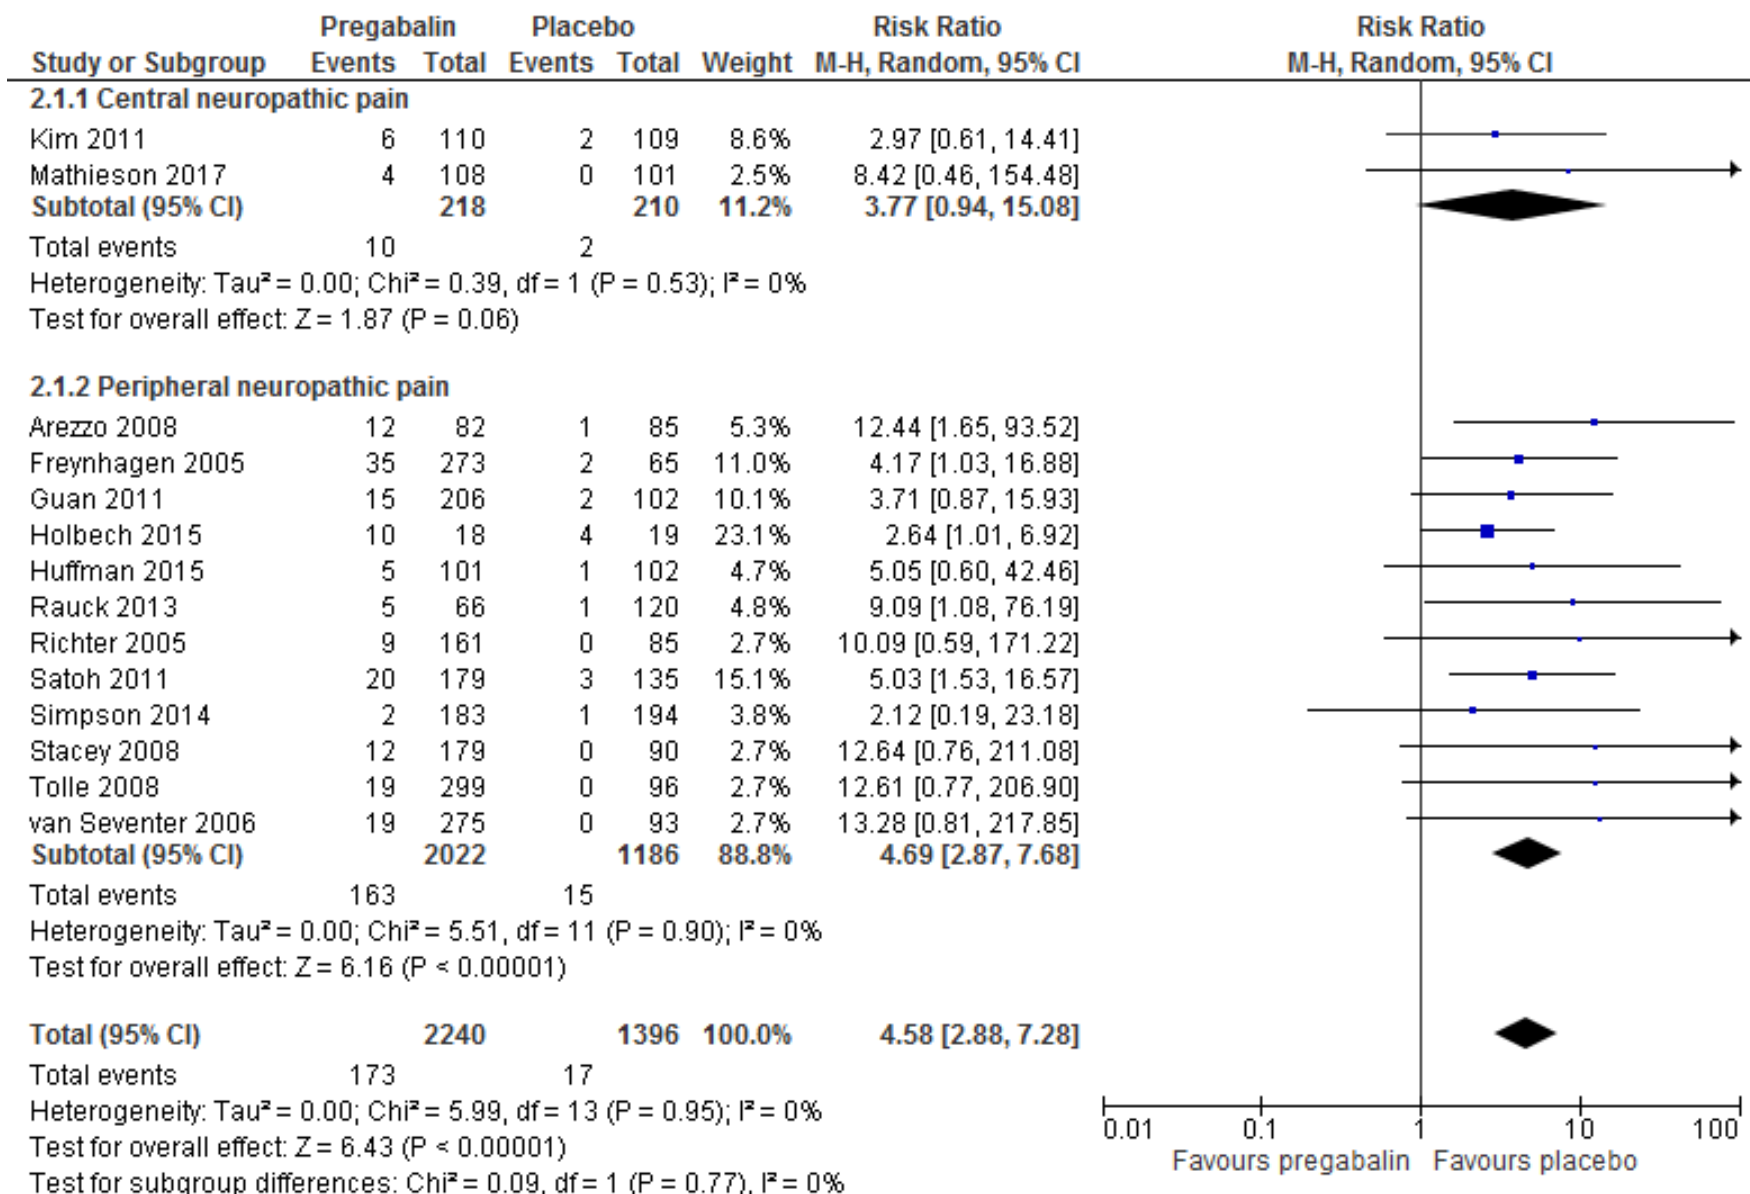

**Figure S3: Effect of pregabalin on the risk of somnolence in patients with neuropathic pain**

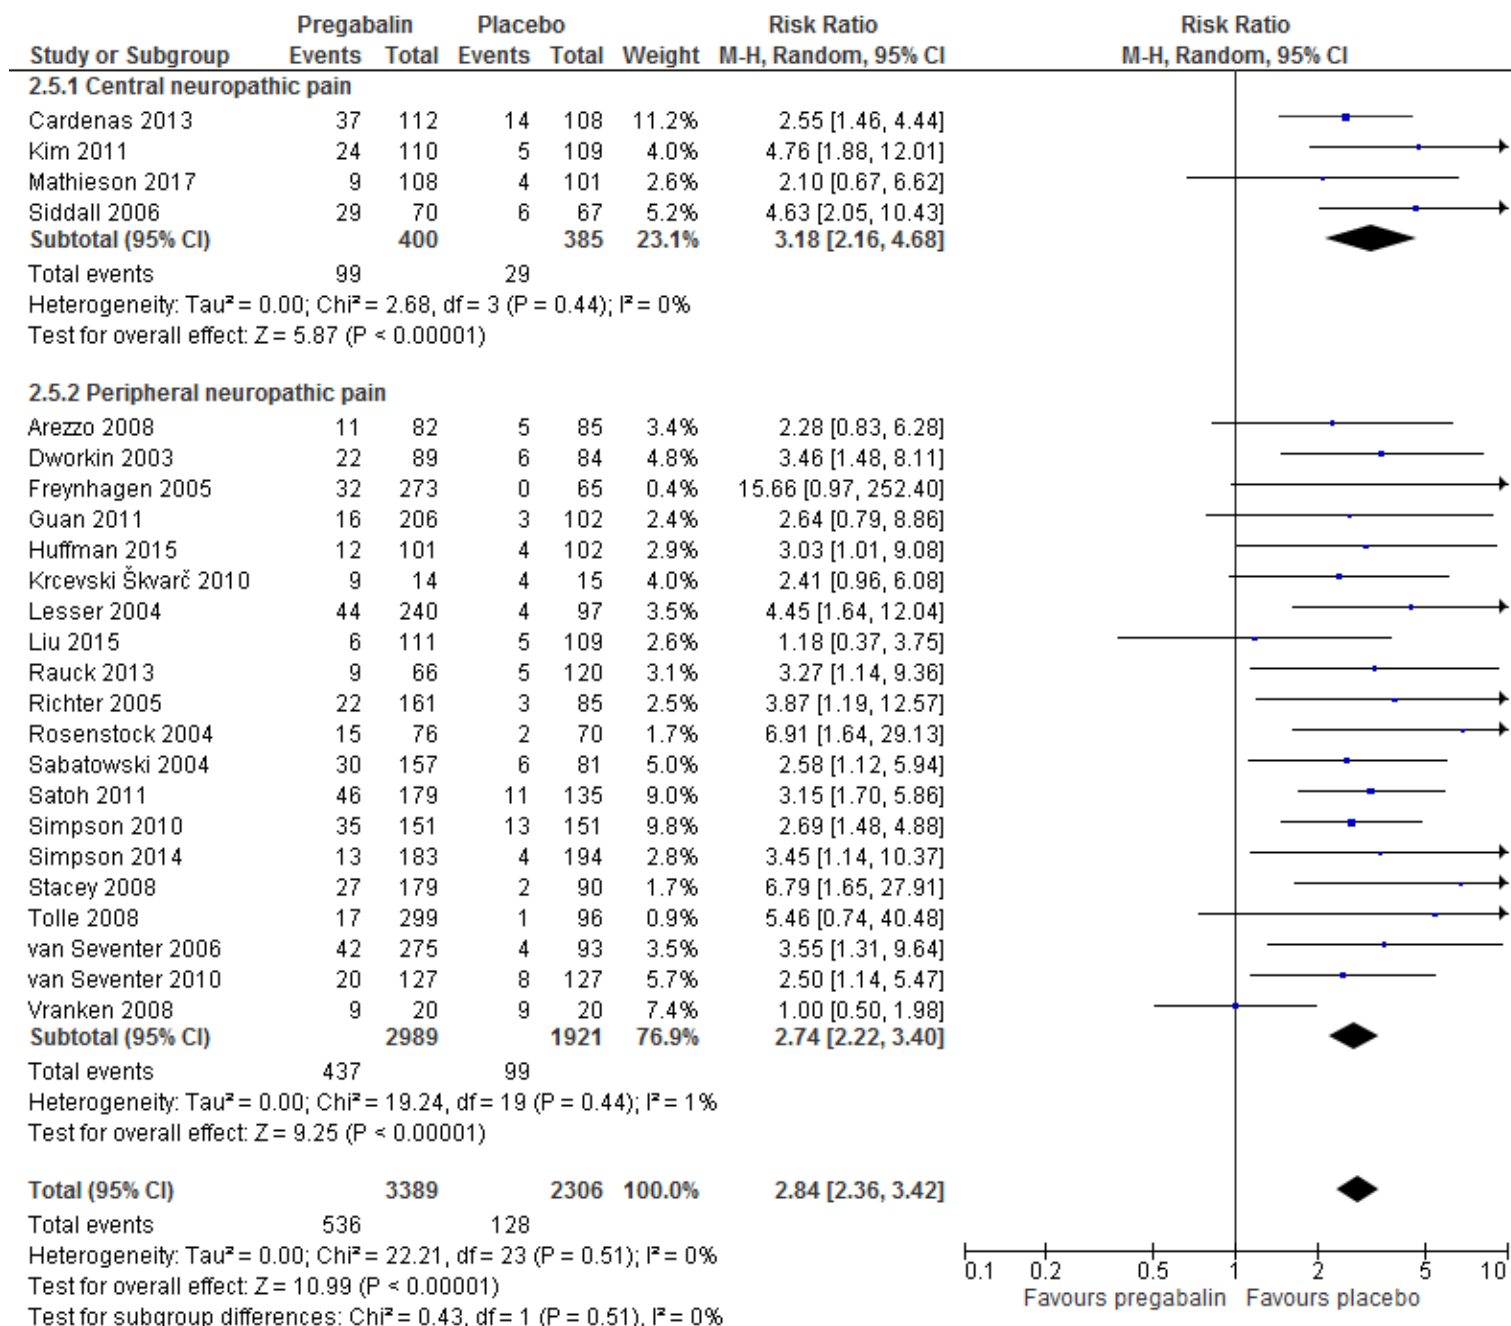

**Figure S4: Effect of pregabalin on the risk of dizziness in patients with neuropathic pain**

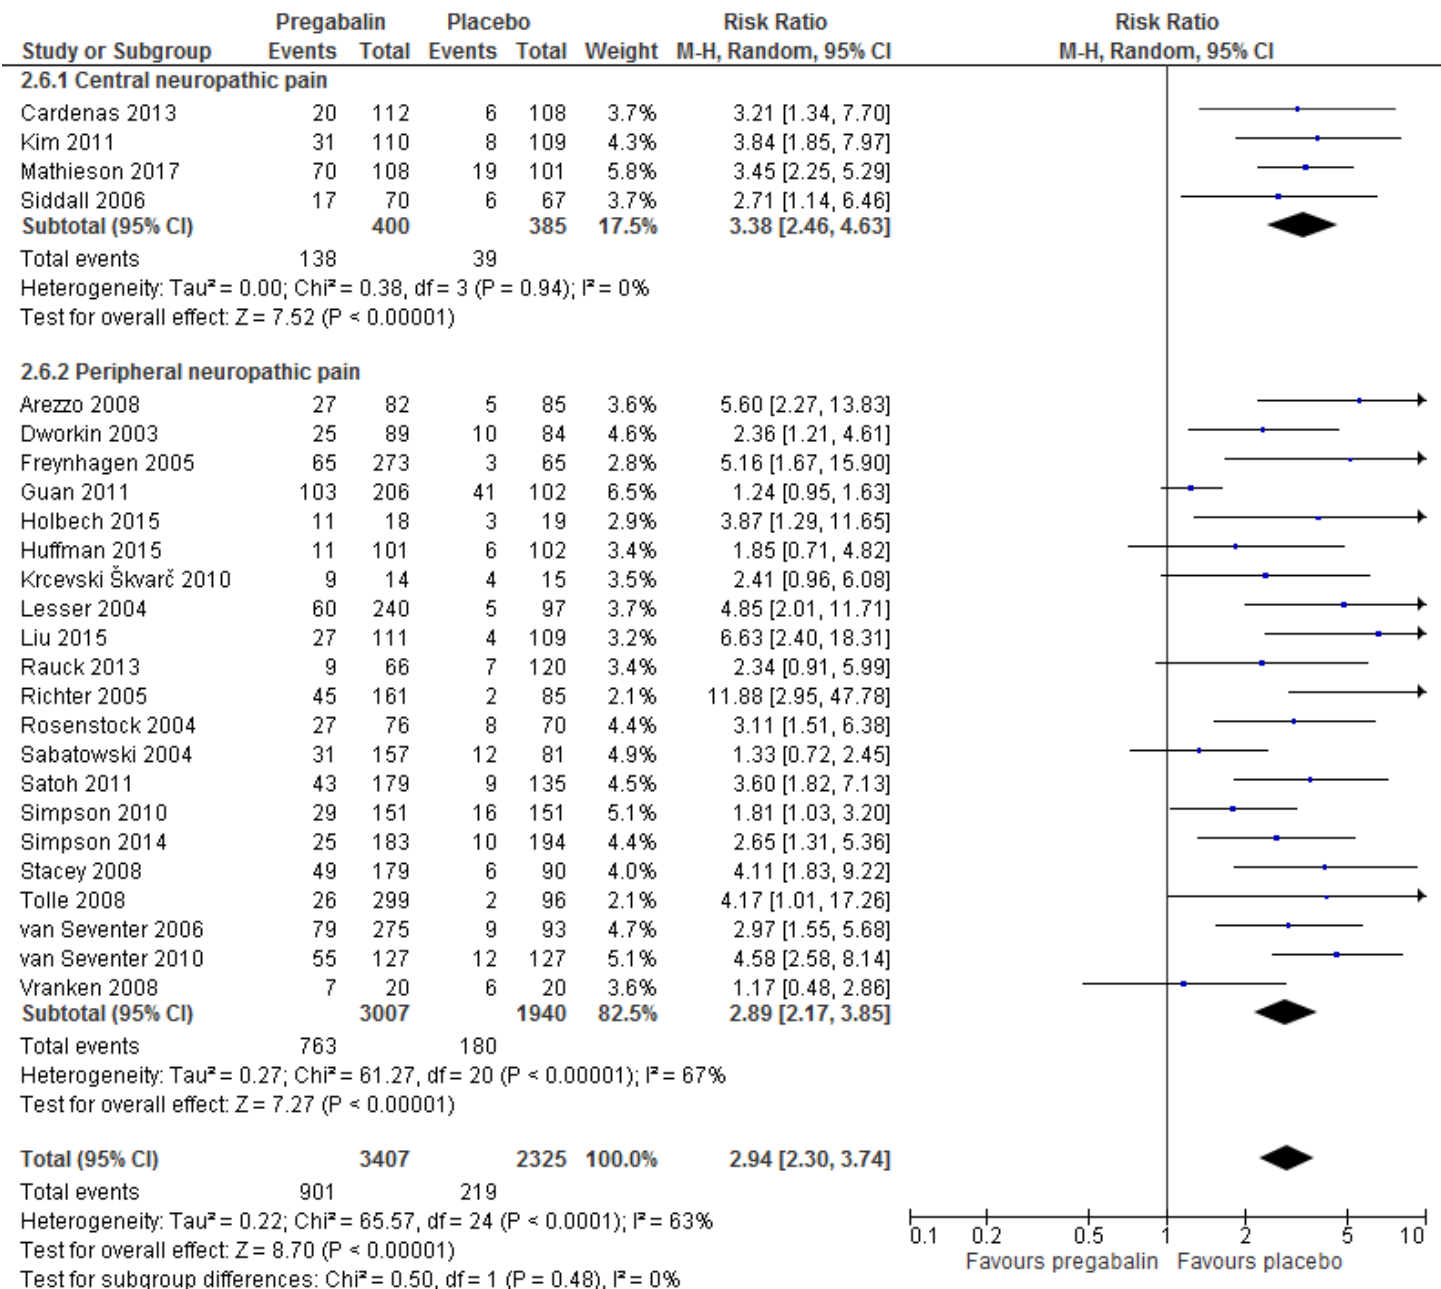

**Figure S5: Effect of pregabalin on the risk of peripheral edema in patients with neuropathic pain**

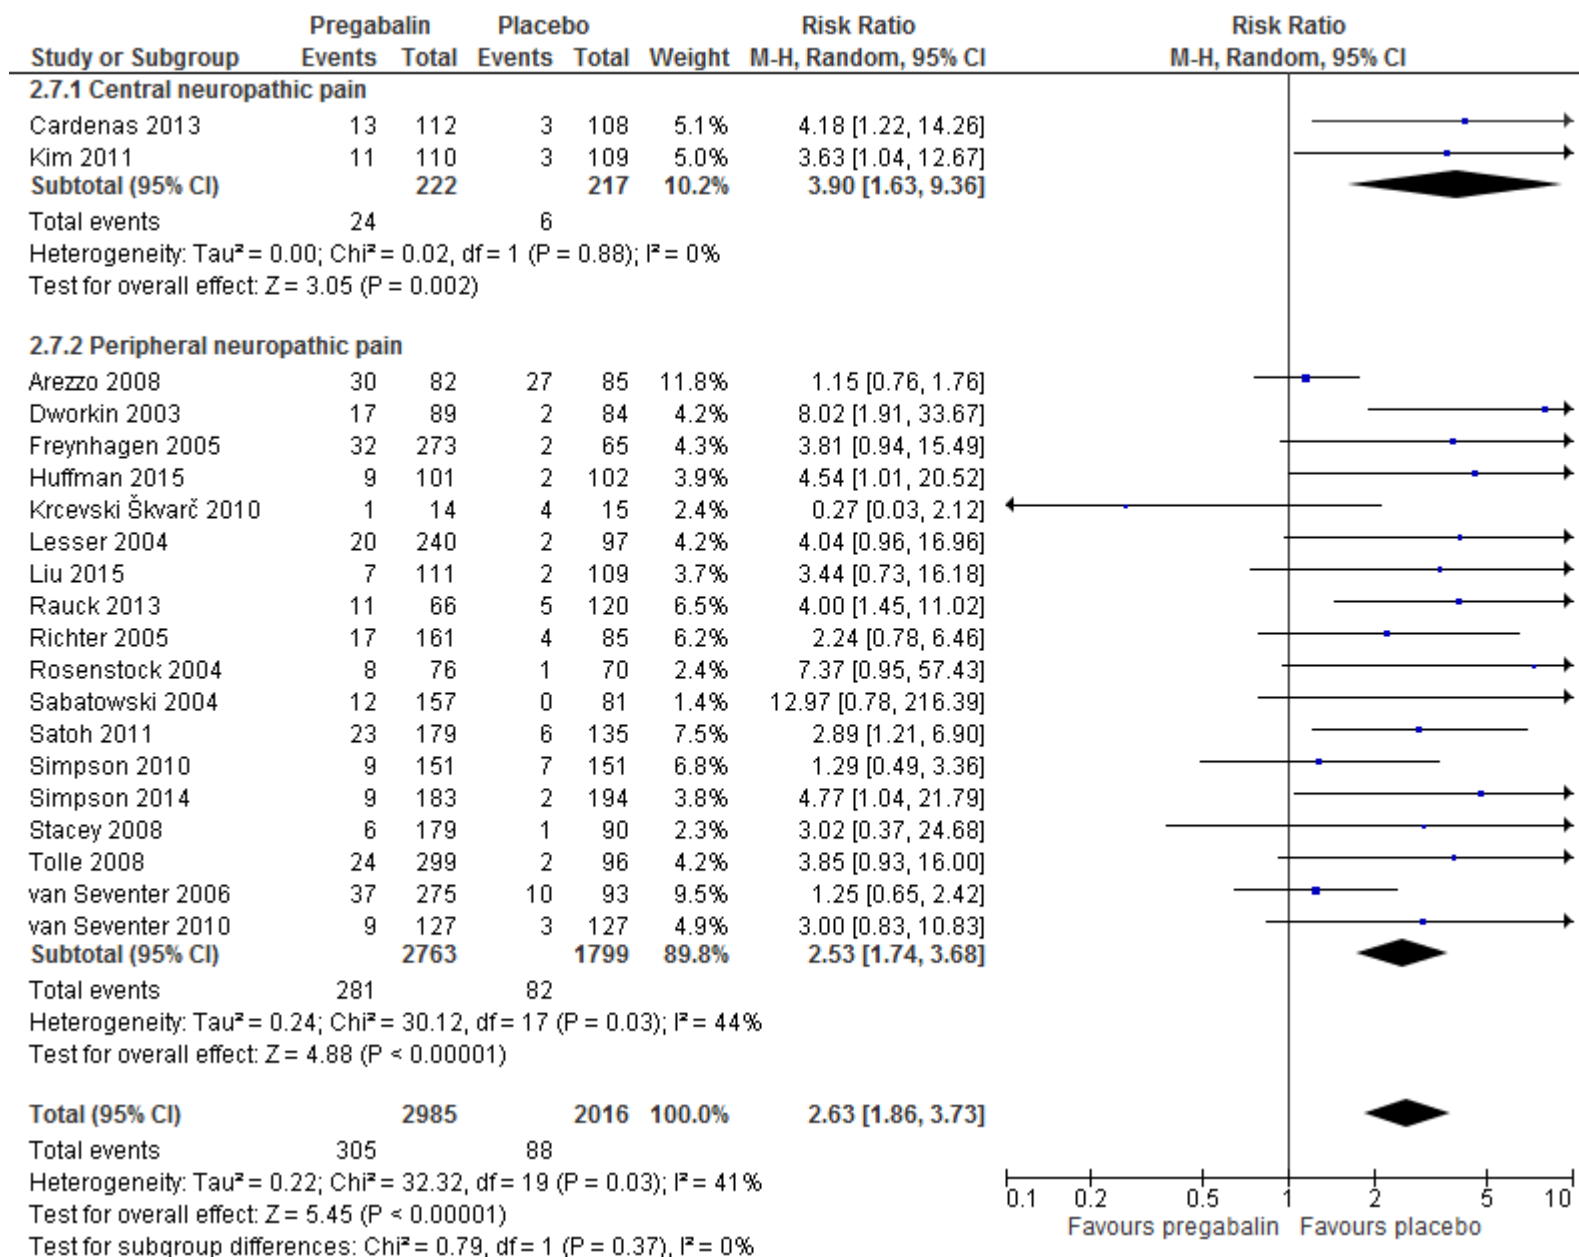

**Figure S6: Effect of pregabalin on the risk of fatigue including asthenia in patients with neuropathic pain**

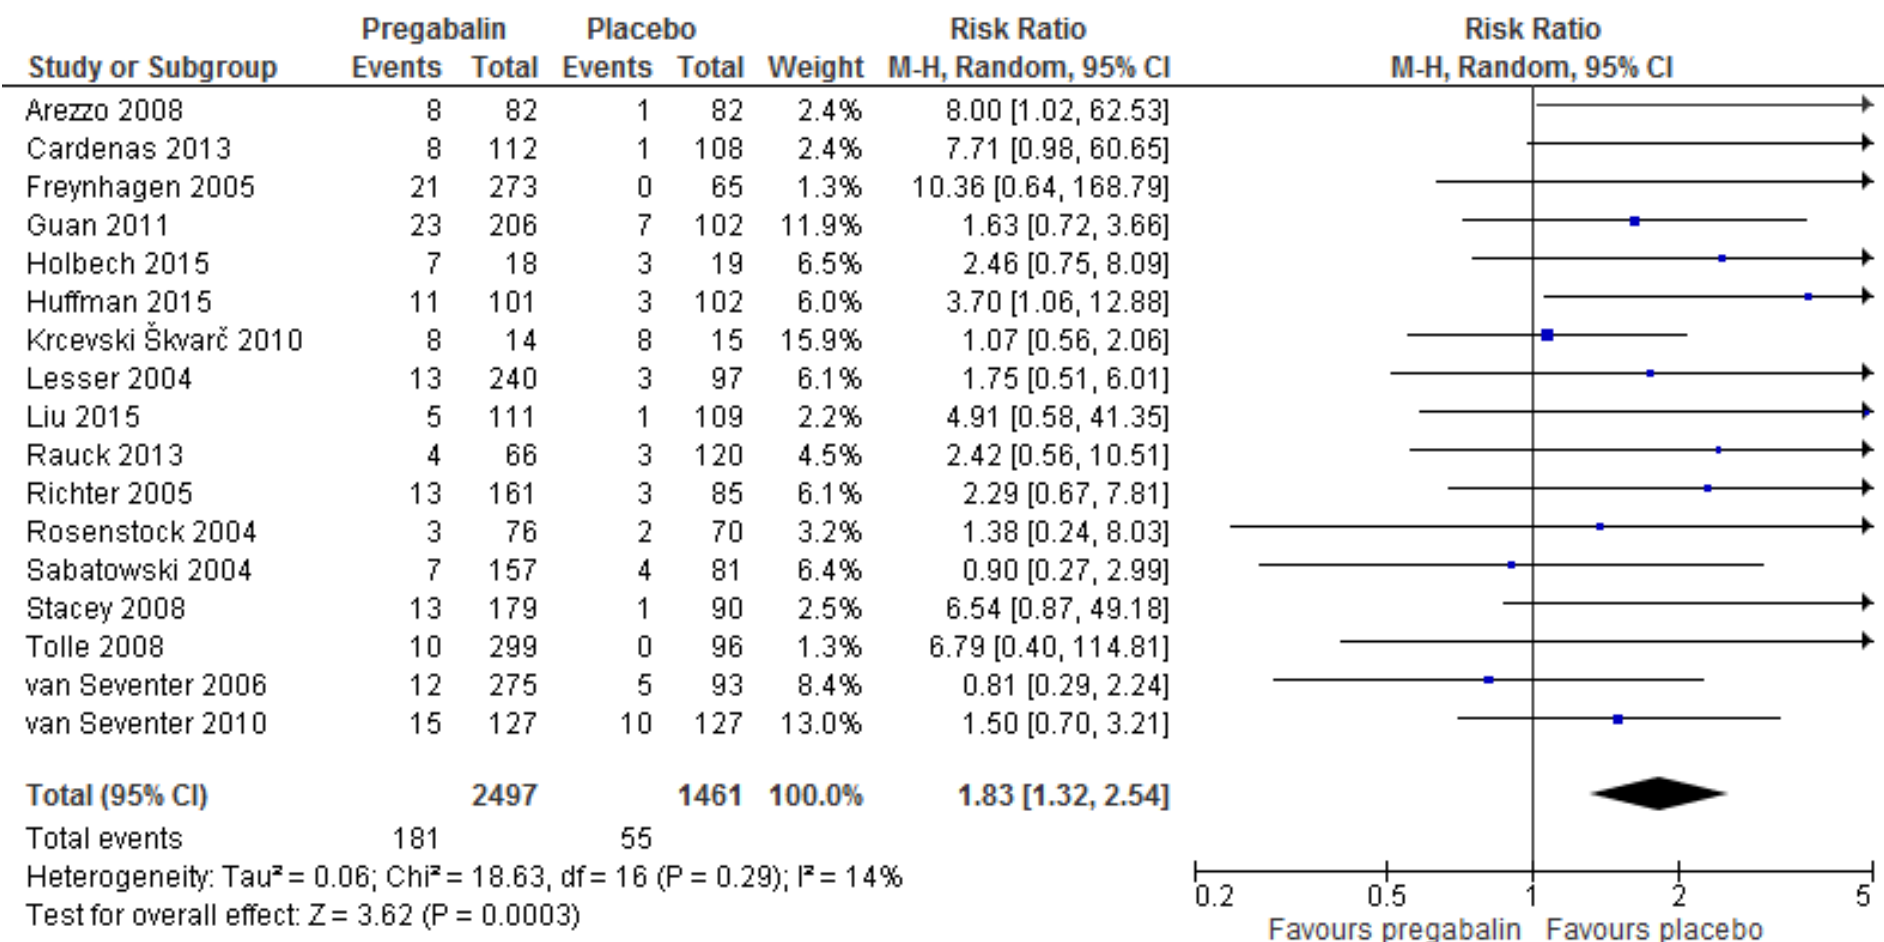

**Figure S7: Effect of pregabalin on the risk of visual disturbances\* in patients with neuropathic pain**

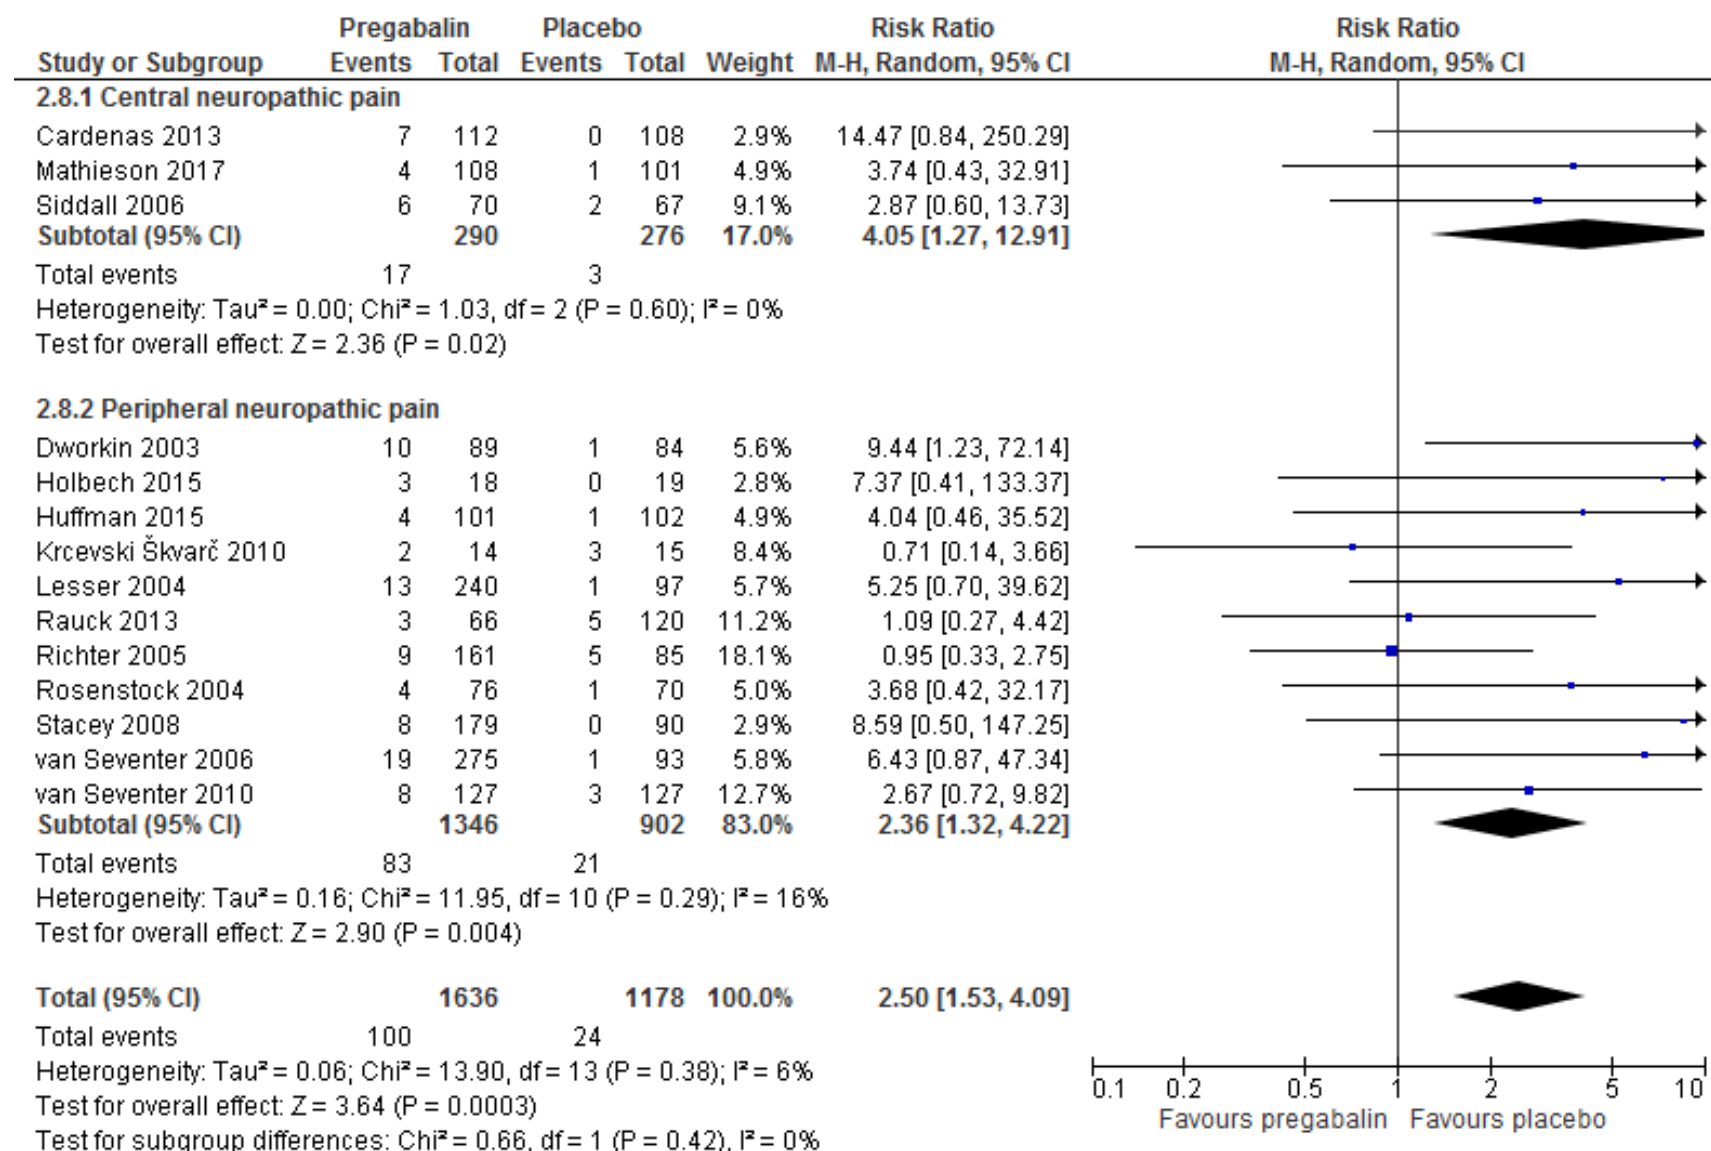

\*includes blurring of vision and amblyopia

**Figure S8: Effect of pregabalin on the risk of ataxia in patients with neuropathic pain**

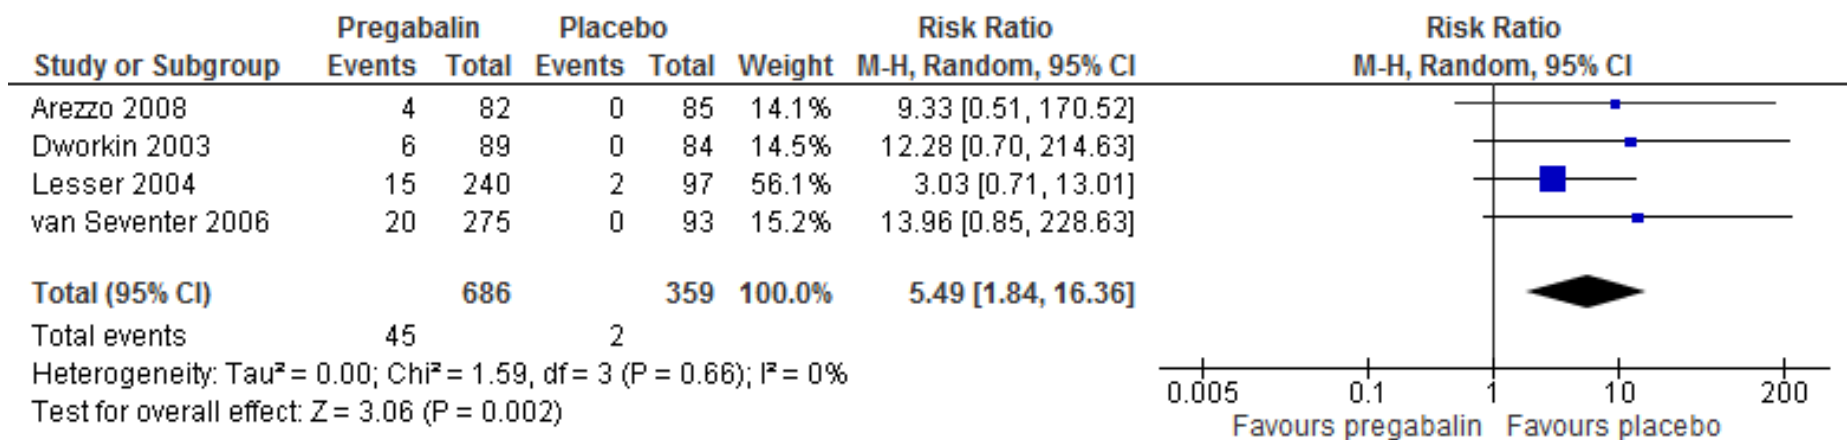



**Figure S9: Effect of pregabalin on the risk of non-peripheral edema in patients with neuropathic pain**

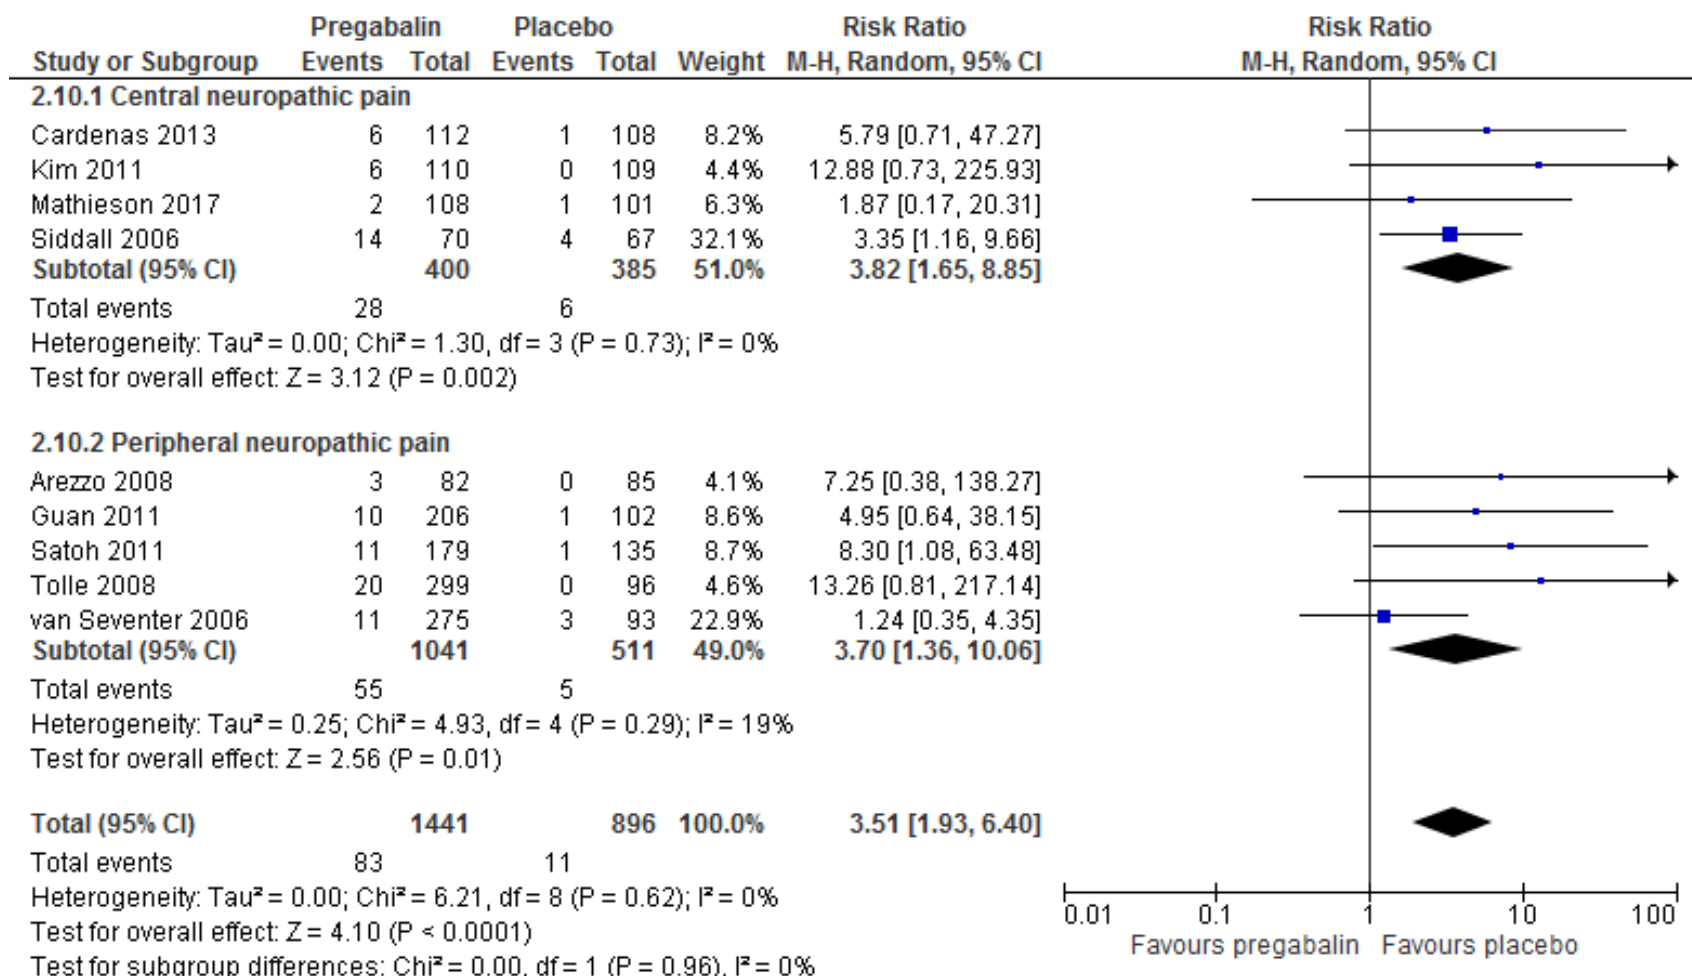

**Figure S10: Effect of pregabalin on the risk of vertigo in patients with neuropathic pain**

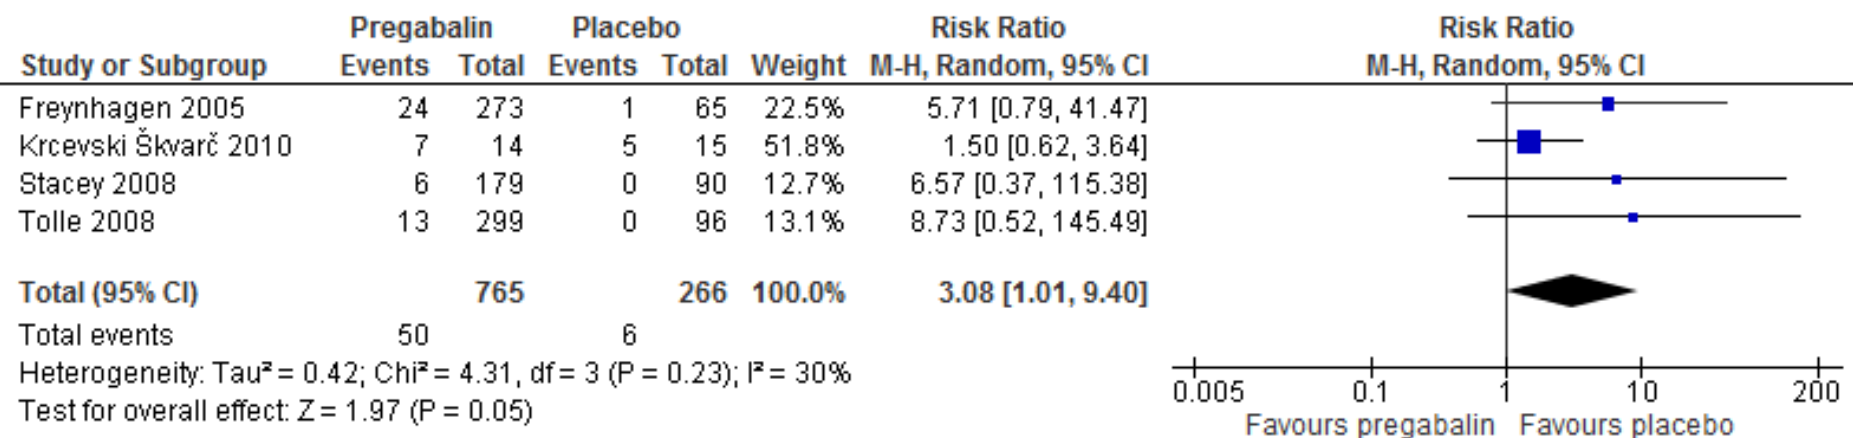

**Figure S11: Effect of pregabalin on the risk of euphoria in patients with neuropathic pain**

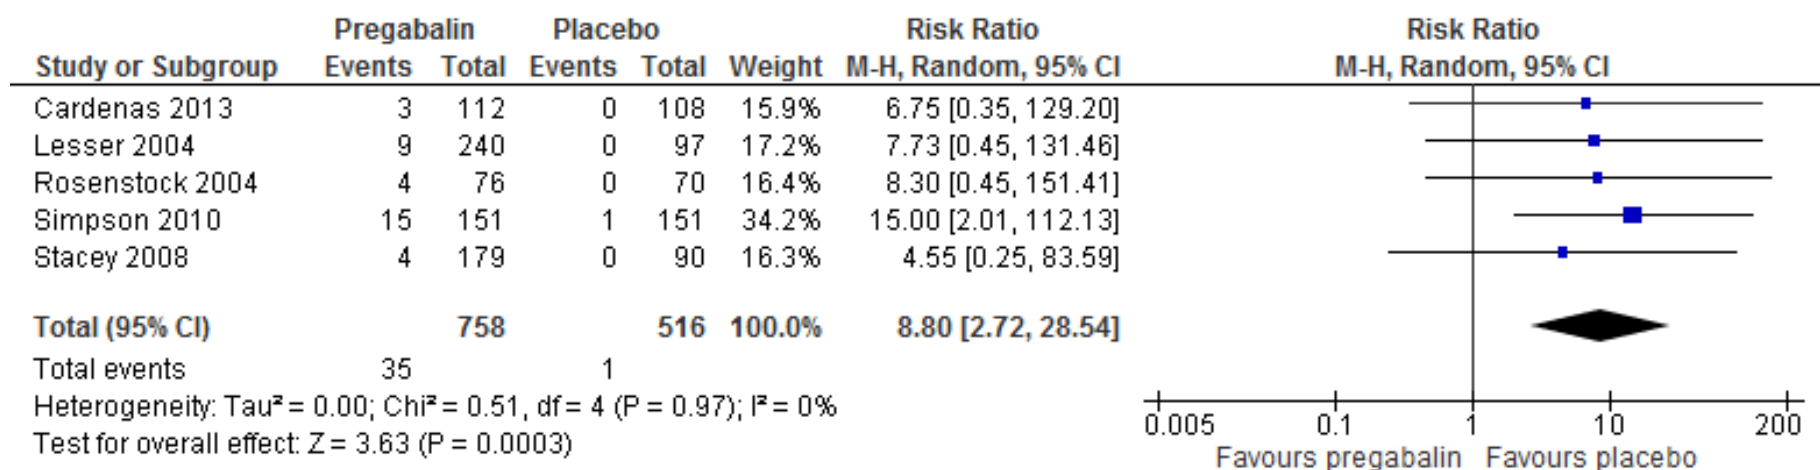

**Figure S12: Effect of pregabalin on the risk of dry mouth in patients with neuropathic pain**

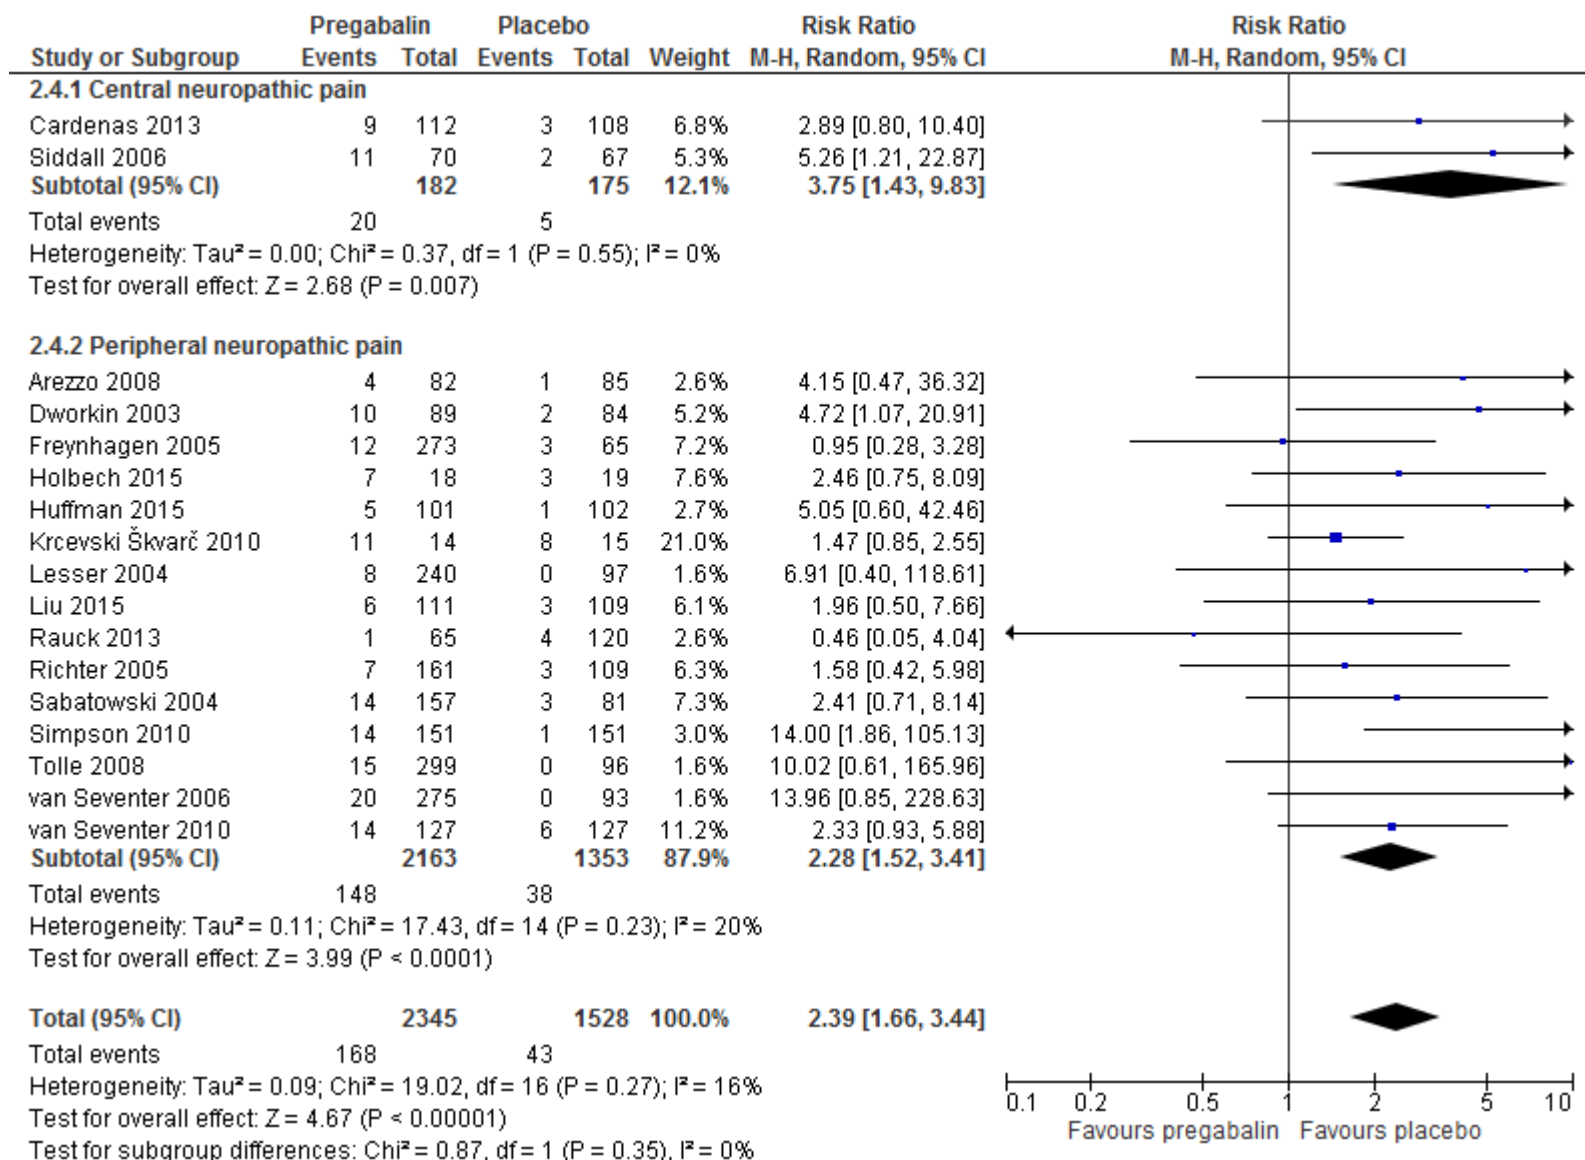

# Figure S13: Effect of pregabalin on the risk of discontinuation due to adverse events

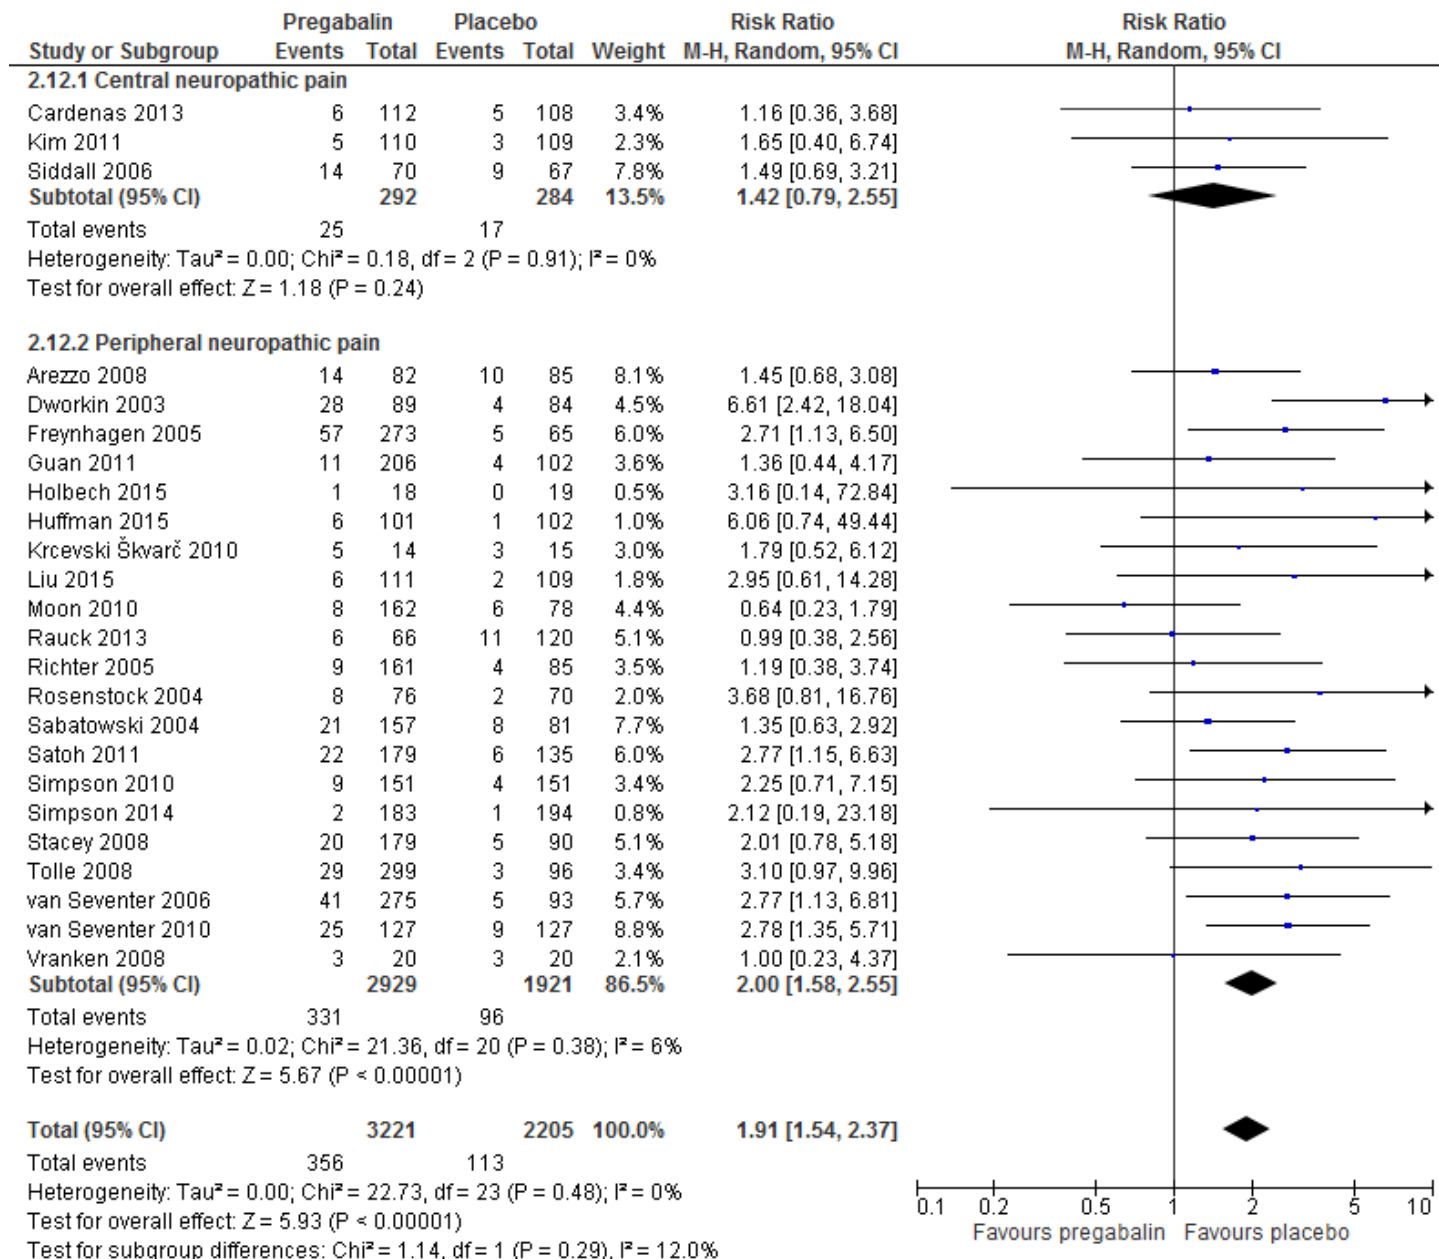

**Figure S14: Effect of pregabalin on the risk of serious adverse events in patients with neuropathic pain**

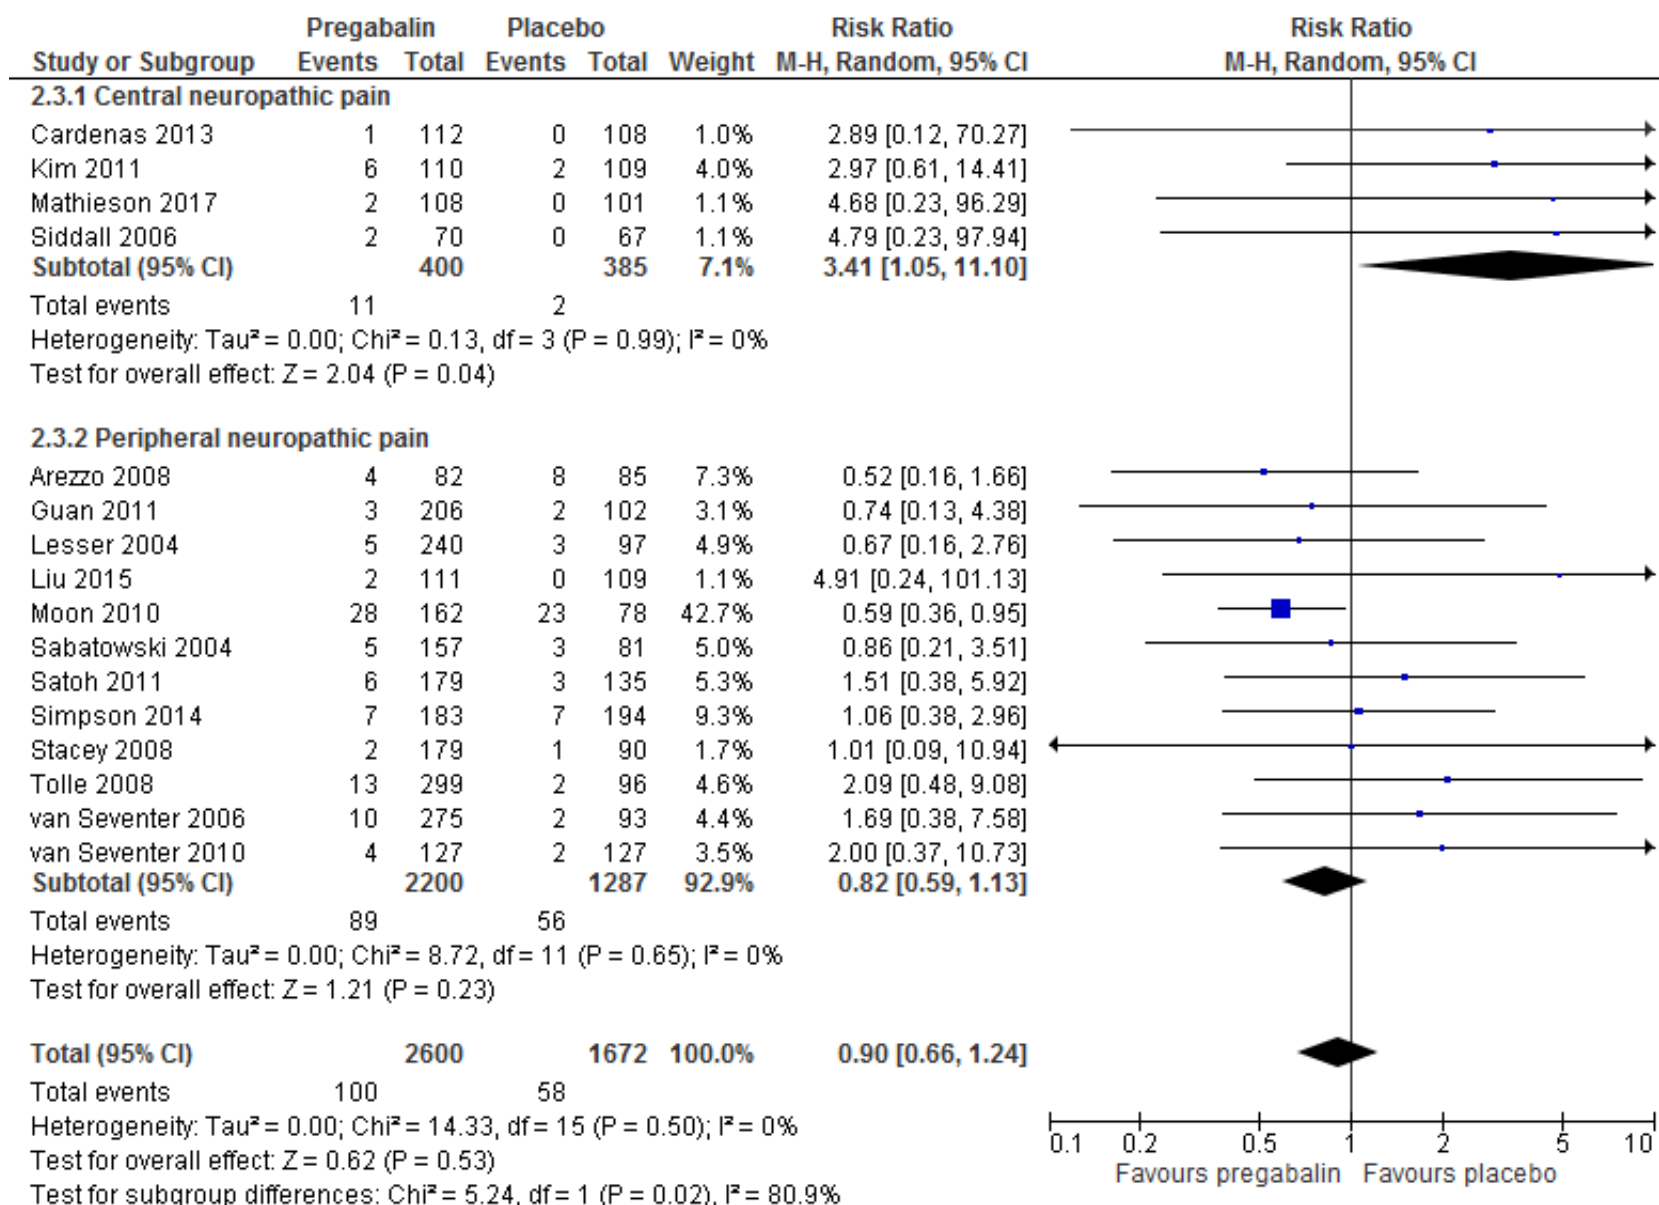

**Figure S15: Effect of pregabalin on the sleep disturbance in patients with neuropathic pain**

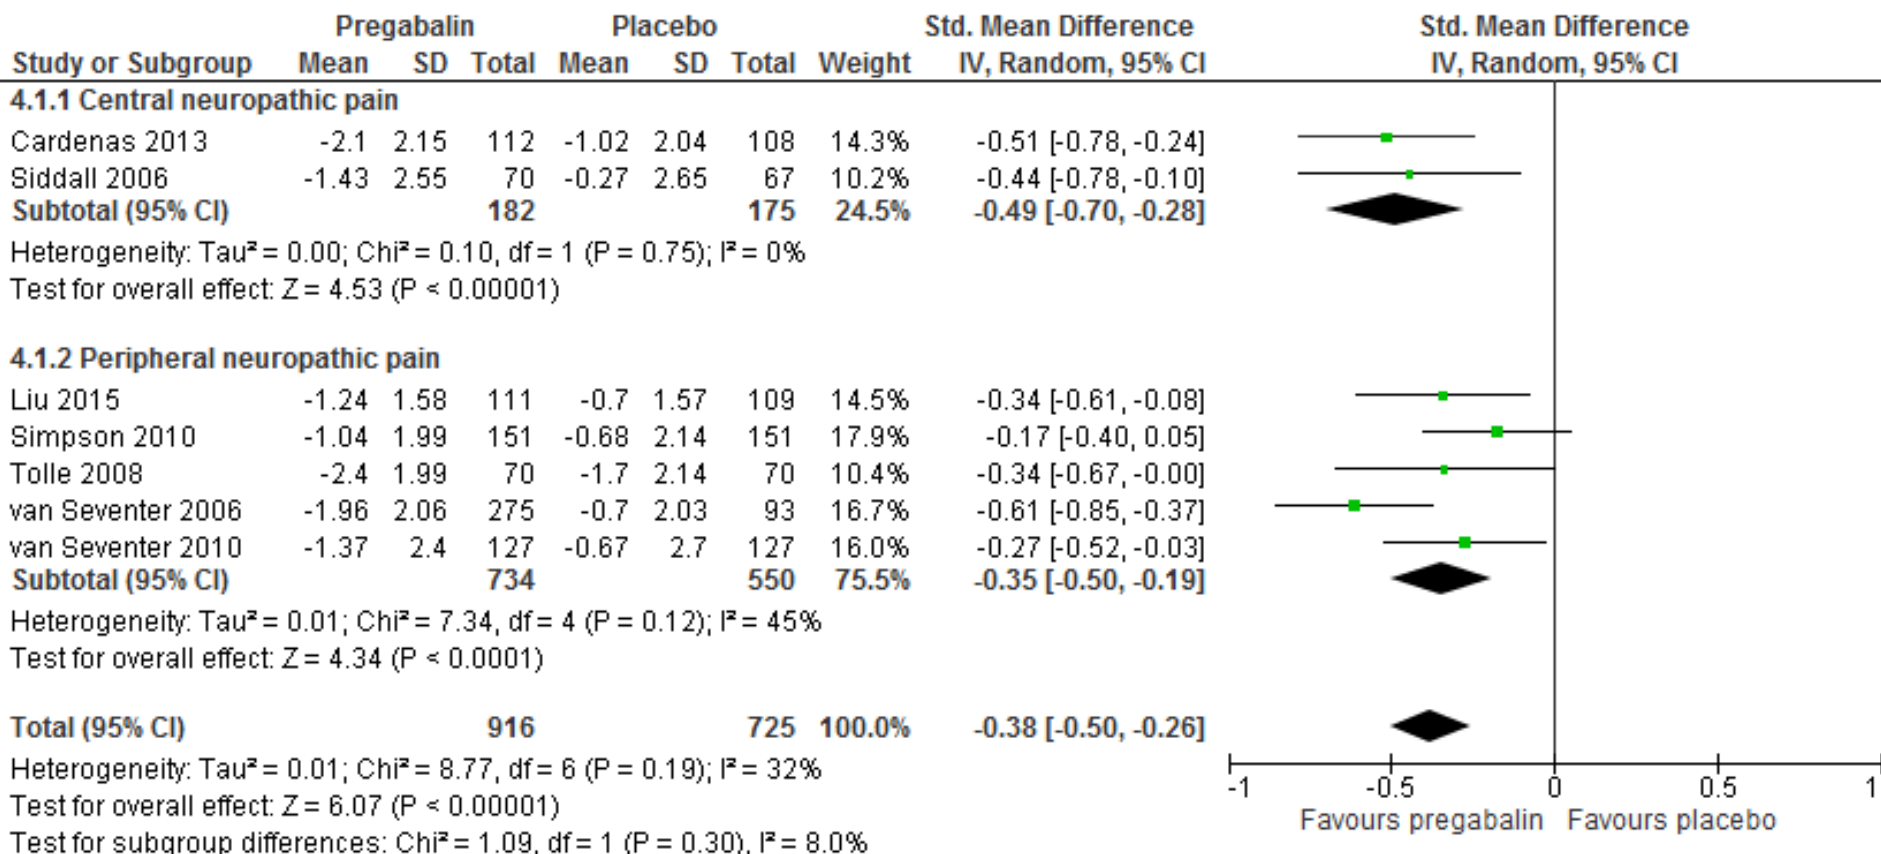

**Figure S16: Effect of pregabalin on HADS-anxiety scores in patients with neuropathic pain**

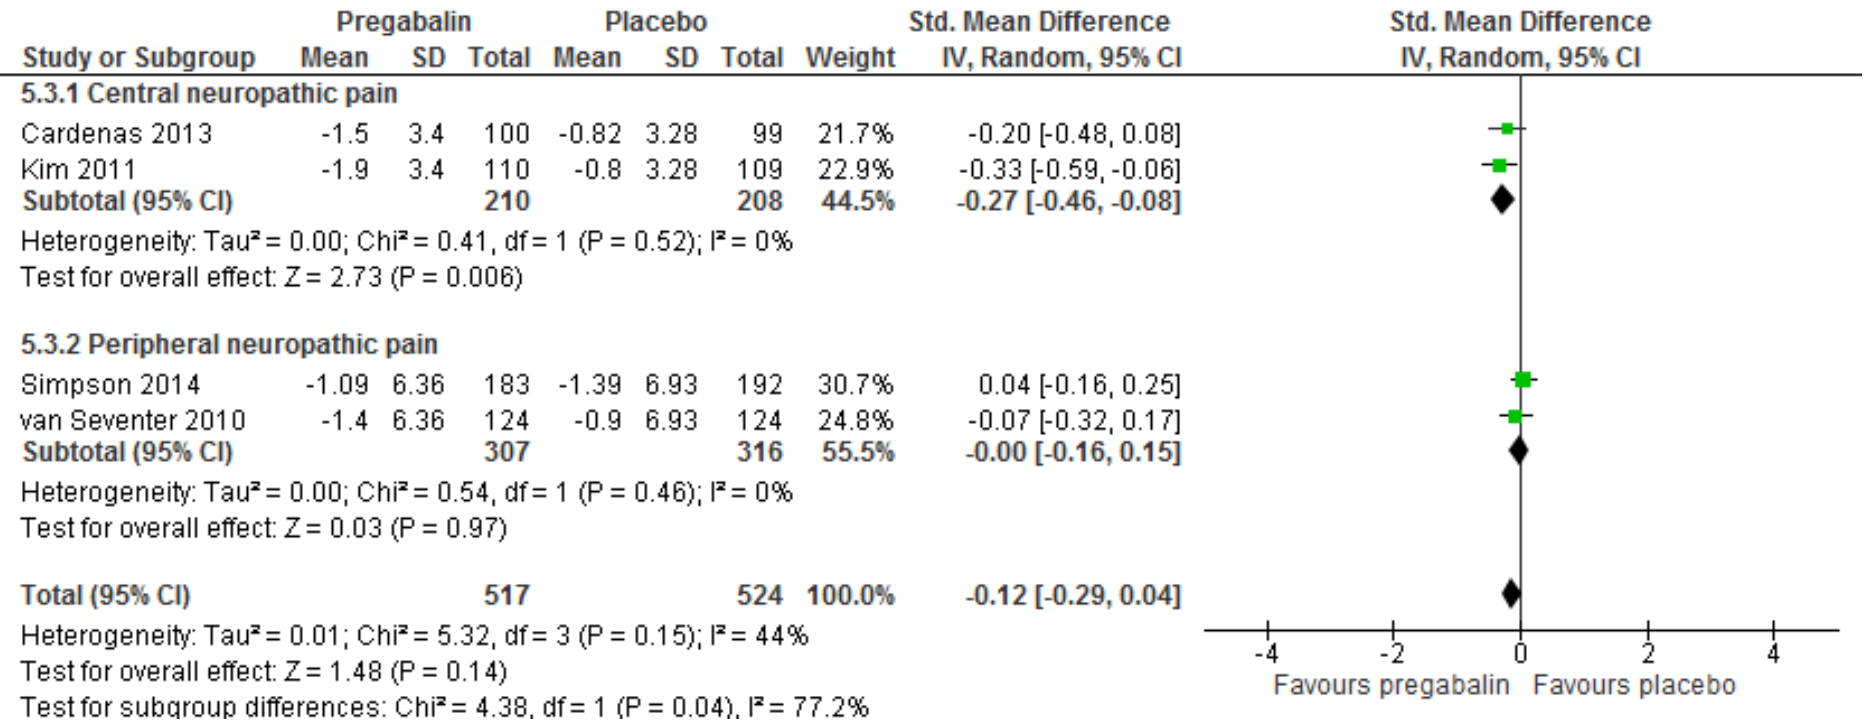



**Figure S17: Effect of pregabalin on HADS-depression scores in patients with neuropathic pain**

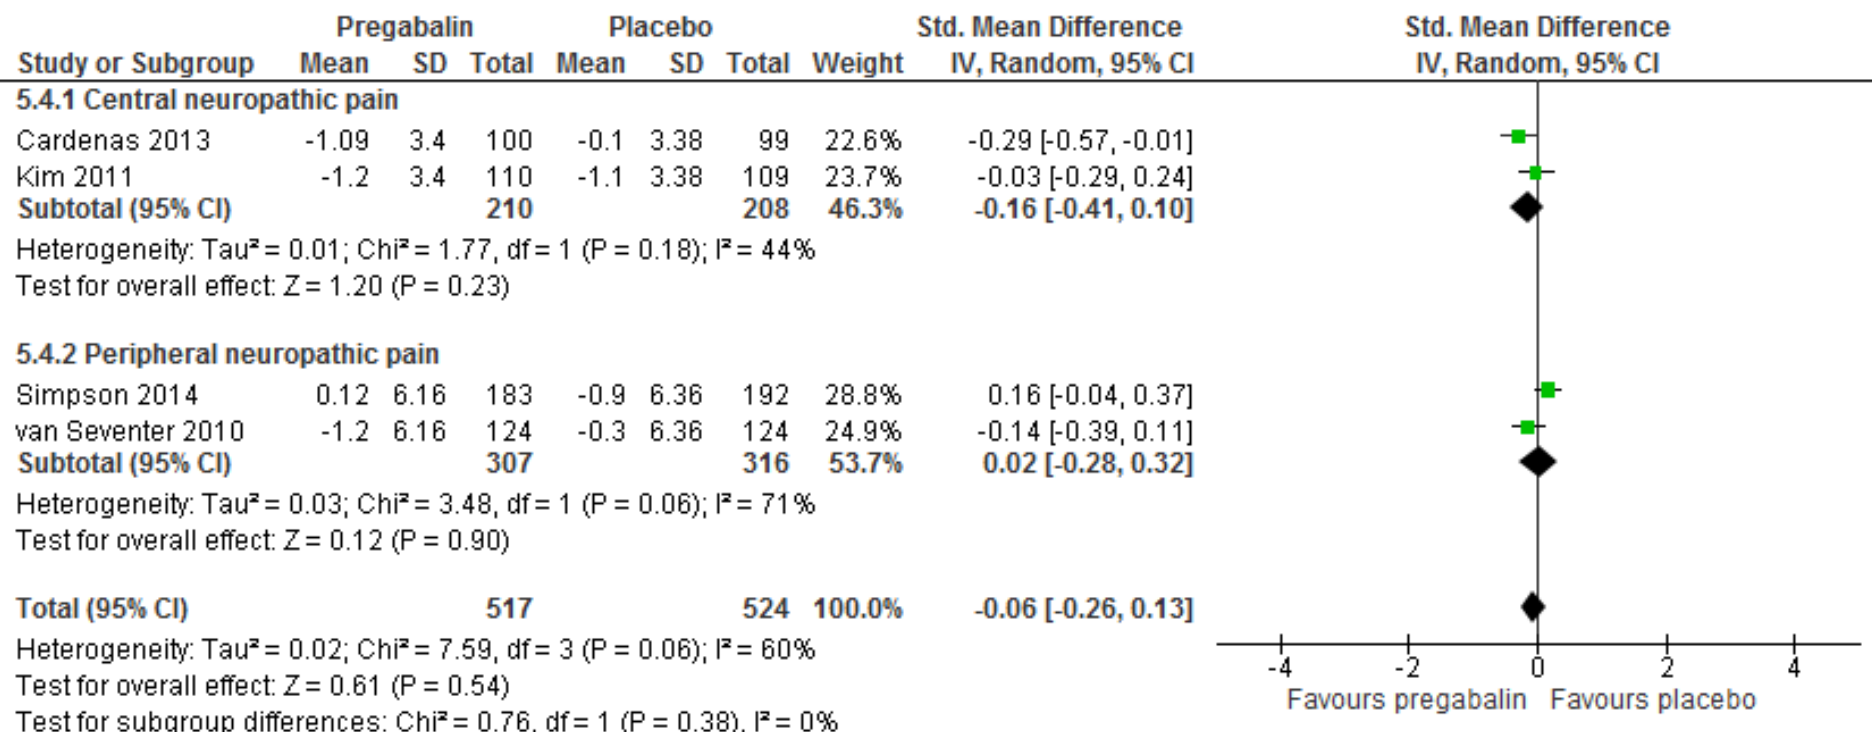

Supplement: bmjopen-2018-023600supp005.pdf [file bmjopen-2018-023600supp005.pdf]
