# Supplementary material for: Benefits and harms of pregabalin in the management of neuropathic pain: a rapid review and meta-analysis of randomised clinical trials
Source: PubMed Central journal article supplement — BMJ Open. 2019 Jan 21;9(1):e023600. doi: 10.1136/bmjopen-2018-023600 (PMC6347863; doi:10.1136/bmjopen-2018-023600), 2019-01-21
Supplement: bmjopen-2018-023600.draft_revisions.pdf [file bmjopen-2018-023600.draft_revisions.pdf]

# BMJ Open

BMJ Open is committed to open peer review. As part of this commitment we make the peer review history of every article we publish publicly available.

When an article is published we post the peer reviewers' comments and the authors' responses online. We also post the versions of the paper that were used during peer review. These are the versions that the peer review comments apply to.

The versions of the paper that follow are the versions that were submitted during the peer review process. They are not the versions of record or the final published versions. They should not be cited or distributed as the published version of this manuscript.

BMJ Open is an open access journal and the full, final, typeset and author-corrected version of record of the manuscript is available on our site with no access controls, subscription charges or pay-per-view fees (<http://bmjopen.bmj.com>).

If you have any questions on BMJ Open's open peer review process please email [info.bmjopen@bmj.com](mailto:info.bmjopen@bmj.com)

# BMJ Open

## Benefits and harms of pregabalin in the management of neuropathic pain: a rapid systematic review and meta-analysis of randomized clinical trials

|                               |                                                                                                                                                                                                                                                                                                                                                                                                                          |
|-------------------------------|--------------------------------------------------------------------------------------------------------------------------------------------------------------------------------------------------------------------------------------------------------------------------------------------------------------------------------------------------------------------------------------------------------------------------|
| Journal:                      | <i>BMJ Open</i>                                                                                                                                                                                                                                                                                                                                                                                                          |
| Manuscript ID                 | bmjopen-2018-023600                                                                                                                                                                                                                                                                                                                                                                                                      |
| Article Type:                 | Research                                                                                                                                                                                                                                                                                                                                                                                                                 |
| Date Submitted by the Author: | 17-Apr-2018                                                                                                                                                                                                                                                                                                                                                                                                              |
| Complete List of Authors:     | Onakpoya, Igho; University of Oxford, Primary Care Health Sciences<br>Thomas, Elizabeth; Bond University Faculty of Health Sciences and<br>Medicine, Faculty of Health Sciences and Medicine<br>Lee, Joseph; University of Oxford, Nuffield Department of Primary Care<br>Health Sciences<br>Goldacre, Ben; University of Oxford, Primary Care Health Sciences<br>Heneghan, Carl; Oxford University, Primary Health Care |
| Keywords:                     | pregabalin, benefits, harms, systematic review, meta-analysis                                                                                                                                                                                                                                                                                                                                                            |
|                               |                                                                                                                                                                                                                                                                                                                                                                                                                          |

SCHOLARONE™  
Manuscripts

Peer Review Only

1  
2  
3 **Benefits and harms of pregabalin in the management of neuropathic pain: a rapid**  
4 **systematic review and meta-analysis of randomized clinical trials**  
5  
6  
7  
8  
9  
10  
11  
12  
13  
14

15 Igho J Onakpoya, research fellow<sup>1</sup>, Elizabeth T Thomas, medical student<sup>2</sup>, Joseph Lee, nihr  
16 in practice fellow<sup>1</sup>, Ben Goldacre, senior clinical research fellow<sup>1</sup>, Carl J Heneghan, director<sup>1</sup>  
17  
18  
19  
20  
21

22 <sup>1</sup>University of Oxford, Centre for Evidence-Based Medicine, Nuffield Department of Primary  
23 Care Health Sciences, Radcliffe Primary Care Building, Radcliffe Observatory Quarter,  
24 Oxford, United Kingdom OX2 6GG  
25  
26  
27

28 <sup>2</sup>Faculty of Health Sciences and Medicine, Bond University, 14 University Drive, Robina,  
29 Australia QLD 4226  
30  
31  
32  
33  
34  
35  
36  
37  
38

39 **Correspondence to** IJ Onakpoya [igho.onakpoya@phc.ox.ac.uk](mailto:igho.onakpoya@phc.ox.ac.uk)  
40  
41  
42  
43  
44  
45  
46  
47  
48  
49  
50  
51  
52  
53  
54  
55  
56  
57  
58  
59  
60

## ABSTRACT

**Objective** To assess the benefits and harms of pregabalin in the management of neuropathic pain

**Design** Rapid systematic review and meta-analysis of phase III randomized placebo-controlled trials.

**Participants** Adults aged 18 and above with neuropathic pain defined according to the International Association for the Study of Pain (IASP) criteria.

**Interventions** Pregabalin or placebo, with or without co-interventions.

**Primary and secondary outcome measures** Our primary outcomes were pain (as measured using validated scales) and adverse events. Our secondary outcomes were sleep disturbance, quality of life (QOL), patient global impression of change (PGIC), clinician global impression (CGI) scale, anxiety and depression scores, overall discontinuations and discontinuations because of adverse events.

**Results** We included 28 trials comprising 6087 participants. The neuropathic pain conditions studied were diabetic peripheral neuropathy, post-herpetic neuralgia, herpes zoster, sciatica, post-stroke pain and spinal cord injury-related pain. Patients who took pregabalin reported significant reductions in pain scores compared to placebo, SMD -0.49 (95% CI -0.66 to -0.32,  $P < 0.00001$ ); very low quality evidence. Pregabalin significantly reduced sleep interference scores (NRS) compared with placebo, SMD -0.38 (95% CI -0.50 to -0.26,  $P < 0.00001$ ) moderate quality evidence. Pregabalin significantly increased the risk of adverse events compared with placebo, RR 1.33 (95% CI 1.23 to 1.44,  $P < 0.00001$ , low quality evidence). The risks of experiencing weight gain, somnolence, dizziness, peripheral oedema, fatigue, visual disturbances, ataxia, non-peripheral oedema, vertigo and euphoria were significantly increased with pregabalin. Pregabalin was significantly more likely than placebo to lead to

1  
2  
3 discontinuation of the drug because of adverse events, RR 1.91 (95% CI 1.54 to 2.37,  
4  
5 P<0.00001), low quality evidence.

6  
7 **Conclusion** Pregabalin has beneficial effects on some symptoms of neuropathic pain.

8  
9 However, its use significantly increases the risk of a number of adverse events and  
10  
11 discontinuation due to adverse events. The quality of the evidence from journal publications  
12  
13 is low.  
14  
15

#### 16 17 18 19 20 **Strengths and limitations of the study**

- 21 ● We undertook the same rigorous approach using Cochrane criteria for other systematic  
22 reviews within the time constraints.
- 23 ● This is the first review that rates the quality of the evidence for each outcome assessed.
- 24 ● The review may be prone to sampling bias, and we may have missed potentially eligible  
25 studies.
- 26 ● We did not assess the extent to which different doses of pregabalin influenced the  
27 outcomes.
- 28
- 29
- 30
- 31
- 32
- 33
- 34
- 35
- 36
- 37
- 38
- 39
- 40
- 41
- 42
- 43
- 44
- 45
- 46
- 47
- 48
- 49
- 50
- 51
- 52
- 53
- 54
- 55
- 56
- 57
- 58
- 59
- 60

## INTRODUCTION

Pregabalin is a gabapentinoid licensed for treatment of neurologic disorders. It is one of the earlier drugs approved by the United States Food and Drug Administration (FDA) (2004) for the treatment of painful diabetic neuropathy (PDN) and post-herpetic neuralgia (PHN).<sup>1</sup>

Pregabalin is thought to exert its analgesic action through antagonistic activity at the voltage gated Ca<sup>2+</sup> channels where it binds to the alpha-2-delta subunit.<sup>1,2</sup>

Prescriptions of pregabalin (and gabapentin) have markedly increased over the last few years.

In the US, prescriptions for pregabalin rose from 39 million in 2012 to 64 million in 2016 *versus* (spend increased from approximately \$2 billion to \$4.4 billion over the same period).<sup>3</sup>

In the UK, pregabalin use increased 350% over a five year period between 2008 and 2013.<sup>4</sup>

In England alone, there were over 6.2 million prescriptions of pregabalin across GP practices in 2017 costing about \$440 million.<sup>5</sup>

Pregabalin is recommended as first-line pharmacologic agent for management of neuropathic pain<sup>6</sup>. There is, however, some evidence of increased mortality attributed pregabalin in the UK,<sup>7</sup> and this has led some authors to caution clinicians about the risk of harms when prescribing.<sup>8</sup> The risks are thought to be particularly acute for patients who use heroin and those who misuse gabapentinoids. Indeed, the UK government is soon to classify the drug as a class C controlled substance because of its abuse potential and increased reports of deaths attributed to its use.<sup>9</sup> Practicing clinicians have also recently called for the evidence for the effectiveness of pregabalin to be re-examined in the light of its potential to cause harms.<sup>3,4</sup>

1  
2  
3 The objective of this rapid review was therefore to evaluate the evidence for benefits and  
4 harms of pregabalin in the treatment of neuropathic pain in adults, using evidence from  
5 published randomized clinical trials (RCTs).  
6  
7  
8  
9

## 10 11 **METHODS**

12  
13 We conducted electronic searches in the Medline, Embase, and Cochrane Central Register of  
14 Controlled Trials (CENTRAL). We searched each database from inception till January 2018.  
15  
16 No language restrictions were imposed. [See appendix 1 for a full search strategy]. We also  
17  
18 hand searched the bibliography of eligible studies.  
19  
20  
21  
22  
23

24 We included phase III double-blinded placebo-controlled RCTs (efficacy studies) assessing  
25 the effects of pregabalin on neuropathic pain in adults aged 18 years and above. We included  
26 studies on neuropathic pain based on the definition of the International Association for the  
27 Study of Pain (IASP) definition.<sup>10</sup> These included trials on diabetic neuropathy, HIV-related  
28 neuropathy, lumbar radiculopathy, post-herpetic neuralgia, and chronic postsurgical pain. We  
29 included RCTs irrespective of study size and duration. If we included RCTs with a cross-over  
30 design, we used data from the first phase of the study. We excluded phase IV trials because  
31 they are typically unblinded. We also excluded studies that combined pregabalin with other  
32 types of pain intervention because the effects of such interventions would not be exclusively  
33 due to the actions of pregabalin; however, co-interventions used were allowed. Trials that  
34 randomized participants based on response to pregabalin therapy in the run-in phase were  
35 also excluded. Our main outcomes were pain (as measured using validated scales because  
36 such scales enhance the credibility of the measured outcomes<sup>11</sup>) and adverse events. Our  
37 secondary outcomes were sleep disturbance, quality of life (QOL), patient global impression  
38  
39  
40  
41  
42  
43  
44  
45  
46  
47  
48  
49  
50  
51  
52  
53  
54  
55  
56  
57  
58  
59  
60

1  
2  
3 of change (PGIC), clinician global impression (CGI) scale, anxiety and depression, overall  
4 discontinuations and discontinuations because of adverse events.  
5  
6  
7

8  
9 The risk of bias for each included study was rated using Cochrane criteria.<sup>12</sup> Two reviewers  
10 (IJO and ETT) independently assessed the eligibility of studies, assessed the risk of bias.  
11  
12

13 Three reviewers (IJO, ETT, JL) independently extracted the data. Any disagreements were  
14 resolved through discussion. For each included study, we extracted data on study ID, settings,  
15 populations, interventions, outcomes and results.  
16  
17  
18  
19

20  
21  
22 Using the random effects model (Mantel-Haenszel) of the standard meta-analysis software  
23 (RevMan 5.3),<sup>13</sup> we computed standardized mean differences (SMDs) and 95% confidence  
24 intervals (CIs) for continuous outcomes and risk ratios with 95% CI for binary outcomes. We  
25 used pre- to post-intervention changes to assess intervention effects between pregabalin and  
26 placebo. Where studies reported data on change from baseline but did not report standard  
27 deviations (SDs), we imputed SDs based on the SD of other studies included in the meta-  
28 analysis.<sup>14</sup> We used a value of P=0.05 as our threshold for statistical significance. We  
29 assessed heterogeneity using the I-squared statistic: values of 25%, 50% and 75% judged  
30 mild, moderate and substantial heterogeneity respectively. We investigated heterogeneity  
31 using subgroup (based on central or peripheral neuropathic pain) and sensitivity (based on  
32 study quality and/or duration) analyses. We used a funnel plot to assess publication bias.  
33  
34  
35  
36  
37  
38  
39  
40  
41  
42  
43  
44  
45  
46  
47

48 Two reviewers (IJO and ETT) independently entered the data onto RevMan software and  
49 independently cross-checked each other's entry. Using the GRADEpro software (version  
50 3.6),<sup>15</sup> we rated the overall quality of the body of evidence for each outcome using the  
51 Grading of Recommendation, Assessment, Development, and Evaluation (GRADE)<sup>16</sup> criteria  
52  
53  
54  
55  
56  
57  
58  
59  
60



1  
2  
3 which examines the following domains: study design; risk of bias; inconsistency;  
4  
5 indirectness; and imprecision.  
6  
7

### 8 9 **Patient public involvement**

10  
11 Because this was a rapid review, we did not enlist the services of patient representatives in  
12  
13 this research.  
14  
15

## 16 17 **RESULTS**

18  
19 Our searches identified 1349 non-duplicate citations, out of which 62 articles were  
20  
21 considered eligible (Figure 1). We excluded 34 articles that did not fit our inclusion criteria.  
22  
23 [See Appendix 2 for list of excluded studies and the reasons for exclusion]. In total, we  
24  
25 included 28 studies<sup>17 18 19 20 21 22 23 24 25 26 27 28 29 30 31 32 33 34 35 36 37 38 39 40 41 42 43 44</sup>  
26  
27  
28 comprising 6087 participants (Table 1). The intervention duration was between three and 20  
29  
30 weeks (median 8 weeks) and all the trials were industry funded.  
31  
32  
33  
34

35  
36 Twenty three studies examined the effectiveness of pregabalin in treatment of peripheral  
37  
38 neuropathic pain including DPN, PHN and Herpes zoster (HZ) (Table 1). Five studies  
39  
40 examined the effectiveness of pregabalin for treating central neuropathic pain including  
41  
42 sciatica, post-stroke pain and spinal cord injury-related pain. Twenty five studies were  
43  
44 conducted in two or more centres. Outcome measures for pain included numerical rating  
45  
46 scale (NRS), visual assessment scale (VAS), Short-Form McGill Pain Questionnaire visual  
47  
48 assessment scale (SF-MPQ VAS), and SF-MPQ personal pain intensity (SF-MPQ PPI) index  
49  
50 [see Table 1 for full characteristics of included studies]. The overall risk of bias in the  
51  
52 included studies was moderate to high (Figures 2a and 2b). This was mainly due to  
53  
54  
55  
56  
57  
58  
59  
60

1  
2  
3 inadequate reporting of blinding procedures, selective outcome reporting and financial  
4  
5 conflicts of interest amongst study authors.  
6  
7

## 8 9 **Pain**

10  
11 Twenty one studies provided adequate data on pain using the NRS or variants of it to allow  
12  
13 meta-analysis. Meta-analysis showed a significant reduction in pain scores with pregabalin  
14  
15 compared with placebo, SMD -0.49 (95% CI -0.66 to -0.32,  $P<0.00001$ ,  $I^2=88\%$ : Figure 3). A  
16  
17 funnel plot showed that the studies were symmetrically distributed around the mean  
18  
19 difference for all trials (Figure S1). The effect was significant for peripheral neuropathic pain  
20  
21 ( $P<0.00001$ ), but not for central neuropathic pain ( $P=0.08$ ; Appendix table 1). The overall  
22  
23 quality of the evidence was very low (Summary of Findings (SoF) Table 1). Sensitivity  
24  
25 analyses revealed similar direction of effects (Appendix Table 2). Four studies that measured  
26  
27 pain using NRS did not provide adequate data for meta-analysis; three of these reported  
28  
29 significant reductions in pain scores favouring pregabalin over placebo, while one reported  
30  
31 no significant difference between groups (See Appendix Table 3).  
32  
33  
34  
35  
36

37  
38 Three studies measured pain using the VAS, and all showed significant reduction in pain  
39  
40 scores favouring pregabalin over placebo (Appendix Table 3). Nine studies measured pain  
41  
42 using SF-MPQ VAS, and all reported significant reduction in pain scores favouring  
43  
44 pregabalin over placebo. Four studies measured pain using SF-MPQ PPI index, and all  
45  
46 reported significant reduction in pain scores favouring pregabalin over placebo.  
47  
48  
49  
50  
51  
52  
53  
54  
55  
56  
57  
58  
59  
60

Table 1: Main characteristics of RCTs assessing the effects of pregabalin in the management of central and peripheral neuropathic pain

| Study ID             | Design         | Sample size      | Duration | Setting                                                                                               | Population                                                                                  | Duration of neuropathic pain         | Outcome measures                                                                                                                                                                                                                                                                                                                                                                                                                                                                                                                                             | Interventions                                            |                                                                                                                  |                                                                                                                                                                                                                                                                                                              |
|----------------------|----------------|------------------|----------|-------------------------------------------------------------------------------------------------------|---------------------------------------------------------------------------------------------|--------------------------------------|--------------------------------------------------------------------------------------------------------------------------------------------------------------------------------------------------------------------------------------------------------------------------------------------------------------------------------------------------------------------------------------------------------------------------------------------------------------------------------------------------------------------------------------------------------------|----------------------------------------------------------|------------------------------------------------------------------------------------------------------------------|--------------------------------------------------------------------------------------------------------------------------------------------------------------------------------------------------------------------------------------------------------------------------------------------------------------|
|                      |                |                  |          |                                                                                                       |                                                                                             |                                      |                                                                                                                                                                                                                                                                                                                                                                                                                                                                                                                                                              | Pregabalin                                               | Placebo                                                                                                          | Co-interventions                                                                                                                                                                                                                                                                                             |
| Arezzo 2008 [17]     | Parallel-group | PGB 82; PLA 85   | 13 weeks | 23 centres; USA                                                                                       | Men or women with T1DM or T2DM                                                              | ≥3 months                            | <b>Primary:</b> Mean pain scores (MPS); proportion of responders; Adverse events ≥3% <b>Secondary:</b> Sleep interference (11 point NRS), Present pain intensity (PPI) index; SF-MPQ VAS; CGIC; PGIC                                                                                                                                                                                                                                                                                                                                                         | 600 mg/d Fixed                                           | Not described                                                                                                    | Aspirin (up to 325 mg/d for cardiac and stroke prophylaxis), acetaminophen (up to 4 g/d), SSRIs, and benzodiazepines such as lorazepam (dosed at bedtime with stable [>30 days] regimen for sleep problems) were allowed.                                                                                    |
| Cardenas 2013 [18]   | Parallel-group | PGB 112; PLA 108 | 16 weeks | 60 centres; Chile, China, Columbia, Czech Republic, Hong Kong, India, Japan, Phillipines, Russia, USA | Patients aged ≥18 years with C2-T12 complete/incomplete SCI                                 | ≥ 12 months                          | <b>Primary:</b> Duration-adjusted average change in pain (DAAC); <b>Secondary:</b> Change in mean pain score (from baseline to endpoint); Percentage of patients with ≥30% reduction in mean pain score at end point; PGIC scores at endpoint; change in mean pain-related sleep interference score; change from baseline in mean pain at each study week; change from baseline in pain-related sleep interference scores at each week; Medical Outcomes Study-Sleep Scale (MOS-SS); Hospital Anxiety and Depression scale scores (at baseline and endpoint) | 150-600mg/d Flexible phase followed by maintenance phase | Matching grey capsule                                                                                            | Nonsteroidal anti-inflammatory drugs, cyclo-oxygenase-2 inhibitors, and acetaminophen (≤1.5 g/d in Japan, ≤4 g/d in all other countries) were permitted as rescue therapy. Antidepressants were permitted if the patient was on a stable dose within 30 days before the first visit.                         |
| Dworkin 2003 [19]    | Parallel-group | PGB 89; PLA 84   | 8 weeks  | 29 centres; USA                                                                                       | Men or women ≥18 years old with post-herpetic neuralgia                                     | ≥3 months                            | <b>Primary:</b> Pain reduction in last 24 hours; Safety and adverse events <b>Secondary:</b> SF-MPQ at baseline, weeks 1,3,5,8; daily sleep interference score; MOS-SS; SF-36; PGIC; CGIC                                                                                                                                                                                                                                                                                                                                                                    | 300mg/d, 600mg/d Fixed                                   | Identical in appearance; administered 1 capsule three times daily                                                | Permitted medications included narcotic and non-narcotic analgesics, acetaminophen (not to exceed 4g/day), nonsteroidal anti-inflammatory drugs, aspirin, and antidepressants, including selective serotonin reuptake inhibitors (provided that dosing had been stable for at least 30 days before baseline) |
| Freynhagen 2005 [20] | Parallel-group | PGB 273; PLA 65  | 12 weeks | 60 centres; 9 European countries that were not specified                                              | Men or women ≥18 years old with primary diagnosis of painful DPN or post-herpetic neuralgia | ≥3 months PHN, ≥6 months DPN         | <b>Primary:</b> Mean Pain Score; adverse events; <b>Secondary:</b> daily sleep interference diary; MOS-SS; PGIC                                                                                                                                                                                                                                                                                                                                                                                                                                              | 150-600mg/d Flexible; 300mg/d, 600mg/d Fixed             | Matching capsules; matching twice daily dosing schedule                                                          | SSRIs for treatment of depression, aspirin for myocardial infarction and stroke prophylaxis, short-acting benzodiazepines for insomnia, and paracetamol as rescue medication were allowable medications during the study period.                                                                             |
| Guan 2011 [21]       | Parallel-group | PGB 206; PLA 102 | 8 weeks  | 11 centres; China                                                                                     | Males or females 18-75 years with primary diagnosis of painful DPN or PHN                   | ≥3 months PHN, ≥1 year, <5 years DPN | <b>Primary:</b> Mean Pain score (DPRS) during preceding 24h; DAAC score; <b>Secondary:</b> Daily sleep interference scale; SF-MPQ; PGIC; CGIC; Safety and adverse events                                                                                                                                                                                                                                                                                                                                                                                     | 150-600mg/d Flexible                                     | Flexible dose placebo in matching capsules; doses titrated using same regimen                                    | NSAIDs and SSRIs allowed to be continued on stable dose                                                                                                                                                                                                                                                      |
| Holbech 2015 [22]    | Cross-over     | PGB 18; PLA 19   | 5 weeks  | 3 centres; Denmark                                                                                    | Males or females 20-85 years with polyneuropathy due to dpn                                 | ≥6 months                            | <b>Primary:</b> Total pain intensity on NRS; adverse events; <b>Secondary:</b> pain-related sleep disturbances; pain relief on 6-point verbal scale; <b>Other:</b> specific pain symptoms on the NRS; number of paracetamol tablets used as escape medication; SF-36 (health related QoL); Major Depression Inventory; QST tests                                                                                                                                                                                                                             | 150mg/d, 300mg/d Fixed                                   | Matched placebos of identical appearance to the 2 trial drugs were dosed similarly using double-dummy technique. | Up to 6 tablets of 500 mg paracetamol could be used daily as escape medication                                                                                                                                                                                                                               |
| Huffman 2015 [23]    | Cross-over     | PGB 101; PLA 102 | 6 weeks  | 36 centres; USA (25), Sweden (4), South Africa (4), Czech Republic (3)                                | Men or women ≥18 years old with painful DPN and with pain on walking                        | Not described                        | <b>Primary:</b> Numeric Rating Scale (NRS); DPN Pain on Walking (NRS); <b>Secondary:</b> 30%, 50% responders; Brief Pain Inventory-Short Form (BPI-sf); Daytime Total Activity Counts per Day; Steps per Day; Walk 12 questionnaire; Norfolk Quality of Life-Diabetic Neuropathy (Norfolk QOL-DN) Total Quality of Life (TQOL) Score; Euro QoL-5 Dimensions (EQ-5D); Mean Sleep Interference Rating Score; HADS                                                                                                                                              | 150-300 mg/day Fixed                                     | Matching placebo also administered in 3 divided doses                                                            | Not described                                                                                                                                                                                                                                                                                                |

1  
2  
3  
4  
5  
6  
7  
8  
9  
10  
11  
12  
13  
14  
15  
16  
17  
18  
19  
20  
21  
22  
23  
24  
25  
26  
27  
28  
29  
30  
31  
32  
33  
34  
35  
36  
37  
38  
39  
40  
41  
42  
43  
44  
45  
46  
47  
48  
49  
50  
51  
52  
53  
54  
55  
56  
57  
58  
59  
60

|                                                                                              |                           |                |                  |          |                                 |                                                                                                                                          |                                                                |                                                                                                                                                                                                                                                                                                                                                                                                  |                                                                 |                                                                                                   |                                                                                                                                                                                                                                                                                                                                                                                                                                                                                                                                 |
|----------------------------------------------------------------------------------------------|---------------------------|----------------|------------------|----------|---------------------------------|------------------------------------------------------------------------------------------------------------------------------------------|----------------------------------------------------------------|--------------------------------------------------------------------------------------------------------------------------------------------------------------------------------------------------------------------------------------------------------------------------------------------------------------------------------------------------------------------------------------------------|-----------------------------------------------------------------|---------------------------------------------------------------------------------------------------|---------------------------------------------------------------------------------------------------------------------------------------------------------------------------------------------------------------------------------------------------------------------------------------------------------------------------------------------------------------------------------------------------------------------------------------------------------------------------------------------------------------------------------|
| 3<br>4<br>5                                                                                  | Kanodia 2011 [24]         | Parallel-group | PGB 23; PLA 22   | 4 weeks  | 1 centre; India                 | Patients with acute herpes zoster presenting within 72 hours of onset                                                                    | < 3 days                                                       | <b>Primary:</b> Pain on linear VAS; Adverse events                                                                                                                                                                                                                                                                                                                                               | 150mg/d Fixed                                                   | Not described                                                                                     | Oral acyclovir 800mg was given 5 times per day for 7 days                                                                                                                                                                                                                                                                                                                                                                                                                                                                       |
| 6<br>7<br>8<br>9<br>10<br>11<br>12<br>13<br>14                                               | Kim 2011 [25]             | Parallel-group | PGB 110; PLA 109 | 12 weeks | 32 centres; Asia-Pacific        | Males or females ≥18 years with diagnosis of central post-stroke pain                                                                    | ≥3 months                                                      | <b>Primary:</b> Mean pain score; <b>Secondary:</b> Daily sleep interference scale (DSIS); Weekly mean pain scores; proportion of 30%, 50% responders; quantitative assessment of Neuropathic pain (QANeP); Neuropathic Pain Symptom Inventory (NPSI); Weekly mean sleep interference scores; MOS-SS; HADS; SF-MPQ VAS- Part B; Euro Quality of Life (EQ-5D); PGIC; CGIC; Safety and tolerability | 300,600mg/d Dose adjustment followed by fixed maintenance phase | Matching placebo                                                                                  | Stable medications for pain or insomnia if used normally >30 days before screening                                                                                                                                                                                                                                                                                                                                                                                                                                              |
| 15<br>16<br>17<br>18<br>19<br>20<br>21<br>22<br>23<br>24                                     | Krcovski Skvarc 2010 [26] | Parallel-group | PGB 14; PLA 15   | 3 weeks  | 1 centre; Slovenia              | Men or women 30-80 years with herpes zoster pain.                                                                                        |                                                                | <b>Primary:</b> Assessment of pain severity (11 point Likert scale); <b>Secondary:</b> patients' ratings of the severity of allodynia, hyperalgesia, and burning, prickling and tingling sensations; rating of quality of sleep and physical activity; consumption of analgesics; occurrence of adverse events; SHN; PHN                                                                         | 150 or 300mg/d Fixed                                            | Placebo also administered twice daily                                                             | Oxycodone, naproxen and/or tramadol, morphine, diclofenac                                                                                                                                                                                                                                                                                                                                                                                                                                                                       |
| 25<br>26<br>27<br>28<br>29<br>30<br>31                                                       | Esser 2004 [27]           | Parallel-group | PGB 240; PLA 97  | 5 weeks  | 45 centres; USA                 | Men or women ≥18 years old who were diagnosed with diabetes mellitus (type 1 or 2) and had distal symmetric sensorimotor polyneuropathy. | 1-5 years                                                      | <b>Primary:</b> Pain (11-point NRS); <b>Secondary:</b> daily sleep interference diary; SF-MPQ; CGIC; PGIC; SF-36; POMS; <b>Safety outcomes</b>                                                                                                                                                                                                                                                   | 75, 300, 600mg/d Fixed                                          | Placebo administered three times daily                                                            | Acetaminophen and SSRIs permitted                                                                                                                                                                                                                                                                                                                                                                                                                                                                                               |
| 32<br>33<br>34<br>35<br>36                                                                   | Liu 2015 [28]             | Parallel-group | PGB 112; PLA 110 | 8 weeks  | 22 centres; China               | Male and female ethnically Chinese patients aged ≥ 18, diagnosed with post-herpetic neuralgia                                            | Symptoms persisting ≥ 3 months after the healing of HZ lesions | <b>Primary:</b> Mean score of Daily Pain Rating Score; <b>Secondary:</b> Change from baseline on Pain VAS; Change from baseline on Present Pain Intensity (PPI) of the SF-MPQ; 30% pain responders at endpoint; change from baseline in weekly mean pain score; change from baseline in sleep interference score (11-point NRS); CGIC; PGIC; MOS-SS; Adverse events                              | 150mg/d, 300mg/d Fixed                                          | Matched placebo capsules on the same dosing schedule                                              | Concomitant use of medications permitted except antidepressants, epileptics, analgesics or corticosteroids, skeletal muscle relaxants, mexelitin, and dextromethorphan as well as electrotherapy, transcutaneous electrical nerve stimulation, acupuncture, and neurosurgical therapy.                                                                                                                                                                                                                                          |
| 37<br>38<br>39<br>40<br>41<br>42<br>43<br>44<br>45<br>46<br>47<br>48<br>49<br>50<br>51<br>52 | Mathieson 2017 [29]       | Parallel-group | PGB 108; PLA 101 | 8 weeks  | Number not specified; Australia | Patients with sciatica                                                                                                                   | ≥1 week, <1 year                                               | <b>Primary:</b> Average leg-pain intensity score over the course of previous 24 hours as assessed at 8 weeks and 52 weeks; <b>Secondary:</b> extent of disability (Roland Disability Questionnaire for sciatica); back pain intensity; global perceived effect; Quality of Life as measured on Short Form Health Survey 12; adverse events                                                       | 150-600mg/d Flexible                                            | Matching placebo capsules were packaged in white, opaque, sealed containers at a central pharmacy | Concomitant therapies included physical therapies as well as other analgesic medications (except for adjuvant analgesic agents), which would ideally be prescribed in accordance with the World Health Organization pain ladder. Trial clinicians were asked not to prescribe certain medicines (antiepileptic medications, selective serotonin reuptake inhibitors, serotonin-norepinephrine reuptake inhibitors, tricyclic antidepressants, topical lidocaine, and benzodiazepines) or to schedule interventional procedures. |

|                                                                                                                                                                                                                                                                                                                                                             |                      |                |                  |                                   |                                                                                      |                                                                                                                                                                                     |                                                                                                   |                                                                                                                                                                                                                                                                                                                                                                                                                                                                                                                                                                                                                                                                                                                                                                                                                    |                        |                                                                                 |                                                                                                                                                                                                                                                                              |
|-------------------------------------------------------------------------------------------------------------------------------------------------------------------------------------------------------------------------------------------------------------------------------------------------------------------------------------------------------------|----------------------|----------------|------------------|-----------------------------------|--------------------------------------------------------------------------------------|-------------------------------------------------------------------------------------------------------------------------------------------------------------------------------------|---------------------------------------------------------------------------------------------------|--------------------------------------------------------------------------------------------------------------------------------------------------------------------------------------------------------------------------------------------------------------------------------------------------------------------------------------------------------------------------------------------------------------------------------------------------------------------------------------------------------------------------------------------------------------------------------------------------------------------------------------------------------------------------------------------------------------------------------------------------------------------------------------------------------------------|------------------------|---------------------------------------------------------------------------------|------------------------------------------------------------------------------------------------------------------------------------------------------------------------------------------------------------------------------------------------------------------------------|
| 1<br>2<br>3<br>4<br>5<br>6<br>7<br>8<br>9<br>10<br>11<br>12<br>13<br>14<br>15<br>16<br>17<br>18<br>19<br>20<br>21<br>22<br>23<br>24<br>25<br>26<br>27<br>28<br>29<br>30<br>31<br>32<br>33<br>34<br>35<br>36<br>37<br>38<br>39<br>40<br>41<br>42<br>43<br>44<br>45<br>46<br>47<br>48<br>49<br>50<br>51<br>52<br>53<br>54<br>55<br>56<br>57<br>58<br>59<br>60 | Moon 2010 [30]       | Parallel-group | PGB 162; PLA 78  | 10 weeks                          | Multicentre (number not specified); Korea                                            | Korean patients aged 18 years with neuropathic pain (diabetic peripheral neuropathy, postherpetic neuralgia, or posttraumatic neuropathic pain)                                     | Mean duration of pain pregabalin patients- 3 years, placebo patients 3.2 years                    | <b>Primary:</b> Endpoint mean DPRS score, Secondary: weekly mean DPRS score, duration adjusted average change (DAAC) of adjusted mean DPRS from baseline to endpoint, proportion of responders (whose scores reduced by 30% or 50%), Daily Sleep Interference Scale (DSIS), Euro Quality of Life assessment (EQ-5D); utility and VAS score; MOS-SS; HADS; PGIC; CGIC; <b>Tolerability evaluation</b> of adverse events and vital signs                                                                                                                                                                                                                                                                                                                                                                             | 150-600mg/d Flexible   | Matching placebo capsules provided by Pfizer                                    | Most patients were taking drug therapy at baseline, and the majority (83.8%) remained on concomitant drug therapy during the study, including one-third who received tricyclic antidepressants.                                                                              |
|                                                                                                                                                                                                                                                                                                                                                             | Rauk 2013 [31]       | Parallel-group | PGB 56; PLA 112  | 20 weeks                          | 85 centres; USA                                                                      | Men or women ≥18 years old who were diagnosed with diabetes mellitus (type 1 or 2) and had pain attributed to DPN, defined as painful distal symmetric sensorimotor polyneuropathy. | ≥6 months, <5 years                                                                               | <b>Primary:</b> Change from baseline in pain intensity score (11 point PI-NRS); <b>Secondary:</b> Change from baseline in mean 24-hour average pain intensity score, daytime average pain intensity score, nighttime average pain intensity score, current pain intensity score, daytime worst pain intensity score, nighttime worst pain intensity score, sleep interference score, and rescue analgesia consumption (mg); Neuropathic Pain Scale (NPS); SF-MPQ; pre- and post-50-foot (15 meter) walk pain scores; PGIC; CGIC; proportion of subjects achieving various levels of reduction in the 24-hour average pain intensity score; time to onset of sustained improvement in the 24-hour average pain intensity score; POMS; SF-36 health-related quality of life questionnaire; <b>Safety assessments</b> | 300mg/d Fixed          | Matching placebo in blister card                                                | Acetaminophen, up to 3 g/day, was allowed as rescue medication for pain throughout the trial but was not allowed within 24 hours of any site visit for assessments.                                                                                                          |
|                                                                                                                                                                                                                                                                                                                                                             | Richter 2005 [32]    | Parallel-group | PGB 161; PLA 85  | 6 weeks                           | Multicentre; not specified                                                           | Patients with diabetes and painful distal symmetrical sensorimotor polyneuropathy                                                                                                   | 1-5 years                                                                                         | <b>Primary:</b> Pain; Adverse events; <b>Secondary:</b> Pain characteristics (SF-MPQ, PPI); sleep interference (11 point NRS 0 to 10); health status (SF-36); psychologic state (POMS); global improvement (PGIC, CGIC)                                                                                                                                                                                                                                                                                                                                                                                                                                                                                                                                                                                            | 150mg/d, 600mg/d Fixed | Matching dose and schedule                                                      | Aspirin (for prophylaxis of myocardial infarction and transient ischemic attacks), acetaminophen (3 g/day), and stable doses of serotonin reuptake inhibitors were allowed.                                                                                                  |
|                                                                                                                                                                                                                                                                                                                                                             | Rosenstock 2004 [33] | Parallel-group | PGB 76; PLA 70   | 8 weeks                           | 25 centres                                                                           | Men or women ≥18 years old with type 1 or 2 diabetes mellitus who reported symmetrical painful symptoms in distal extremities for a period of 1-5 years prior to study              | 1-5 years                                                                                         | <b>Primary:</b> Endpoint mean score <b>Secondary:</b> SF-MPQ-Sensory, affective and total score; daily sleep interference score; PGIC; CGIC; SF-36; Profile of Mood States (POMS); <b>Safety</b>                                                                                                                                                                                                                                                                                                                                                                                                                                                                                                                                                                                                                   | 300mg/d Fixed          | Lactose USP, 1 capsule three times daily                                        | Acetaminophen (up to 4 g/day), aspirin (up to 325 mg/day for myocardial infarction or transient ischemic attack prophylaxis), and serotonin reuptake inhibitors provided no dose changes occurred within 30 days prior to randomization or during the study)                 |
|                                                                                                                                                                                                                                                                                                                                                             | Sabatowski 2004 [34] | Parallel-group | PGB 157; PLA 81  | 8 weeks                           | 53 centres; Europe, Australia                                                        | Men or women ≥18 years old with post-herpetic neuralgia                                                                                                                             | ≥6 months                                                                                         | <b>Primary:</b> Endpoint mean score; <b>Secondary:</b> mean sleep interference scores, PGIC, CGIC, SF-36 health survey, Zung Self-Rating Depression Scale, VAS of the SF-MPQ, <b>Adverse events</b>                                                                                                                                                                                                                                                                                                                                                                                                                                                                                                                                                                                                                | 150mg/d, 300mg/d Fixed | Identical in appearance                                                         | Patients allowed to continue acetaminophen (up to 3 g/day), non-steroidal anti-inflammatory drugs, opioid or non-opioid analgesics, or antidepressants.                                                                                                                      |
|                                                                                                                                                                                                                                                                                                                                                             | Natoh 2011 [35]      | Parallel-group | PGB 179; PLA 90  | 13 weeks<br>**intervention period | 62 centres; Japan                                                                    | Men or women ≥18 years old with diabetic peripheral neuropathy                                                                                                                      | ≥ 1 year                                                                                          | <b>Primary:</b> Change from baseline in mean weekly pain score at week 13 using a 11 point NRS; <b>Secondary:</b> weekly mean pain scores, responder rates, SF-MPQ score, weekly mean sleep interference scores using 11-point NRS; MOS-Sleep Scale, SF-36, PGIC, CGIC, <b>Safety:</b> Adverse events.                                                                                                                                                                                                                                                                                                                                                                                                                                                                                                             | 300mg/d, 600mg/d Fixed | Not described, same schedule                                                    | Not described                                                                                                                                                                                                                                                                |
|                                                                                                                                                                                                                                                                                                                                                             | Shabbir 2011 [36]    | Parallel-group | PGB 70; PLA 70   | 6 weeks                           | 2 centres; Mayo Hospital and Services Hospital, Lahore.                              | Men or women ≥18 years old with diabetic peripheral neuropathy                                                                                                                      | ≥6 months                                                                                         | <b>Primary:</b> Reduction in pain (measured with NRS); responders who experienced 50% or more reduction in baseline pain score on NRS                                                                                                                                                                                                                                                                                                                                                                                                                                                                                                                                                                                                                                                                              | 150-600mg/d Flexible   | Not described                                                                   | Not described                                                                                                                                                                                                                                                                |
|                                                                                                                                                                                                                                                                                                                                                             | Siddall 2006 [37]    | Parallel-group | PGB 70; PLA 67   | 12 weeks                          | 8 centres; Australia                                                                 | Patients with central neuropathic pain in spinal cord injury                                                                                                                        | Persisted continuously for at least 3 months or with relapses and remission for at least 6 months | <b>Primary:</b> Endpoint mean pain scores, Sleep-interference scores, SF-MPQ Total, sensory and affective scores, from which VAS and PPI score was derived. MOS-sleep scale and HADS, PGIC; <b>Tolerability and safety</b>                                                                                                                                                                                                                                                                                                                                                                                                                                                                                                                                                                                         | 150-600mg/d Flexible   | Placebo also administered twice daily                                           | 70% of patients taking other medications too: opiates, tricyclics, AEDs, NSAIDs/Cox2, Benzos, SSR/SSNI, Muscle relaxants.                                                                                                                                                    |
|                                                                                                                                                                                                                                                                                                                                                             | Simpson 2010 [38]    | Parallel-group | PGB 151; PLA 151 | 14 weeks                          | 44 centres; USA, Puerto Rico                                                         | Men or women ≥18 years old with painful HIV-DSP                                                                                                                                     | ≥ 3 months                                                                                        | <b>Primary:</b> Change from baseline in mean NPRS score; <b>Secondary:</b> change in sleep interference scores; MOS-Sleep Scale; PGIC; Pain- modified Brief Pain Inventory; Gracely Pain Scale (GPS); <b>Safety:</b> adverse events                                                                                                                                                                                                                                                                                                                                                                                                                                                                                                                                                                                | 150-600mg/d Flexible   | Placebo also administered twice daily                                           | Neurotoxic antiretroviral (ARV) drugs known to cause sensory neuropathy clinically similar to HIV-DSP must have been on stable doses for ≥3 months before screening Doses of other pain medications had to be stable for ≥1 month before treatment and throughout the study. |
|                                                                                                                                                                                                                                                                                                                                                             | Simpson 2014 [39]    | Parallel-group | PGB 183; PLA 194 | 16 weeks                          | 45 centres; South Africa, USA, India, Columbia, Thailand, Peru, Puerto Rico, Poland. | Men and women ≥18 years of age with HIV neuropathy                                                                                                                                  | ≥ 3 months                                                                                        | <b>Primary:</b> Change in Pain scores (NRS); <b>Secondary:</b> PGIC/CGIC; Brief Pain Symptom Inventory short form (BPI-sf); MOS-SS; Pain-related sleep interference and overall sleep disturbance (NRS-Sleep scale); Safety                                                                                                                                                                                                                                                                                                                                                                                                                                                                                                                                                                                        | 150-600mg/d Flexible   | Matching placebo delivered through system for randomization and drug dispensing | NSAIDs, if taken at stable dose for ≥4 weeks before study, antidepressants without efficacy for neuropathic pain if taken at stable dose for ≥30 days before study [SSRIs, bupropion, trazodone], nonbenzodiazepine hypnotics no more than                                   |

1  
2  
3  
4  
5  
6  
7  
8  
9  
10  
11  
12  
13  
14  
15  
16  
17  
18  
19  
20  
21  
22  
23  
24  
25  
26  
27  
28  
29  
30  
31  
32  
33  
34  
35  
36  
37  
38  
39  
40  
41  
42  
43  
44  
45  
46  
47  
48  
49  
50  
51  
52  
53  
54  
55  
56  
57  
58  
59  
60

|                        |                |                  |          |                                                                                                                           |                                                                                                       |                 |                                                                                                                                                                                                                                                             |                                               |                                                                                          |                                                                                                                                                                                                                                                        |
|------------------------|----------------|------------------|----------|---------------------------------------------------------------------------------------------------------------------------|-------------------------------------------------------------------------------------------------------|-----------------|-------------------------------------------------------------------------------------------------------------------------------------------------------------------------------------------------------------------------------------------------------------|-----------------------------------------------|------------------------------------------------------------------------------------------|--------------------------------------------------------------------------------------------------------------------------------------------------------------------------------------------------------------------------------------------------------|
|                        |                |                  |          |                                                                                                                           |                                                                                                       |                 |                                                                                                                                                                                                                                                             |                                               |                                                                                          | once/week for sleep disturbance if clinically essential, rescue therapy of oral acetaminophen (max 3g/day), low dose ( $\leq 650$ mg/day) aspirin and stable antiretroviral treatment >8 weeks before study                                            |
| Stacey 2008 [40]       | Parallel-group | PGB 179; PLA 90  | 4 weeks  | 42 centres; United States, Germany, Italy, Spain, and United Kingdom                                                      | Men or women $\geq 18$ years old with post-herpetic neuralgia                                         | $\geq 3$ months | <b>Primary:</b> Pain reduction; time to onset of meaningful pain relief; <b>Secondary:</b> Daily sleep interference score; PGIC; VAS of the SF-MPQ; VAS anxiety; VAS allodynia; <b>Safety evaluation</b>                                                    | 150-600mg/d Flexible dose; 300mg/d Fixed dose | Placebo also administered twice daily                                                    | Concomitant pain treatments permitted given that it must be stable for at least 30 days                                                                                                                                                                |
| Qolle 2008 [41]        | Parallel-group | PGB 299; PLA 96  | 12 weeks | 58 centres; Germany, Hungary, Poland, United Kingdom, Australia, and South Africa                                         | Men or women $\geq 18$ years old with painful symmetrical sensorimotor polyneuropathy due to diabetes | $\geq 1$ year   | <b>Primary:</b> Pain reduction (according to 11-point NRS) from baseline; treatment responders; <b>Secondary:</b> PGIC; CGIC; EuroQoL Health Utilities Index; Daily pain-related sleep-interference scores; EQ-5D (VAS); <b>Safety evaluation</b>           | 150, 300, 300/600mg/d Fixed                   | Placebo also administered twice daily                                                    | SSRIs for depression or anxiety given in a stable dose for >30 days                                                                                                                                                                                    |
| Van Seventer 2006 [42] | Parallel-group | PGB 275; PLA 93  | 13 weeks | 76 centres                                                                                                                | Men or women $\geq 18$ years old with post-herpetic neuralgia                                         | >3 months       | <b>Primary:</b> Endpoint mean pain scores; patients with $\geq 50\%$ and $\geq 30\%$ reduction in pain score from baseline; weekly mean pain scores; <b>Secondary:</b> endpoint mean sleep-interference scores, weekly mean sleep-interference scores, PGIC | 150, 300, 600mg/d Fixed                       | Placebo also administered twice daily                                                    | non-narcotic analgesics, e.g., noramidopyrine and paracetamol, and stable regimens of opioids, anti-inflammatories, and antidepressants                                                                                                                |
| Van Seventer 2010 [43] | Parallel-group | PGB 127; PLA 127 | 8 weeks  | 44 centres; Belgium, Canada, Denmark, Finland, Italy, Netherlands, Portugal, Romania, Sweden, Switzerland, United Kingdom | Men or women aged 18–80 with post-traumatic peripheral neuropathic pain                               | $\geq 3$ months | <b>Primary:</b> End-point mean pain score; <b>Secondary:</b> rating of extent to which pain interfered with sleep; MOS-SS; HADS; mBPI-sf; PGIC; <b>Tolerability and safety assessment</b>                                                                   | 150-600mg/d Flexible                          | Placebo also administered twice daily                                                    | NSAIDs, COX-2 inhibitors, opioid and non-opioid analgesics, anti-epileptic drugs, antidepressant medications, other concomitant medications if they had been stable for at least 1 month before the study and would remain stable throughout the study |
| Franken 2008 [44]      | Parallel-group | PGB 20; PLA 20   | 4 weeks  | 1 centre; Netherlands                                                                                                     | Men and women $\geq 18$ years old with central neuropathic pain                                       | $\geq 6$ months | <b>Primary:</b> Pain intensity score (VAS); Mean endpoint pain score; Pain Disability Index (PDI); EQ-5D; Medical Outcomes Short-form Health Survey questionnaire 36 (SF36); <b>Safety</b>                                                                  | 150-600mg/d Flexible                          | Flexible dose placebo (1-4 capsules per day); matching capsules; on same dosing schedule | Adjuvant analgesics                                                                                                                                                                                                                                    |

ABBREVIATIONS: CGIC: Clinician global impression of change; PGB: Pregabalin; PGIC: Patient global impression of change; PLA: Placebo; SF-MPQ PPI: Short-Form McGill Pain Questionnaire *personal pain intensity*; SF-MPQ VAS: Short-Form McGill Pain Questionnaire visual assessment scale; VAS: Visual assessment scale

| Summary of Findings Table 1: Effect of pregabalin on NRS scores in patients with neuropathic pain                                                                                                                                                                                                                                                                                                                                                                                                                                                               |                                          |                                                                                                                                                                           |                          |                              |                                       |                            |
|-----------------------------------------------------------------------------------------------------------------------------------------------------------------------------------------------------------------------------------------------------------------------------------------------------------------------------------------------------------------------------------------------------------------------------------------------------------------------------------------------------------------------------------------------------------------|------------------------------------------|---------------------------------------------------------------------------------------------------------------------------------------------------------------------------|--------------------------|------------------------------|---------------------------------------|----------------------------|
| Patient or population: patients with neuropathic pain                                                                                                                                                                                                                                                                                                                                                                                                                                                                                                           |                                          |                                                                                                                                                                           |                          |                              |                                       |                            |
| Settings:                                                                                                                                                                                                                                                                                                                                                                                                                                                                                                                                                       |                                          |                                                                                                                                                                           |                          |                              |                                       |                            |
| Intervention: Effect of pregabalin on pain                                                                                                                                                                                                                                                                                                                                                                                                                                                                                                                      |                                          |                                                                                                                                                                           |                          |                              |                                       |                            |
| Outcomes                                                                                                                                                                                                                                                                                                                                                                                                                                                                                                                                                        | Illustrative comparative risks* (95% CI) |                                                                                                                                                                           | Relative effect (95% CI) | No of Participants (studies) | Quality of the evidence (GRADE)       | Comments                   |
|                                                                                                                                                                                                                                                                                                                                                                                                                                                                                                                                                                 | Assumed risk Control                     | Corresponding risk Effect of pregabalin in pain                                                                                                                           |                          |                              |                                       |                            |
| Mean Pain Score                                                                                                                                                                                                                                                                                                                                                                                                                                                                                                                                                 |                                          | The mean mean pain score in the intervention groups was <b>0.49 standard deviations lower</b> (0.66 to 0.32 lower)                                                        |                          | 5093 (21 studies)            | ⊕⊖⊖⊖ <b>very low</b> <sup>1,2</sup>   | SMD -0.49 (-0.66 to -0.32) |
| Mean Pain Score - Central neuropathic pain (including sciatica)                                                                                                                                                                                                                                                                                                                                                                                                                                                                                                 |                                          | The mean mean pain score - central neuropathic pain (including sciatica) in the intervention groups was <b>0.38 standard deviations lower</b> (0.8 lower to 0.04 higher)  |                          | 785 (4 studies)              | ⊕⊖⊖⊖ <b>very low</b> <sup>2,3,4</sup> | SMD -0.38 (-0.8 to 0.04)   |
| Mean Pain Score - Peripheral neuropathic pain (includes PDN, HZ & PHN)                                                                                                                                                                                                                                                                                                                                                                                                                                                                                          |                                          | The mean mean pain score - peripheral neuropathic pain (includes pdn, hz & phn) in the intervention groups was <b>0.52 standard deviations lower</b> (0.71 to 0.33 lower) |                          | 4308 (17 studies)            | ⊕⊖⊖⊖ <b>very low</b> <sup>1,2</sup>   | SMD -0.52 (-0.71 to -0.33) |
| *The <b>corresponding risk</b> (and its 95% confidence interval) is based on the assumed risk in the comparison group and the <b>relative effect</b> of the intervention (and its 95% CI).<br><b>CI</b> : Confidence interval; <b>NRS</b> : Numerical rating scale; <b>SMD</b> : Standard mean deviation; <b>PDN</b> : Painful diabetic neuropathy; <b>HZ</b> : Herpes zoster; <b>PHN</b> : Post-herpetic neuralgia                                                                                                                                             |                                          |                                                                                                                                                                           |                          |                              |                                       |                            |
| GRADE Working Group grades of evidence<br><b>High quality</b> : Further research is very unlikely to change our confidence in the estimate of effect.<br><b>Moderate quality</b> : Further research is likely to have an important impact on our confidence in the estimate of effect and may change the estimate.<br><b>Low quality</b> : Further research is very likely to have an important impact on our confidence in the estimate of effect and is likely to change the estimate.<br><b>Very low quality</b> : We are very uncertain about the estimate. |                                          |                                                                                                                                                                           |                          |                              |                                       |                            |
| <sup>1</sup> Inconsistency in allocation concealment and blinding, selective reporting, authors had financial ties to industry sponsor<br><sup>2</sup> Substantial heterogeneity<br><sup>3</sup> Industry-sponsored, selective reporting<br><sup>4</sup> Wide confidence interval                                                                                                                                                                                                                                                                               |                                          |                                                                                                                                                                           |                          |                              |                                       |                            |

## Adverse events

Figure 4 shows that pregabalin was significantly more likely to cause adverse events compared with placebo, RR 1.33 (95% CI 1.23 to 1.44,  $P < 0.00001$ ,  $I^2 = 52\%$ ) (Figure 4). This translates into an absolute effect of 145 (95% CI 101 to 194) more adverse events per 1000 treated. The overall quality of the evidence was low (SoF Table 2). Sensitivity analyses revealed similar direction of effects (Appendix Table 2). The risk of experiencing individual adverse events of weight gain, somnolence, dizziness, peripheral oedema, fatigue, visual disturbances, ataxia, non-peripheral oedema, dry mouth, vertigo and euphoria were significantly increased with pregabalin compared with placebo (see Appendix Table 1 and Figures S2 to S12). Pregabalin was also significantly more likely to cause discontinuation because of adverse events (RR 1.91, 95% CI 1.54 to 2.37,  $P < 0.00001$ ,  $I^2 = 0\%$ ); the quality of the evidence was low (SoF Table 2; Appendix Table 1; and Figure S13). Sensitivity analyses by study duration revealed similar direction of effects, but there was no significant difference with higher quality studies (Appendix Table 2).

There was no significant difference in the risk of serious adverse events (RR 0.9; 95% CI 0.66 to 1.24,  $P = 0.50$ ,  $I^2 = 0\%$ ; SoF Table 2; Appendix Table 1; and Figure S14); the quality of the evidence was moderate. Sensitivity analyses showed a significant effect in favour on pregabalin with three higher quality studies, but there was no difference based on study duration (Appendix Table 2). In total, six deaths were reported across four trials, five in pregabalin group and one in placebo: RR 0.86, 95% CI 0.18 to 4.06,  $P = 0.85$ ,  $I^2 = 0\%$ .



| <b>Summary of Findings Table 2: Effect of pregabalin on adverse events in patients with neuropathic pain</b>                                                                                                                                                                                                   |                                          |                                                           |                           |                              |                                 |                             |
|----------------------------------------------------------------------------------------------------------------------------------------------------------------------------------------------------------------------------------------------------------------------------------------------------------------|------------------------------------------|-----------------------------------------------------------|---------------------------|------------------------------|---------------------------------|-----------------------------|
| <b>Patient or population:</b> patients with Neuropathic pain                                                                                                                                                                                                                                                   |                                          |                                                           |                           |                              |                                 |                             |
| <b>Settings:</b>                                                                                                                                                                                                                                                                                               |                                          |                                                           |                           |                              |                                 |                             |
| <b>Intervention:</b> Effect of pregabalin on adverse events                                                                                                                                                                                                                                                    |                                          |                                                           |                           |                              |                                 |                             |
| Outcomes                                                                                                                                                                                                                                                                                                       | Illustrative comparative risks* (95% CI) |                                                           | Relative effect (95% CI)  | No of Participants (studies) | Quality of the evidence (GRADE) | Number needed to harm (NNH) |
|                                                                                                                                                                                                                                                                                                                | Assumed risk Control                     | Corresponding risk Effect of pregabalin on adverse events |                           |                              |                                 |                             |
| Adverse events                                                                                                                                                                                                                                                                                                 | Study population                         |                                                           | RR 1.33<br>(1.23 to 1.44) | 4010<br>(19 studies)         | ⊕⊕⊖⊖<br>low <sup>1,2</sup>      | 6 (5 to 9)                  |
|                                                                                                                                                                                                                                                                                                                | 523 per 1000                             | 696 per 1000<br>(643 to 753)                              |                           |                              |                                 |                             |
|                                                                                                                                                                                                                                                                                                                | Moderate                                 |                                                           |                           |                              |                                 |                             |
| Discontinuations because of adverse events                                                                                                                                                                                                                                                                     | Study population                         |                                                           | RR 1.91<br>(1.54 to 2.37) | 5426<br>(24 studies)         | ⊕⊕⊖⊖<br>low <sup>1,3</sup>      | 22 (15 to 37)               |
|                                                                                                                                                                                                                                                                                                                | 51 per 1000                              | 98 per 1000<br>(79 to 121)                                |                           |                              |                                 |                             |
|                                                                                                                                                                                                                                                                                                                | Moderate                                 |                                                           |                           |                              |                                 |                             |
| Serious adverse events                                                                                                                                                                                                                                                                                         | Study population                         |                                                           | RR 0.9<br>(0.66 to 1.24)  | 4272<br>(16 studies)         | ⊕⊕⊕⊖<br>moderate <sup>1</sup>   | 289 (-121 to 85)            |
|                                                                                                                                                                                                                                                                                                                | 35 per 1000                              | 31 per 1000<br>(23 to 43)                                 |                           |                              |                                 |                             |
|                                                                                                                                                                                                                                                                                                                | Moderate                                 |                                                           |                           |                              |                                 |                             |
|                                                                                                                                                                                                                                                                                                                |                                          | 20 per 1000                                               | 18 per 1000<br>(13 to 25) |                              |                                 |                             |
| *The basis for the <b>assumed risk</b> (e.g. the median control group risk across studies) is provided in footnotes. The <b>corresponding risk</b> (and its 95% confidence interval) is based on the assumed risk in the comparison group and the <b>relative effect</b> of the intervention (and its 95% CI). |                                          |                                                           |                           |                              |                                 |                             |
| CI: Confidence interval;                                                                                                                                                                                                                                                                                       |                                          |                                                           |                           |                              |                                 |                             |
| GRADE Working Group grades of evidence                                                                                                                                                                                                                                                                         |                                          |                                                           |                           |                              |                                 |                             |
| <b>High quality:</b> Further research is very unlikely to change our confidence in the estimate of effect.                                                                                                                                                                                                     |                                          |                                                           |                           |                              |                                 |                             |
| <b>Moderate quality:</b> Further research is likely to have an important impact on our confidence in the estimate of effect and may change the estimate.                                                                                                                                                       |                                          |                                                           |                           |                              |                                 |                             |
| <b>Low quality:</b> Further research is very likely to have an important impact on our confidence in the estimate of effect and is likely to change the estimate.                                                                                                                                              |                                          |                                                           |                           |                              |                                 |                             |
| <b>Very low quality:</b> We are very uncertain about the estimate.                                                                                                                                                                                                                                             |                                          |                                                           |                           |                              |                                 |                             |
| <sup>1</sup> Selective reporting, authors had financial ties to industry sponsor                                                                                                                                                                                                                               |                                          |                                                           |                           |                              |                                 |                             |
| <sup>2</sup> Moderate heterogeneity                                                                                                                                                                                                                                                                            |                                          |                                                           |                           |                              |                                 |                             |
| <sup>3</sup> Wide confidence interval                                                                                                                                                                                                                                                                          |                                          |                                                           |                           |                              |                                 |                             |

### **Sleep disturbance**

Twenty-one studies measured sleep interference using the NRS sleep interference scale or variants of it. Pregabalin significantly reduced sleep interference scores compared with placebo: SMD -0.38, 95% CI -0.50 to -0.26,  $P < 0.00001$ ,  $I^2 = 32\%$ ; the quality of the evidence was moderate (SoF Table 3; Appendix Table 1; and Figure S15). Fourteen studies reported sleep interference outcome measures with the NRS scale but did not provide adequate data for statistical pooling; 12 of these reported significant reductions in sleep interference scores favouring pregabalin over placebo, while two studies reported no significant difference between groups (Appendix Table 3). Seven studies measured sleep outcomes using the Medical Outcomes Study Sleep Scale (MOS-Sleep). We could not pool results from these studies because of insufficient data. All the studies reported significant improvements in sleep scores in favour of pregabalin over placebo (Appendix Table 3).

### **Quality of life (QOL)**

Four studies assessed QOL using EQ-5D scores or variants of it. Two of these reported significant improvements with pregabalin compared with placebo, while the other two reported no significant differences between groups (Appendix Table 3).

### **Patient Global Impression of Change (PGIC)**

Thirteen studies reported this outcome. Ten studies reported significant improvements in PGIC scores with pregabalin compared with placebo, while three studies found no significant differences between groups (Appendix Table 3). We could not pool results from these studies because insufficient data were published.

| Summary of Findings Table 3: Effect of pregabalin on sleep scores in patients with neuropathic pain                                                                                                                                                                                                            |                                          |                                                                                                                      |                          |                              |                                 |                           |
|----------------------------------------------------------------------------------------------------------------------------------------------------------------------------------------------------------------------------------------------------------------------------------------------------------------|------------------------------------------|----------------------------------------------------------------------------------------------------------------------|--------------------------|------------------------------|---------------------------------|---------------------------|
| Patient or population: patients with Neuropathic pain                                                                                                                                                                                                                                                          |                                          |                                                                                                                      |                          |                              |                                 |                           |
| Settings:                                                                                                                                                                                                                                                                                                      |                                          |                                                                                                                      |                          |                              |                                 |                           |
| Intervention: Effect of pregabalin on sleep                                                                                                                                                                                                                                                                    |                                          |                                                                                                                      |                          |                              |                                 |                           |
| Outcomes                                                                                                                                                                                                                                                                                                       | Illustrative comparative risks* (95% CI) |                                                                                                                      | Relative effect (95% CI) | No of Participants (studies) | Quality of the evidence (GRADE) | Comments                  |
|                                                                                                                                                                                                                                                                                                                | Assumed risk Control                     | Corresponding risk Effect of pregabalin on sleep                                                                     |                          |                              |                                 |                           |
| Sleep interference                                                                                                                                                                                                                                                                                             |                                          | The mean sleep interference in the intervention groups was <b>0.38 standard deviations lower</b> (0.5 to 0.26 lower) |                          | 1641 (7 studies)             | ⊕⊕⊕⊖ moderate <sup>1</sup>      | SMD -0.38 (-0.5 to -0.26) |
| *The basis for the <b>assumed risk</b> (e.g. the median control group risk across studies) is provided in footnotes. The <b>corresponding risk</b> (and its 95% confidence interval) is based on the assumed risk in the comparison group and the <b>relative effect</b> of the intervention (and its 95% CI). |                                          |                                                                                                                      |                          |                              |                                 |                           |
| CI: Confidence interval; SMD: Standardized mean difference                                                                                                                                                                                                                                                     |                                          |                                                                                                                      |                          |                              |                                 |                           |
| GRADE Working Group grades of evidence                                                                                                                                                                                                                                                                         |                                          |                                                                                                                      |                          |                              |                                 |                           |
| <b>High quality:</b> Further research is very unlikely to change our confidence in the estimate of effect.                                                                                                                                                                                                     |                                          |                                                                                                                      |                          |                              |                                 |                           |
| <b>Moderate quality:</b> Further research is likely to have an important impact on our confidence in the estimate of effect and may change the estimate.                                                                                                                                                       |                                          |                                                                                                                      |                          |                              |                                 |                           |
| <b>Low quality:</b> Further research is very likely to have an important impact on our confidence in the estimate of effect and is likely to change the estimate.                                                                                                                                              |                                          |                                                                                                                      |                          |                              |                                 |                           |
| <b>Very low quality:</b> We are very uncertain about the estimate.                                                                                                                                                                                                                                             |                                          |                                                                                                                      |                          |                              |                                 |                           |
| <sup>1</sup> Selective reporting, authors had financial ties to industry sponsor                                                                                                                                                                                                                               |                                          |                                                                                                                      |                          |                              |                                 |                           |

### **Clinician Global Impression of Change**

Six studies reported this outcome; four of these reported significant improvements with pregabalin compared with placebo, while two found no significant differences between groups (Appendix Table 3).

### **Hospital Anxiety Depression Scores (HADS)**

Four studies were pooled for this outcome. There was no significant difference in HADS-Anxiety scores between groups: SMD -0.12, 95% CI -0.29 to 0.04,  $P=0.14$ ,  $I^2=44\%$ ; the quality of the evidence was moderate (SoF Table 4; Figure S16). There was also no significant difference in HADS-Depression scores between groups: SMD -0.06, 95% CI -0.26 to 0.13,  $P=0.54$ ,  $I^2=60\%$ ; the quality of the evidence was low (SoF Table 4; Appendix Table 1 and Figure S17). One study<sup>41</sup> that did not provide sufficient data for statistical pooling reported significant improvement in the HADS-Anxiety scores in favour of pregabalin, but no significant difference in HADS-depression scores between groups (Appendix Table 1). One study<sup>40</sup> measured anxiety using the VAS anxiety scale and reported significant improvements in QOL scores with fixed- and flexible-dose pregabalin compared with placebo ( $P=0.03$  and  $P=0.02$  respectively).

### **Overall discontinuations**

In total, there were 1,203 drop-outs (approximately 20%) in the 28 trials ( $n=5972$ ) that reported the data (Appendix Table 1). There was no significant difference in overall discontinuation rates between groups, RR 1.09 (95% CI 0.93 to 1.28,  $P=0.29$ ,  $I^2=51\%$ ).

| Summary of Findings Table 4: Effect of pregabalin on anxiety and depression scores in patients with neuropathic pain                                                                                                                                                                                           |                                          |                                                                                                                           |                          |                              |                                      |                           |
|----------------------------------------------------------------------------------------------------------------------------------------------------------------------------------------------------------------------------------------------------------------------------------------------------------------|------------------------------------------|---------------------------------------------------------------------------------------------------------------------------|--------------------------|------------------------------|--------------------------------------|---------------------------|
| Patient or population: patients with Neuropathic pain                                                                                                                                                                                                                                                          |                                          |                                                                                                                           |                          |                              |                                      |                           |
| Settings:                                                                                                                                                                                                                                                                                                      |                                          |                                                                                                                           |                          |                              |                                      |                           |
| Intervention: Effect of pregabalin on anxiety and depression                                                                                                                                                                                                                                                   |                                          |                                                                                                                           |                          |                              |                                      |                           |
| Outcomes                                                                                                                                                                                                                                                                                                       | Illustrative comparative risks* (95% CI) |                                                                                                                           | Relative effect (95% CI) | No of Participants (studies) | Quality of the evidence (GRADE)      | Comments                  |
|                                                                                                                                                                                                                                                                                                                | Assumed risk Control                     | Corresponding risk Effect of pregabalin on anxiety and depression                                                         |                          |                              |                                      |                           |
| HADS-Anxiety                                                                                                                                                                                                                                                                                                   |                                          | The mean hads-anxiety in the intervention groups was <b>0.12 standard deviations lower</b> (0.29 lower to 0.04 higher)    |                          | 1041 (4 studies)             | ⊕⊕⊕⊖ <sup>1</sup><br><b>moderate</b> | SMD -0.12 (-0.29 to 0.04) |
| HADS-Depression                                                                                                                                                                                                                                                                                                |                                          | The mean hads-depression in the intervention groups was <b>0.06 standard deviations lower</b> (0.26 lower to 0.13 higher) |                          | 1041 (4 studies)             | ⊕⊕⊖⊖ <sup>1,2</sup><br><b>low</b>    | SMD -0.06 (-0.26 to 0.13) |
| *The basis for the <b>assumed risk</b> (e.g. the median control group risk across studies) is provided in footnotes. The <b>corresponding risk</b> (and its 95% confidence interval) is based on the assumed risk in the comparison group and the <b>relative effect</b> of the intervention (and its 95% CI). |                                          |                                                                                                                           |                          |                              |                                      |                           |
| CI: Confidence interval; HADS: Hospital anxiety and depression scale; SMD: Standardized mean difference                                                                                                                                                                                                        |                                          |                                                                                                                           |                          |                              |                                      |                           |
| GRADE Working Group grades of evidence                                                                                                                                                                                                                                                                         |                                          |                                                                                                                           |                          |                              |                                      |                           |
| <b>High quality:</b> Further research is very unlikely to change our confidence in the estimate of effect.                                                                                                                                                                                                     |                                          |                                                                                                                           |                          |                              |                                      |                           |
| <b>Moderate quality:</b> Further research is likely to have an important impact on our confidence in the estimate of effect and may change the estimate.                                                                                                                                                       |                                          |                                                                                                                           |                          |                              |                                      |                           |
| <b>Low quality:</b> Further research is very likely to have an important impact on our confidence in the estimate of effect and is likely to change the estimate.                                                                                                                                              |                                          |                                                                                                                           |                          |                              |                                      |                           |
| <b>Very low quality:</b> We are very uncertain about the estimate.                                                                                                                                                                                                                                             |                                          |                                                                                                                           |                          |                              |                                      |                           |
| <sup>1</sup> Selective reporting, authors had financial ties to industry sponsor                                                                                                                                                                                                                               |                                          |                                                                                                                           |                          |                              |                                      |                           |
| <sup>2</sup> Moderate heterogeneity                                                                                                                                                                                                                                                                            |                                          |                                                                                                                           |                          |                              |                                      |                           |

## DISCUSSION

### Summary of the evidence

The evidence from published RCTs suggests that pregabalin reduces pain scores in patients with neuropathic pain. The effect is significant in peripheral neuropathic pain, but does not achieve statistical significance with central neuropathic pain ( $P=0.08$ ). Pregabalin significantly increases the risk of adverse events including weight gain, somnolence, dizziness, dry mouth, peripheral oedema, fatigue, visual disturbances, ataxia, non-peripheral oedema, vertigo and euphoria. Pregabalin significantly reduces sleep interference scores compared with placebo. There was insufficient evidence to assess an effect on quality of life. The evidence for PGIC and CGIC scores was mixed among studies that reported these outcomes and there was no significant effects on HADS anxiety and depression scores compared with placebo. There were five deaths in the pregabalin arms and one in the placebo, but insufficient power to detect an overall effect.

### Comparison with the existing literature

We have identified several published reviews assessing the effectiveness of pregabalin the management of neuropathic pain, and our results are partly consistent with these. Zhang et al<sup>45</sup> and Wang et al<sup>46</sup> showed that pregabalin was more efficacious than placebo for treatment of DPN-associated pain and PHN-associated pain respectively; however, the two reviews did not base their results on changes from baseline between groups. Semel et al<sup>47</sup> and Freeman et al<sup>48</sup> also concluded that pregabalin was more effective than placebo for neuropathic pain; however, both reviews did not account for the quality of the included primary studies. Finnerup et al<sup>49</sup> concluded that there was modest evidence supporting the use of pregabalin for treatment of neuropathic pain; however, the authors used GRADE criteria to assess the strength of recommendation but not the quality of the evidence. In an overview of Cochrane

1  
2  
3 reviews, Wiffen et al<sup>50</sup> concluded that there was clinical trial evidence supporting the use of  
4 pregabalin for treatment of some aspects of neuropathic pain; however, the authors did not  
5 rate the quality of the evidence for the outcomes reported.  
6  
7  
8  
9

10  
11 Two reviews<sup>51,52</sup> that examined the safety profile of pregabalin concluded that pregabalin use  
12 was significantly more associated with adverse events than placebo; however, both reviews  
13 did not rate the quality of the evidence for the outcomes reported  
14  
15  
16  
17  
18  
19

### 20 **Comparison with existing guidelines**

21  
22 We identified several guidelines that recommend the use of pregabalin for treatment of  
23 neuropathic pain, and some of their specifications are consistent with our results. For  
24 instance, the European Federation of Neurological Societies (EFNS) guideline<sup>53</sup> based on  
25 data from comparative studies recommended pregabalin as first line treatment for neuropathic  
26 pain; however, the guidance assessed only the level, but not the quality, of the evidence; and  
27 also notes that there are too few large scale comparative studies to make definite conclusions  
28 about the benefits and harms. Similarly, the American Academy of Neurology, the American  
29 Association of Neuromuscular and Electrodiagnostic Medicine, and the American Academy  
30 of Physical Medicine and Rehabilitation guidance<sup>54</sup> recommends pregabalin as first line  
31 treatment based on levels (and not quality) of the evidence; however, they guidance  
32 recommends that clinical trials of longer duration should be conducted. The Canadian Pain  
33 Society (CPS) guidance<sup>55</sup> recommends pregabalin as first-line treatment for neuropathic pain,  
34 but acknowledges that paucity of longer-duration trials limit the conclusions that can be  
35 drawn about its benefits and harms on the long-term.  
36  
37  
38  
39  
40  
41  
42  
43  
44  
45  
46  
47  
48  
49  
50  
51  
52  
53  
54  
55  
56  
57  
58  
59  
60

### Strengths and limitations

This rapid review has limitations due to its streamlined methods and search strategy. Firstly, the lack of a published a priori protocol could have introduced selective outcome reporting bias in this rapid review; nevertheless, most of the outcomes reported in this review have been listed as outcomes of interest to be considered when designing trials of neuropathic pain interventions.<sup>56</sup> There is a risk that our review may be prone to sampling bias, and that we may have missed potentially eligible studies, which could have been identified by searching clinical trials registries and grey literature. However, we undertook the same rigorous approach using Cochrane criteria for other systematic reviews within the time constraints. It has also been reported that generally the conclusions of rapid reviews and full reviews do not greatly differ<sup>57</sup>; and enhanced rapid reviews where data is independently checked by a second reviewer could help policy makers with quicker access to the evidence base.<sup>58</sup> This review therefore provides the most up to date comprehensive summary of the available literature, as it accounts for study quality and reports clinically meaningful patient outcomes. We did not assess the extent to which different doses of pregabalin influenced the outcomes assessed.

### Implications for research

The quality of the included studies examining efficacy of pregabalin for pain was rated as low or very low according to the GRADE framework. This highlights the need for larger, robust, high-quality clinical trials to be conducted, with particular attention paid to minimizing selective reporting of outcomes. Concerns about selective reporting could be mitigated if drug manufacturers enabled access to clinical study reports (CSRs), especially as industry-sponsored trials are likely to skew reports in favour of benefits over harms.<sup>59,60</sup> This would allow for a more comprehensive assessment of the benefits and harms of pregabalin. Of note, all the included trials were industry-sponsored, and an overwhelming majority of the



1  
2  
3 authors of the include studies had financial ties to the pharmaceutical industry. Of note, the  
4  
5 results of the only published charity-funded phase IV placebo-controlled trial that assessed  
6  
7 the effectiveness of pregabalin in management of neuropathic (radicular) pain contrast our  
8  
9 meta-analysis results – there was no significant difference in pain scores between groups.<sup>61</sup>  
10  
11 Independent and publicly funded trials assessing the benefits and harms of pregabalin should  
12  
13 be conducted. Only a few studies assessed the effect of pregabalin in improving quality of  
14  
15 life, anxiety and depression and CGIC. Future trials should further assess the role of  
16  
17 pregabalin for these outcomes. Studies investigating the type of neuropathic pain pregabalin  
18  
19 relieves (e.g. stimulus-dependent pain such as hyperalgesia or allodynia), or spontaneous pain  
20  
21 could be an area of consideration for future research.  
22  
23  
24  
25

26  
27 That the median duration of intervention was nine weeks suggests that the intermediate to  
28  
29 longer term benefits of pregabalin for neuropathic pain are unproven. Indeed in real life  
30  
31 clinical care, it has been reported that the initial benefits seen with use of the drug in patients  
32  
33 with neuropathic pain were no longer apparent after 6 to 12 months of therapy.<sup>62</sup> Therefore,  
34  
35 RCTs that are adequately powered, and with longer durations of interventions are desirable.  
36  
37 The finding of 5 deaths among 891 participants on pregabalin, vs 1 death among 320  
38  
39 participants on placebo, is somewhat concerning. Given the low frequency of this outcome  
40  
41 (coupled with the short trial durations), RCTs are unlikely to be informative; we suggest  
42  
43 pharmacoepidemiological studies in routinely collected electronic health records and  
44  
45 spontaneous reporting databases to assess the impact of pregabalin on mortality.  
46  
47  
48  
49

### 50 **Implications for clinical practice**

51  
52 Very low-to-moderate quality evidence suggests that pregabalin improves some symptoms of  
53  
54 neuropathic pain. However, it significantly increases the risk of adverse events including  
55  
56  
57  
58  
59

1  
2  
3 somnolence, oedema, visual disturbances, ataxia, vertigo and euphoria. Pregabalin also  
4 increases the risk of drug discontinuation because of adverse events. Clinicians should be  
5 cautious about prescribing pregabalin, and should consider whether its benefits outweigh  
6 potential harms in individual patients.  
7  
8  
9  
10

## 11 12 13 **Conclusions**

14  
15 The evidence from RCTs in journal publications suggests that pregabalin has beneficial  
16 effects on some symptoms of neuropathic pain. However, its use significantly increases the  
17 risk of adverse events and discontinuation due to adverse events. The quality of the evidence  
18 from journal publications is overall low, and the duration of trials is short. Greater  
19 transparency in the reporting of outcomes is advocated; independent and publicly funded  
20 trials assessing the effects of pregabalin in neuropathic pain should be encouraged. Allowing  
21 researchers access to full CSRs of pregabalin trials should be a priority for drug companies  
22 and regulators.  
23  
24  
25  
26  
27  
28  
29  
30  
31  
32  
33  
34

## 35 **Acknowledgement**

36 IJO, BG and CJH are part of the Evidence Synthesis Working Group. The Evidence  
37 Synthesis Working Group is funded by the National Institute for Health Research School for  
38 Primary Care Research (NIHR SPCR) [ProjectNumber 390]. JL is supported by an NIHR In  
39 Practice Fellowship. The views expressed are those of the author(s) and not necessarily those  
40 of the NIHR, the NHS or the Department of Health.  
41  
42  
43  
44  
45

## 46 **Funding**

47 None  
48  
49  
50

## 51 **Data sharing statement**

52 No additional data available  
53  
54  
55  
56  
57  
58  
59  
60

### Authors' Contribution

IJO was involved with devising the review methods, conducting electronic searches, screening of abstracts, data extraction, data analysis and interpretation, and co-drafting of the review. ETT was involved with devising the review methods, screening of abstracts, data extraction, data analysis and interpretation, and co-drafting of the review. JL was involved with data extraction, data analysis and interpretation, and co-drafting of the review. BG was involved with devising the review methods, data analysis and interpretation, and co-drafting of the review. CJH was involved with devising the review methods, data analysis and interpretation, and co-drafting of the review.

### Copyright/license for publication

The Corresponding Author has the right to grant on behalf of all authors and does grant on behalf of all authors, a worldwide licence to the Publishers and its licensees in perpetuity, in all forms, formats and media (whether known now or created in the future), to i) publish, reproduce, distribute, display and store the Contribution, ii) translate the Contribution into other languages, create adaptations, reprints, include within collections and create summaries, extracts and/or, abstracts of the Contribution, iii) create any other derivative work(s) based on the Contribution, iv) to exploit all subsidiary rights in the Contribution, v) the inclusion of electronic links from the Contribution to third party material where-ever it may be located; and, vi) licence any third party to do any or all of the above.

### Competing interests

All authors have completed the ICMJE uniform disclosure form at [http://www.icmje.org/coi\\_disclosure.pdf](http://www.icmje.org/coi_disclosure.pdf) (available on request from the corresponding author). CJH has received expenses and fees for his media work. He has received expenses from the WHO, FDA, and holds grant funding from the NIHR, the NIHR School of Primary Care Research, The Wellcome Trust and the WHO. He has received financial remuneration from an asbestos case. He has also received income from the publication of a series of toolkit books published by Blackwells. On occasion, he receives expenses for teaching EBM and is also paid for his GP work in NHS out of hours. CEBM jointly runs the EvidenceLive Conference with the BMJ and the Overdiagnosis Conference with some international partners which are based on a non-profit making model. BG receives funding from the Laura and John Arnold Foundation and reports personal fees from intermittent additional personal income

1  
2  
3 from speaking and writing for lay audiences on problems in science and medicine including  
4 regulatory shortcomings. IJO, ETT and JL have no interests to disclose.  
5  
6

7  
8 **Transparency declaration**

9 The lead author (the manuscript's guarantor) affirms that the manuscript is an honest,  
10 accurate, and transparent account of the study being reported; that no important aspects of the  
11 study have been omitted; and that any discrepancies from the study as planned (and, if  
12 relevant, registered) have been explained.  
13  
14  
15  
16  
17  
18  
19  
20  
21  
22  
23  
24  
25  
26  
27  
28  
29  
30  
31  
32  
33  
34  
35  
36  
37  
38  
39  
40  
41  
42  
43  
44  
45  
46  
47  
48  
49  
50  
51  
52  
53  
54  
55  
56  
57  
58  
59  
60

## REFERENCES

- 1 Verma V, Singh N, Singh Jaggi A. Pregabalin in neuropathic pain: evidences and possible mechanisms. *Curr Neuropharmacol*. 2014 Jan;12(1):44-56.
- 2 Taylor CP, Angelotti T, Fauman E. Pharmacology and mechanism of action of pregabalin: the calcium channel alpha2-delta (alpha2-delta) subunit as a target for antiepileptic drug discovery. *Epilepsy Res*. 2007 Feb;73(2):137-50
- 3 Goodman CW, Brett AS. Gabapentin and Pregabalin for Pain - Is Increased Prescribing a Cause for Concern? *N Engl J Med*. 2017 Aug 3;377(5):411-414.
- 4 Spence D. Bad medicine: gabapentin and pregabalin. *BMJ*. 2013 Nov 8;347:f6747. doi: 10.1136/bmj.f6747.
- 5 OpenPrescribing.net. High-level prescribing trends for Pregabalin (BNF code 0408010AE) across all GP practices in NHS England, since August 2010. Available at: <https://openprescribing.net/chemical/0408010AE/> [Last accessed 8th March, 2018]
- 6 Wang Y, Yang H, Shen C, Luo J. Morphine and pregabalin in the treatment of neuropathic pain. *Exp Ther Med*. 2017 Apr;13(4):1393-1397.
- 7 Lyndon A, Audrey S, Wells C, et al. Risk to heroin users of polydrug use of pregabalin or gabapentin. *Addiction*. 2017 Sep;112(9):1580-1589
- 8 Morrison EE, Sandilands EA, Webb DJ. Gabapentin and pregabalin: do the benefits outweigh the harms? *J R Coll Physicians Edinb* 2017; 47: 310–3
- 9 Iacobucci G. UK government to reclassify pregabalin and gabapentin after rise in deaths. *BMJ*. 2017 Sep 25;358:j4441. doi: 10.1136/bmj.j4441.
- 10 International Association for the Study of Pain. What is neuropathic pain? <https://s3.amazonaws.com/rdcms-iasp/files/production/public/AM/Images/GYAP/What%20is%20Neuropathic%20Pain.pdf> [Accessed 19th January, 2018]

- 
- 1  
2  
3  
4 11 Sullivan GM. A Primer on the Validity of Assessment Instruments. *J Grad Med Educ*.  
5  
6 2011 Jun;3(2):119-20.  
7
- 8 12 Higgins JP, Altman DG, Gøtzsche PC, et al. The Cochrane Collaboration's tool for  
9  
10 assessing risk of bias in randomised trials. *Br Med J* 2011; 343: d5928–d5928  
11
- 12 13 Review Manager (RevMan) (Computer program). Version 5.3. Copenhagen: The Nordic  
13  
14 Cochrane Centre, The Cochrane Collaboration, 2011  
15
- 16 14 Furukawa TA, Barbui C, Cipriani A, Brambilla P, Watanabe N. Imputing missing  
17  
18 standard deviations in meta-analyses can provide accurate results. *J Clin Epidemiol*. 2006  
19  
20 Jan;59(1):7-10.  
21
- 22 15 GRADEpro. Computer program on [www.gradepr.org](http://www.gradepr.org). Version 3.6. McMaster  
23  
24 University, 2014.  
25
- 26 16 GRADE Working Group. Grading quality of evidence and strength of recommendations.  
27  
28 *BMJ* 2004; 328(7454): 1490.  
29
- 30 17 Arezzo JC, Rosenstock J, Lamoreaux L, Pauer L. Efficacy and safety of pregabalin 600  
31  
32 mg/d for treating painful diabetic peripheral neuropathy: a double-blind placebo-controlled  
33  
34 trial. *BMC Neurol*. 2008 Sep 16;8:33. doi: 10.1186/1471-2377-8-33.  
35
- 36 18 Cardenas DD, Nieshoff EC, Suda K, et al. A randomized trial of pregabalin in patients  
37  
38 with neuropathic pain due to spinal cord injury. *Neurology*. 2013 Feb 5;80(6):533-9.  
39
- 40 19 Dworkin RH, Corbin AE, Young JP Jr, et al. Pregabalin for the treatment of postherpetic  
41  
42 neuralgia: a randomized, placebo-controlled trial. *Neurology*. 2003 Apr 22;60(8):1274-83.  
43
- 44 20 Freynhagen R, Strojek K, Griesing T, Whalen E, Balkenohl M. Efficacy of pregabalin in  
45  
46 neuropathic pain evaluated in a 12-week, randomised, double-blind, multicentre, placebo-  
47  
48 controlled trial of flexible- and fixed-dose regimens. *Pain*. 2005 Jun;115(3):254-63.  
49  
50  
51  
52  
53  
54  
55  
56  
57  
58  
59  
60

- 1  
2  
3  
4 21 Guan Y, Ding X, Cheng Y, et al. Efficacy of pregabalin for peripheral neuropathic pain:  
5 results of an 8-week, flexible-dose, double-blind, placebo-controlled study conducted in  
6 China. *Clin Ther*. 2011 Feb;33(2):159-66  
7  
8  
9  
10 22 Holbech JV, Bach FW, Finnerup NB, Brøsen K, Jensen TS, Sindrup SH. Imipramine and  
11 pregabalin combination for painful polyneuropathy: a randomized controlled trial. *Pain*.  
12 2015 May;156(5):958-66  
13  
14  
15 23 Huffman CL, Goldenberg JN, Weintraub J, et al. Efficacy and Safety of Once-Daily  
16 Controlled-Release Pregabalin for the Treatment of Patients With Postherpetic Neuralgia:  
17 A Double-Blind, Enriched Enrollment Randomized Withdrawal, Placebo-Controlled Trial.  
18 *Clin J Pain*. 2017 Jul;33(7):569-578.  
19  
20  
21  
22  
23 24 Kanodia SK, Singhal KC. A study on efficacy of Pregabalin in acute Herpetic Neuralgia.  
24 *Ann Neurosci*. 2011 Oct;18(4):148-50.  
25  
26  
27 25 Kim JS, Bashford G, Murphy TK, Martin A, Dror V, Cheung R. Safety and efficacy of  
28 pregabalin in patients with central post-stroke pain. *Pain*. 2011 May;152(5):1018-23.  
29  
30  
31  
32 26 Krcevski Skvarc N, Kamenik M. Effects of pregabalin on acute herpetic pain and  
33 postherpetic neuralgia incidence. *Wien Klin Wochenschr*. 2010 May;122 Suppl 2:49-53  
34  
35  
36 27 Lesser H, Sharma U, LaMoreaux L, Poole RM. Pregabalin relieves symptoms of painful  
37 diabetic neuropathy: a randomized controlled trial. *Neurology*. 2004 Dec 14;63(11):2104-  
38 10.  
39  
40  
41  
42 28 Liu Q, Chen H, Xi L, et al. A Randomized, Double-blind, Placebo-controlled Trial to  
43 Evaluate the Efficacy and Safety of Pregabalin for Postherpetic Neuralgia in a Population  
44 of Chinese Patients. *Pain Pract*. 2017 Jan;17(1):62-69.  
45  
46  
47  
48 29 Mathieson S, Maher CG, McLachlan AJ, et al. Trial of Pregabalin for Acute and Chronic  
49 Sciatica. *N Engl J Med*. 2017 Mar 23;376(12):1111-1120.  
50  
51  
52  
53  
54  
55  
56  
57  
58  
59  
60

- 
- 1  
2  
3  
4 30 Moon DE, Lee DI, Lee SC, et al. Efficacy and tolerability of pregabalin using a flexible,  
5  
6 optimized dose schedule in Korean patients with peripheral neuropathic pain: a 10-week,  
7  
8 randomized, double-blind, placebo-controlled, multicenter study. *Clin Ther*. 2010  
9  
10 Dec;32(14):2370-85.  
11
- 12 31 Rauck R, Makumi CW, Schwartz S, et al. A randomized, controlled trial of gabapentin  
13  
14 enacarbil in subjects with neuropathic pain associated with diabetic peripheral neuropathy.  
15  
16 *Pain Pract*. 2013 Jul;13(6):485-96.  
17
- 18 32 Richter RW, Portenoy R, Sharma U, Lamoreaux L, Bockbrader H, Knapp LE. Relief of  
19  
20 painful diabetic peripheral neuropathy with pregabalin: a randomized, placebo-controlled  
21  
22 trial. *J Pain*. 2005 Apr;6(4):253-60.  
23
- 24 33 Rosenstock J, Tuchman M, LaMoreaux L, Sharma U. Pregabalin for the treatment of  
25  
26 painful diabetic peripheral neuropathy: a double-blind, placebo-controlled trial. *Pain*. 2004  
27  
28 Aug;110(3):628-38.  
29
- 30 34 Sabatowski R, Gálvez R, Cherry DA, et al. Pregabalin reduces pain and improves sleep  
31  
32 and mood disturbances in patients with post-herpetic neuralgia: results of a randomised,  
33  
34 placebo-controlled clinical trial. *Pain*. 2004 May;109(1-2):26-35.  
35
- 36 35 Satoh J, Yagihashi S, Baba M, et al. Efficacy and safety of pregabalin for treating  
37  
38 neuropathic pain associated with diabetic peripheral neuropathy: a 14 week, randomized,  
39  
40 double-blind, placebo-controlled trial. *Diabet Med*. 2011 Jan;28(1):109-16.  
41  
42
- 43 36 Shabbir B, Shafi F, Mahboob F. Amitriptyline Vs Pregabalin in Painful Diabetic  
44  
45 Neuropathy A Randomised Placebo-Based Study. *P J M H S* 2011; 5(4): 745-747  
46  
47
- 48 37 Siddall PJ, Cousins MJ, Otte A, Griesing T, Chambers R, Murphy TK. Pregabalin in  
49  
50 central neuropathic pain associated with spinal cord injury: a placebo-controlled trial.  
51  
52 *Neurology*. 2006 Nov 28;67(10):1792-800.  
53  
54  
55  
56  
57  
58  
59  
60



- 1  
2  
3  
4 38 Simpson DM, Schifitto G, Clifford DB, et al. Pregabalin for painful HIV neuropathy: a  
5  
6 randomized, double-blind, placebo-controlled trial. *Neurology*. 2010 Feb 2;74(5):413-20.  
7
- 8 39 Simpson DM, Rice AS, Emir B, Landen J, Semel D, Chew ML, Sporn J. A randomized,  
9  
10 double-blind, placebo-controlled trial and open-label extension study to evaluate the  
11  
12 efficacy and safety of pregabalin in the treatment of neuropathic pain associated with  
13  
14 human immunodeficiency virus neuropathy. *Pain*. 2014 Oct;155(10):1943-54.  
15
- 16 40 Stacey BR, Barrett JA, Whalen E, Phillips KF, Rowbotham MC. Pregabalin for  
17  
18 postherpetic neuralgia: placebo-controlled trial of fixed and flexible dosing regimens on  
19  
20 allodynia and time to onset of pain relief. *J Pain*. 2008 Nov;9(11):1006-17  
21  
22
- 23 41 Tölle T, Freynhagen R, Versavel M, Trostmann U, Young JP Jr. Pregabalin for relief of  
24  
25 neuropathic pain associated with diabetic neuropathy: a randomized, double-blind study.  
26  
27 *Eur J Pain*. 2008 Feb;12(2):203-13.  
28
- 29 42 van Seventer R, Feister HA, Young JP Jr, Stoker M, Versavel M, Rigaudy L. Efficacy and  
30  
31 tolerability of twice-daily pregabalin for treating pain and related sleep interference in  
32  
33 postherpetic neuralgia: a 13-week, randomized trial. *Curr Med Res Opin*. 2006  
34  
35 Feb;22(2):375-84.  
36  
37
- 38 43 van Seventer R, Bach FW, Toth CC, Serpell M, Temple J, Murphy TK, Nimour M.  
39  
40 Pregabalin in the treatment of post-traumatic peripheral neuropathic pain: a randomized  
41  
42 double-blind trial. *Eur J Neurol*. 2010 Aug;17(8):1082-9.  
43  
44
- 45 44 Vranken JH, Dijkgraaf MG, Kruis MR, van der Vegt MH, Hollmann MW, Heesen M.  
46  
47 Pregabalin in patients with central neuropathic pain: a randomized, double-blind, placebo-  
48  
49 controlled trial of a flexible-dose regimen. *Pain*. 2008 May;136(1-2):150-7.  
50
- 51 47. Watt A, Cameron A, Sturm L, Lathlean T, Babidge W, Blamey S. Rapid versus full  
52  
53 systematic reviews: validity in clinical practice? *ANZ J Surg* 2008. 78:1037-40.  
54  
55  
56  
57  
58  
59  
60

- 
- 1  
2  
3  
4 45 Zhang SS, Wu Z, Zhang LC, et al. Efficacy and safety of pregabalin for treating painful  
5  
6 diabetic peripheral neuropathy: a meta-analysis. *Acta Anaesthesiol Scand*. 2015  
7  
8 Feb;59(2):147-59.  
9
- 10 46 Wang SL, Wang H, Nie HY, Bu G, Shen XD, Wang H. The efficacy of pregabalin for  
11  
12 acute pain control in herpetic neuralgia patients: A meta-analysis. *Medicine (Baltimore)*.  
13  
14 2017 Dec;96(51):e9167.  
15
- 16 47 Semel D, Murphy TK, Zlateva G, Cheung R, Emir B. Evaluation of the safety and  
17  
18 efficacy of pregabalin in older patients with neuropathic pain: results from a pooled  
19  
20 analysis of 11 clinical studies. *BMC Fam Pract*. 2010 Nov 5;11:85. doi: 10.1186/1471-  
21  
22 2296-11-85.  
23
- 24 48 Freeman R, Durso-Decruz E, Emir B. Efficacy, safety, and tolerability of pregabalin  
25  
26 treatment for painful diabetic peripheral neuropathy: findings from seven randomized,  
27  
28 controlled trials across a range of doses. *Diabetes Care*. 2008 Jul;31(7):1448-54.  
29
- 30 49 Finnerup NB, Attal N, Haroutounian S, et al. Pharmacotherapy for neuropathic pain in  
31  
32 adults: a systematic review and meta-analysis. *Lancet Neurol*. 2015 Feb;14(2):162-73.  
33  
34
- 35 50 Wiffen PJ, Derry S, Moore RA, et al. Antiepileptic drugs for neuropathic pain and  
36  
37 fibromyalgia - an overview of Cochrane reviews. *Cochrane Database Syst Rev*. 2013 Nov  
38  
39 11;(11):CD010567.  
40
- 41 51 Zaccara G, Gangemi P, Perucca P, Specchio L. The adverse event profile of pregabalin: a  
42  
43 systematic review and meta-analysis of randomized controlled trials. *Epilepsia*. 2011  
44  
45 Apr;52(4):826-36.  
46
- 47 52 Freynhagen R, Serpell M, Emir B, et al. A comprehensive drug safety evaluation of  
48  
49 pregabalin in peripheral neuropathic pain. *Pain Pract*. 2015 Jan;15(1):47-57.  
50
- 51 53 Attal N, Cruccu G, Baron R, et al. EFNS guidelines on the pharmacological treatment of  
52  
53 neuropathic pain: 2010 revision. *Eur J Neurol*. 2010 Sep;17(9):1113-e88.  
54  
55  
56  
57  
58  
59  
60

- 1  
2  
3  
4 54 Bril V, England J, Franklin GM, et al. Evidence-based guideline: Treatment of painful  
5  
6 diabetic neuropathy: report of the American Academy of Neurology, the American  
7  
8 Association of Neuromuscular and Electrodiagnostic Medicine, and the American  
9  
10 Academy of Physical Medicine and Rehabilitation. *Neurology*. 2011 May 17;76(20):1758-  
11  
12 65.
- 13  
14  
15 55 Moulin D, Boulanger A, Clark AJ, Clarke H, Dao T, Finley GA, et al. Pharmacological  
16  
17 management of chronic neuropathic pain: revised consensus statement from the Canadian  
18  
19 Pain Society. *Pain Res Manag*. 2014 Nov-Dec;19(6):328-35.
- 20  
21 56 Gilron I. Methodological issues associated with clinical trials in neuropathic pain. *Expert*  
22  
23 *Rev Clin Pharmacol*. 2016 Nov;9(11):1399-1402
- 24  
25 57 Ganann R, Ciliska D, Thomas H. Expediting systematic reviews: methods and  
26  
27 implications of rapid reviews. *Implement Sci*. 2010 Jul 19;5:56. doi: 10.1186/1748-5908-  
28  
29 5-56.
- 30  
31  
32 58 Taylor-Phillips S, Geppert J, Stinton C, et al. Comparison of a full systematic review  
33  
34 versus rapid review approaches to assess a newborn screening test for tyrosinemia type 1.  
35  
36 *Res Synth Methods*. 2017 Dec;8(4):475-484.
- 37  
38 59 Flacco ME, Manzoli L, Boccia S, et al. Head-to-head randomized trials are mostly  
39  
40 industry sponsored and almost always favor the industry sponsor. *J Clin Epidemiol*. 2015  
41  
42 Jul;68(7):811-20.
- 43  
44  
45 60 Lundh A, Lexchin J, Mintzes B, Schroll JB, Bero L. Industry sponsorship and research  
46  
47 outcome. *Cochrane Database Syst Rev*. 2017 Feb 16;2:MR000033.
- 48  
49 61 Malik KM, Nelson AM, Avram MJ, Robak SL, Benzoni HT. Efficacy of Pregabalin in the  
50  
51 Treatment of Radicular Pain: Results of a Controlled Trial. *Anesth Pain Med*. 2015 Aug  
52  
53 22;5(4):e28110.
- 54  
55  
56  
57  
58  
59  
60

1  
2  
3  
4 62 NHS Gloucestershire. Guidance for Review of Patients taking Pregabalin for Neuropathic

5  
6 Pain. Available at:

7  
8 [http://www.gloshospitals.nhs.uk/SharePoint19/Chronic%20and%20Acute%20Pain%20Ser](http://www.gloshospitals.nhs.uk/SharePoint19/Chronic%20and%20Acute%20Pain%20Services%20Web%20Documents/Pregabalin%20review%20(neuropathic%20pain)%20mg%204%20(2).pdf)  
9  
10 [vices%20Web%20Documents/Pregabalin%20review%20\(neuropathic%20pain\)%20mg%](http://www.gloshospitals.nhs.uk/SharePoint19/Chronic%20and%20Acute%20Pain%20Services%20Web%20Documents/Pregabalin%20review%20(neuropathic%20pain)%20mg%204%20(2).pdf)  
11 [204%20\(2\).pdf](http://www.gloshospitals.nhs.uk/SharePoint19/Chronic%20and%20Acute%20Pain%20Services%20Web%20Documents/Pregabalin%20review%20(neuropathic%20pain)%20mg%204%20(2).pdf) [Last accessed 1st March, 2018].  
12  
13  
14  
15  
16  
17  
18  
19  
20  
21  
22  
23  
24  
25  
26  
27  
28  
29  
30  
31  
32  
33  
34  
35  
36  
37  
38  
39  
40  
41  
42  
43  
44  
45  
46  
47  
48  
49  
50  
51  
52  
53  
54  
55  
56  
57  
58  
59  
60

---

**Figure legends**

**Figure 1:** Flow chart showing the process for inclusion of RCTs assessing the effects of pregabalin in the management of neuropathic pain

**Figure 2a:** Graphical representation of the risk of bias in RCTs assessing the effects of pregabalin in the management of neuropathic pain

**Figure 2b:** Risk of bias summary for RCTs assessing the effects of pregabalin in the management of neuropathic pain

**Figure 3:** Effect of pregabalin on pain scores in patients with neuropathic pain

**Figure 4:** Effect of pregabalin on the risk of adverse events in patients with neuropathic pain

**Figure 1: Flow chart showing the process for inclusion of RCTs assessing the effects of pregabalin in the management of neuropathic pain**

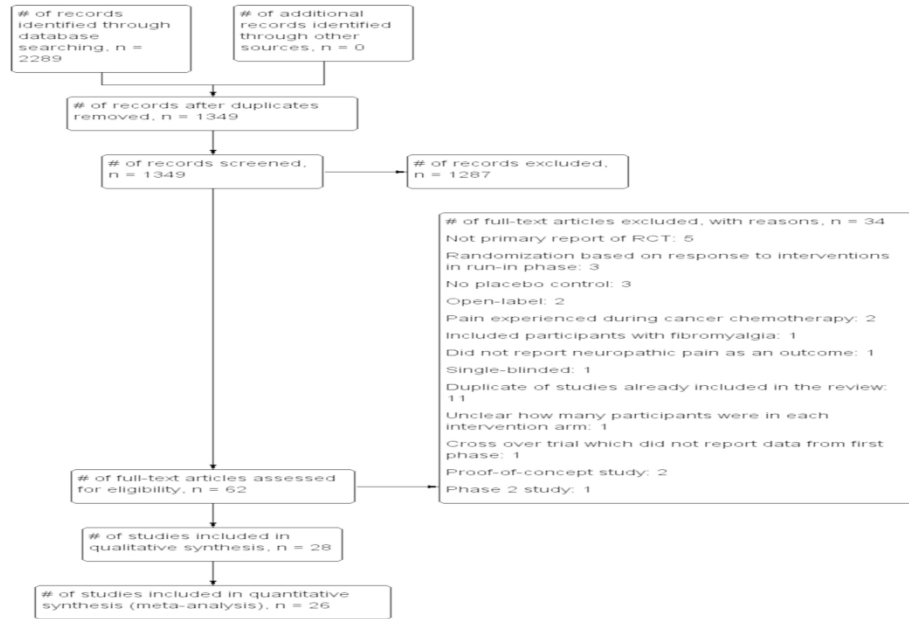

254x190mm (300 x 300 DPI)

Figure 2a: Graphical representation of the risk of bias in RCTs assessing the effects of pregabalin in the management of neuropathic pain

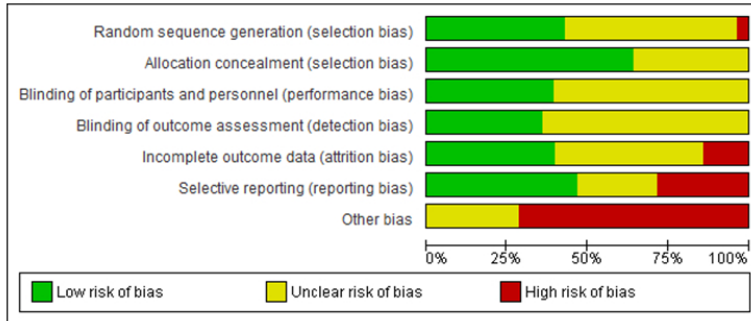

Figure 2b: Risk of bias summary for RCTs assessing the effects of pregabalin in the management of neuropathic pain

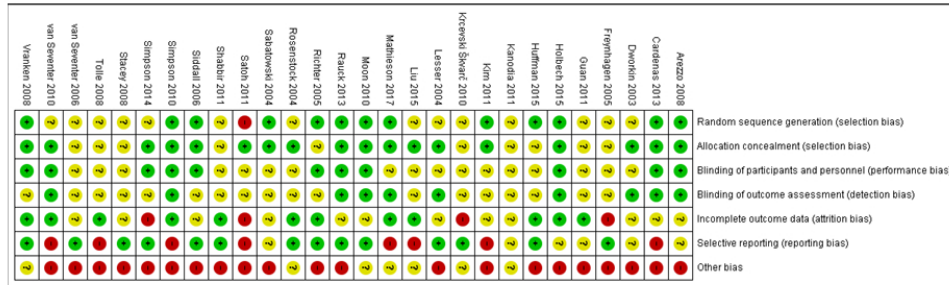

254x190mm (96 x 96 DPI)

**Figure 3: Effect of pregabalin on pain scores in patients with neuropathic pain**

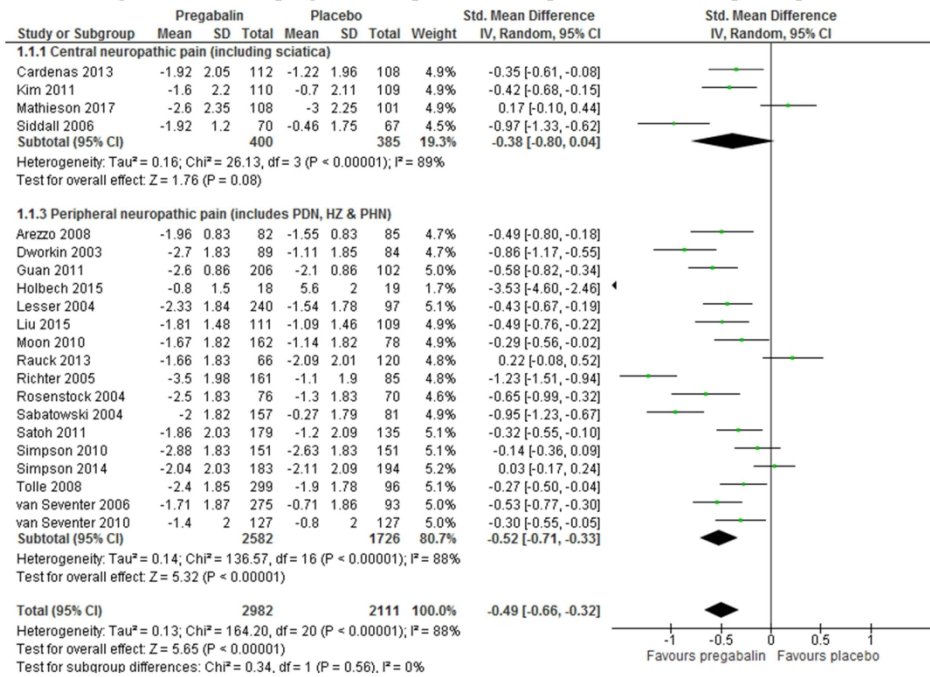

254x190mm (300 x 300 DPI)



**Figure 4: Effect of pregabalin on the risk of adverse events in patients with neuropathic pain**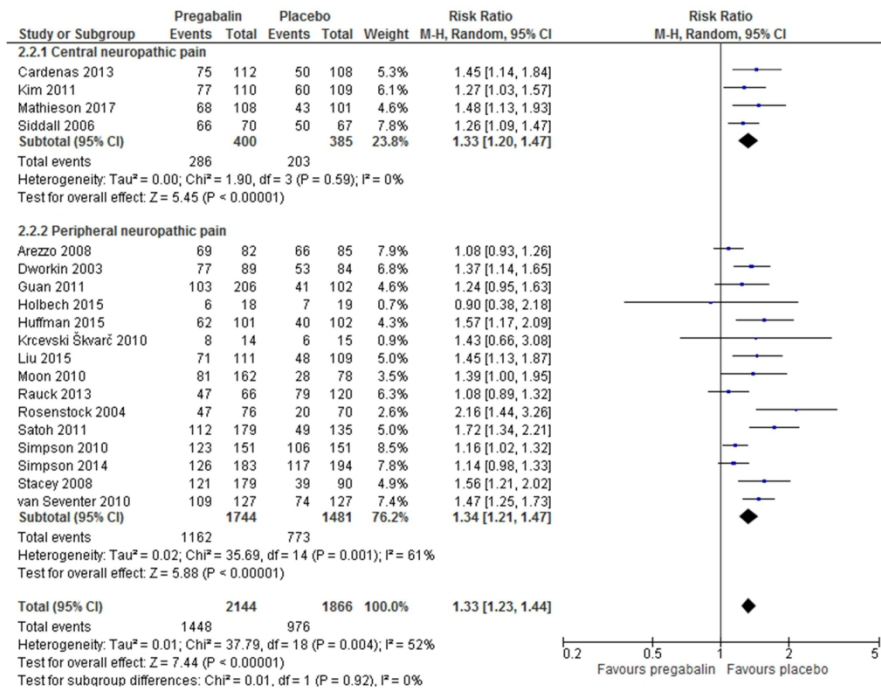

254x190mm (300 x 300 DPI)

**Appendix Table 1: Benefits and harms of pregabalin in the management of neuropathic pain**

| Outcome                                        | Overall analysis                                                        | Subgroup analyses                                                      |                                                                          | Test for subgroup differences   |
|------------------------------------------------|-------------------------------------------------------------------------|------------------------------------------------------------------------|--------------------------------------------------------------------------|---------------------------------|
|                                                |                                                                         | Central neuropathic pain                                               | Peripheral neuropathic pain                                              |                                 |
| Mean change in pain scores - NRS               | (n = 5093): SMD -0.49 (-0.66 to -0.32, P < 0.00001, I <sup>2</sup> =88% | (n = 785): SMD -0.38 (-0.80 to 0.04), P = 0.08, I <sup>2</sup> =89%    | (n = 4308): SMD -0.52 (-0.71 to -0.33), P < 0.00001, I <sup>2</sup> =88% | P = 0.56, I <sup>2</sup> =0%    |
| Mean change in sleep interference scores - NRS | (n = 1641): SMD -0.38 (-0.50 to -0.26, P < 0.00001, I <sup>2</sup> =32% | (n = 357): SMD -0.49 (-0.70 to -0.28), P < 0.00001, I <sup>2</sup> =0% | (n = 1284): SMD -0.35 (-0.50 to -0.19), P < 0.0001, I <sup>2</sup> =45%  | P = 0.30, I <sup>2</sup> =8%    |
| Mean change in HADS-anxiety scores             | (n = 1041): SMD -0.12 (-0.29 to 0.04, P = 0.14, I <sup>2</sup> =44%     | (n = 418): SMD -0.27 (-0.46 to -0.08, P = 0.006, I <sup>2</sup> =0%    | (n = 623): SMD -0.00 (-0.16 to 0.15, P = 0.97, I <sup>2</sup> =0%        | P = 0.04, I <sup>2</sup> =77.2% |
| Mean change in HADS-depression scores          | (n = 1041): SMD -0.06 (-0.26 to 0.13, P = 0.54, I <sup>2</sup> =60%     | (n = 418): SMD -0.16 (-0.41 to 0.10, P = 0.23, I <sup>2</sup> =44%     | (n = 623): SMD 0.02 (-0.28 to 0.32, P = 0.90, I <sup>2</sup> =71%        | P = 0.38, I <sup>2</sup> =8%    |
| Overall adverse events                         | (n = 4010): RR 1.33 (1.23 to 1.44), P < 0.00001, I <sup>2</sup> =52%    | (n = 489): RR 1.33 (1.20 to 1.47), P < 0.00001, I <sup>2</sup> =0%     | (n = 3225): RR 1.34 (1.21 to 1.47), P < 0.00001, I <sup>2</sup> =61%     | P = 0.92, I <sup>2</sup> =0%    |
| Adverse event: weight gain                     | (n = 3636): RR 4.58, (2.88 to 7.28), P < 0.00001, I <sup>2</sup> =0%    | (n = 428): RR 3.77 (0.94 to 15.08), P = 0.06, I <sup>2</sup> =0%       | (n = 3636): RR 4.69 (2.87 to 7.68), P < 0.00001, I <sup>2</sup> =0%      | P = 0.77, I <sup>2</sup> =0%    |
| Adverse event: somnolence                      | (n = 5695): RR 2.84, (2.36 to 3.42), P < 0.00001, I <sup>2</sup> =0%    | (n = 785): RR 3.18 (2.16 to 4.68), P < 0.00001, I <sup>2</sup> =0%     | (n = 4910): RR 2.74 (2.22 to 3.40), P < 0.00001, I <sup>2</sup> =1%      | P = 0.51, I <sup>2</sup> =0%    |
| Adverse event: dizziness                       | (n = 5732): RR 2.94 (2.30 to 3.74), P < 0.00001, I <sup>2</sup> =63%    | (n = 785): RR 3.38 (2.46 to 4.63), P < 0.00001, I <sup>2</sup> =0%     | (n = 4947): RR 2.89 (2.17 to 3.85), P < 0.00001, I <sup>2</sup> =67%     | P = 0.48, I <sup>2</sup> =0%    |
| Adverse event: peripheral edema                | (n = 5001): RR 2.63 (1.86 to 3.73), P < 0.00001, I <sup>2</sup> =41%    | (n = 439): RR 3.90 (1.63 to 9.36), P = 0.002, I <sup>2</sup> =0%       | (n = 4562): RR 2.53 (1.74 to 3.68), P < 0.00001, I <sup>2</sup> =44%     | P = 0.37, I <sup>2</sup> =0%    |
| Adverse event: fatigue*                        | (n = 3958): RR 1.83 (1.32 to 2.54), P = 0.0003, I <sup>2</sup> =14%     | N/A                                                                    | N/A                                                                      | N/A                             |
| Adverse event: visual disturbance              | (n = 2814): RR 2.50 (1.53 to 4.09), P = 0.0003, I <sup>2</sup> =6%      | (n = 566): RR 4.05 (1.27 to 12.91), P = 0.02, I <sup>2</sup> =0%       | (n = 2248): RR 2.36 (1.32 to 4.22), P = 0.004, I <sup>2</sup> =16%       | P = 0.42, I <sup>2</sup> =0%    |
| Adverse event: ataxia**                        | (n = 1045): RR 5.49 (1.84 to 16.36), P = 0.002, I <sup>2</sup> =0%      | N/A                                                                    | N/A                                                                      | N/A                             |
| Adverse event: dry mouth                       | (n = 3873): RR 2.39 (1.66 to 3.44), P < 0.0001, I <sup>2</sup> =16%     | (n = 357): RR 3.75 (1.43 to 9.83), P = 0.007, I <sup>2</sup> =0%       | (n = 3516): RR 2.28 (1.52 to 3.41), P < 0.0001, I <sup>2</sup> =20%      | P = 0.35, I <sup>2</sup> =0%    |
| Adverse event: non-peripheral edema            | (n = 2337): RR 3.51 (1.93 to 6.40), P < 0.0001, I <sup>2</sup> =0%      | (n = 785): RR 3.82 (1.65 to 8.85), P = 0.002, I <sup>2</sup> =0%       | (n = 1552): RR 3.70 (1.36 to 10.06), P = 0.01, I <sup>2</sup> =19%       | P = 0.96, I <sup>2</sup> =0%    |
| Adverse event: vertigo**                       | (n = 1031): RR 3.08 (1.01 to 9.40), P = 0.05, I <sup>2</sup> =30%       | N/A                                                                    | N/A                                                                      | N/A                             |
| Adverse event: euphoria*                       | (n = 1274): RR 8.80 (2.72 to 28.54), P = 0.0003, I <sup>2</sup> =0%     | N/A                                                                    | N/A                                                                      | N/A                             |
| Discontinuation due to adverse events          | (n = 5426): RR 1.91 (1.54 to 2.37), P < 0.00001, I <sup>2</sup> =0%     | (n = 576): RR 1.42 (0.79 to 2.55), P = 0.24, I <sup>2</sup> =0%        | (n = 4850): RR 2.00 (1.58 to 2.55), P < 0.00001, I <sup>2</sup> =6%      | P = 0.29, I <sup>2</sup> =12%   |

Abbreviations: HADS: Hospital anxiety depression scale; NRS: Numerical rating scale; RR: Risk ratio; SMD: Standardized mean difference

\*only one RCT on central neuropathic pain reported adequate data

\*\*all RCTs were in patients with peripheral neuropathic pain

1  
2  
3  
4  
5  
6  
7  
8  
9  
10  
11  
12  
13  
14  
15  
16  
17  
18  
19  
20  
21  
22  
23  
24  
25  
26  
27  
28  
29  
30  
31  
32  
33  
34  
35  
36  
37  
38  
39  
40  
41  
42  
43  
44  
45  
46  
47

For peer review only

1  
2  
3  
4**Appendix Table 2: Sensitivity analyses by study quality and duration in clinical trials assessing the benefits and harms of pregabalin in neuropathic pain**

| Outcome                               | Sensitivity analysis based on higher quality studies*                          | Sensitivity analysis based on shorter duration of intervention**                    | Sensitivity analysis based on longer duration of intervention***                   |
|---------------------------------------|--------------------------------------------------------------------------------|-------------------------------------------------------------------------------------|------------------------------------------------------------------------------------|
| Pain                                  | 5 studies (n = 932): SMD -0.56 (-1.07 to -0.05; P = 0.03; I <sup>2</sup> =92%) | 10 studies (n = 2408): SMD -0.68 (-0.96 to -0.40; P < 0.00001; I <sup>2</sup> =90%) | 10 studies (n = 2685): SMD -0.31 (-0.49 to -0.13; P = 0.0006; I <sup>2</sup> =79%) |
| Adverse events                        | 6 studies (n = 1152): RR 1.17 (1.06 to 1.29; P = 0.002; I <sup>2</sup> =23%)   | 11 studies (n = 2088): RR 1.46 (1.34 to 1.58; P < 0.00001; I <sup>2</sup> =0%)      | 8 studies (n = 1922): RR 1.23 (1.12 to 1.35; P < 0.0001; I <sup>2</sup> =55%)      |
| Serious adverse events                | 3 studies (n = 627): RR 0.59 (0.38 to 0.92; P = 0.02; I <sup>2</sup> =0%)      | 8 studies (n = 2088): RR 0.72 (0.49 to 1.07; P = 0.11; I <sup>2</sup> =0%)          | 7 studies (n = 1674): RR 0.93 (0.55 to 1.59; P = 0.79; I <sup>2</sup> =26%)        |
| Discontinuation due to adverse events | 6 studies (n = 1152): RR 1.22 (0.79 to 1.87; P = 0.37; I <sup>2</sup> =0%)     | 13 studies (n = 2403): RR 1.95 (1.34 to 2.84; P = 0.0005; I <sup>2</sup> =27%)      | 11 studies (n = 3023): RR 1.88 (1.40 to 2.53; P < 0.0001; I <sup>2</sup> =0%)      |

20 Studies that adequately reported randomization and blinding procedures

21 \*Studies duration lasting less than 12 weeks

22 \*\*Studies duration lasting at least 12 weeks

23

24

25

26

27

28

29

30

31

32

33

34

35

36

37

38

39

40

41

42

43

44

45

46

Appendix Table 3: Main results\* of RCTs assessing the benefits and harms of pregabalin in the management of neuropathic pain

| Study ID                                                 | Pain                                                                                                                           |                                                                                             |                                                                                                                | Sleep Disturbance                                                                                                       |                                                                                     | Quality of Life (EQ-5D)                                                                                                                                         | PGIC                                                                                                                                                                                         | CGIC                                                                                    |                                                        |
|----------------------------------------------------------|--------------------------------------------------------------------------------------------------------------------------------|---------------------------------------------------------------------------------------------|----------------------------------------------------------------------------------------------------------------|-------------------------------------------------------------------------------------------------------------------------|-------------------------------------------------------------------------------------|-----------------------------------------------------------------------------------------------------------------------------------------------------------------|----------------------------------------------------------------------------------------------------------------------------------------------------------------------------------------------|-----------------------------------------------------------------------------------------|--------------------------------------------------------|
|                                                          | NRS                                                                                                                            | VAS Score                                                                                   | SF-MPQ VAS                                                                                                     | SF-MPQ PPI                                                                                                              | Sleep Interference Scores                                                           |                                                                                                                                                                 |                                                                                                                                                                                              |                                                                                         | MOS-Sleep                                              |
| 10<br>11<br>12<br>13<br>14<br>15<br>16<br>17<br>18<br>19 |                                                                                                                                |                                                                                             | Significantly favoured PGB over PLA (MD -11.06, 95% CI, -18.89 to -3.22; P = 0.006)                            |                                                                                                                         |                                                                                     |                                                                                                                                                                 | Significant improvement with PGB compared to PLA, P= 0.002                                                                                                                                   |                                                                                         |                                                        |
| 20<br>21<br>22<br>23                                     | Both flexible- and fixed-dose PGB significantly reduced endpoint mean pain score versus PLA (P=0.002 and P<0.001 respectively) |                                                                                             |                                                                                                                |                                                                                                                         | Significantly improved at endpoint in each PGB treatment group over PLA (P<0.001)   | Significantly favoured PGB over PLA (P<0.05)                                                                                                                    | PGIC reported as binary outcome; significantly improved with PGB compared with PLA, P<0.001                                                                                                  | Significant improvement in the PGB arm (P= 0.0294)                                      |                                                        |
| 24<br>25<br>26                                           |                                                                                                                                |                                                                                             | Significantly improved with PGB vs PLA LSMD -6.56, 95% CI -11.65 to -1.47, P=0.012                             |                                                                                                                         | Significantly improved with PGB vs PLA: LSMD -0.5, 95% CI -0.93 to -0.07, P=0.023   |                                                                                                                                                                 |                                                                                                                                                                                              |                                                                                         |                                                        |
| 27<br>28<br>29                                           |                                                                                                                                |                                                                                             |                                                                                                                |                                                                                                                         | Significantly improved with PGB vs PLA LSMD -0.55, 95% CI -0.93 to -0.17, P=0.004   |                                                                                                                                                                 |                                                                                                                                                                                              |                                                                                         |                                                        |
| 30<br>31<br>32                                           | Significant treatment difference favouring PGB over PLA for DPN pain (P=0.034) and DPN pain on walking (P=0.001)               |                                                                                             |                                                                                                                |                                                                                                                         |                                                                                     |                                                                                                                                                                 | Significant improvements with PGB compared to PLA (P=0.002)                                                                                                                                  |                                                                                         |                                                        |
| 33<br>34<br>35                                           |                                                                                                                                | Significantly improved with PGB compared to PLA: MD -21, 95% CI: -23.8 to -18.2; P = 0.004) |                                                                                                                |                                                                                                                         |                                                                                     |                                                                                                                                                                 |                                                                                                                                                                                              |                                                                                         |                                                        |
| 36<br>37<br>38<br>39                                     |                                                                                                                                |                                                                                             |                                                                                                                |                                                                                                                         | Significantly favoured PGB over PLA (P<0.05)                                        | Significant improvement with PGB over PLA in sleep quantity (P=0.03), sleep adequacy (P=0.13), snoring (P=0.39), and reduced the sleep problems index (P=0.049) | No significant difference between groups at endpoint, MD 0 (95% CI -0.1, 0.1) P= 0.566                                                                                                       | Significant improvement of in PGB group vs PLA: MD -0.3 (95% CI -0.6, 0) (P=0.049)      |                                                        |
| 40<br>41                                                 | No significant difference between groups, P values not reported                                                                |                                                                                             |                                                                                                                |                                                                                                                         |                                                                                     |                                                                                                                                                                 |                                                                                                                                                                                              |                                                                                         |                                                        |
| 42<br>43                                                 |                                                                                                                                |                                                                                             |                                                                                                                |                                                                                                                         | Significantly favoured PGB over PLA (P=0.0001)                                      |                                                                                                                                                                 |                                                                                                                                                                                              |                                                                                         |                                                        |
| 44<br>45<br>46                                           |                                                                                                                                |                                                                                             | Significant decrease with PGB compared with PLA: MD -8.18, 95% CI: -11.99 to -4.37; P<0.0001)                  | Significant decrease in with PGB compared with PLA: MD -0.37, 95% CI: -0.58 to -0.16; P=0.0007).                        |                                                                                     | Significantly greater improvements with PGB in subscales of sleep disturbance (P=0.0039) and quantity of sleep (P=0.0035) compared with PLA                     | Significantly improved with PGB versus PLA: LSMD -0.49 95% CI -0.72 to -0.27, P<0.0001                                                                                                       | Significant improvement with PGB versus PLA, LSMD -0.62 95% (CI -0.86, -0.39), P<0.0001 |                                                        |
| 47<br>48<br>49<br>50<br>51<br>52<br>53                   |                                                                                                                                |                                                                                             |                                                                                                                |                                                                                                                         | Significantly favoured PGB over PLA: LSMD -0.51 (95% CI, -0.96 to -0.07; P = 0.024) | Significantly greater improvements with PGB in subscales of sleep disturbance (P=0.0034) and quantity of sleep (P=0.018) compared with PLA                      | No significant differences in endpoint scores of EQ-5D utility score least squares means 0.03, 95% CI -0.04, 0.09 P= 0.429, or EQ-5D VAS at endpoint LSMD 3.50 (95% CI -1.18, 8.18) P= 0.142 | No statistically significant difference between groups                                  | No statistically significant difference between groups |
| 54<br>55<br>56                                           |                                                                                                                                |                                                                                             |                                                                                                                |                                                                                                                         | No significant difference between groups: MD 0.11 (95% CI -0.60 to 0.82)            |                                                                                                                                                                 |                                                                                                                                                                                              |                                                                                         |                                                        |
| 57<br>58<br>59<br>60                                     |                                                                                                                                |                                                                                             | Significantly favoured PGB 600mg/day over PLA (MD -14.67, 95% CI, -21.92 to -7.41; P = 0.0002). No significant | Significantly favoured PGB 600mg/day over PLA (MD -0.66, 95% CI, -0.97 to -0.35; P = 0.0002). No significant difference | Significantly favoured PGB over PLA: LSMD -1.152; 95% CI -1.752 to -0.551; P=0.0004 |                                                                                                                                                                 |                                                                                                                                                                                              |                                                                                         |                                                        |

1  
2  
3  
4  
5  
6  
7  
8  
9  
10  
11  
12  
13  
14  
15  
16  
17  
18  
19  
20  
21  
22  
23  
24  
25  
26  
27  
28  
29  
30  
31  
32  
33  
34  
35  
36  
37  
38  
39  
40  
41  
42  
43  
44  
45  
46  
47  
48  
49  
50  
51  
52  
53  
54  
55  
56  
57  
58  
59  
60

|                   |                                                                                                                                                          |                                                                                                                                                           |                                                                                                                                         |                                                                                   |                                                                                                                                                             |                                                                                                                                                                    |                                                                                                                                                                                        |                                                               |
|-------------------|----------------------------------------------------------------------------------------------------------------------------------------------------------|-----------------------------------------------------------------------------------------------------------------------------------------------------------|-----------------------------------------------------------------------------------------------------------------------------------------|-----------------------------------------------------------------------------------|-------------------------------------------------------------------------------------------------------------------------------------------------------------|--------------------------------------------------------------------------------------------------------------------------------------------------------------------|----------------------------------------------------------------------------------------------------------------------------------------------------------------------------------------|---------------------------------------------------------------|
|                   |                                                                                                                                                          |                                                                                                                                                           | difference between PGB 150mg/day and PLA (MD -4.78, 95% CI, -12.20 to -2.64; P = 0.20)                                                  | between PGB 150 mg/day and PLA (MD -0.17, 95% CI, -0.49 to 0.14; P = 0.28)        |                                                                                                                                                             |                                                                                                                                                                    |                                                                                                                                                                                        |                                                               |
| Rosenstock 2004   |                                                                                                                                                          |                                                                                                                                                           | Significantly favoured PGB over PLA (MD -16.19, 95% CI, -24.52 to -7.86; P = 0.0002)                                                    | Significantly favoured PGB over PLA (MD -0.37, 95% CI, -0.72 to -0.02; P = 0.036) | Significantly favoured PGB over PLA: LSMD -1.54, 95% CI -2.28 to -0.80, P=0.0001                                                                            |                                                                                                                                                                    |                                                                                                                                                                                        |                                                               |
| Sabatowski 2004   |                                                                                                                                                          |                                                                                                                                                           |                                                                                                                                         |                                                                                   | Significantly favoured PGB over PLA: LSMD -1.11, 95% CI -1.71 to -0.51, P=0.0003 for 150 mg/day; LSMD -1.43, 95% CI -2.04 to -0.82, P=0.0001 for 300 mg/day |                                                                                                                                                                    |                                                                                                                                                                                        |                                                               |
| Atoh 2011         |                                                                                                                                                          |                                                                                                                                                           | Significantly favoured PGB 300 mg/day and 600 mg/day over PLA (P < 0.05)                                                                |                                                                                   | Significantly improved in the 300 and 600 mg/day PGB groups compared with PLA (P < 0.0001 and P = 0.0273 respectively)                                      |                                                                                                                                                                    |                                                                                                                                                                                        |                                                               |
| Shabbir 2011      | Significant improvement in pain of DPN was observed in patients receiving PGB (48.1%) and compared to those receiving PLA (10.5%), P values not reported |                                                                                                                                                           |                                                                                                                                         |                                                                                   |                                                                                                                                                             |                                                                                                                                                                    |                                                                                                                                                                                        |                                                               |
| Siddall 2006      |                                                                                                                                                          |                                                                                                                                                           | Significantly favoured PGB over PLA (MD -17.6, 95% CI, -25.2 to -10.0; P<0.001)                                                         | Significantly favoured PGB over PLA (MD -0.66, 95% CI, -0.99 to -0.32; P<0.001)   |                                                                                                                                                             |                                                                                                                                                                    |                                                                                                                                                                                        |                                                               |
| Simpson 2010      |                                                                                                                                                          |                                                                                                                                                           |                                                                                                                                         |                                                                                   |                                                                                                                                                             |                                                                                                                                                                    | Significant self-reported improvement favouring PGB over PLA: 82.8% vs 66.7% (P= 0.008)                                                                                                |                                                               |
| Simpson 2014      |                                                                                                                                                          |                                                                                                                                                           |                                                                                                                                         |                                                                                   | No significant difference between groups: LSMD 0.04, 95% CI 0.43 to 0.35, P =0.840                                                                          |                                                                                                                                                                    | No significant differences between groups: (P=0.505)                                                                                                                                   | No significant differences between groups (P=0.427)           |
| Stacey 2008       |                                                                                                                                                          | Significant improvement in VAS allodynia scores with PGB compared to PLA (flexible-dose: MD -14.4 mm [P<0 .0001] and fixed-dose, MD -8.98 mm [P =0.0075]) | Significant improvement in with PGB compared to PLA (flexible-dose: MD -16.33 mm [P<0 .0001] and fixed-dose, MD -11.97 mm [P =0 .0008]) |                                                                                   | Significant improvements with flexible- and fixed-dose PGB. Results of between-group differences not reported                                               | Fixed or flexible dose PGB demonstrated significant improvement in VAS anxiety scores over PLA (fixed-dose, 19.95, P = 0.025, and flexible-dose, -17.81; P= 0.024) | Patients treated with any PGB treatment regimen were significantly more likely to rate themselves as minimally, much, or very much improved on the PGIC at end point compared with PLA |                                                               |
| Solle 2008        |                                                                                                                                                          |                                                                                                                                                           |                                                                                                                                         |                                                                                   |                                                                                                                                                             | Significant improvements in utility scores for 150, 300, 600mg/day respectively compared to PLA, all P ≤ 0.0263                                                    | Significant improvement with 600 mg/day PGB versus PLA in subjects reporting "improved" or "much improved" (50.5% vs 33.3%, P = 0.02)                                                  | Significant superiority of PGB 600 mg/day over PLA (P= 0.009) |
| San Seventer 2006 |                                                                                                                                                          |                                                                                                                                                           |                                                                                                                                         |                                                                                   | Significant improvement in MOS sleep scale problems with PGB compared with PLA MD - 7.54, 95% CI -11.52 to -3.56, P<0.001                                   |                                                                                                                                                                    | Patients in the 150 mg/day (P = 0.02) and 600 mg/day (P = 0.003) groups were more likely to report global improvement than those in the PLA group                                      |                                                               |
| van Seventer 2010 |                                                                                                                                                          |                                                                                                                                                           |                                                                                                                                         |                                                                                   |                                                                                                                                                             |                                                                                                                                                                    | Significant improvement in favour of PGB over PLA (P = 0.006)                                                                                                                          |                                                               |
| Vranken 2008      |                                                                                                                                                          | Significant decrease in with PGB compared with PLA: MD 2.18, 95% CI: 0.57 to 3.80; P = 0.01)                                                              |                                                                                                                                         |                                                                                   |                                                                                                                                                             |                                                                                                                                                                    | Statistically significant improvement for both the EQ-5D utility score (p<0.001) and EQ-5D VAS score with PGB compared to PLA (P<0.001)                                                |                                                               |

ABBREVIATIONS: CGIC: Clinician global impression of change; LSMD: Least square mean difference; MD: Mean difference; MOS-Sleep: Medical Outcomes Study Sleep Scale; NRS: numerical rating scale; PGB: Pregabalin; PGIC: Patient global impression of change; PLA: Placebo; SF-MPQ PPI: Short-Form McGill Pain Questionnaire personal pain intensity; SF-MPQ VAS: Short-Form McGill Pain Questionnaire visual assessment scale; VAS: Visual assessment scale

These outcome results have been presented narratively because there was inadequate data to pool results across studies

**Figure S1: Funnel plot for publication bias in RCTs assessing the effect of pregabalin in neuropathic pain.** The broken line represents the mean difference for all trials.

1  
2  
3  
4  
5  
6  
7  
8  
9  
10  
11  
12  
13  
14  
15  
16  
17  
18  
19  
20  
21  
22  
23  
24  
25  
26  
27  
28  
29  
30  
31  
32  
33  
34  
35  
36  
37  
38  
39  
40  
41  
42  
43  
44  
45  
46  
47

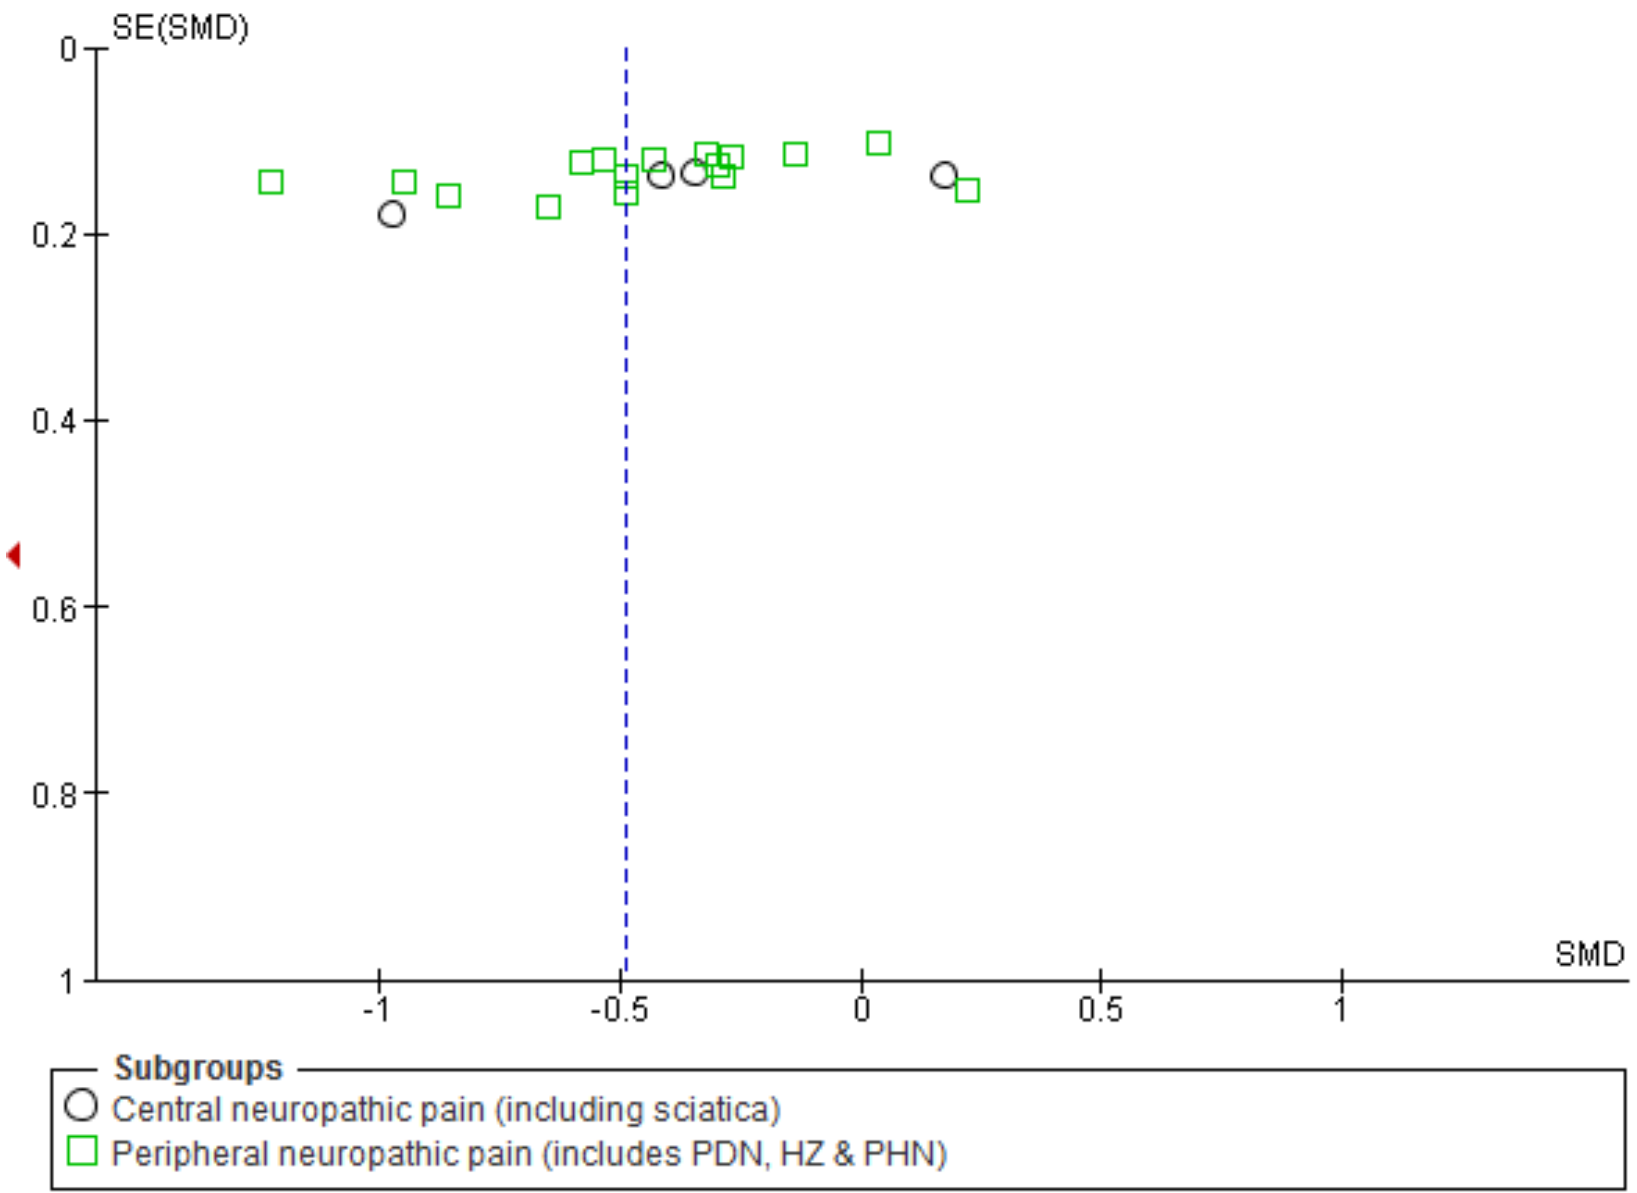

**Figure S2: Effect of pregabalin on the risk of weight gain in patients with neuropathic pain**

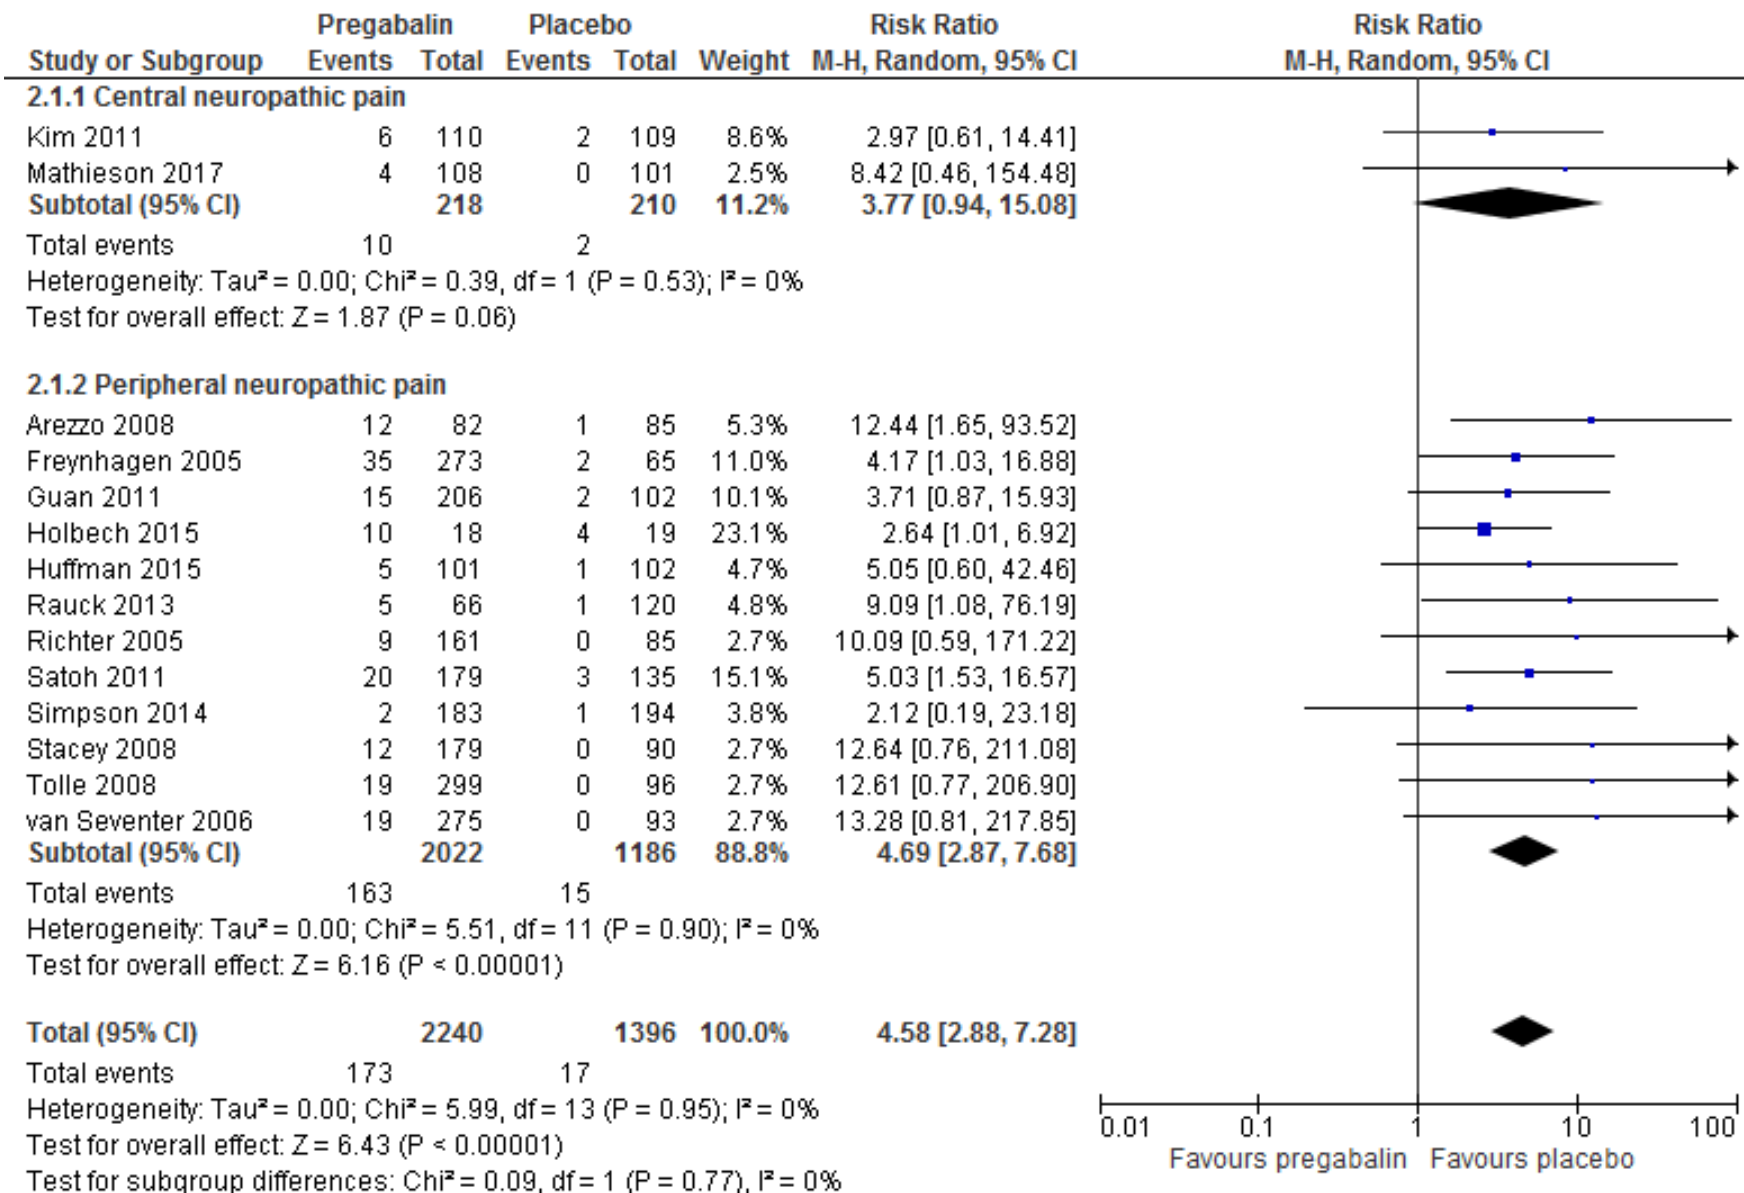



**Figure S3: Effect of pregabalin on the risk of somnolence in patients with neuropathic pain**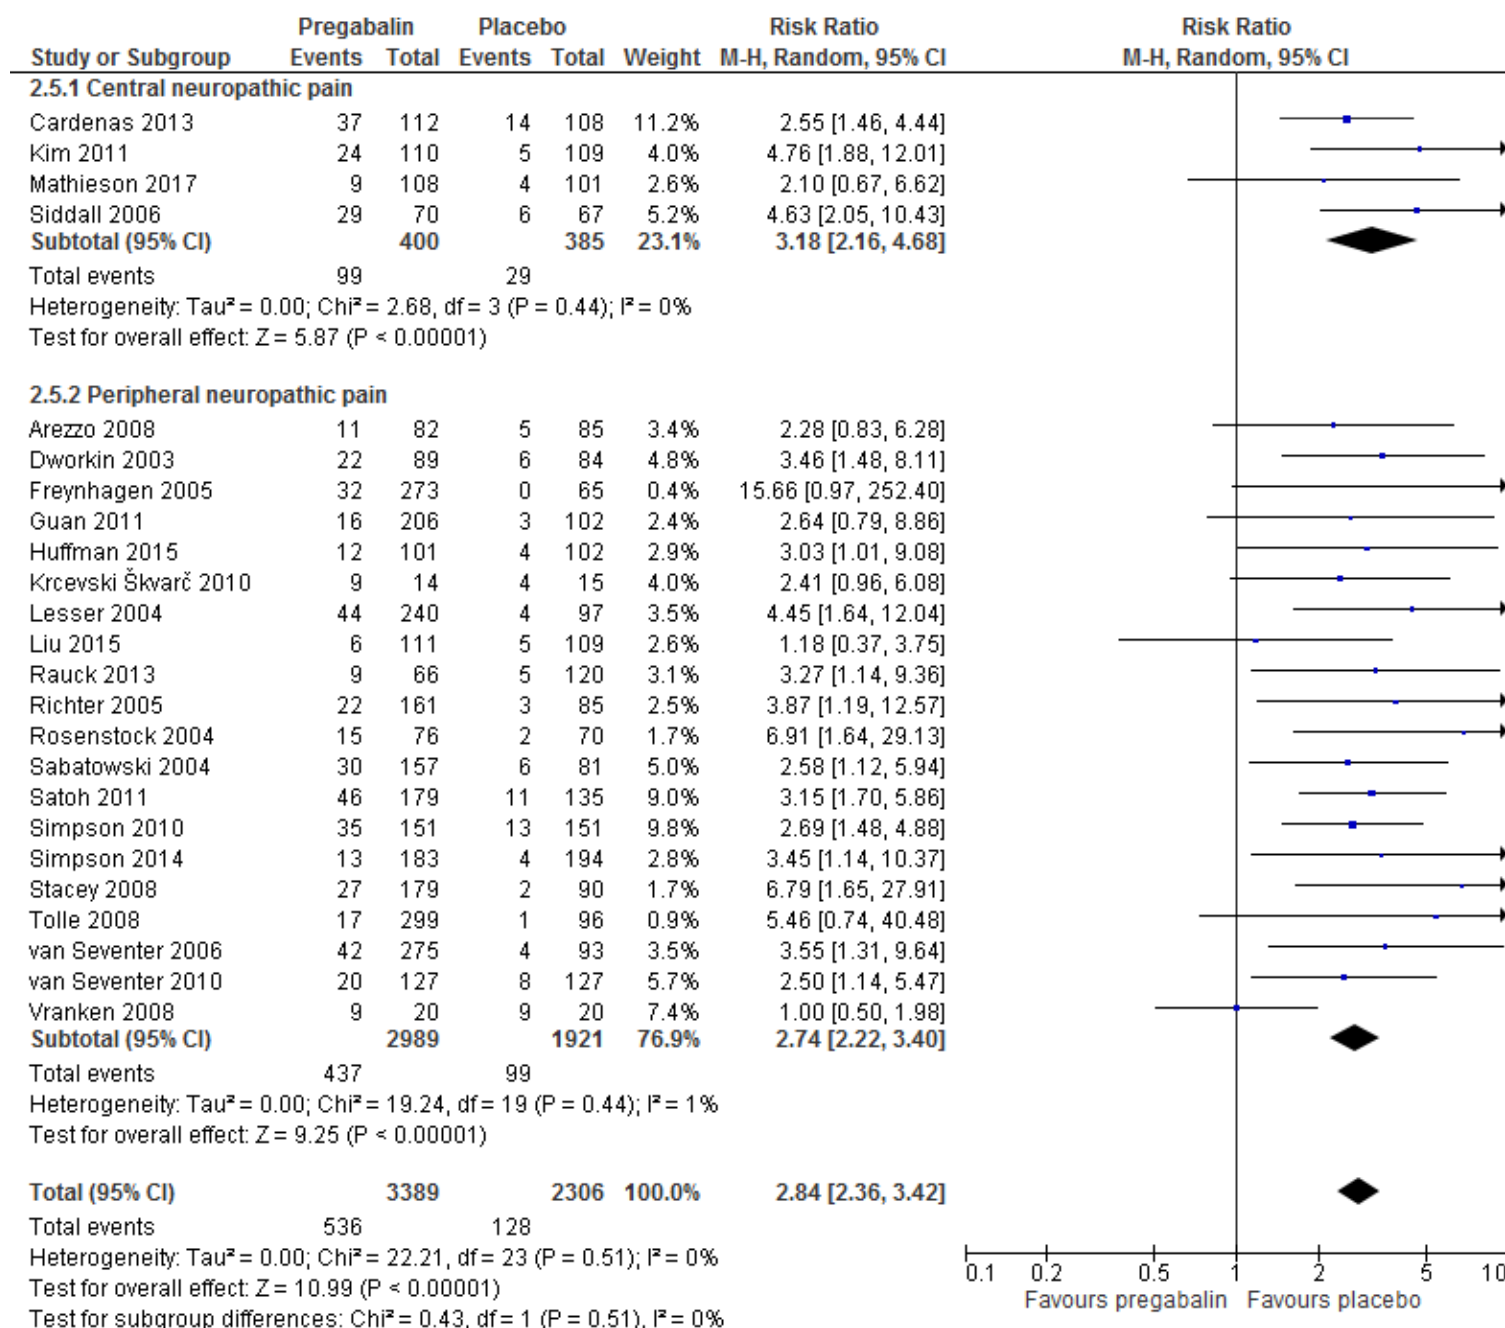

**Figure S4: Effect of pregabalin on the risk of dizziness in patients with neuropathic pain**

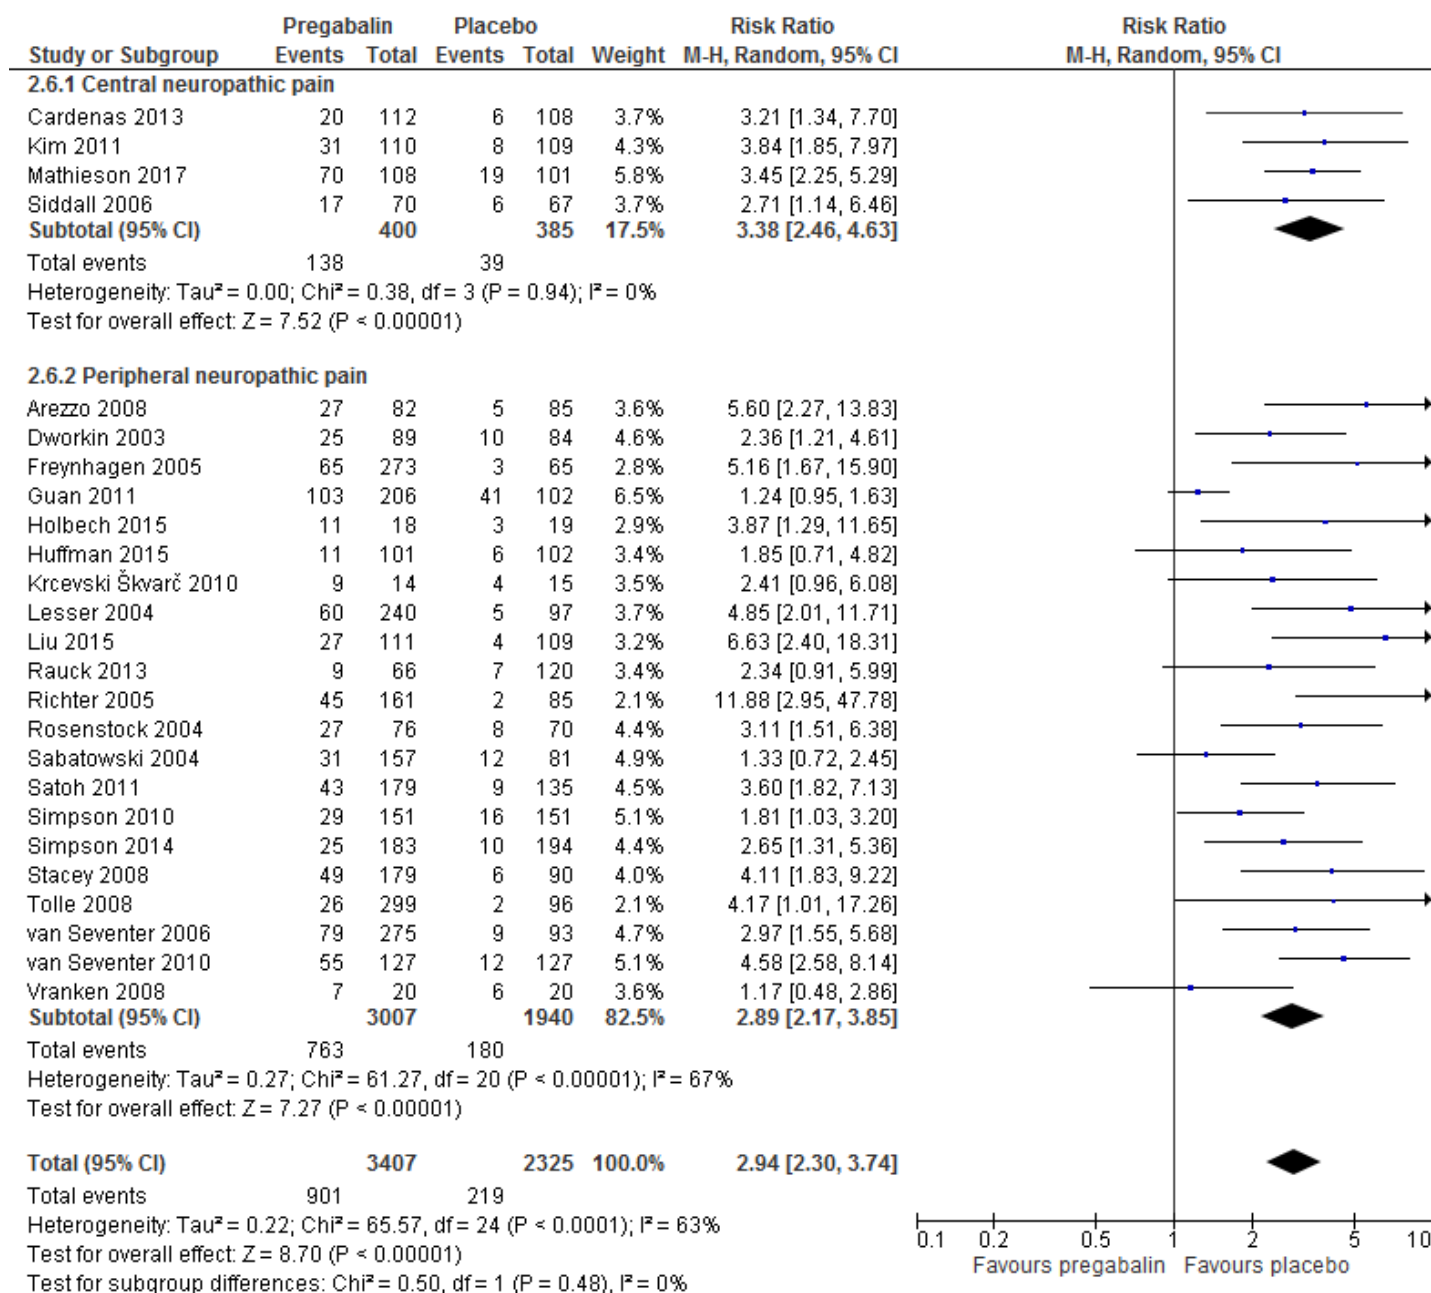

Figure S5: Effect of pregabalin on the risk of peripheral edema in patients with neuropathic pain

1  
2  
3  
4  
5  
6  
7  
8  
9  
10  
11  
12  
13  
14  
15  
16  
17  
18  
19  
20  
21  
22  
23  
24  
25  
26  
27  
28  
29  
30  
31  
32  
33  
34  
35  
36  
37  
38  
39  
40  
41  
42  
43  
44  
45  
46  
47

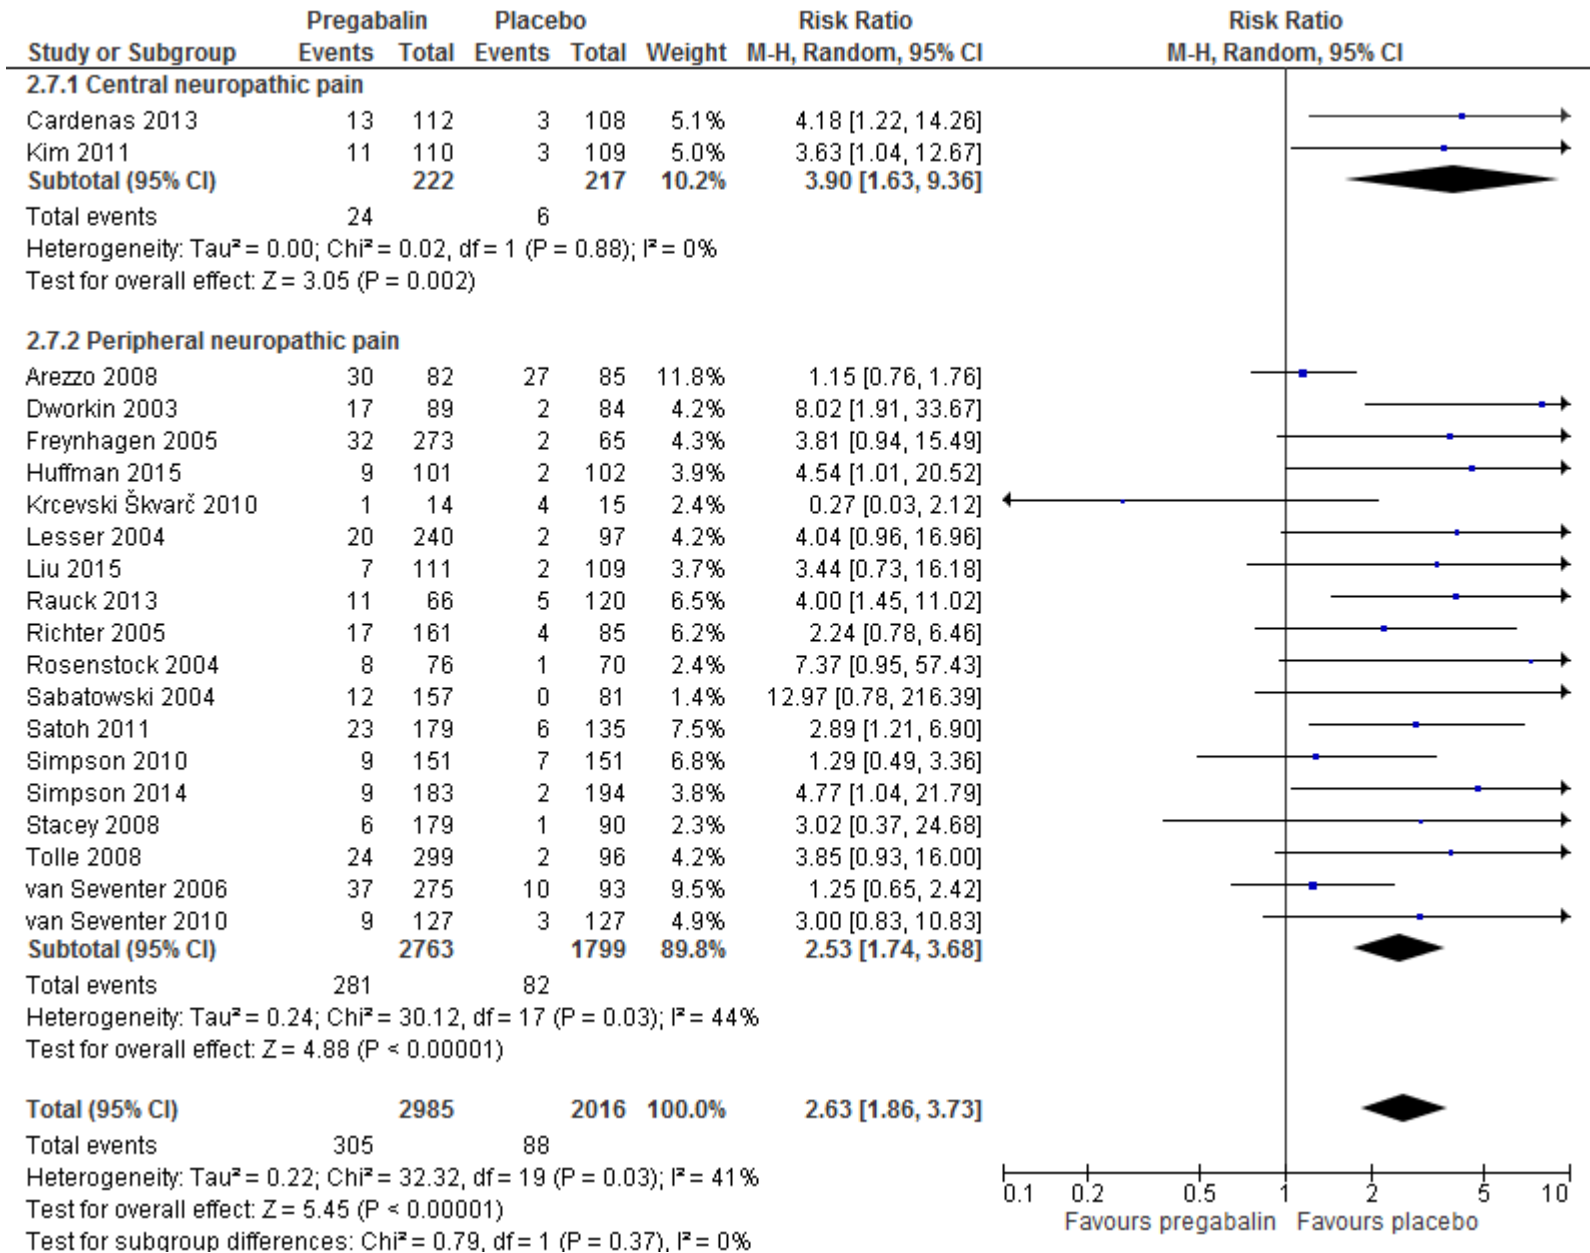

**Figure S6: Effect of pregabalin on the risk of fatigue including asthenia in patients with neuropathic pain**

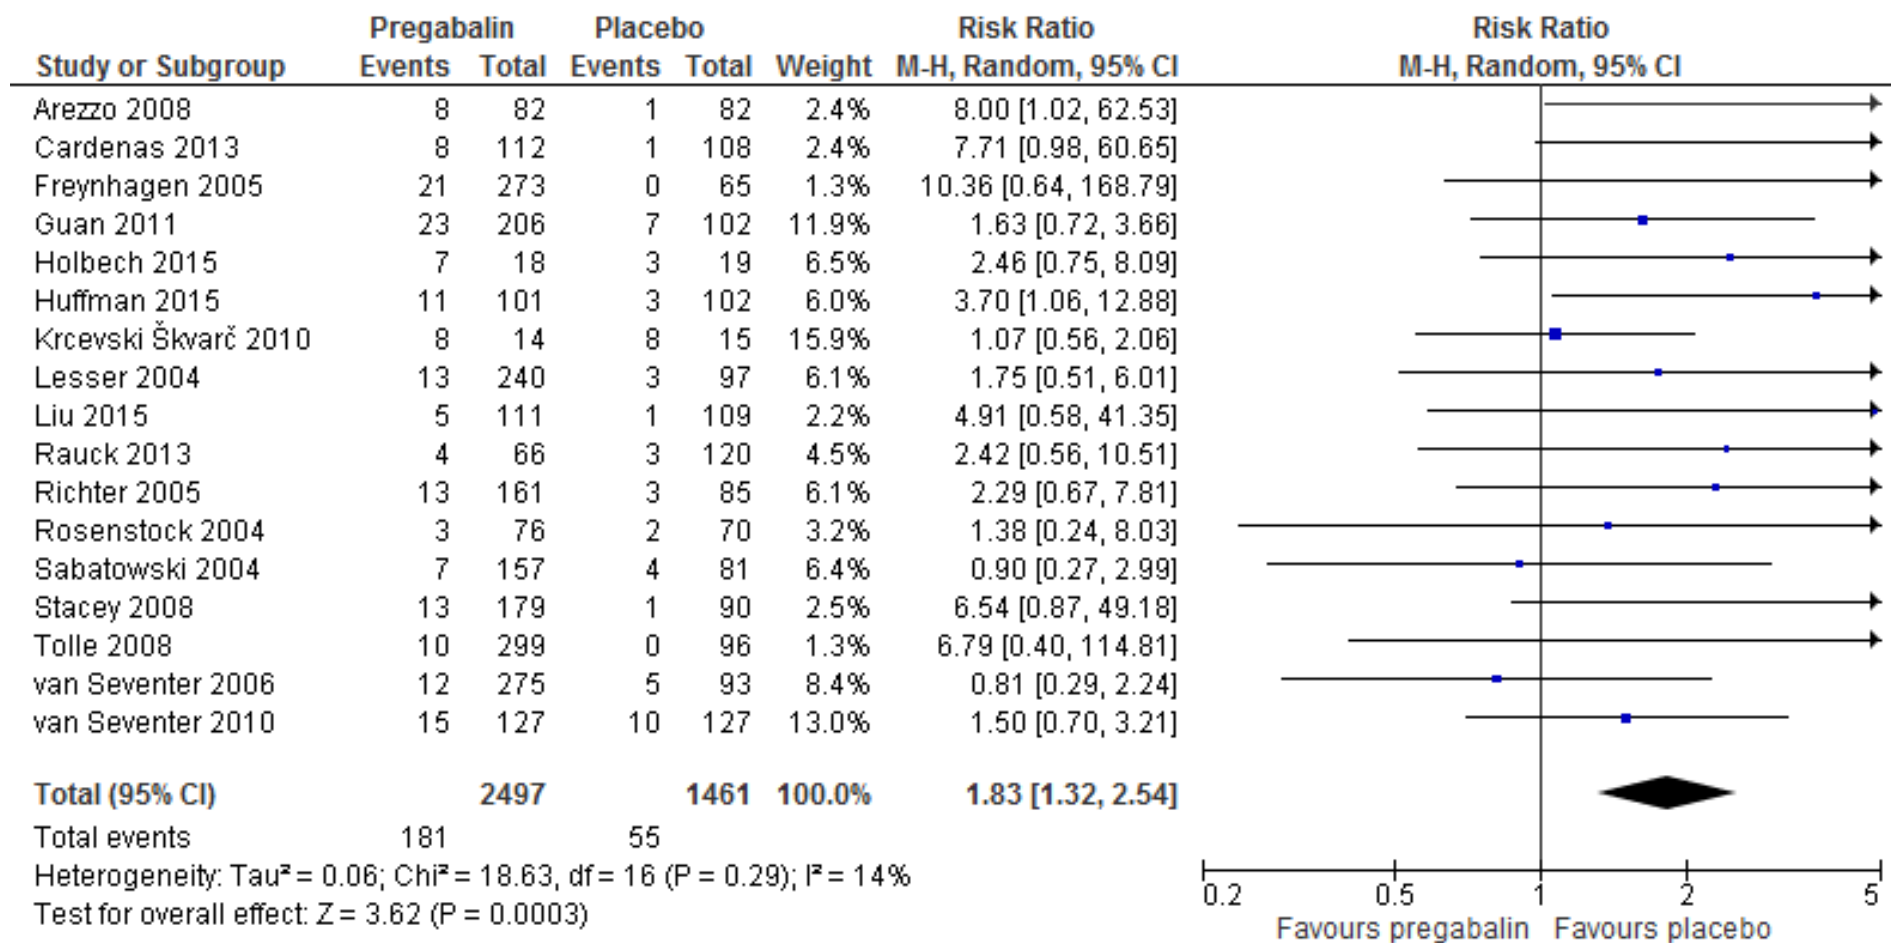

**Figure S7: Effect of pregabalin on the risk of visual disturbances\* in patients with neuropathic pain**

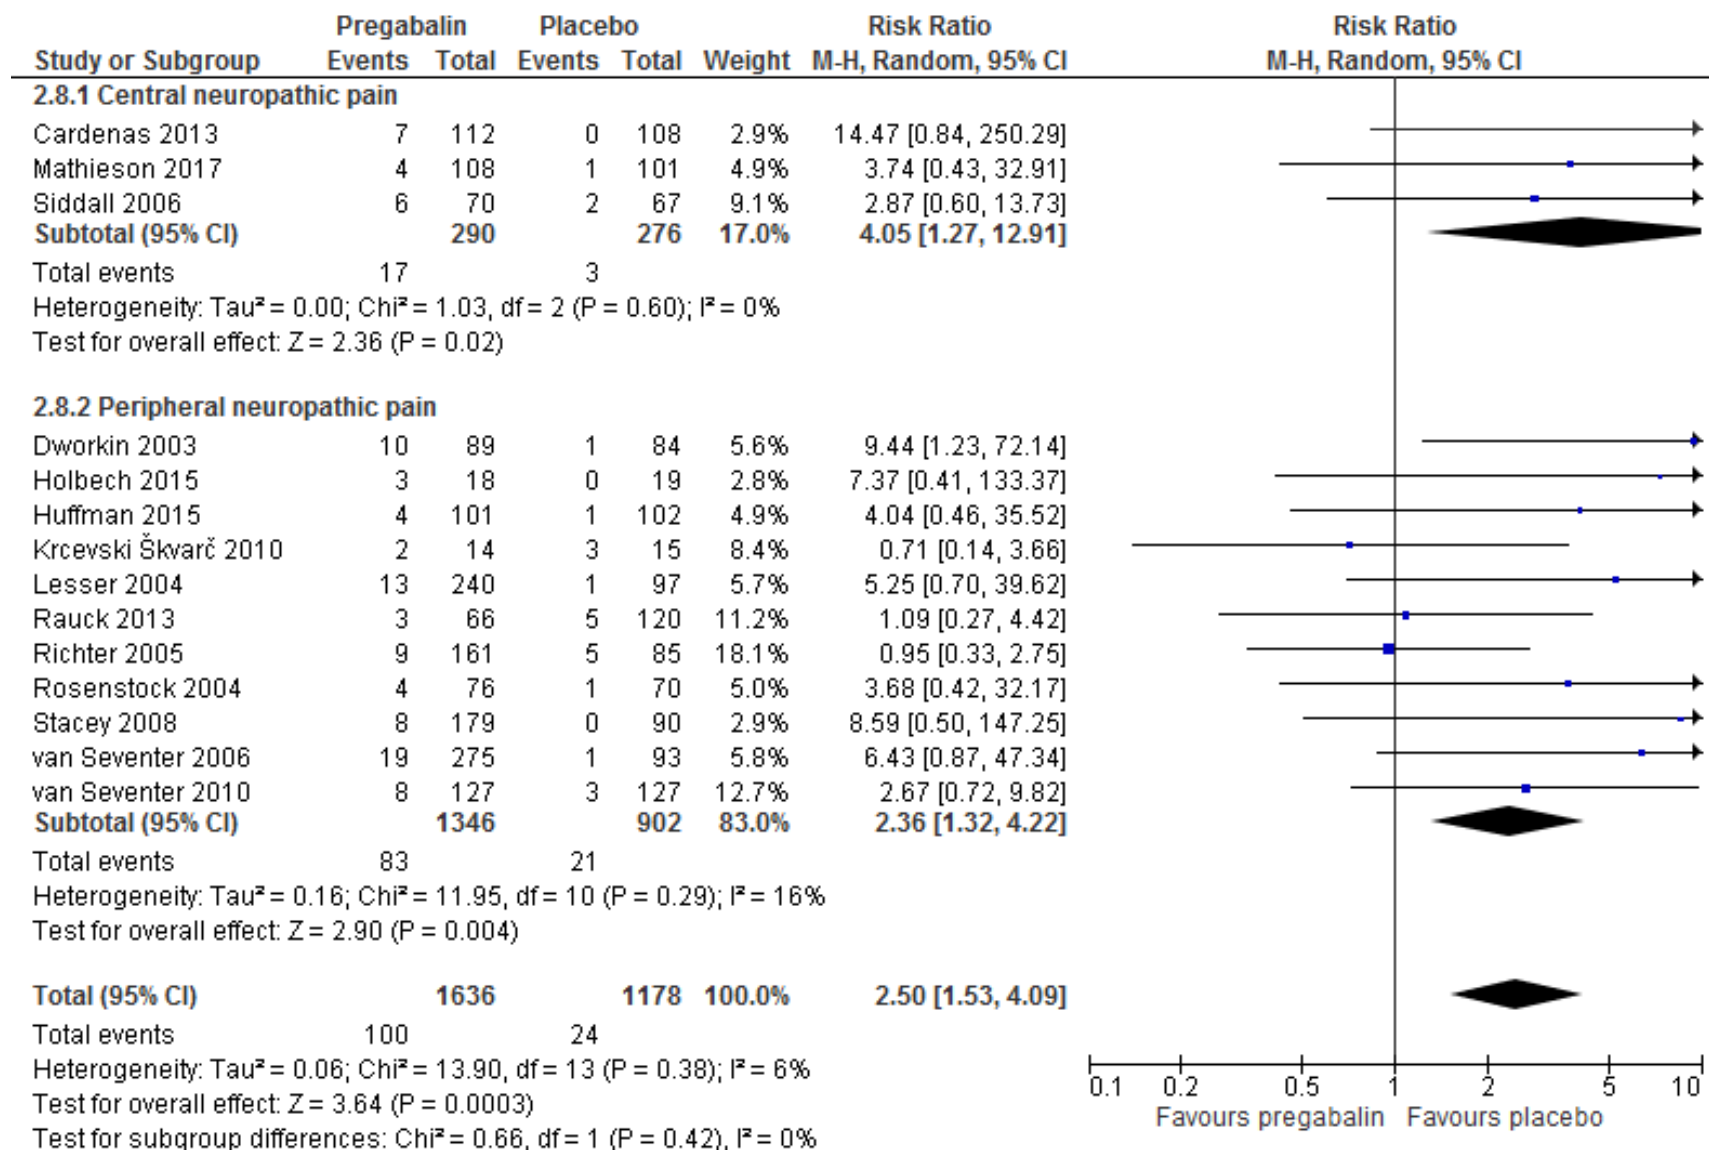

\*includes blurring of vision and amblyopia

**Figure S8: Effect of pregabalin on the risk of ataxia in patients with neuropathic pain**

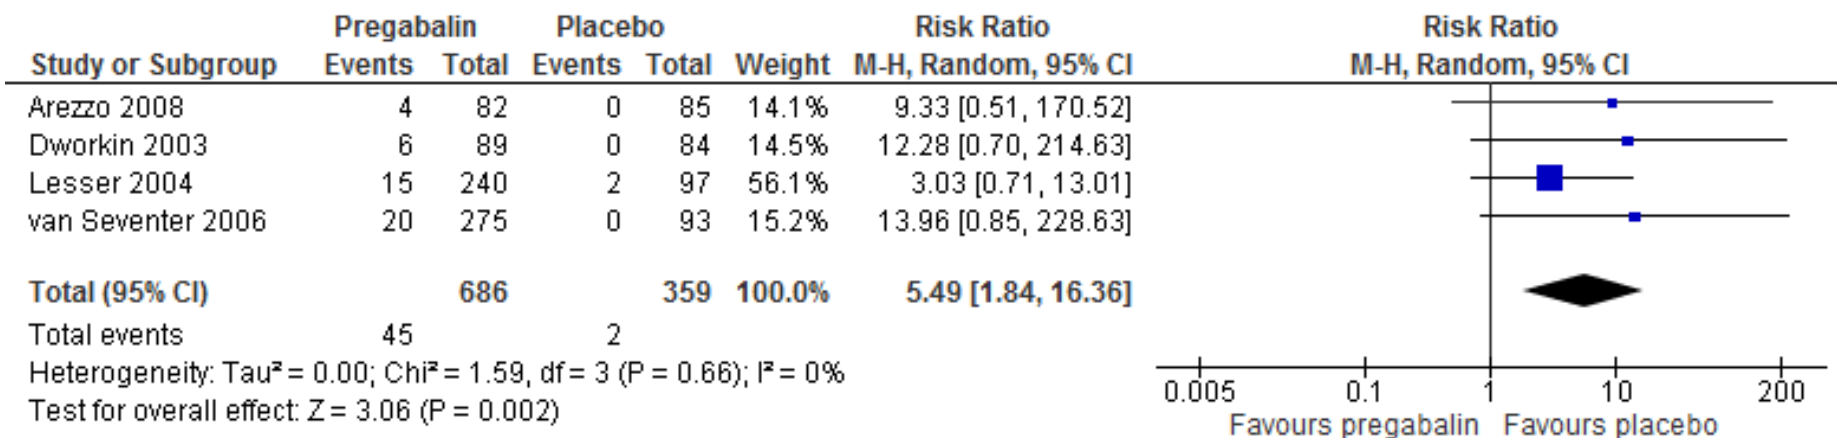

**Figure S9: Effect of pregabalin on the risk of non-peripheral edema in patients with neuropathic pain**

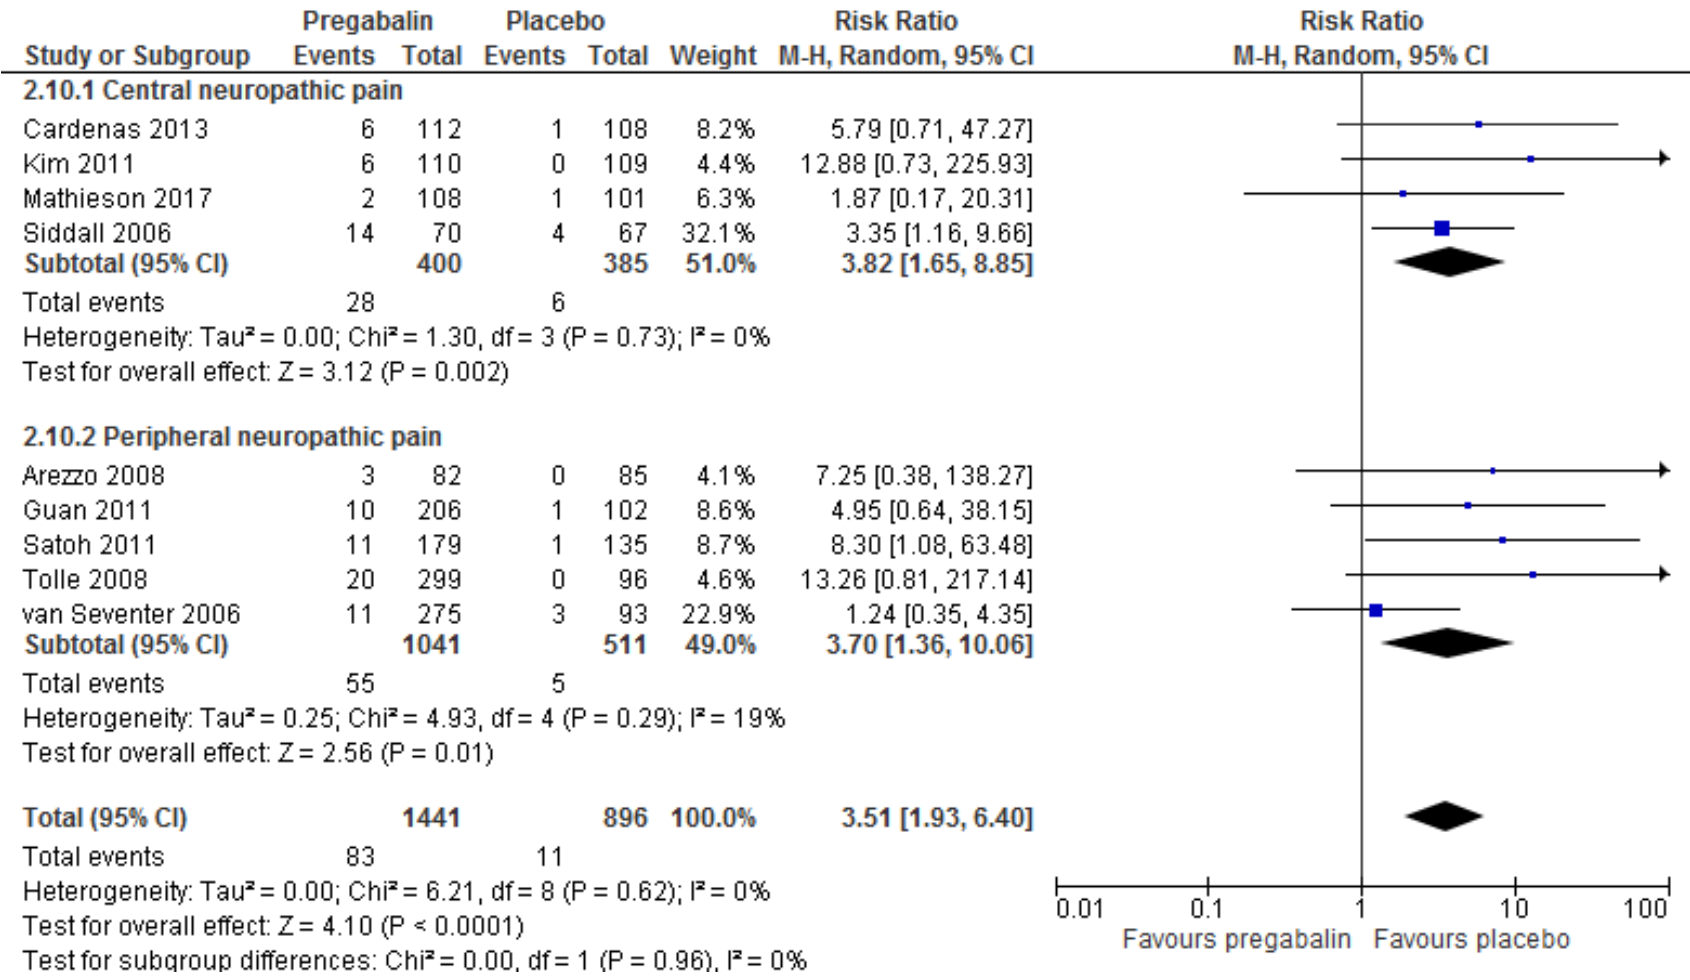

**Figure S10: Effect of pregabalin on the risk of vertigo in patients with neuropathic pain**

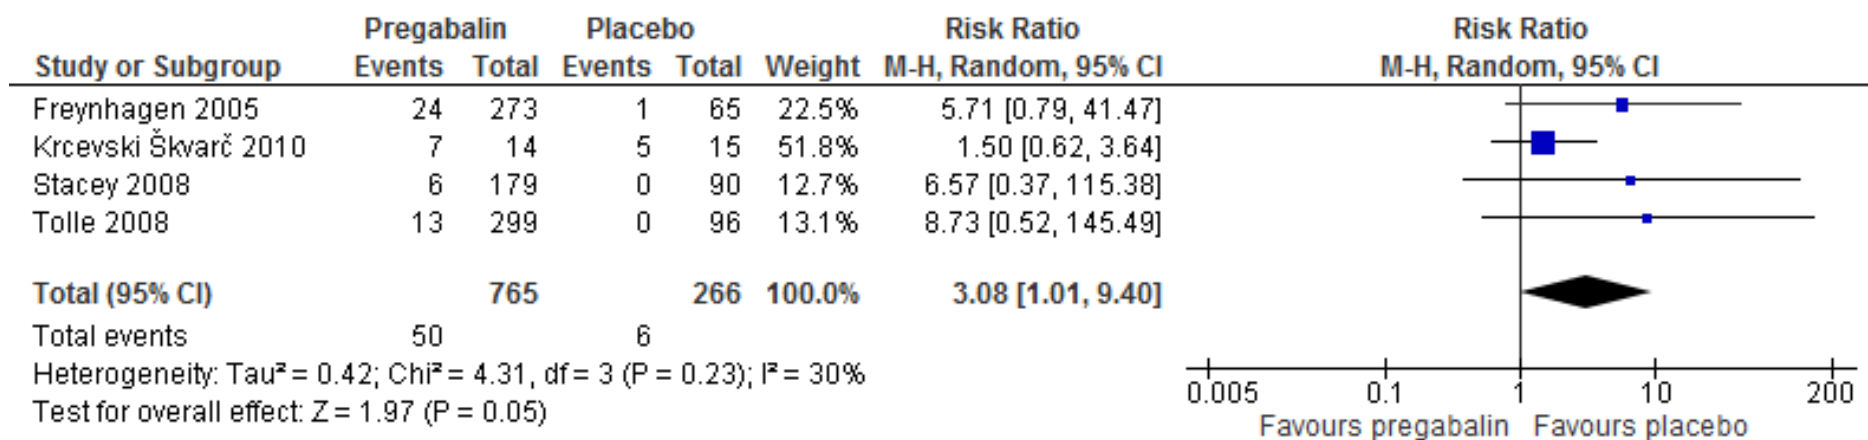



**Figure S11: Effect of pregabalin on the risk of euphoria in patients with neuropathic pain**

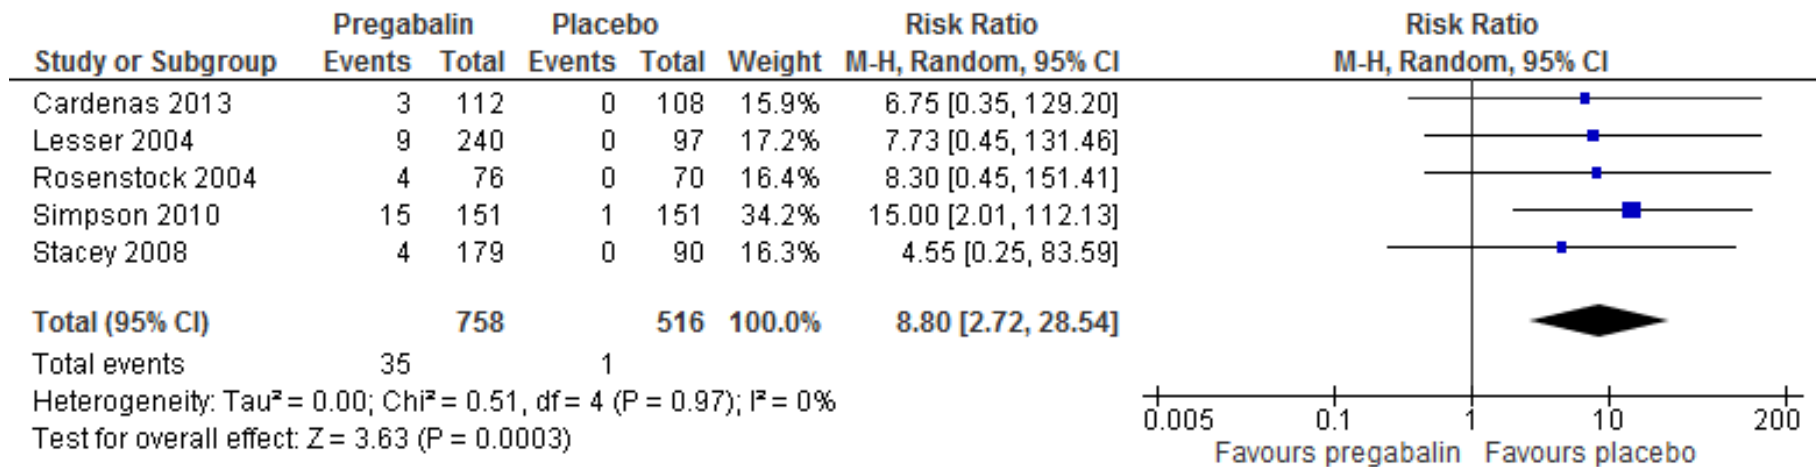

**Figure S12: Effect of pregabalin on the risk of dry mouth in patients with neuropathic pain**

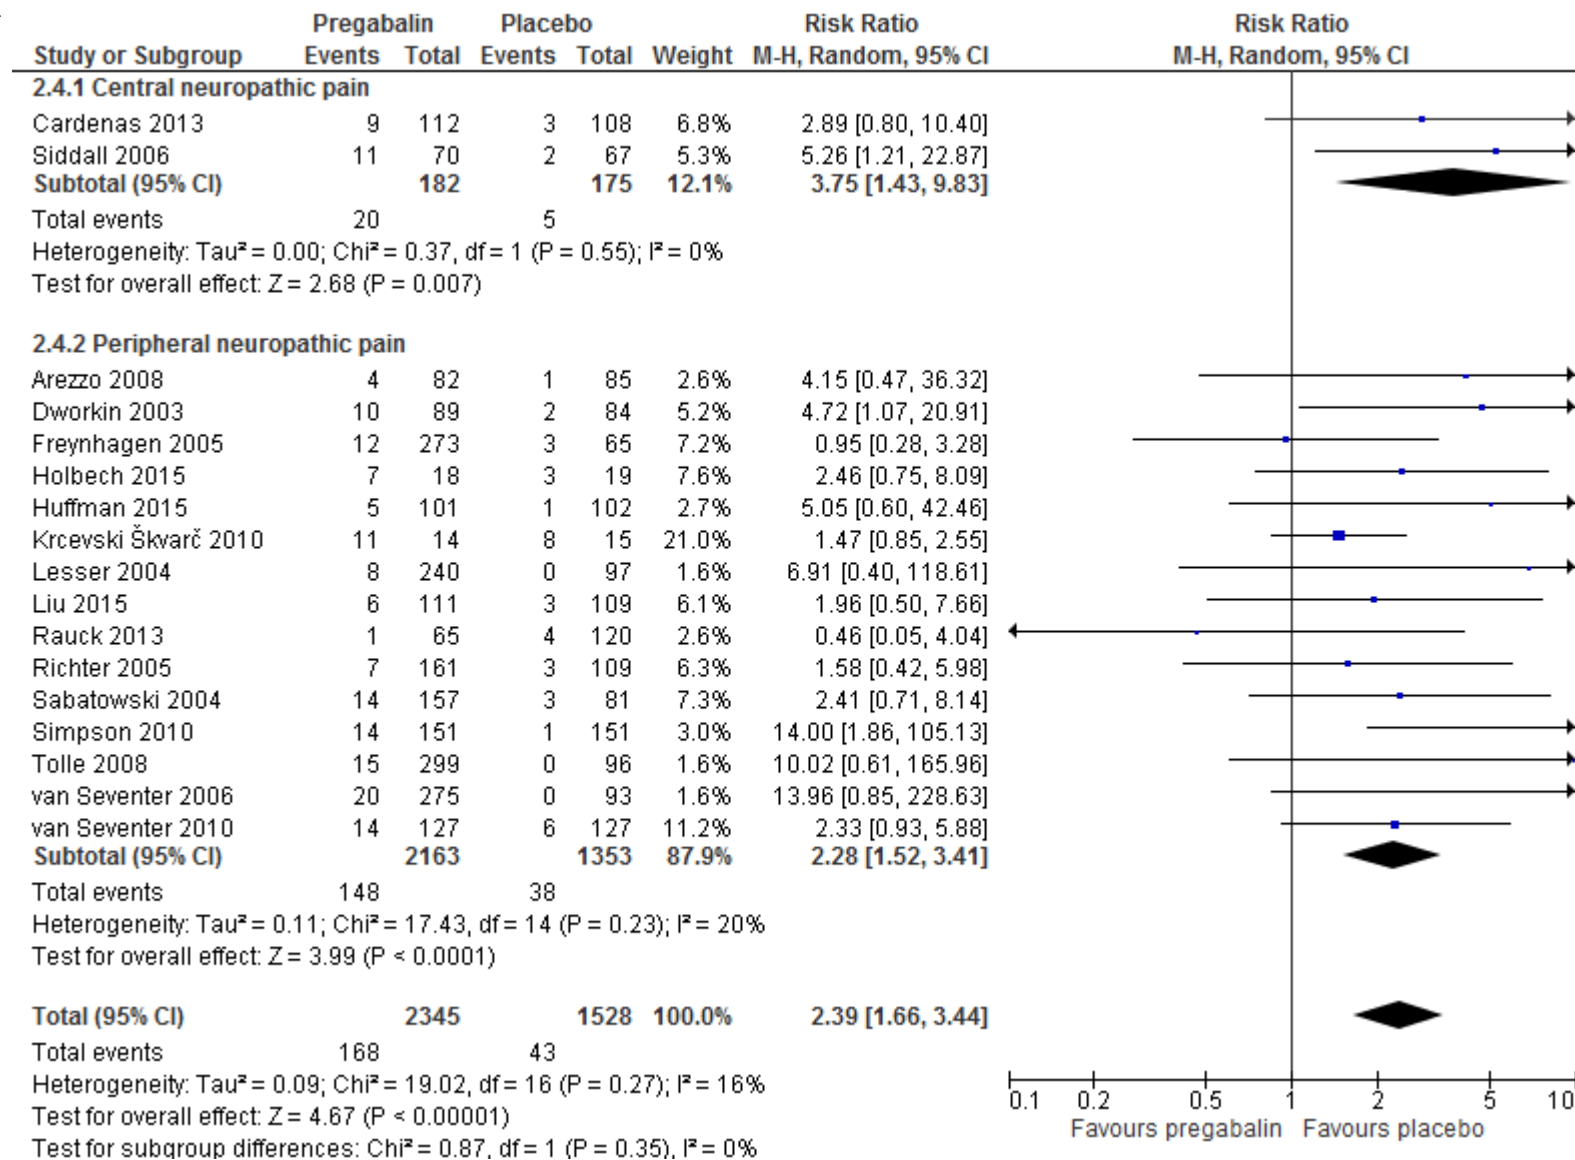

Figure S13: Effect of pregabalin on the risk of discontinuation due to adverse events

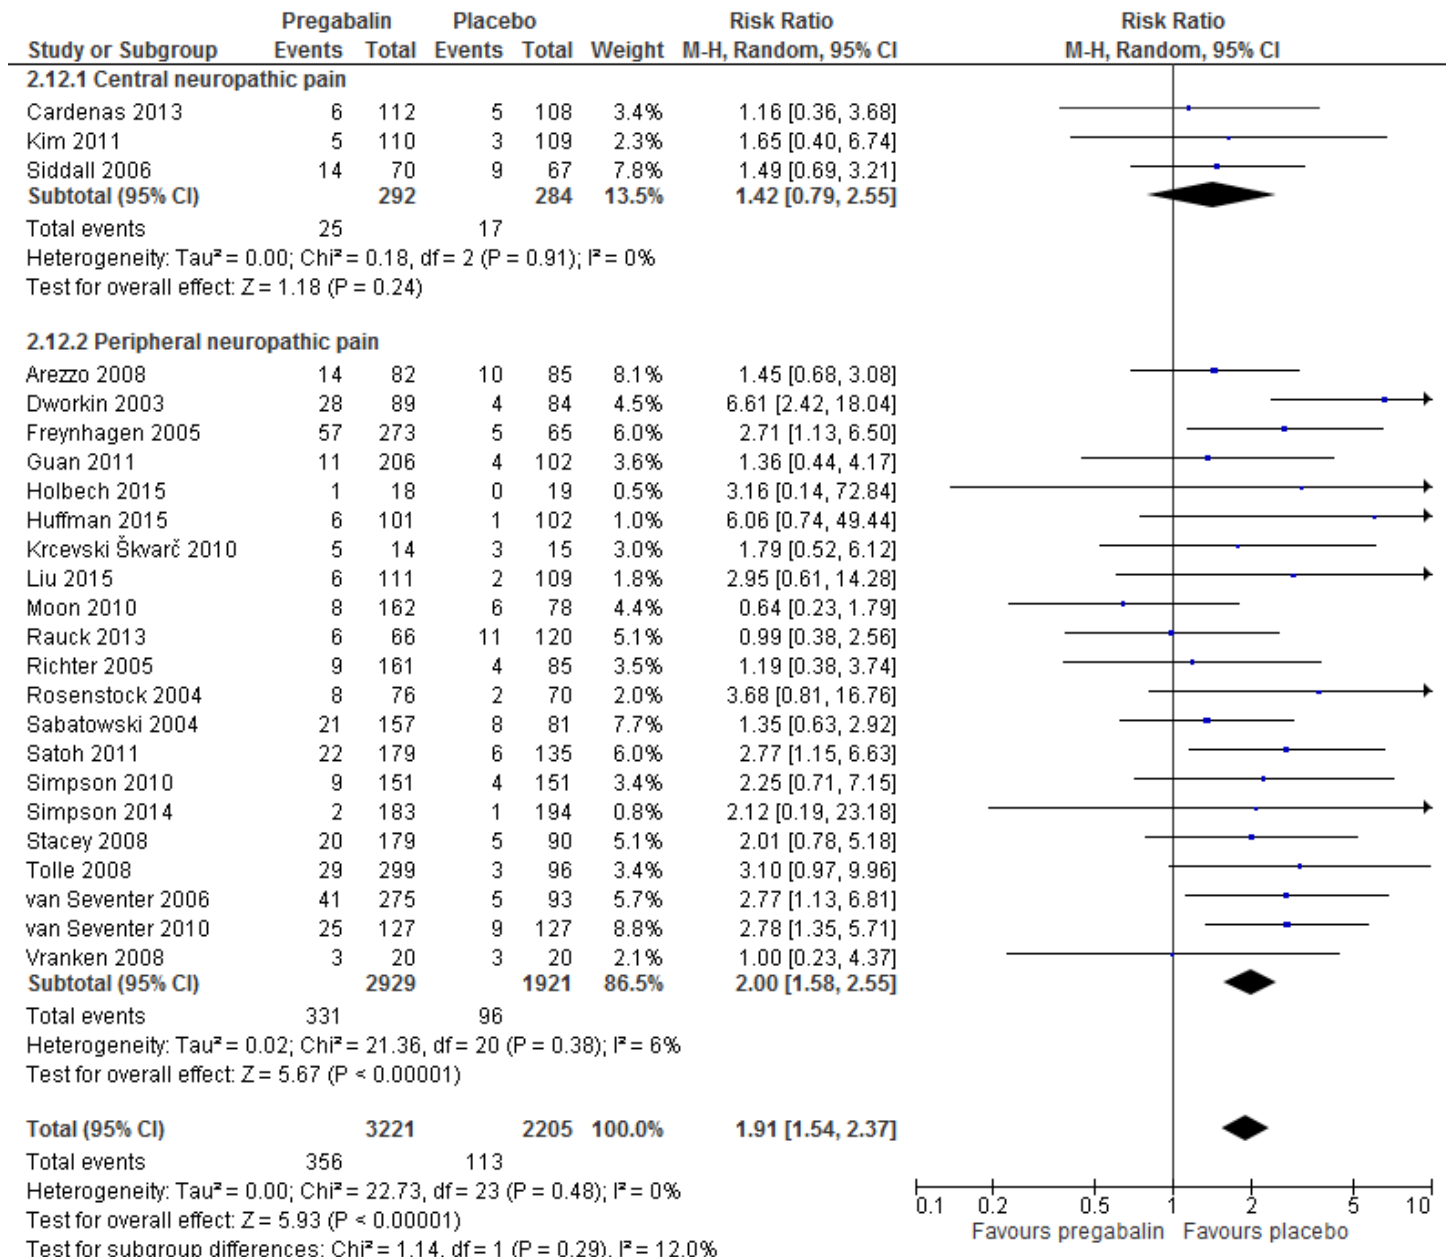

**Figure S14: Effect of pregabalin on the risk of serious adverse events in patients with neuropathic pain**

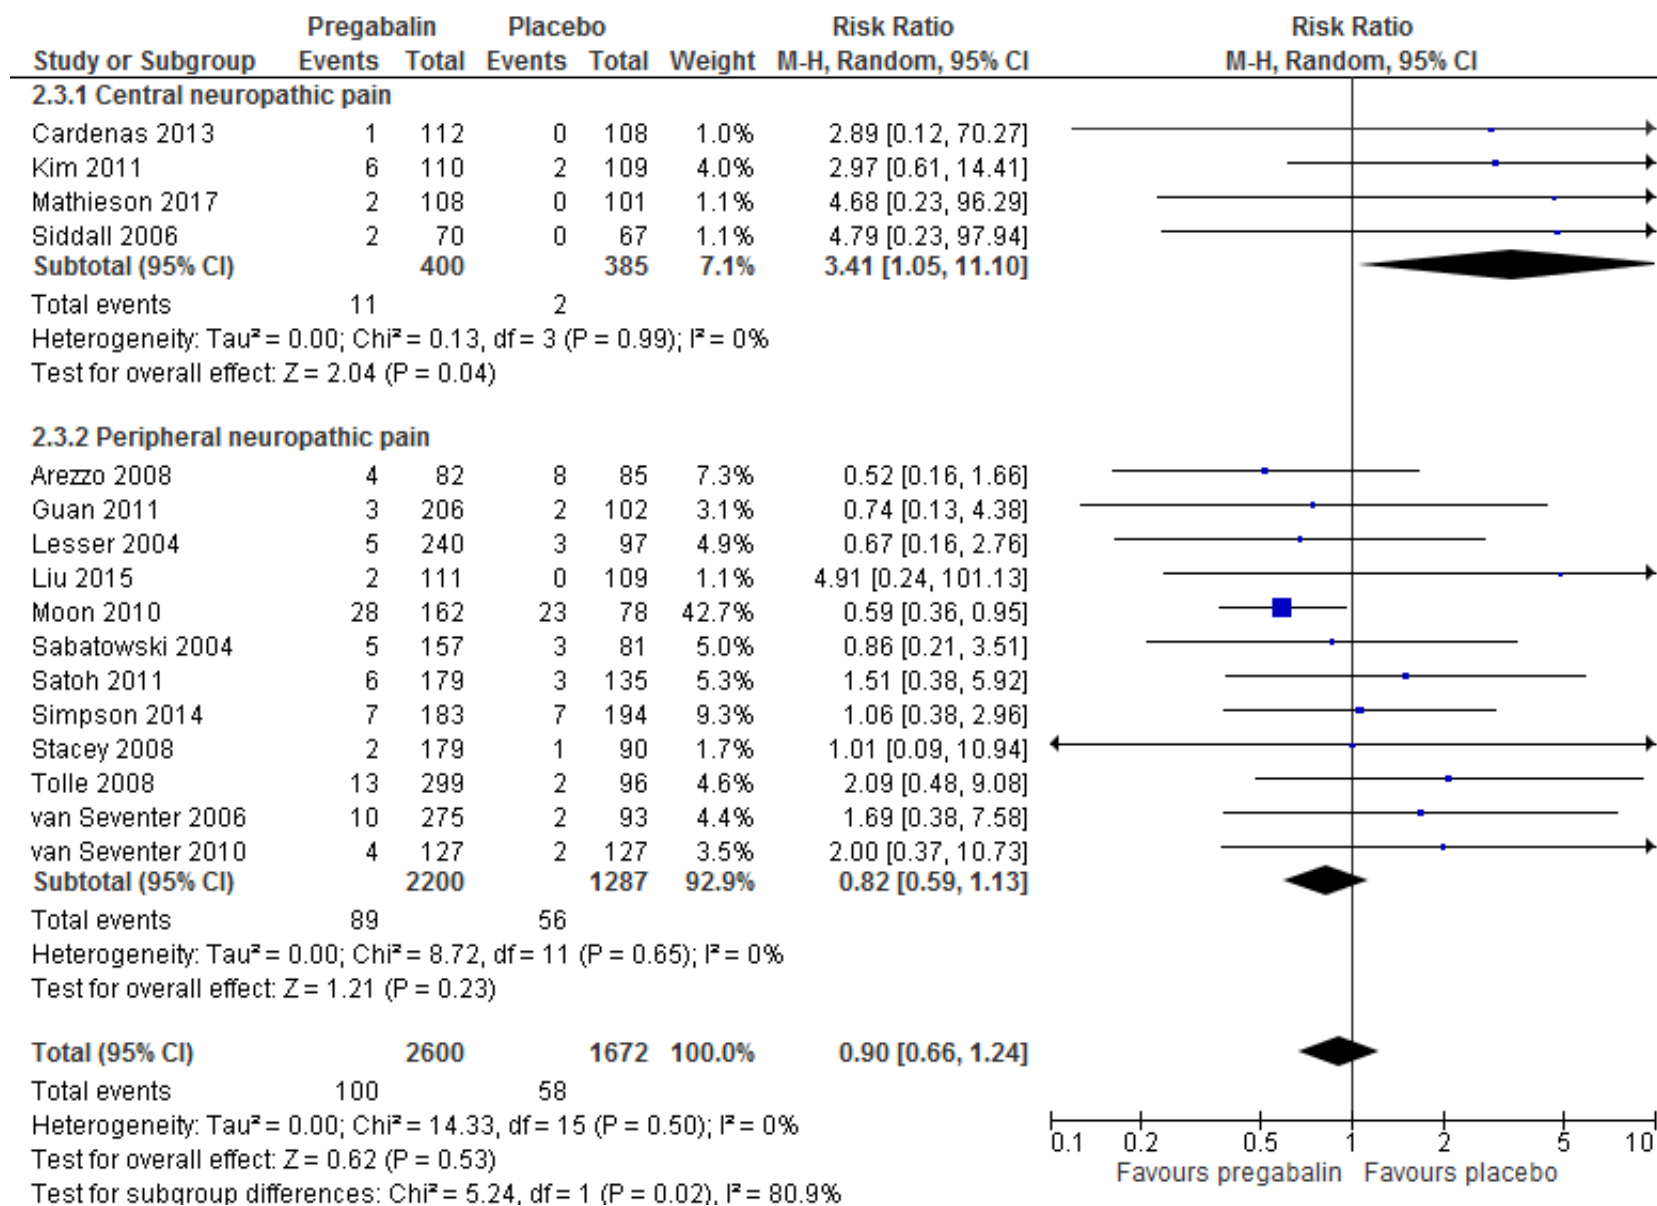

# Figure S15: Effect of pregabalin on the sleep disturbance in patients with neuropathic pain

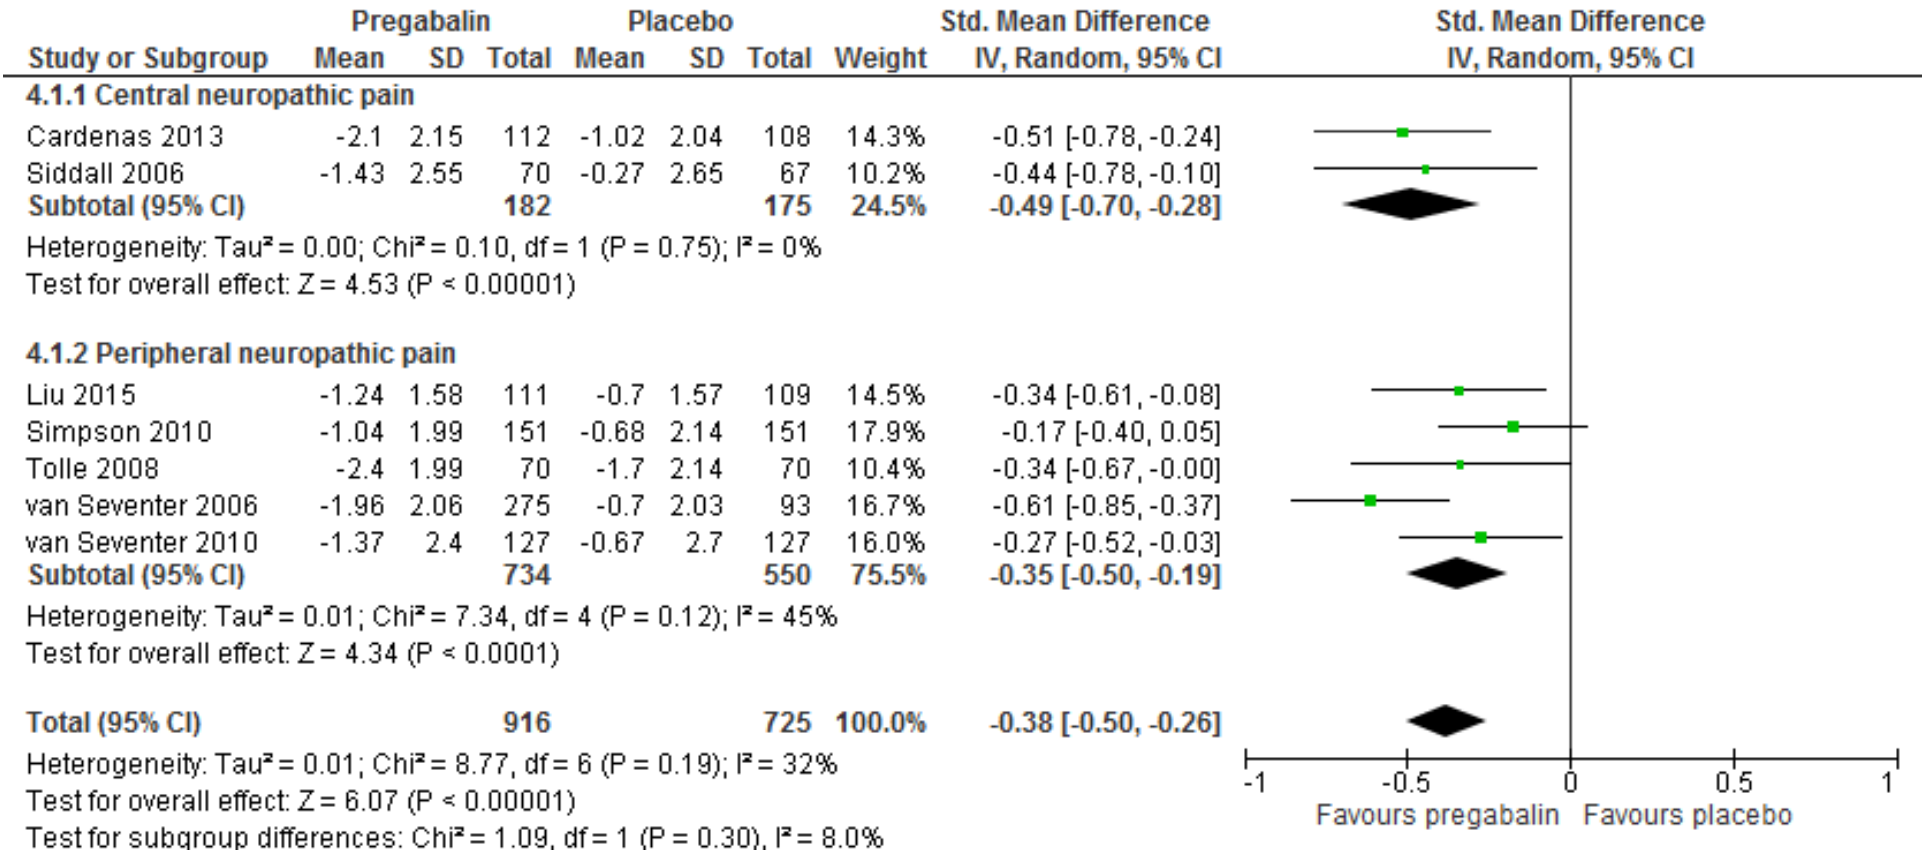

**Figure S16: Effect of pregabalin on HADS-anxiety scores in patients with neuropathic pain**

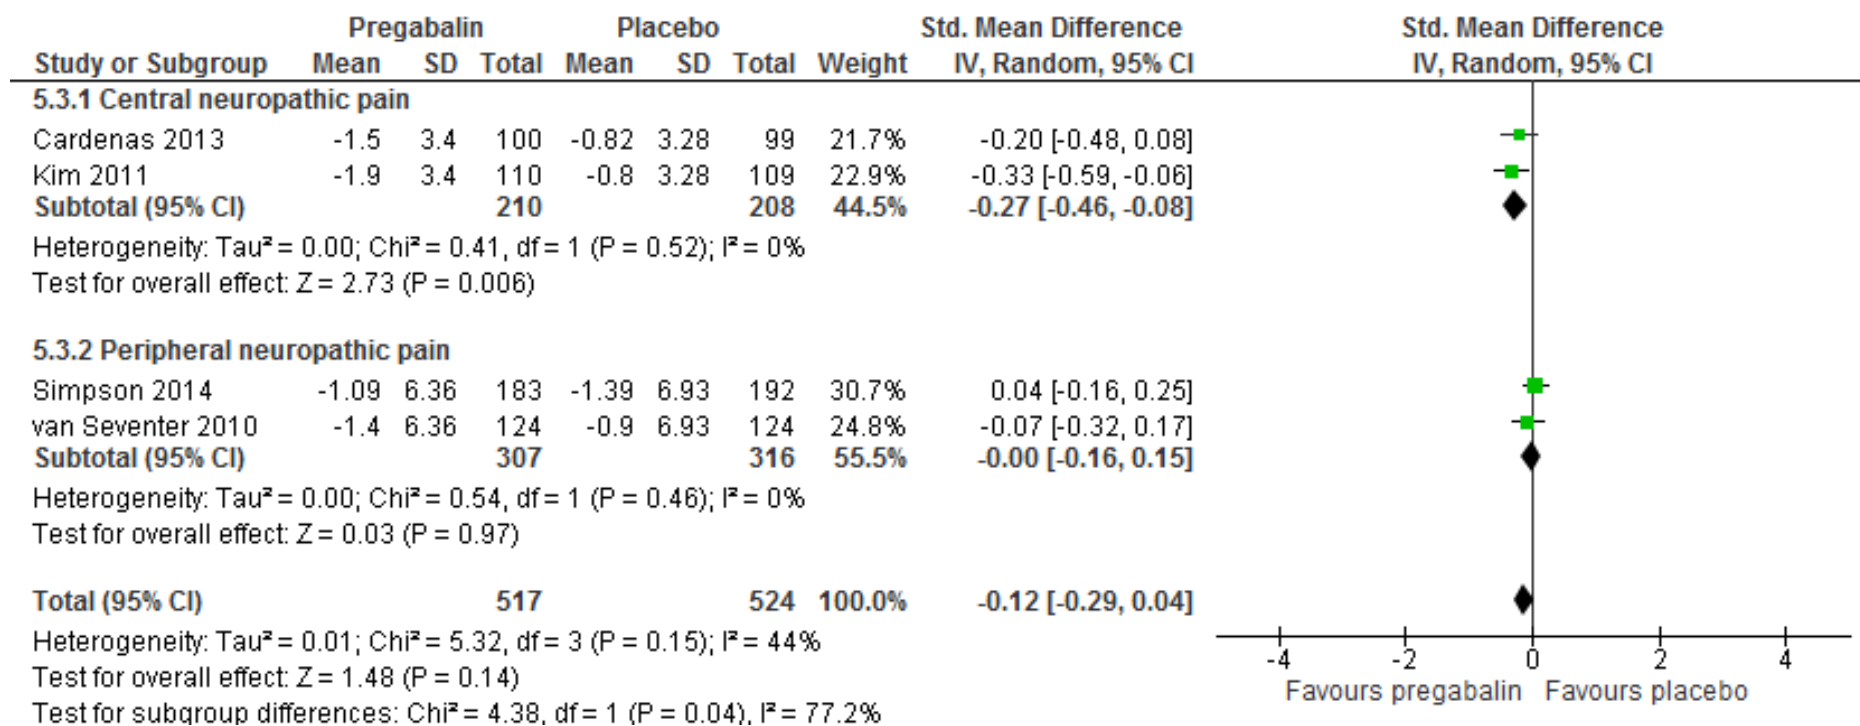

# Figure S17: Effect of pregabalin on HADS-depression scores in patients with neuropathic pain

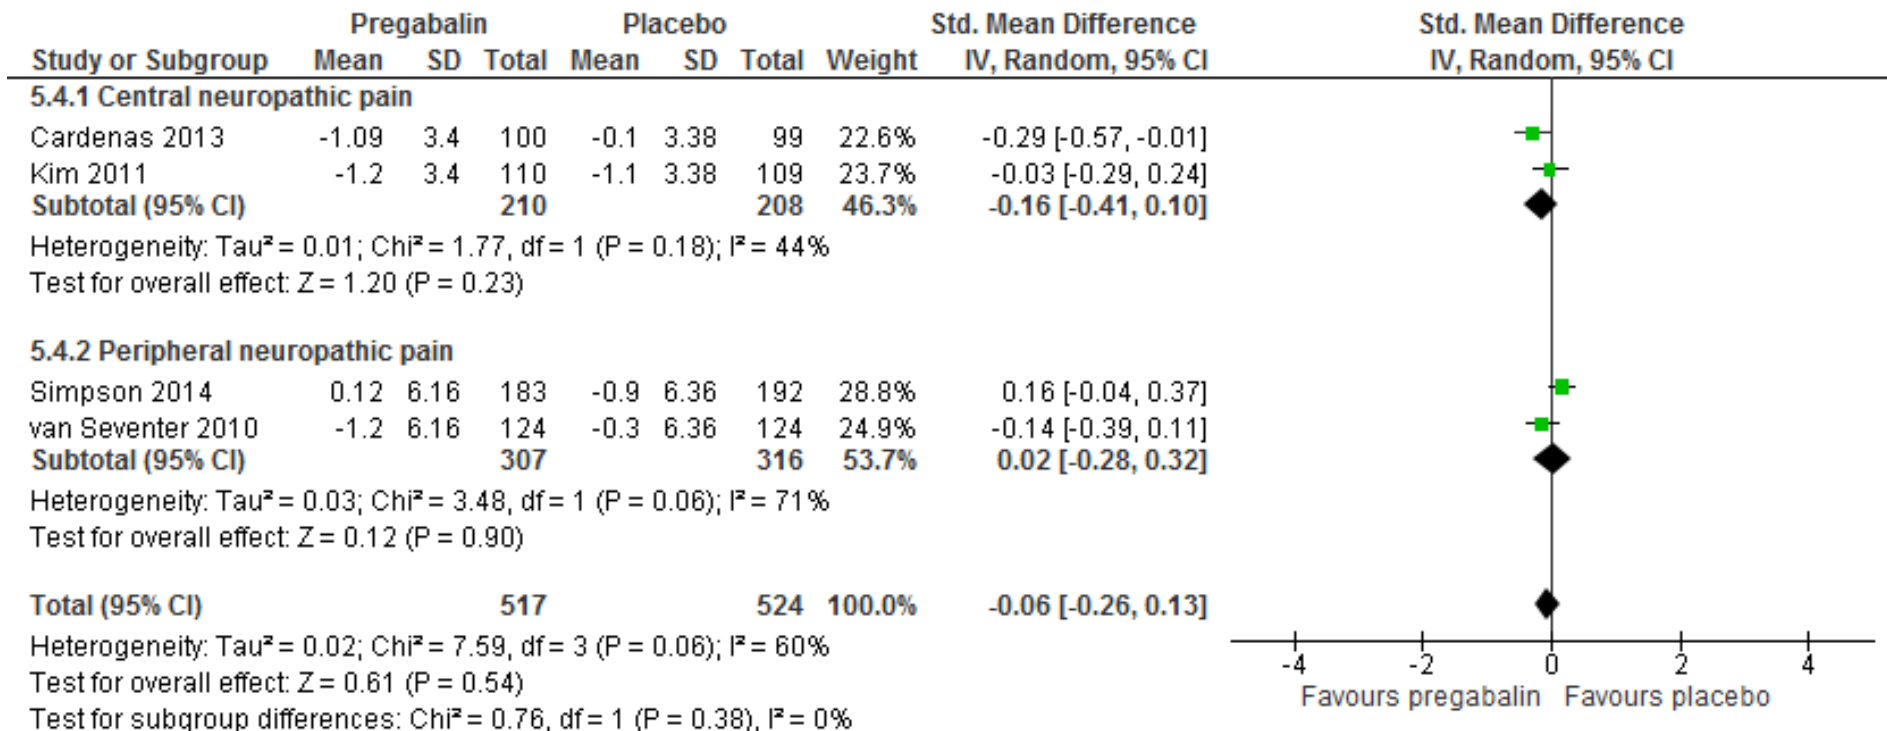

## Appendix 1: Search strategy for identifying RCTs assessing the effects of pregabalin for management of neuropathic pain

### MEDLINE

1. pain.mp. or Pain/
2. pain\*.mp.
3. analgesia/
4. analges\*.mp.
5. neuralgia/
6. 1 or 2 or 3 or 4 or 5
7. pregabalin/
8. clinical trials.mp. or Clinical Trial/
9. randomized clinical trial.mp.
10. controlled clinical trial.mp. or Controlled Clinical Trial/
11. double-blind trial.mp.
12. placebo.ab.
13. ((doubl\$ or tripl\$ or trebl\$) adj5 (blind\$ or mask\$)).ti,ab.
14. 8 or 9 or 10 or 11 or 12 or 13
15. 6 and 7 and 14
16. (animals not (animals and humans)).sh.
17. 15 not 16

### EMBASE

1. pain/ or neuropathic pain/
2. analgesi\*.mp.
3. 1 or 2
4. pregabalin.mp. or pregabalin/
5. controlled clinical trial/ or randomized clinical trial.mp.
6. double blind procedure/



1  
2  
3 7. placebo\*.ab.

4  
5 8. random\*.ab.

6  
7 9. ((doubl\* or trebl\* or tripl\*) adj25 (blind\* or mask\*)).ab.

8  
9 10. 5 or 6 or 7 or 8 or 9

10  
11 11. 3 and 4 and 10

12  
13  
14 **COCHRANE**

15 #1 pain

16 #2 analgesia

17 #3 neuropathic pain

18 #4 neuralgia

19 #5 #1 or #2 or #3 or #4

20 #6 pregabalin

21 #7 lyrica

22 #8 #6 or #7

23 #9 randomized controlled trial.pt

24 #10 controlled controlled trial.pt

25 #11 randomized.ti,ab

26 #12 groups.ti,ab

27 #13 placebo.ti,ab

28 #14 #9 or #10 or #11 or #12 or #13

29 #15 #5 and #8 and #14

1  
2  
3 **Appendix 2: List of excluded studies and reasons for exclusion**  
4

| Study ID     | Reference                                                                                                                                                                                                                                                                                                                                                                                                | Reason for exclusion                                             |
|--------------|----------------------------------------------------------------------------------------------------------------------------------------------------------------------------------------------------------------------------------------------------------------------------------------------------------------------------------------------------------------------------------------------------------|------------------------------------------------------------------|
| Al-Hihi 2017 | Al-Hihi E, Badgett RG. In moderate-to-severe sciatica, pregabalin did not reduce leg pain intensity or improve quality of life. <i>Annals of internal medicine</i> . 2017; (2):[Jc4 p.]. Available from: <a href="http://onlinelibrary.wiley.com/o/cochrane/clcentral/articles/558/CN-01394558/frame.html">http://onlinelibrary.wiley.com/o/cochrane/clcentral/articles/558/CN-01394558/frame.html</a> . | Not primary report of RCT                                        |
| Anon 2010    | Anonymous. Pregabalin effective in relieving post-traumatic peripheral neuropathic pain. <i>Australian Journal of Pharmacy</i> . 2010;91 (1086):82.                                                                                                                                                                                                                                                      | Not primary report of RCT                                        |
| Baron 2008   | Baron R, Brunnmuller U, Brassler M, May M, Binder A. Efficacy and safety of pregabalin in patients with diabetic peripheral neuropathy or postherpetic neuralgia: Open-label, non-comparative, flexible-dose study. <i>European Journal of Pain</i> . 2008;12(7):850-8.                                                                                                                                  | Open label; also no placebo control                              |
| Baron 2010   | Baron R, Freynhagen R, Tolle TR, Cloutier C, Leon T, Murphy TK, et al. The efficacy and safety of pregabalin in the treatment of neuropathic pain associated with chronic lumbosacral radiculopathy. <i>Pain</i> . 2010;150 (3):420-7.                                                                                                                                                                   | Randomization based on response to interventions in run-in phase |
| Boyle 2012   | Boyle J, Eriksson MEV, Gribble L, Gouni R, Johnsen S, Coppini DV, et al. Randomized, placebo-controlled comparison of amitriptyline, duloxetine, and pregabalin in patients with chronic diabetic peripheral neuropathic pain: Impact on pain, polysomnographic sleep, daytime functioning, and quality of life. <i>Diabetes care</i> . 2012;35 (12):2451-8.                                             | No placebo control; only placebo run in                          |

1  
2  
3  
4  
5  
6  
7  
8  
9  
10  
11  
12  
13  
14  
15  
16  
17  
18  
19  
20  
21  
22  
23  
24  
25  
26  
27  
28  
29  
30  
31  
32  
33  
34  
35  
36  
37  
38  
39  
40  
41  
42  
43  
44  
45  
46

|                 |                                                                                                                                                                                                                                                                                                                                                                                                                                                      |                                                                               |
|-----------------|------------------------------------------------------------------------------------------------------------------------------------------------------------------------------------------------------------------------------------------------------------------------------------------------------------------------------------------------------------------------------------------------------------------------------------------------------|-------------------------------------------------------------------------------|
| Calkins 2014    | Calkins A, Shurman J, Jaros M, Kim R, Shang G. Peripheral edema and weight gain in adult patients with painful diabetic peripheral neuropathy (DPN) receiving gabapentin enacarbil (GEN) or pregabalin enrolled in a randomized phase 2 trial. Neurology Conference: 66th American Academy of Neurology Annual Meeting, AAN. 2014;82(10 SUPPL. 1).                                                                                                   | Did not report neuropathic pain as an outcome                                 |
| Cardenas 2012   | Cardenas D, Nieshoff E, Suda K, Goto S, Kaneko T, Parsons B, et al. A 17-week, randomized, double-blind, placebo-controlled, parallel-group, multi-center trial of pregabalin for the treatment of chronic central neuropathic pain after spinal cord injury. Journal of pain. 2012;Conference: 31st Annual Scientific Meeting of the American Pain Society. Honolulu, HI United States. Conference Publication: (var.pagings). 13 (4 SUPPL. 1):S62. | Duplicate of study already included in the review: Duplicate of Cardenas 2013 |
| Cardenas 2013   | Cardenas DD, Nieshoff E, Parsons B, Sanin L, Kaneko T, Suzuki M, et al. Assessment of neuropathic pain during a 17-week, double-blind, placebo-controlled, trial of pregabalin in patients with spinal cord injury. Regional Anesthesia and Pain Medicine Conference: 11th Annual ASRA Pain Medicine Meeting Miami, FL United States Conference Publication:. 2013;38(1).                                                                            | Duplicate of study already included in the review: Duplicate of Cardenas 2013 |
| De Andrade 2015 | De Andrade DC, Teixeira MJ, Galhardoni R, Ferreira KASL, Malieno PB, Scisci N, et al. A phase III, randomized, double-blind, placebo-controlled trial to evaluate the efficacy and safety of pregabalin in the prevention and reduction of oxaliplatin-induced painful neuropathy (PreOx). Journal of Clinical Oncology Conference. 2015;33(15 SUPPL. 1).                                                                                            | Pain experienced during cancer chemotherapy                                   |

|                                                                |                      |                                                                                                                                                                                                                                                                                                                                                                                        |                                                                                            |
|----------------------------------------------------------------|----------------------|----------------------------------------------------------------------------------------------------------------------------------------------------------------------------------------------------------------------------------------------------------------------------------------------------------------------------------------------------------------------------------------|--------------------------------------------------------------------------------------------|
| 1<br>2<br>3                                                    | Duarte 2014          | Duarte MAG, Cardenas-Soto K, Lem M, Castillo C, Gibbons C, Freeman R. Efficacy of pregabalin in the treatment of prediabetic neuropathic pain. Neurology Conference: 66th American Academy of Neurology Annual Meeting, AAN. 2014;82(10 SUPPL. 1).                                                                                                                                     | No placebo control; evaluation in open-label run-in                                        |
| 4<br>5<br>6<br>7<br>8<br>9                                     | Eerdekens 2016       | Eerdekens M, Koch ED, Kok M, Sohns M, Forst T. Cebranopadol, a novel first-in-class analgesic: Efficacy, safety, tolerability in patients with pain due to diabetic peripheral neuropathy (U). Pain practice. 2016;Conference: 8th World Congress of the World Institute of Pain, WIP 2016. New York City, NY United States. Conference Publication: (var.pagings). 16 (SUPPL. 1):100. | Unclear how many participants were in each intervention arm                                |
| 10<br>11<br>12<br>13<br>14<br>15<br>16<br>17<br>18             | Freyenhagen 2006     | Freyenhagen R, Busche P, Konrad C, Balkenohl M. [Effectiveness and time to onset of pregabalin in patients with neuropathic pain]. Der Schmerz. 2006;20(4):285-8.                                                                                                                                                                                                                      | Non-English study: Duplicate of Freynhagen 2005                                            |
| 19<br>20<br>21<br>22<br>23<br>24<br>25<br>26<br>27<br>28<br>29 | Gabrani 2016         | Gabrani A, Dobi D, Tomori S, Berberi F, Como A, Kapisyzi MR. Efectiveness of pregabalin compared with amytriptilin in acute Herpetic Neuralgia. Neurology Conference: 68th American Academy of Neurology Annual Meeting, AAN. 2016;86(16 SUPPL. 1).                                                                                                                                    | Not a placebo-controlled study                                                             |
| 30<br>31<br>32<br>33<br>34                                     | Gilron 2011          | Gilron I, Wajsbrodt D, Therrien F, Lemay J. Pregabalin for peripheral neuropathic pain: a multicenter, enriched enrollment randomized withdrawal placebo-controlled trial. Clinical journal of pain. 2011;27(3):185-93.                                                                                                                                                                | Single-blinded Randomization to placebo/PGB occurred after a run in period of pre-gabalin? |
| 35<br>36<br>37<br>38<br>39<br>40                               | Gonzalez-Duarte 2016 | Gonzalez-Duarte A, Lem M, Diaz-Diaz E, Castillo C, Cardenas-Soto K. The Efficacy of Pregabalin in the Treatment of Prediabetic Neuropathic Pain. Clinical journal of pain. 2016;32(11):927-32.                                                                                                                                                                                         | Randomization based on response to interventions in run-in phase                           |

1  
2  
3  
4  
5  
6  
7  
8  
9  
10  
11  
12  
13  
14  
15  
16  
17  
18  
19  
20  
21  
22  
23  
24  
25  
26  
27  
28  
29  
30  
31  
32  
33  
34  
35  
36  
37  
38  
39  
40  
41  
42  
43  
44  
45  
46

Jenkins 2010

Jenkins T, Smart T, Hackman F, Cooke C, Tan K, Cheung R. Pregabalin in post-traumatic peripheral neuropathic pain: Efficient assessment of efficacy in a randomised, double-blind, placebo-controlled crossover study. *European Journal of Pain Supplements*. 2010;Conference: 3rd International Congress on Neuropathic Pain. Athens Greece. Conference Publication: (var.pagings). 4 (1):89.

Duplicate of study already excluded from the review: Jenkins 2012

Jenkins 2012

Jenkins TM, Smart TS, Hackman F, Cooke C, Tan KKC. Efficient assessment of efficacy in post-traumatic peripheral neuropathic pain patients: Pregabalin in a randomized, placebo-controlled, crossover study. *Journal of pain research*. 2012;5:243-50.

Phase I: proof of concept

Jensen-Dahm 2011

Jensen-Dahm C, Rowbotham MC, Reda H, Petersen KL. Effect of a single dose of pregabalin on herpes zoster pain. *Trials [Electronic Resource]*. 2011;12(55):28.

Phase 2

Kruszewski 2007

Kruszewski SP, Shane JA. Pregabalin in central neuropathic pain associated with spinal cord injury: a placebo-controlled trial. *Neurology*. 2007;68(24):2158-9.

Not primary report of RCT

Mishra 2012

Mishra S, Bhatnagar S, Goyal GN, Rana SPS, Upadhyaya SP. A comparative efficacy of amitriptyline, gabapentin, and pregabalin in neuropathic cancer pain: a prospective randomized double-blind placebo-controlled study. *American Journal of Hospice & Palliative Medicine*. 2012;29(3):177-82.

Pain experienced during cancer chemotherapy

|    |               |                                                                                                                                                                                                                                                                                                                                                                                                                                      |                                                                                    |
|----|---------------|--------------------------------------------------------------------------------------------------------------------------------------------------------------------------------------------------------------------------------------------------------------------------------------------------------------------------------------------------------------------------------------------------------------------------------------|------------------------------------------------------------------------------------|
| 1  |               |                                                                                                                                                                                                                                                                                                                                                                                                                                      |                                                                                    |
| 2  |               |                                                                                                                                                                                                                                                                                                                                                                                                                                      |                                                                                    |
| 3  | Morrison 2015 | Morrison S, Parson H, Vinik AI. Pregabalin positively affects subjective pain, falls risk, and gait in persons with diabetic peripheral neuropathy. <i>Diabetes</i> . 2015;Conference: 75th Scientific Sessions of the American Diabetes Association. Boston, MA United States. Conference Publication: (var.pagings). 64 (SUPPL. 1):A164.                                                                                           | Cross-over trial that did not report data from first phase                         |
| 4  |               |                                                                                                                                                                                                                                                                                                                                                                                                                                      |                                                                                    |
| 5  |               |                                                                                                                                                                                                                                                                                                                                                                                                                                      |                                                                                    |
| 6  |               |                                                                                                                                                                                                                                                                                                                                                                                                                                      |                                                                                    |
| 7  |               |                                                                                                                                                                                                                                                                                                                                                                                                                                      |                                                                                    |
| 8  |               |                                                                                                                                                                                                                                                                                                                                                                                                                                      |                                                                                    |
| 9  |               |                                                                                                                                                                                                                                                                                                                                                                                                                                      |                                                                                    |
| 10 |               |                                                                                                                                                                                                                                                                                                                                                                                                                                      |                                                                                    |
| 11 |               |                                                                                                                                                                                                                                                                                                                                                                                                                                      |                                                                                    |
| 12 | Parsons 2013  | Parsons B, Emir B. Examining the time-to-improvement of pain in patients with chronic neuropathic pain due to spinal cord injury. <i>Journal of pain</i> . 2013;Conference: 32nd Annual Scientific Meeting of the American Pain Society. New Orleans, LA United States. Conference Publication: (var.pagings). 14 (4 SUPPL. 1):S60.                                                                                                  | Not primary report of RCT: report of 2 separate primary studies included in review |
| 13 |               |                                                                                                                                                                                                                                                                                                                                                                                                                                      |                                                                                    |
| 14 |               |                                                                                                                                                                                                                                                                                                                                                                                                                                      |                                                                                    |
| 15 |               |                                                                                                                                                                                                                                                                                                                                                                                                                                      |                                                                                    |
| 16 |               |                                                                                                                                                                                                                                                                                                                                                                                                                                      |                                                                                    |
| 17 |               |                                                                                                                                                                                                                                                                                                                                                                                                                                      |                                                                                    |
| 18 |               |                                                                                                                                                                                                                                                                                                                                                                                                                                      |                                                                                    |
| 19 | Parsons 2015  | Parsons B, Emir B, Knapp L. Examining the Time to Improvement of Sleep Interference With Pregabalin in Patients With Painful Diabetic Peripheral Neuropathy and Postherpetic Neuralgia. <i>American journal of therapeutics</i> . 2015;22(4):257-68.                                                                                                                                                                                 | Not primary report of RCT                                                          |
| 20 |               |                                                                                                                                                                                                                                                                                                                                                                                                                                      |                                                                                    |
| 21 |               |                                                                                                                                                                                                                                                                                                                                                                                                                                      |                                                                                    |
| 22 |               |                                                                                                                                                                                                                                                                                                                                                                                                                                      |                                                                                    |
| 23 |               |                                                                                                                                                                                                                                                                                                                                                                                                                                      |                                                                                    |
| 24 |               |                                                                                                                                                                                                                                                                                                                                                                                                                                      |                                                                                    |
| 25 |               |                                                                                                                                                                                                                                                                                                                                                                                                                                      |                                                                                    |
| 26 | Parsons 2012  | Parsons B, Nieshoff E, Cardenas D, Sanin L, Kaneko T, Suzuki M, et al. Weekly assessments of pain and sleep during a 17-week, double-blind, placebo-controlled trial of pregabalin for the treatment of chronic neuropathic pain after spinal cord injury. <i>Neurology</i> . 2012;Conference: 64th American Academy of Neurology Annual Meeting. New Orleans, LA United States. Conference Publication: (var.pagings). 79 (11):e88. | Duplicate of study already included in the review: Duplicate of Cardenas 2013      |
| 27 |               |                                                                                                                                                                                                                                                                                                                                                                                                                                      |                                                                                    |
| 28 |               |                                                                                                                                                                                                                                                                                                                                                                                                                                      |                                                                                    |
| 29 |               |                                                                                                                                                                                                                                                                                                                                                                                                                                      |                                                                                    |
| 30 |               |                                                                                                                                                                                                                                                                                                                                                                                                                                      |                                                                                    |
| 31 |               |                                                                                                                                                                                                                                                                                                                                                                                                                                      |                                                                                    |
| 32 |               |                                                                                                                                                                                                                                                                                                                                                                                                                                      |                                                                                    |
| 33 |               |                                                                                                                                                                                                                                                                                                                                                                                                                                      |                                                                                    |
| 34 |               |                                                                                                                                                                                                                                                                                                                                                                                                                                      |                                                                                    |
| 35 |               |                                                                                                                                                                                                                                                                                                                                                                                                                                      |                                                                                    |
| 36 |               |                                                                                                                                                                                                                                                                                                                                                                                                                                      |                                                                                    |
| 37 |               |                                                                                                                                                                                                                                                                                                                                                                                                                                      |                                                                                    |
| 38 |               |                                                                                                                                                                                                                                                                                                                                                                                                                                      |                                                                                    |
| 39 |               |                                                                                                                                                                                                                                                                                                                                                                                                                                      |                                                                                    |
| 40 |               |                                                                                                                                                                                                                                                                                                                                                                                                                                      |                                                                                    |
| 41 |               |                                                                                                                                                                                                                                                                                                                                                                                                                                      |                                                                                    |
| 42 |               |                                                                                                                                                                                                                                                                                                                                                                                                                                      |                                                                                    |
| 43 |               |                                                                                                                                                                                                                                                                                                                                                                                                                                      |                                                                                    |
| 44 |               |                                                                                                                                                                                                                                                                                                                                                                                                                                      |                                                                                    |
| 45 |               |                                                                                                                                                                                                                                                                                                                                                                                                                                      |                                                                                    |
| 46 |               |                                                                                                                                                                                                                                                                                                                                                                                                                                      |                                                                                    |

1  
2  
3  
4  
5  
6  
7  
8  
9  
10  
11  
12  
13  
14  
15  
16  
17  
18  
19  
20  
21  
22  
23  
24  
25  
26  
27  
28  
29  
30  
31  
32  
33  
34  
35  
36  
37  
38  
39  
40  
41  
42  
43  
44  
45  
46

Parsons 2015 (Ann  
Neur)

Parsons B, Shang N, Yan P, Fan D. Efficacy and safety of pregabalin for postherpetic neuralgia in Chinese patients. *Annals of Neurology*. 2015;Conference: 140th Annual Meeting of the American Neurological Association, ANA 2015. Chicago, IL United States. Conference Publication: (var.pagings). 78 (SUPPL. 19):S92.

Duplicate of study already included in the review: Duplicate of Liu 2015

Puiu 2015

Puiu T, Kairys A, Pauer L, Schmidt-Wilcke T, Ichesco E, Hampson J, et al. Alterations in brain gray matter volume are associated with reduced evoked-pain connectivity following acute pregabalin administration. *Neurology Conference: 67th American Academy of Neurology Annual Meeting, AAN*. 2015;84(SUPPL. 14).

Included participants with fibromyalgia

Raskin 2014

Raskin P, Huffman C, Toth C, Asmus MJ, Messig M, Sanchez RJ, et al. Pregabalin in patients with inadequately treated painful diabetic peripheral neuropathy: a randomized withdrawal trial. *Clinical journal of pain*. 2014;30(5):379-90.

Randomization based on response to interventions in run-in phase

Satoh 2011

Satoh J, Yagihashi S, Baba M, Suzuki M, Arakawa A, Yoshiyama T. Efficacy and safety evaluation of pregabalin treatment over 52weeks in patients with diabetic neuropathic pain extended after a double-blind placebo-controlled trial. *Journal of diabetes investigation*. 2011;2 (6):457-63.

Open label; also no placebo control

|                                                                                                                |                   |                                                                                                                                                                                                                                                                                                                                                               |                                                                      |
|----------------------------------------------------------------------------------------------------------------|-------------------|---------------------------------------------------------------------------------------------------------------------------------------------------------------------------------------------------------------------------------------------------------------------------------------------------------------------------------------------------------------|----------------------------------------------------------------------|
| 1<br>2<br>3<br>4<br>5<br>6<br>7<br>8<br>9<br>10<br>11                                                          | van Seventer 2009 | Van Seventer R, Murphy K, Temple J, McKenzie I, Serpell M, Toth C, et al. Pregabalin is effective in the treatment of posttraumatic peripheral neuropathic pain. Journal of pain. 2009;Conference: 28th Annual Scientific Meeting of the American Pain Society, APS. San Diego, CA United States. Conference Publication: (var.pagings). 10 (4 SUPPL. 1):S35. | Duplicate of study already included in the review: Van Seventer 2010 |
| 12<br>13<br>14<br>15<br>16<br>17<br>18                                                                         | Vinik 2014- 1     | Vinik A, Rosenstock J, Sharma U, Feins K, Hsu C, Merante D. Efficacy and safety of mirogabalin (DS-5565) for the treatment of diabetic peripheral neuropathic pain: A randomized, double-blind, placebo- and active comparator-controlled, adaptive proof-of-concept phase 2 study. Diabetes care. 2014;37 (12):3253-61.                                      | Proof of concept study                                               |
| 19<br>20<br>21<br>22<br>23<br>24<br>25<br>26<br>27                                                             | Vinik 2014-2      | Vinik A, Sharma U, Feins K, Hsu C, Merante D. Central nervous system safety and tolerability of DS-5565: A randomized, double-blind, placebo-and active comparator-controlled phase II study in diabetic peripheral neuropathic pain. Neurology Conference: 66th American Academy of Neurology Annual Meeting, AAN. 2014;82(10 SUPPL. 1).                     | Duplicate of study already excluded from the review (Vinik 2014-1)   |
| 28<br>29<br>30<br>31<br>32<br>33<br>34<br>35<br>36<br>37<br>38<br>39<br>40<br>41<br>42<br>43<br>44<br>45<br>46 | Vinik 2014-3      | Vinik A, Sharma U, Feins K, Hsu C, Merante D. DS-5565 for the treatment of diabetic peripheral neuropathic pain: Randomized, double-blind, placebo-and active comparator-controlled phase ii study. Neurology Conference: 66th American Academy of Neurology Annual Meeting, AAN. 2014;82(10 SUPPL. 1).                                                       | Duplicate of study already excluded from the review (Vinik 2014-1)   |



1  
2  
3  
4  
5  
6  
7  
8  
9  
10  
11  
12  
13  
14  
15  
16  
17  
18  
19  
20  
21  
22  
23  
24  
25  
26  
27  
28  
29  
30  
31  
32  
33  
34  
35  
36  
37  
38  
39  
40  
41  
42  
43  
44  
45  
46

|              |                                                                                                                                                                                                                                                                                                                                                                                                                     |                                                                    |
|--------------|---------------------------------------------------------------------------------------------------------------------------------------------------------------------------------------------------------------------------------------------------------------------------------------------------------------------------------------------------------------------------------------------------------------------|--------------------------------------------------------------------|
| Vinik 2014-4 | <p>Vinik AI, Sharma U, Feins K, Hsu C, Merante D. Safety/tolerability profile of DS-5565: A new potent, specific alpha2-delta ligand for the treatment of diabetic peripheral neuropathic pain. Diabetes. 2014;Conference: 74th Scientific Sessions of the American Diabetes Association. San Francisco, CA United States. Conference Publication: (var.pagings). 63 (SUPPL. 1):A298.</p>                           | Duplicate of study already excluded from the review (Vinik 2014-1) |
| Vinik 2014-5 | <p>Vinik AI, Sharma U, Feins K, Hsu C, Merante D. A randomized, double-blind, placebo- and active comparator (pregabalin)-controlled phase II study of DS-5565 for the treatment of diabetic peripheral neuropathic pain. Diabetes. 2014;Conference: 74th Scientific Sessions of the American Diabetes Association. San Francisco, CA United States. Conference Publication: (var.pagings). 63 (SUPPL. 1):A294.</p> | Duplicate of study already excluded from the review (Vinik 2014-1) |

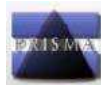

# PRISMA 2009 Checklist

| Section/topic                      | #  | Checklist item                                                                                                                                                                                                                                                                                              | Reported on page # |
|------------------------------------|----|-------------------------------------------------------------------------------------------------------------------------------------------------------------------------------------------------------------------------------------------------------------------------------------------------------------|--------------------|
| <b>TITLE</b>                       |    |                                                                                                                                                                                                                                                                                                             |                    |
| Title                              | 1  | Identify the report as a systematic review, meta-analysis, or both.                                                                                                                                                                                                                                         | 1                  |
| <b>ABSTRACT</b>                    |    |                                                                                                                                                                                                                                                                                                             |                    |
| Structured summary                 | 2  | Provide a structured summary including, as applicable: background; objectives; data sources; study eligibility criteria, participants, and interventions; study appraisal and synthesis methods; results; limitations; conclusions and implications of key findings; systematic review registration number. | 2-3                |
| <b>INTRODUCTION</b>                |    |                                                                                                                                                                                                                                                                                                             |                    |
| Rationale                          | 3  | Describe the rationale for the review in the context of what is already known.                                                                                                                                                                                                                              | 4-5                |
| Objectives                         | 4  | Provide an explicit statement of questions being addressed with reference to participants, interventions, comparisons, outcomes, and study design (PICOS).                                                                                                                                                  | 5                  |
| <b>METHODS</b>                     |    |                                                                                                                                                                                                                                                                                                             |                    |
| Protocol and registration          | 5  | Indicate if a review protocol exists, if and where it can be accessed (e.g., Web address), and, if available, provide registration information including registration number.                                                                                                                               | Suppl.             |
| Eligibility criteria               | 6  | Specify study characteristics (e.g., PICOS, length of follow-up) and report characteristics (e.g., years considered, language, publication status) used as criteria for eligibility, giving rationale.                                                                                                      | 5                  |
| Information sources                | 7  | Describe all information sources (e.g., databases with dates of coverage, contact with study authors to identify additional studies) in the search and date last searched.                                                                                                                                  | 5                  |
| Search                             | 8  | Present full electronic search strategy for at least one database, including any limits used, such that it could be repeated.                                                                                                                                                                               | Appendix 1         |
| Study selection                    | 9  | State the process for selecting studies (i.e., screening, eligibility, included in systematic review, and, if applicable, included in the meta-analysis).                                                                                                                                                   | 5                  |
| Data collection process            | 10 | Describe method of data extraction from reports (e.g., piloted forms, independently, in duplicate) and any processes for obtaining and confirming data from investigators.                                                                                                                                  | 6                  |
| Data items                         | 11 | List and define all variables for which data were sought (e.g., PICOS, funding sources) and any assumptions and simplifications made.                                                                                                                                                                       | 6                  |
| Risk of bias in individual studies | 12 | Describe methods used for assessing risk of bias of individual studies (including specification of whether this was done at the study or outcome level), and how this information is to be used in any data synthesis.                                                                                      | 6                  |
| Summary measures                   | 13 | State the principal summary measures (e.g., risk ratio, difference in means).                                                                                                                                                                                                                               | 6                  |
| Synthesis of results               | 14 | Describe the methods of handling data and combining results of studies, if done, including measures of consistency (e.g., $I^2$ ) for each meta-analysis.                                                                                                                                                   | 6                  |

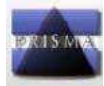

# PRISMA 2009 Checklist

| Section/topic                 | #  | Checklist item                                                                                                                                                                                           | Reported on page # |
|-------------------------------|----|----------------------------------------------------------------------------------------------------------------------------------------------------------------------------------------------------------|--------------------|
| Risk of bias across studies   | 15 | Specify any assessment of risk of bias that may affect the cumulative evidence (e.g., publication bias, selective reporting within studies).                                                             | 6                  |
| Additional analyses           | 16 | Describe methods of additional analyses (e.g., sensitivity or subgroup analyses, meta-regression), if done, indicating which were pre-specified.                                                         | 6                  |
| <b>RESULTS</b>                |    |                                                                                                                                                                                                          |                    |
| Study selection               | 17 | Give numbers of studies screened, assessed for eligibility, and included in the review, with reasons for exclusions at each stage, ideally with a flow diagram.                                          | 7                  |
| Study characteristics         | 18 | For each study, present characteristics for which data were extracted (e.g., study size, PICOS, follow-up period) and provide the citations.                                                             | 7                  |
| Risk of bias within studies   | 19 | Present data on risk of bias of each study and, if available, any outcome level assessment (see item 12).                                                                                                | 7                  |
| Results of individual studies | 20 | For all outcomes considered (benefits or harms), present, for each study: (a) simple summary data for each intervention group (b) effect estimates and confidence intervals, ideally with a forest plot. | 7-19               |
| Synthesis of results          | 21 | Present results of each meta-analysis done, including confidence intervals and measures of consistency.                                                                                                  | 7-19               |
| Risk of bias across studies   | 22 | Present results of any assessment of risk of bias across studies (see Item 15).                                                                                                                          | 7-19               |
| Additional analysis           | 23 | Give results of additional analyses, if done (e.g., sensitivity or subgroup analyses, meta-regression [see Item 16]).                                                                                    | 7-19               |
| <b>DISCUSSION</b>             |    |                                                                                                                                                                                                          |                    |
| Summary of evidence           | 24 | Summarize the main findings including the strength of evidence for each main outcome; consider their relevance to key groups (e.g., healthcare providers, users, and policy makers).                     | 20                 |
| Limitations                   | 25 | Discuss limitations at study and outcome level (e.g., risk of bias), and at review-level (e.g., incomplete retrieval of identified research, reporting bias).                                            | 22                 |
| Conclusions                   | 26 | Provide a general interpretation of the results in the context of other evidence, and implications for future research.                                                                                  | 24                 |
| <b>FUNDING</b>                |    |                                                                                                                                                                                                          |                    |
| Funding                       | 27 | Describe sources of funding for the systematic review and other support (e.g., supply of data); role of funders for the systematic review.                                                               | 24                 |

From: Moher D, Liberati A, Tetzlaff J, Altman DG, The PRISMA Group (2009). Preferred Reporting Items for Systematic Reviews and Meta-Analyses: The PRISMA Statement. PLoS Med 6(6): e1000097. doi:10.1371/journal.pmed1000097

For more information, visit: [www.prisma-statement.org](http://www.prisma-statement.org).

# BMJ Open

## Benefits and harms of pregabalin in the management of neuropathic pain: a rapid review and meta-analysis of randomized clinical trials

|                                 |                                                                                                                                                                                                                                                                                                                                                                                                                          |
|---------------------------------|--------------------------------------------------------------------------------------------------------------------------------------------------------------------------------------------------------------------------------------------------------------------------------------------------------------------------------------------------------------------------------------------------------------------------|
| Journal:                        | <i>BMJ Open</i>                                                                                                                                                                                                                                                                                                                                                                                                          |
| Manuscript ID                   | bmjopen-2018-023600.R1                                                                                                                                                                                                                                                                                                                                                                                                   |
| Article Type:                   | Research                                                                                                                                                                                                                                                                                                                                                                                                                 |
| Date Submitted by the Author:   | 23-Aug-2018                                                                                                                                                                                                                                                                                                                                                                                                              |
| Complete List of Authors:       | Onakpoya, Igho; University of Oxford, Primary Care Health Sciences<br>Thomas, Elizabeth; Bond University Faculty of Health Sciences and<br>Medicine, Faculty of Health Sciences and Medicine<br>Lee, Joseph; University of Oxford, Nuffield Department of Primary Care<br>Health Sciences<br>Goldacre, Ben; University of Oxford, Primary Care Health Sciences<br>Heneghan, Carl; Oxford University, Primary Health Care |
| <b>Primary Subject Heading</b>: | Evidence based practice                                                                                                                                                                                                                                                                                                                                                                                                  |
| Secondary Subject Heading:      | Nutrition and metabolism, Pharmacology and therapeutics                                                                                                                                                                                                                                                                                                                                                                  |
| Keywords:                       | pregabalin, benefits, harms, systematic review, meta-analysis                                                                                                                                                                                                                                                                                                                                                            |
|                                 |                                                                                                                                                                                                                                                                                                                                                                                                                          |

SCHOLARONE™  
Manuscripts

1  
2  
3 **Benefits and harms of pregabalin in the management of neuropathic pain: a rapid**  
4 **review and meta-analysis of randomized clinical trials**  
5  
6  
7  
8  
9  
10  
11  
12  
13  
14

15 Igho J Onakpoya, research fellow<sup>1</sup>, Elizabeth T Thomas, medical student<sup>2</sup>, Joseph Lee, nihr  
16 in practice fellow<sup>1</sup>, Ben Goldacre, senior clinical research fellow<sup>1</sup>, Carl J Heneghan, director<sup>1</sup>  
17  
18  
19  
20  
21

22 <sup>1</sup>University of Oxford, Centre for Evidence-Based Medicine, Nuffield Department of Primary  
23 Care Health Sciences, Radcliffe Primary Care Building, Radcliffe Observatory Quarter,  
24 Oxford, United Kingdom OX2 6GG  
25  
26  
27

28 <sup>2</sup>Faculty of Health Sciences and Medicine, Bond University, 14 University Drive, Robina,  
29 Australia QLD 4226  
30  
31  
32  
33  
34  
35  
36  
37  
38

39 **Correspondence to** IJ Onakpoya [igho.onakpoya@phc.ox.ac.uk](mailto:igho.onakpoya@phc.ox.ac.uk)  
40  
41  
42  
43  
44  
45  
46  
47  
48  
49  
50  
51  
52  
53  
54  
55  
56  
57  
58  
59  
60

## ABSTRACT

**Objective** To assess the benefits and harms of pregabalin in the management of neuropathic pain

**Design** Rapid review and meta-analysis of phase III randomized placebo-controlled trials.

**Participants** Adults aged 18 and above with neuropathic pain defined according to the International Association for the Study of Pain (IASP) criteria.

**Interventions** Pregabalin or placebo.

**Primary and secondary outcome measures** Our primary outcomes were pain (as measured using validated scales) and adverse events. Our secondary outcomes were sleep disturbance, quality of life (QOL), patient global impression of change (PGIC), clinician global impression (CGI) scale, anxiety and depression scores, overall discontinuations and discontinuations because of adverse events.

**Results** We included 28 trials comprising 6087 participants. The neuropathic pain conditions studied were diabetic peripheral neuropathy, post-herpetic neuralgia, herpes zoster, sciatica (radicular pain), post-stroke pain and spinal cord injury-related pain. Patients who took pregabalin reported significant reductions in pain (numerical rating scale (NRS)) compared to placebo, SMD -0.49 (95% CI -0.66 to -0.32,  $P < 0.00001$ ); very low quality evidence. Pregabalin significantly reduced sleep interference scores (NRS) compared with placebo, SMD -0.38 (95% CI -0.50 to -0.26,  $P < 0.00001$ ) moderate quality evidence. Pregabalin significantly increased the risk of adverse events compared with placebo, RR 1.33 (95% CI 1.23 to 1.44,  $P < 0.00001$ , low quality evidence). The risks of experiencing weight gain, somnolence, dizziness, peripheral oedema, fatigue, visual disturbances, ataxia, non-peripheral oedema, vertigo and euphoria were significantly increased with pregabalin. Pregabalin was significantly more likely than placebo to lead to discontinuation of the drug because of adverse events, RR 1.91 (95% CI 1.54 to 2.37,  $P < 0.00001$ ), low quality evidence.

1  
2  
3 **Conclusion** Pregabalin has beneficial effects on some symptoms of neuropathic pain.  
4  
5 However, its use significantly increases the risk of a number of adverse events and  
6  
7 discontinuation due to adverse events. The quality of the evidence from journal publications  
8  
9 is low.  
10

#### 11 12 13 14 15 16 **Strengths and limitations of the study**

- 17
- 18 ● We used the Cochrane criteria to assess the risk of bias.
- 19
- 20
- 21 ● This is the first review that rates the quality of the evidence for each outcome assessed.
- 22
- 23 ● The review may be prone to sampling bias, and we may have missed potentially eligible
- 24 studies.
- 25
- 26
- 27
- 28 ● We did not assess the extent to which different doses of pregabalin influenced the
- 29 outcomes.
- 30
- 31
- 32
- 33
- 34
- 35
- 36
- 37
- 38
- 39
- 40
- 41
- 42
- 43
- 44
- 45
- 46
- 47
- 48
- 49
- 50
- 51
- 52
- 53
- 54
- 55
- 56
- 57
- 58
- 59
- 60

## INTRODUCTION

Pregabalin is a gabapentinoid licensed for treatment of neurologic disorders. It is one of the earlier drugs approved by the United States Food and Drug Administration (FDA) (2004) for the treatment of painful diabetic neuropathy (PDN) and post-herpetic neuralgia (PHN).<sup>1</sup>

Pregabalin is thought to exert its analgesic action through antagonistic activity at the voltage gated Ca<sup>2+</sup> channels where it binds to the alpha-2-delta subunit.<sup>1,2</sup>

Prescriptions of pregabalin (and gabapentin) have markedly increased over the last few years. In the US, prescriptions for pregabalin rose from 39 million in 2012 to 64 million in 2016 (annual prescription costs increased from approximately \$2 billion to \$4.4 billion over the same period).<sup>3</sup> In the UK, pregabalin use increased 350% over a five year period between 2008 and 2013.<sup>4</sup> In England alone, there were over 6.2 million prescriptions of pregabalin across GP practices in 2017 costing about \$440 million.<sup>5</sup>

Pregabalin is recommended as first-line pharmacologic agent for management of neuropathic pain<sup>6</sup>. There is, however, some evidence of increased mortality attributed pregabalin in the UK,<sup>7</sup> and this has led some authors to caution clinicians about the risk of harms when prescribing.<sup>8</sup> The risks are thought to be particularly acute for patients who use heroin and those who misuse gabapentinoids. Indeed, the UK government is soon to classify the drug as a class C controlled substance because of its abuse potential and increased reports of deaths attributed to its use.<sup>9</sup> Practicing clinicians have also recently called for the evidence for the effectiveness of pregabalin to be re-examined in the light of its potential to cause harms.<sup>3,4</sup>

Rapid reviews use accelerated methods to identify and synthesize the evidence from the literature in order to meet the needs of target audiences including policy makers, healthcare



1  
2  
3 professionals and patient groups.<sup>10</sup> The objective of this rapid review was therefore to  
4  
5 evaluate the evidence for benefits and harms of pregabalin in the treatment of neuropathic  
6  
7 pain in adults, using evidence from published randomized clinical trials (RCTs).  
8  
9

## 11 **METHODS**

13 We conducted electronic searches in the following databases: Medline, Embase, and  
14  
15 Cochrane Central Register of Controlled Trials (CENTRAL). We searched each database  
16  
17 from inception till January 2018. No language restrictions were imposed. [See appendix 1 for  
18  
19 a full search strategy]. We also hand searched the bibliography of eligible studies. [See  
20  
21 appendix 2 for the full protocol].  
22  
23  
24  
25

26 We included phase III double-blinded placebo-controlled RCTs (efficacy studies) assessing  
27  
28 the effects of pregabalin on neuropathic pain in adults aged 18 years and above. We included  
29  
30 studies on neuropathic pain based on the definition of the International Association for the  
31  
32 Study of Pain (IASP) definition.<sup>11</sup> These included trials on diabetic neuropathy, HIV-related  
33  
34 neuropathy, lumbar radiculopathy, post-herpetic neuralgia, and chronic postsurgical pain. We  
35  
36 included RCTs irrespective of study size and duration of intervention. If we included RCTs  
37  
38 with a cross-over design, we used data from the first phase of the study. We excluded phase  
39  
40 IV trials because they are typically unblinded. We also excluded studies that combined  
41  
42 pregabalin with other types of pain intervention because the effects of such interventions  
43  
44 would not be exclusively due to the actions of pregabalin; however, co-interventions used as  
45  
46 rescue medication were allowed. Trials that randomized participants based on response to  
47  
48 pregabalin therapy in the run-in phase were also excluded. Our main outcomes were pain (as  
49  
50 measured using validated scales because such scales enhance the credibility of the measured  
51  
52 outcomes<sup>12</sup>) and adverse events. Our secondary outcomes were sleep disturbance, quality of  
53  
54  
55  
56  
57  
58  
59  
60

1  
2  
3 life (QOL), patient global impression of change (PGIC), clinician global impression (CGI)  
4  
5 scale, anxiety and depression, overall discontinuations and discontinuations because of  
6  
7 adverse events.  
8  
9

10  
11 The risk of bias for each included study was rated using the Cochrane criteria.<sup>13</sup> Two  
12  
13 reviewers (IJO and ETT) independently screened abstracts and determined study eligibility.  
14  
15 Disagreements were resolved through discussion. Three reviewers (IJO (8 studies), ETT (8  
16  
17 studies) and JL (10 studies)) independently extracted data according to pre-defined criteria  
18  
19 into customized excel spreadsheets. The extracted data were independently verified by two  
20  
21 reviewers (ETT and IJO). Any disagreements were resolved through discussion.. For each  
22  
23 included study, we extracted data on study ID, settings, populations, interventions, outcomes  
24  
25 and results.  
26  
27  
28  
29  
30

31 Using the random effects model (Mantel-Haenszel) of the standard meta-analysis software  
32  
33 (RevMan 5.3),<sup>14</sup> we computed standardized mean differences (SMDs) and 95% confidence  
34  
35 intervals (CIs) for continuous outcomes and risk ratios with 95% CI for binary outcomes. We  
36  
37 used pre- to post-intervention changes to assess intervention effects between pregabalin and  
38  
39 placebo. Where studies reported data on change from baseline but did not report standard  
40  
41 deviations (SDs), we imputed SDs (five studies) based on the SD of other studies included in  
42  
43 the meta-analysis.<sup>15</sup> We used a value of  $P=0.05$  as our threshold for statistical significance.  
44  
45 We assessed heterogeneity using the I-squared statistic: values of 25%, 50% and 75% judged  
46  
47 mild, moderate and substantial heterogeneity respectively. We investigated heterogeneity  
48  
49 using subgroup (based on central or peripheral neuropathic pain) and sensitivity (based on  
50  
51 study quality and/or duration) analyses. We used a funnel plot to assess publication bias.  
52  
53  
54  
55  
56  
57  
58  
59  
60

1  
2  
3 One reviewer (ETT) entered the data on benefits on RevMan, and these were independently  
4 verified by a second reviewer (IJO). One reviewer (IJO) entered the data on harms onto  
5 RevMan, and these were independently verified by a second reviewer (ETT).. Using the  
6 GRADEpro software (version 3.6),<sup>16</sup> we rated the overall quality of the body of evidence for  
7 each outcome using the Grading of Recommendation, Assessment, Development, and  
8 Evaluation (GRADE)<sup>17</sup> criteria which examines the following domains: study design; risk of  
9 bias; inconsistency; indirectness; and imprecision.  
10  
11  
12  
13  
14  
15  
16  
17  
18  
19

### 20 **Patient public involvement**

21 Because this was a rapid review, we did not enlist the services of patient representatives in  
22 this research.  
23  
24  
25  
26  
27

### 28 **RESULTS**

29 Our searches identified 1349 non-duplicate citations, out of which 62 articles were  
30 considered eligible (Figure 1). We excluded 34 articles that did not fit our inclusion criteria.  
31 [See Appendix 3 for list of excluded studies and the reasons for exclusion]. In total, we  
32 included 28 studies<sup>18 19 20 21 22 23 24 25 26 27 28 29 30 31 32 33 34 35 36 37 38 39 40 41 42 43 44 45</sup>  
33 comprising 6087 participants (Table 1). The intervention duration was between three and 20  
34 weeks (median 8 weeks) and all the trials were industry funded.  
35  
36  
37  
38  
39  
40  
41  
42  
43  
44  
45

46 Twenty three studies examined the effectiveness of pregabalin in treatment of peripheral  
47 neuropathic pain including DPN, PHN and Herpes zoster (HZ) (Table 1). Five studies  
48 examined the effectiveness of pregabalin for treating central neuropathic pain including  
49 sciatica (radicular pain), post-stroke pain and spinal cord injury-related pain. Twenty five  
50 studies were conducted in two or more centres. Outcome measures for pain included  
51  
52  
53  
54  
55  
56  
57  
58  
59  
60

1  
2  
3 numerical rating scale (NRS), visual assessment scale (VAS), Short-Form McGill Pain  
4  
5 Questionnaire visual assessment scale (SF-MPQ VAS), and SF-MPQ personal pain intensity  
6  
7 (SF-MPQ PPI) index [see Table 1 for full characteristics of included studies]. The overall risk  
8  
9 of bias in the included studies was moderate to high (Figures 2 and 3). This was mainly due  
10  
11 to inadequate reporting of blinding procedures, selective outcome reporting and financial  
12  
13 conflicts of interest amongst study authors. [See appendix 4 for the risk of bias judgements].  
14  
15

## 16 17 18 **Pain**

19  
20 Twenty one studies provided adequate data on pain using the NRS or variants of it to allow  
21  
22 meta-analysis. Meta-analysis showed a significant reduction in pain scores with pregabalin  
23  
24 compared with placebo, SMD -0.49 (95% CI -0.66 to -0.32,  $P < 0.00001$ ,  $I^2 = 88\%$ ; Figure 4).  
25  
26 Visual inspection of a funnel plot showed that the studies were almost symmetrically  
27  
28 distributed around the mean difference for all trials (Figure S1); trim and fill analyses showed  
29  
30 that the subsequent addition of studies with smaller sample sizes did not change the direction  
31  
32 of effect. The effect was significant for peripheral neuropathic pain ( $P < 0.00001$ ), but not for  
33  
34 central neuropathic pain ( $P = 0.08$ ; Appendix table 1). The overall quality of the evidence was  
35  
36 very low (Summary of Findings (SoF) Table 1). Sensitivity analyses revealed similar  
37  
38 direction of effects (Appendix Table 2). Four studies that measured pain using NRS did not  
39  
40 provide adequate data for meta-analysis; three of these reported significant reductions in pain  
41  
42 scores favouring pregabalin over placebo, while one reported no significant difference  
43  
44 between groups (See Appendix Table 3).  
45  
46  
47  
48  
49

50  
51 Three studies measured pain using the VAS, and all showed significant reduction in pain  
52  
53 scores favouring pregabalin over placebo (Appendix Table 3). Nine studies measured pain  
54  
55 using SF-MPQ VAS, and all reported significant reduction in pain scores favouring  
56  
57  
58  
59  
60

1  
2  
3 pregabalin over placebo. Four studies measured pain using SF-MPQ PPI index, and all  
4  
5 reported significant reduction in pain scores favouring pregabalin over placebo.  
6  
7  
8  
9  
10  
11  
12  
13  
14  
15  
16  
17  
18  
19  
20  
21  
22  
23  
24  
25  
26  
27  
28  
29  
30  
31  
32  
33  
34  
35  
36  
37  
38  
39  
40  
41  
42  
43  
44  
45  
46  
47  
48  
49  
50  
51  
52  
53  
54  
55  
56  
57  
58  
59  
60

**Table 1: Main characteristics of RCTs assessing the effects of pregabalin in the management of central and peripheral neuropathic pain**

| Study ID             | Design         | Sample size      | Duration | Setting                                                                                               | Population                                                                                  | Duration of neuropathic pain         | Outcome measures                                                                                                                                                                                                                                                                                                                                                                                                                                                                                                                                                    | Interventions                                            |                                                                                                                  |                                                                                                                                                                                                                                                                                                              |
|----------------------|----------------|------------------|----------|-------------------------------------------------------------------------------------------------------|---------------------------------------------------------------------------------------------|--------------------------------------|---------------------------------------------------------------------------------------------------------------------------------------------------------------------------------------------------------------------------------------------------------------------------------------------------------------------------------------------------------------------------------------------------------------------------------------------------------------------------------------------------------------------------------------------------------------------|----------------------------------------------------------|------------------------------------------------------------------------------------------------------------------|--------------------------------------------------------------------------------------------------------------------------------------------------------------------------------------------------------------------------------------------------------------------------------------------------------------|
|                      |                |                  |          |                                                                                                       |                                                                                             |                                      |                                                                                                                                                                                                                                                                                                                                                                                                                                                                                                                                                                     | Pregabalin                                               | Placebo                                                                                                          | Co-interventions                                                                                                                                                                                                                                                                                             |
| Arezzo 2008 [18]     | Parallel-group | PGB 82; PLA 85   | 13 weeks | 23 centres; USA                                                                                       | Men or women with T1DM or T2DM                                                              | ≥3 months                            | <b>Primary:</b> Mean pain scores (MPS); proportion of responders; Adverse events ≥3% <b>Secondary:</b> Sleep interference (11 point NRS), Present pain intensity (PPI) index; SF-MPQ VAS; CGIC; PGIC                                                                                                                                                                                                                                                                                                                                                                | 600 mg/d Fixed                                           | Not described                                                                                                    | Aspirin (up to 325 mg/d for cardiac and stroke prophylaxis), acetaminophen (up to 4 g/d), SSRIs, and benzodiazepines such as lorazepam (dosed at bedtime with stable [ $>30$ days] regimen for sleep problems) were allowed.                                                                                 |
| Cardenas 2013 [19]   | Parallel-group | PGB 112; PLA 108 | 16 weeks | 60 centres; Chile, China, Columbia, Czech Republic, Hong Kong, India, Japan, Phillipines, Russia, USA | Patients aged ≥18 years with C2-T12 complete/incomplete SCI                                 | ≥ 12 months                          | <b>Primary:</b> Duration-adjusted average change in pain (DAAC); <b>Secondary:</b> Change in mean pain score (from baseline to endpoint); Percentage of patients with $\geq 30\%$ reduction in mean pain score at end point; PGIC scores at endpoint; change in mean pain-related sleep interference score; change from baseline in mean pain at each study week; change from baseline in pain-related sleep interference scores at each week; Medical Outcomes Study-Sleep Scale (MOS-SS); Hospital Anxiety and Depression scale scores (at baseline and endpoint) | 150-600mg/d Flexible phase followed by maintenance phase | Matching grey capsule                                                                                            | Nonsteroidal anti-inflammatory drugs, cyclo-oxygenase-2 inhibitors, and acetaminophen ( $\leq 1.5$ g/d in Japan, $\leq 4$ g/d in all other countries) were permitted as rescue therapy. Antidepressants were permitted if the patient was on a stable dose within 30 days before the first visit.            |
| Dworkin 2003 [20]    | Parallel-group | PGB 89; PLA 84   | 8 weeks  | 29 centres; USA                                                                                       | Men or women ≥18 years old with post-herpetic neuralgia                                     | ≥3 months                            | <b>Primary:</b> Pain reduction in last 24 hours; Safety and adverse events <b>Secondary:</b> SF-MPQ at baseline, weeks 1,3,5,8; daily sleep interference score; MOS-SS; SF-36; PGIC; CGIC                                                                                                                                                                                                                                                                                                                                                                           | 300mg/d, 600mg/d Fixed                                   | Identical in appearance; administered 1 capsule three times daily                                                | Permitted medications included narcotic and non-narcotic analgesics, acetaminophen (not to exceed 4g/day), nonsteroidal anti-inflammatory drugs, aspirin, and antidepressants, including selective serotonin reuptake inhibitors (provided that dosing had been stable for at least 30 days before baseline) |
| Freynhagen 2005 [21] | Parallel-group | PGB 273; PLA 65  | 12 weeks | 60 centres; 9 European countries that were not specified                                              | Men or women ≥18 years old with primary diagnosis of painful DPN or post-herpetic neuralgia | ≥3 months PHN, ≥6 months DPN         | <b>Primary:</b> Mean Pain Score; adverse events; <b>Secondary:</b> daily sleep interference diary; MOS-SS; PGIC                                                                                                                                                                                                                                                                                                                                                                                                                                                     | 150-600mg/d Flexible; 300mg/d, 600mg/d Fixed             | Matching capsules; matching twice daily dosing schedule                                                          | SSRIs for treatment of depression, aspirin for myocardial infarction and stroke prophylaxis, short-acting benzodiazepines for insomnia, and paracetamol as rescue medication were allowable medications during the study period.                                                                             |
| Guan 2011 [22]       | Parallel-group | PGB 206; PLA 102 | 8 weeks  | 11 centres; China                                                                                     | Males or females 18-75 years with primary diagnosis of painful DPN or PHN                   | ≥3 months PHN, ≥1 year, <5 years DPN | <b>Primary:</b> Mean Pain score (DPRS) during preceding 24h; DAAC score; <b>Secondary:</b> Daily sleep interference scale; SF-MPQ; PGIC; CGIC; Safety and adverse events                                                                                                                                                                                                                                                                                                                                                                                            | 150-600mg/d Flexible                                     | Flexible dose placebo in matching capsules; doses titrated using same regimen                                    | NSAIDs and SSRIs allowed to be continued on stable dose                                                                                                                                                                                                                                                      |
| Holbech 2015 [23]    | Cross-over     | PGB 18; PLA 19   | 5 weeks  | 3 centres; Denmark                                                                                    | Males or females 20-85 years with polyneuropathy due to DPN                                 | ≥6 months                            | <b>Primary:</b> Total pain intensity on NRS; adverse events; <b>Secondary:</b> pain-related sleep disturbances; pain relief on 6-point verbal scale; <b>Other:</b> specific pain symptoms on the NRS; number of paracetamol tablets used as escape medication; SF-36 (health related QoL); Major Depression Inventory; QST tests                                                                                                                                                                                                                                    | 150mg/d, 300mg/d Fixed                                   | Matched placebos of identical appearance to the 2 trial drugs were dosed similarly using double-dummy technique. | Up to 6 tablets of 500 mg paracetamol could be used daily as escape medication                                                                                                                                                                                                                               |
| Huffman 2015 [24]    | Cross-over     | PGB 101; PLA 102 | 6 weeks  | 36 centres; USA (25), Sweden (4), South Africa (4), Czech Republic (3)                                | Men or women ≥18 years old with painful DPN and with pain on walking                        | Not described                        | <b>Primary:</b> Numeric Rating Scale (NRS); DPN Pain on Walking (NRS); <b>Secondary:</b> 30%, 50% responders; Brief Pain Inventory-Short Form (BPI-sf); Daytime Total Activity Counts per Day; Steps per Day; Walk 12 questionnaire; Norfolk Quality of Life-Diabetic Neuropathy (Norfolk QOL-DN) Total Quality of Life (TQOL) Score; Euro QoL-5 Dimensions (EQ-5D); Mean Sleep Interference Rating Score; HADS                                                                                                                                                     | 150-300 mg/day Fixed                                     | Matching placebo also administered in 3 divided doses                                                            | Not described                                                                                                                                                                                                                                                                                                |

1  
2  
3  
4  
5  
6  
7  
8  
9  
10  
11  
12  
13  
14  
15  
16  
17  
18  
19  
20  
21  
22  
23  
24  
25  
26  
27  
28  
29  
30  
31  
32  
33  
34  
35  
36  
37  
38  
39  
40  
41  
42  
43  
44  
45  
46  
47  
48  
49  
50  
51  
52  
53  
54  
55  
56  
57  
58  
59  
60

|                            |                |                  |          |                                 |                                                                                                                                                |                                                                     |                                                                                                                                                                                                                                                                                                                                                                                                  |                                                                 |                                                                                                   |                                                                                                                                                                                                                                                                                                                                                                                                                                                                                                                                 |
|----------------------------|----------------|------------------|----------|---------------------------------|------------------------------------------------------------------------------------------------------------------------------------------------|---------------------------------------------------------------------|--------------------------------------------------------------------------------------------------------------------------------------------------------------------------------------------------------------------------------------------------------------------------------------------------------------------------------------------------------------------------------------------------|-----------------------------------------------------------------|---------------------------------------------------------------------------------------------------|---------------------------------------------------------------------------------------------------------------------------------------------------------------------------------------------------------------------------------------------------------------------------------------------------------------------------------------------------------------------------------------------------------------------------------------------------------------------------------------------------------------------------------|
| Kanodia 2011 [25]          | Parallel-group | PGB 23; PLA 22   | 4 weeks  | 1 centre; India                 | Patients with acute herpes zoster presenting within 72 hours of onset                                                                          | < 3 days                                                            | <b>Primary:</b> Pain on linear VAS; Adverse events                                                                                                                                                                                                                                                                                                                                               | 150mg/d Fixed                                                   | Not described                                                                                     | Oral acyclovir 800mg was given 5 times per day for 7 days                                                                                                                                                                                                                                                                                                                                                                                                                                                                       |
| Kim 2011 [26]              | Parallel-group | PGB 110; PLA 109 | 12 weeks | 32 centres; Asia-Pacific        | Males or females $\geq 18$ years with diagnosis of central post-stroke pain                                                                    | $\geq 3$ months                                                     | <b>Primary:</b> Mean pain score; <b>Secondary:</b> Daily sleep interference scale (DSIS); Weekly mean pain scores; proportion of 30%, 50% responders; quantitative assessment of Neuropathic pain (QANeP); Neuropathic Pain Symptom Inventory (NPSI); Weekly mean sleep interference scores; MOS-SS; HADS; SF-MPQ VAS- Part B; Euro Quality of Life (EQ-5D); PGIC; CGIC; Safety and tolerability | 300,600mg/d Dose adjustment followed by fixed maintenance phase | Matching placebo                                                                                  | Stable medications for pain or insomnia if used normally >30 days before screening                                                                                                                                                                                                                                                                                                                                                                                                                                              |
| Krecevski Skvarc 2010 [27] | Parallel-group | PGB 14; PLA 15   | 3 weeks  | 1 centre; Slovenia              | Men or women 30-80 years with herpes zoster pain.                                                                                              |                                                                     | <b>Primary:</b> Assessment of pain severity (11 point Likert scale); <b>Secondary:</b> patients' ratings of the severity of allodynia, hyperalgesia, and burning, prickling and tingling sensations; rating of quality of sleep and physical activity; consumption of analgesics; occurrence of adverse events; SHN; PHN                                                                         | 150 or 300mg/d Fixed                                            | Placebo also administered twice daily                                                             | Oxycodone, naproxen and/or tramadol, morphine, diclofenac                                                                                                                                                                                                                                                                                                                                                                                                                                                                       |
| Esser 2004 [28]            | Parallel-group | PGB 240; PLA 97  | 5 weeks  | 45 centres; USA                 | Men or women $\geq 18$ years old who were diagnosed with diabetes mellitus (type 1 or 2) and had distal symmetric sensorimotor polyneuropathy. | 1-5 years                                                           | <b>Primary:</b> Pain (11-point NRS); <b>Secondary:</b> daily sleep interference diary; SF-MPQ; CGIC; PGIC; SF-36; POMS; <b>Safety outcomes</b>                                                                                                                                                                                                                                                   | 75, 300, 600mg/d Fixed                                          | Placebo administered three times daily                                                            | Acetaminophen and SSRIs permitted                                                                                                                                                                                                                                                                                                                                                                                                                                                                                               |
| Liu 2015 [29]              | Parallel-group | PGB 112; PLA 110 | 8 weeks  | 22 centres; China               | Male and female ethnically Chinese patients aged $\geq 18$ , diagnosed with post-herpetic neuralgia                                            | Symptoms persisting $\geq 3$ months after the healing of HZ lesions | <b>Primary:</b> Mean score of Daily Pain Rating Score; <b>Secondary:</b> Change from baseline on Pain VAS; Change from baseline on Present Pain Intensity (PPI) of the SF-MPQ; 30% pain responders at endpoint; change from baseline in weekly mean pain score; change from baseline in sleep interference score (11-point NRS); CGIC; PGIC; MOS-SS; Adverse events                              | 150mg/d, 300mg/d Fixed                                          | Matched placebo capsules on the same dosing schedule                                              | Concomitant use of medications permitted except antidepressants, epileptics, analgesics or corticosteroids, skeletal muscle relaxants, mexiletine, and dextromethorphan as well as electrotherapy, transcutaneous electrical nerve stimulation, acupuncture, and neurosurgical therapy.                                                                                                                                                                                                                                         |
| Mathieson 2017 [30]        | Parallel-group | PGB 108; PLA 101 | 8 weeks  | Number not specified; Australia | Patients with sciatica                                                                                                                         | $\geq 1$ week, <1 year                                              | <b>Primary:</b> Average leg-pain intensity score over the course of previous 24 hours as assessed at 8 weeks and 52 weeks; <b>Secondary:</b> extent of disability (Roland Disability Questionnaire for sciatica); back pain intensity; global perceived effect; Quality of Life as measured on Short Form Health Survey 12; adverse events                                                       | 150-600mg/d Flexible                                            | Matching placebo capsules were packaged in white, opaque, sealed containers at a central pharmacy | Concomitant therapies included physical therapies as well as other analgesic medications (except for adjuvant analgesic agents), which would ideally be prescribed in accordance with the World Health Organization pain ladder. Trial clinicians were asked not to prescribe certain medicines (antiepileptic medications, selective serotonin reuptake inhibitors, serotonin-norepinephrine reuptake inhibitors, tricyclic antidepressants, topical lidocaine, and benzodiazepines) or to schedule interventional procedures. |

|                                                                                                                                                                                                                                                                                                                                                             |                      |                |                  |                                   |                                                                                      |                                                                                                                                                                                     |                                                                                                   |                                                                                                                                                                                                                                                                                                                                                                                                                                                                                                                                                                                                                                                                                                                                                                                                                    |                        |                                                                                 |                                                                                                                                                                                                                                                                              |
|-------------------------------------------------------------------------------------------------------------------------------------------------------------------------------------------------------------------------------------------------------------------------------------------------------------------------------------------------------------|----------------------|----------------|------------------|-----------------------------------|--------------------------------------------------------------------------------------|-------------------------------------------------------------------------------------------------------------------------------------------------------------------------------------|---------------------------------------------------------------------------------------------------|--------------------------------------------------------------------------------------------------------------------------------------------------------------------------------------------------------------------------------------------------------------------------------------------------------------------------------------------------------------------------------------------------------------------------------------------------------------------------------------------------------------------------------------------------------------------------------------------------------------------------------------------------------------------------------------------------------------------------------------------------------------------------------------------------------------------|------------------------|---------------------------------------------------------------------------------|------------------------------------------------------------------------------------------------------------------------------------------------------------------------------------------------------------------------------------------------------------------------------|
| 1<br>2<br>3<br>4<br>5<br>6<br>7<br>8<br>9<br>10<br>11<br>12<br>13<br>14<br>15<br>16<br>17<br>18<br>19<br>20<br>21<br>22<br>23<br>24<br>25<br>26<br>27<br>28<br>29<br>30<br>31<br>32<br>33<br>34<br>35<br>36<br>37<br>38<br>39<br>40<br>41<br>42<br>43<br>44<br>45<br>46<br>47<br>48<br>49<br>50<br>51<br>52<br>53<br>54<br>55<br>56<br>57<br>58<br>59<br>60 | Moon 2010 [31]       | Parallel-group | PGB 162; PLA 78  | 10 weeks                          | Multicentre (number not specified); Korea                                            | Korean patients aged 18 years with neuropathic pain (diabetic peripheral neuropathy, postherpetic neuralgia, or posttraumatic neuropathic pain)                                     | Mean duration of pain pregabalin patients- 3 years, placebo patients 3.2 years                    | <b>Primary:</b> Endpoint mean DPRS score, Secondary: weekly mean DPRS score, duration adjusted average change (DAAC) of adjusted mean DPRS from baseline to endpoint, proportion of responders (whose scores reduced by 30% or 50%), Daily Sleep Interference Scale (DSIS), Euro Quality of Life assessment (EQ-5D); utility and VAS score; MOS-SS; HADS; PGIC; CGIC; <b>Tolerability evaluation</b> of adverse events and vital signs                                                                                                                                                                                                                                                                                                                                                                             | 150-600mg/d Flexible   | Matching placebo capsules provided by Pfizer                                    | Most patients were taking drug therapy at baseline, and the majority (83.8%) remained on concomitant drug therapy during the study, including one-third who received tricyclic antidepressants.                                                                              |
|                                                                                                                                                                                                                                                                                                                                                             | Rauck 2013 [32]      | Parallel-group | PGB 56; PLA 112  | 20 weeks                          | 85 centres; USA                                                                      | Men or women ≥18 years old who were diagnosed with diabetes mellitus (type 1 or 2) and had pain attributed to DPN, defined as painful distal symmetric sensorimotor polyneuropathy. | ≥6 months, <5 years                                                                               | <b>Primary:</b> Change from baseline in pain intensity score (11 point PI-NRS); <b>Secondary:</b> Change from baseline in mean 24-hour average pain intensity score, daytime average pain intensity score, nighttime average pain intensity score, current pain intensity score, daytime worst pain intensity score, nighttime worst pain intensity score, sleep interference score, and rescue analgesia consumption (mg); Neuropathic Pain Scale (NPS); SF-MPQ; pre- and post-50-foot (15 meter) walk pain scores; PGIC; CGIC; proportion of subjects achieving various levels of reduction in the 24-hour average pain intensity score; time to onset of sustained improvement in the 24-hour average pain intensity score; POMS; SF-36 health-related quality of life questionnaire; <b>Safety assessments</b> | 300mg/d Fixed          | Matching placebo in blister card                                                | Acetaminophen, up to 3 g/day, was allowed as rescue medication for pain throughout the trial but was not allowed within 24 hours of any site visit for assessments.                                                                                                          |
|                                                                                                                                                                                                                                                                                                                                                             | Richter 2005 [33]    | Parallel-group | PGB 161; PLA 85  | 6 weeks                           | Multicentre; not specified                                                           | Patients with diabetes and painful distal symmetrical sensorimotor polyneuropathy                                                                                                   | 1-5 years                                                                                         | <b>Primary:</b> Pain; Adverse events; <b>Secondary:</b> Pain characteristics (SF-MPQ, PPI); sleep interference (11 point NRS 0 to 10); health status (SF-36); psychologic state (POMS); global improvement (PGIC, CGIC)                                                                                                                                                                                                                                                                                                                                                                                                                                                                                                                                                                                            | 150mg/d, 600mg/d Fixed | Matching dose and schedule                                                      | Aspirin (for prophylaxis of myocardial infarction and transient ischemic attacks), acetaminophen (3 g/day), and stable doses of serotonin reuptake inhibitors were allowed.                                                                                                  |
|                                                                                                                                                                                                                                                                                                                                                             | Rosenstock 2004 [34] | Parallel-group | PGB 76; PLA 70   | 8 weeks                           | 25 centres                                                                           | Men or women ≥18 years old with type 1 or 2 diabetes mellitus who reported symmetrical painful symptoms in distal extremities for a period of 1-5 years prior to study              | 1-5 years                                                                                         | <b>Primary:</b> Endpoint mean score <b>Secondary:</b> SF-MPQ-Sensory, affective and total score; daily sleep interference score; PGIC; CGIC; SF-36; Profile of Mood States (POMS); <b>Safety</b>                                                                                                                                                                                                                                                                                                                                                                                                                                                                                                                                                                                                                   | 300mg/d Fixed          | Lactose USP, 1 capsule three times daily                                        | Acetaminophen (up to 4 g/day), aspirin (up to 325 mg/day for myocardial infarction or transient ischemic attack prophylaxis), and serotonin reuptake inhibitors provided no dose changes occurred within 30 days prior to randomization or during the study)                 |
|                                                                                                                                                                                                                                                                                                                                                             | Sabatowski 2004 [35] | Parallel-group | PGB 157; PLA 81  | 8 weeks                           | 53 centres; Europe, Australia                                                        | Men or women ≥18 years old with post-herpetic neuralgia                                                                                                                             | ≥6 months                                                                                         | <b>Primary:</b> Endpoint mean score; <b>Secondary:</b> mean sleep interference scores, PGIC, CGIC, SF-36 health survey, Zung Self-Rating Depression Scale, VAS of the SF-MPQ, <b>Adverse events</b>                                                                                                                                                                                                                                                                                                                                                                                                                                                                                                                                                                                                                | 150mg/d, 300mg/d Fixed | Identical in appearance                                                         | Patients allowed to continue acetaminophen (up to 3 g/day), non-steroidal anti-inflammatory drugs, opioid or non-opioid analgesics, or antidepressants.                                                                                                                      |
|                                                                                                                                                                                                                                                                                                                                                             | Natoh 2011 [36]      | Parallel-group | PGB 179; PLA 90  | 13 weeks<br>**intervention period | 62 centres; Japan                                                                    | Men or women ≥18 years old with diabetic peripheral neuropathy                                                                                                                      | ≥ 1 year                                                                                          | <b>Primary:</b> Change from baseline in mean weekly pain score at week 13 using a 11 point NRS; <b>Secondary:</b> weekly mean pain scores, responder rates, SF-MPQ score, weekly mean sleep interference scores using 11-point NRS; MOS-Sleep Scale, SF-36, PGIC, CGIC, <b>Safety:</b> Adverse events.                                                                                                                                                                                                                                                                                                                                                                                                                                                                                                             | 300mg/d, 600mg/d Fixed | Not described, same schedule                                                    | Not described                                                                                                                                                                                                                                                                |
|                                                                                                                                                                                                                                                                                                                                                             | Shabbir 2011 [37]    | Parallel-group | PGB 70; PLA 70   | 6 weeks                           | 2 centres; Mayo Hospital and Services Hospital, Lahore.                              | Men or women ≥18 years old with diabetic peripheral neuropathy                                                                                                                      | ≥6 months                                                                                         | <b>Primary:</b> Reduction in pain (measured with NRS); responders who experienced 50% or more reduction in baseline pain score on NRS                                                                                                                                                                                                                                                                                                                                                                                                                                                                                                                                                                                                                                                                              | 150-600mg/d Flexible   | Not described                                                                   | Not described                                                                                                                                                                                                                                                                |
|                                                                                                                                                                                                                                                                                                                                                             | Siddall 2006 [38]    | Parallel-group | PGB 70; PLA 67   | 12 weeks                          | 8 centres; Australia                                                                 | Patients with central neuropathic pain in spinal cord injury                                                                                                                        | Persisted continuously for at least 3 months or with relapses and remission for at least 6 months | <b>Primary:</b> Endpoint mean pain scores, Sleep-interference scores, SF-MPQ Total, sensory and affective scores, from which VAS and PPI score was derived. MOS-sleep scale and HADS, PGIC; <b>Tolerability and safety</b>                                                                                                                                                                                                                                                                                                                                                                                                                                                                                                                                                                                         | 150-600mg/d Flexible   | Placebo also administered twice daily                                           | 70% of patients taking other medications too: opiates, tricyclics, AEDs, NSAIDs/Cox2, Benzos, SSR/SSNI, Muscle relaxants.                                                                                                                                                    |
|                                                                                                                                                                                                                                                                                                                                                             | Simpson 2010 [39]    | Parallel-group | PGB 151; PLA 151 | 14 weeks                          | 44 centres; USA, Puerto Rico                                                         | Men or women ≥18 years old with painful HIV-DSP                                                                                                                                     | ≥ 3 months                                                                                        | <b>Primary:</b> Change from baseline in mean NPRS score; <b>Secondary:</b> change in sleep interference scores; MOS-Sleep Scale; PGIC; Pain- modified Brief Pain Inventory; Gracely Pain Scale (GPS); <b>Safety:</b> adverse events                                                                                                                                                                                                                                                                                                                                                                                                                                                                                                                                                                                | 150-600mg/d Flexible   | Placebo also administered twice daily                                           | Neurotoxic antiretroviral (ARV) drugs known to cause sensory neuropathy clinically similar to HIV-DSP must have been on stable doses for ≥3 months before screening Doses of other pain medications had to be stable for ≥1 month before treatment and throughout the study. |
|                                                                                                                                                                                                                                                                                                                                                             | Simpson 2014 [40]    | Parallel-group | PGB 183; PLA 194 | 16 weeks                          | 45 centres; South Africa, USA, India, Columbia, Thailand, Peru, Puerto Rico, Poland. | Men and women ≥18 years of age with HIV neuropathy                                                                                                                                  | ≥ 3 months                                                                                        | <b>Primary:</b> Change in Pain scores (NRS); <b>Secondary:</b> PGIC/CGIC; Brief Pain Symptom Inventory short form (BPI-sf); MOS-SS; Pain-related sleep interference and overall sleep disturbance (NRS-Sleep scale); Safety                                                                                                                                                                                                                                                                                                                                                                                                                                                                                                                                                                                        | 150-600mg/d Flexible   | Matching placebo delivered through system for randomization and drug dispensing | NSAIDs, if taken at stable dose for ≥4 weeks before study, antidepressants without efficacy for neuropathic pain if taken at stable dose for ≥30 days before study [SSRIs, bupropion, trazodone], nonbenzodiazepine hypnotics no more than                                   |



1  
2  
3  
4  
5  
6  
7  
8  
9  
10  
11  
12  
13  
14  
15  
16  
17  
18  
19  
20  
21  
22  
23  
24  
25  
26  
27  
28  
29  
30  
31  
32  
33  
34  
35  
36  
37  
38  
39  
40  
41  
42  
43  
44  
45  
46  
47  
48  
49  
50  
51  
52  
53  
54  
55  
56  
57  
58  
59  
60

|                        |                |                  |          |                                                                                                                           |                                                                                                       |                 |                                                                                                                                                                                                                                                             |                                               |                                                                                          |                                                                                                                                                                                                                                                        |
|------------------------|----------------|------------------|----------|---------------------------------------------------------------------------------------------------------------------------|-------------------------------------------------------------------------------------------------------|-----------------|-------------------------------------------------------------------------------------------------------------------------------------------------------------------------------------------------------------------------------------------------------------|-----------------------------------------------|------------------------------------------------------------------------------------------|--------------------------------------------------------------------------------------------------------------------------------------------------------------------------------------------------------------------------------------------------------|
|                        |                |                  |          |                                                                                                                           |                                                                                                       |                 |                                                                                                                                                                                                                                                             |                                               |                                                                                          | once/week for sleep disturbance if clinically essential, rescue therapy of oral acetaminophen (max 3g/day), low dose ( $\leq 650$ mg/day) aspirin and stable antiretroviral treatment >8 weeks before study                                            |
| Stacey 2008 [41]       | Parallel-group | PGB 179; PLA 90  | 4 weeks  | 42 centres; United States, Germany, Italy, Spain, and United Kingdom                                                      | Men or women $\geq 18$ years old with post-herpetic neuralgia                                         | $\geq 3$ months | <b>Primary:</b> Pain reduction; time to onset of meaningful pain relief; <b>Secondary:</b> Daily sleep interference score; PGIC; VAS of the SF-MPQ; VAS anxiety; VAS allodynia; <b>Safety evaluation</b>                                                    | 150-600mg/d Flexible dose; 300mg/d Fixed dose | Placebo also administered twice daily                                                    | Concomitant pain treatments permitted given that it must be stable for at least 30 days                                                                                                                                                                |
| Qolle 2008 [42]        | Parallel-group | PGB 299; PLA 96  | 12 weeks | 58 centres; Germany, Hungary, Poland, United Kingdom, Australia, and South Africa                                         | Men or women $\geq 18$ years old with painful symmetrical sensorimotor polyneuropathy due to diabetes | $\geq 1$ year   | <b>Primary:</b> Pain reduction (according to 11-point NRS) from baseline; treatment responders; <b>Secondary:</b> PGIC; CGIC; EuroQoL Health Utilities Index; Daily pain-related sleep-interference scores; EQ-5D (VAS); <b>Safety evaluation</b>           | 150, 300, 300/600mg/d Fixed                   | Placebo also administered twice daily                                                    | SSRIs for depression or anxiety given in a stable dose for >30 days                                                                                                                                                                                    |
| Van Seventer 2006 [43] | Parallel-group | PGB 275; PLA 93  | 13 weeks | 76 centres                                                                                                                | Men or women $\geq 18$ years old with post-herpetic neuralgia                                         | >3 months       | <b>Primary:</b> Endpoint mean pain scores; patients with $\geq 50\%$ and $\geq 30\%$ reduction in pain score from baseline; weekly mean pain scores; <b>Secondary:</b> endpoint mean sleep-interference scores, weekly mean sleep-interference scores, PGIC | 150, 300, 600mg/d Fixed                       | Placebo also administered twice daily                                                    | non-narcotic analgesics, e.g., noramidopyrine and paracetamol, and stable regimens of opioids, anti-inflammatories, and antidepressants                                                                                                                |
| Van Seventer 2010 [44] | Parallel-group | PGB 127; PLA 127 | 8 weeks  | 44 centres; Belgium, Canada, Denmark, Finland, Italy, Netherlands, Portugal, Romania, Sweden, Switzerland, United Kingdom | Men or women aged 18–80 with post-traumatic peripheral neuropathic pain                               | $\geq 3$ months | <b>Primary:</b> End-point mean pain score; <b>Secondary:</b> rating of extent to which pain interfered with sleep; MOS-SS; HADS; mBPI-sf; PGIC; <b>Tolerability and safety assessment</b>                                                                   | 150-600mg/d Flexible                          | Placebo also administered twice daily                                                    | NSAIDs, COX-2 inhibitors, opioid and non-opioid analgesics, anti-epileptic drugs, antidepressant medications, other concomitant medications if they had been stable for at least 1 month before the study and would remain stable throughout the study |
| Franken 2008 [45]      | Parallel-group | PGB 20; PLA 20   | 4 weeks  | 1 centre; Netherlands                                                                                                     | Men and women $\geq 18$ years old with central neuropathic pain                                       | $\geq 6$ months | <b>Primary:</b> Pain intensity score (VAS); Mean endpoint pain score; Pain Disability Index (PDI); EQ-5D; Medical Outcomes Short-form Health Survey questionnaire 36 (SF36); <b>Safety</b>                                                                  | 150-600mg/d Flexible                          | Flexible dose placebo (1-4 capsules per day); matching capsules; on same dosing schedule | Adjuvant analgesics                                                                                                                                                                                                                                    |

ABBREVIATIONS: CGIC: Clinician global impression of change; DPN: Diabetic peripheral neuropathy; PGB: Pregabalin; PGIC: Patient global impression of change; PLA: Placebo; SF-MPQ PPI: Short-Form McGill Pain Questionnaire *personal pain intensity*; SF-MPQ VAS: Short-Form McGill Pain Questionnaire visual assessment scale; VAS: Visual assessment scale

| Summary of Findings Table 1: Effect of pregabalin on NRS scores in patients with neuropathic pain                                                                                                                                                                                                                                                                                                                                                                                                                                                           |                                          |                                                                                                                                                                           |                          |                              |                                          |                            |
|-------------------------------------------------------------------------------------------------------------------------------------------------------------------------------------------------------------------------------------------------------------------------------------------------------------------------------------------------------------------------------------------------------------------------------------------------------------------------------------------------------------------------------------------------------------|------------------------------------------|---------------------------------------------------------------------------------------------------------------------------------------------------------------------------|--------------------------|------------------------------|------------------------------------------|----------------------------|
| Patient or population: patients with neuropathic pain                                                                                                                                                                                                                                                                                                                                                                                                                                                                                                       |                                          |                                                                                                                                                                           |                          |                              |                                          |                            |
| Settings:                                                                                                                                                                                                                                                                                                                                                                                                                                                                                                                                                   |                                          |                                                                                                                                                                           |                          |                              |                                          |                            |
| Intervention: Effect of pregabalin on pain                                                                                                                                                                                                                                                                                                                                                                                                                                                                                                                  |                                          |                                                                                                                                                                           |                          |                              |                                          |                            |
| Outcomes                                                                                                                                                                                                                                                                                                                                                                                                                                                                                                                                                    | Illustrative comparative risks* (95% CI) |                                                                                                                                                                           | Relative effect (95% CI) | No of Participants (studies) | Quality of the evidence (GRADE)          | Comments                   |
|                                                                                                                                                                                                                                                                                                                                                                                                                                                                                                                                                             | Assumed risk                             | Corresponding risk                                                                                                                                                        |                          |                              |                                          |                            |
|                                                                                                                                                                                                                                                                                                                                                                                                                                                                                                                                                             | Control                                  | Effect of pregabalin in pain                                                                                                                                              |                          |                              |                                          |                            |
| Mean Pain Score                                                                                                                                                                                                                                                                                                                                                                                                                                                                                                                                             |                                          | The mean mean pain score in the intervention groups was <b>0.49 standard deviations lower</b> (0.66 to 0.32 lower)                                                        |                          | 5093 (21 studies)            | ⊕⊖⊖⊖<br><b>very low</b> <sup>1,2</sup>   | SMD -0.49 (-0.66 to -0.32) |
| Mean Pain Score - Central neuropathic pain (including sciatica (radicular pain))                                                                                                                                                                                                                                                                                                                                                                                                                                                                            |                                          | The mean mean pain score - central neuropathic pain (including sciatica) in the intervention groups was <b>0.38 standard deviations lower</b> (0.8 lower to 0.04 higher)  |                          | 785 (4 studies)              | ⊕⊖⊖⊖<br><b>very low</b> <sup>2,3,4</sup> | SMD -0.38 (-0.8 to 0.04)   |
| Mean Pain Score - Peripheral neuropathic pain (includes PDN, HZ & PHN)                                                                                                                                                                                                                                                                                                                                                                                                                                                                                      |                                          | The mean mean pain score - peripheral neuropathic pain (includes pdn, hz & phn) in the intervention groups was <b>0.52 standard deviations lower</b> (0.71 to 0.33 lower) |                          | 4308 (17 studies)            | ⊕⊖⊖⊖<br><b>very low</b> <sup>1,2</sup>   | SMD -0.52 (-0.71 to -0.33) |
| *The <b>corresponding risk</b> (and its 95% confidence interval) is based on the assumed risk in the comparison group and the <b>relative effect</b> of the intervention (and its 95% CI).<br>CI: Confidence interval; NRS: Numerical rating scale; SMD: Standard mean deviation; PDN: Painful diabetic neuropathy; HZ: Herpes zoster; PHN: Post-herpetic neuralgia                                                                                                                                                                                         |                                          |                                                                                                                                                                           |                          |                              |                                          |                            |
| GRADE Working Group grades of evidence<br><b>High quality:</b> Further research is very unlikely to change our confidence in the estimate of effect.<br><b>Moderate quality:</b> Further research is likely to have an important impact on our confidence in the estimate of effect and may change the estimate.<br><b>Low quality:</b> Further research is very likely to have an important impact on our confidence in the estimate of effect and is likely to change the estimate.<br><b>Very low quality:</b> We are very uncertain about the estimate. |                                          |                                                                                                                                                                           |                          |                              |                                          |                            |
| <sup>1</sup> Inconsistency in allocation concealment and blinding, selective reporting, authors had financial ties to industry sponsor<br><sup>2</sup> Substantial heterogeneity<br><sup>3</sup> Industry-sponsored, selective reporting<br><sup>4</sup> Wide confidence interval                                                                                                                                                                                                                                                                           |                                          |                                                                                                                                                                           |                          |                              |                                          |                            |

### Adverse events

Figure 5 shows that pregabalin was significantly more likely to cause adverse events compared with placebo, RR 1.33 (95% CI 1.23 to 1.44,  $P < 0.00001$ ,  $I^2 = 52\%$ ). This translates into an absolute effect of 145 (95% CI 101 to 194) more adverse events per 1000 treated. The overall quality of the evidence was low (SoF Table 2). Sensitivity analyses revealed similar direction of effects (Appendix Table 2). The risk of experiencing individual adverse events of weight gain, somnolence, dizziness, peripheral oedema, fatigue, visual disturbances, ataxia, non-peripheral oedema, dry mouth, vertigo and euphoria were significantly increased with pregabalin compared with placebo (see Appendix Table 1 and Figures S2 to S12). Pregabalin was also significantly more likely to cause discontinuation because of adverse events (RR 1.91, 95% CI 1.54 to 2.37,  $P < 0.00001$ ,  $I^2 = 0\%$ ); the quality of the evidence was low (SoF Table 2; Appendix Table 1; and Figure S13). Sensitivity analyses by study duration revealed similar direction of effects, but there was no significant difference with higher quality studies (Appendix Table 2).

There was no significant difference in the risk of serious adverse events (RR 0.9; 95% CI 0.66 to 1.24,  $P = 0.50$ ,  $I^2 = 0\%$ ; SoF Table 2; Appendix Table 1; and Figure S14); the quality of the evidence was moderate. Sensitivity analyses showed a significant effect in favour on pregabalin with three higher quality studies, but there was no difference based on study duration (Appendix Table 2). In total, six deaths were reported across four trials, five in pregabalin group and one in placebo: RR 0.86, 95% CI 0.18 to 4.06,  $P = 0.85$ ,  $I^2 = 0\%$ .

| <b>Summary of Findings Table 2: Effect of pregabalin on adverse events in patients with neuropathic pain</b>                                                                                                                                                                                                   |                                          |                                                           |                          |                              |                                 |                             |
|----------------------------------------------------------------------------------------------------------------------------------------------------------------------------------------------------------------------------------------------------------------------------------------------------------------|------------------------------------------|-----------------------------------------------------------|--------------------------|------------------------------|---------------------------------|-----------------------------|
| <b>Patient or population:</b> patients with Neuropathic pain                                                                                                                                                                                                                                                   |                                          |                                                           |                          |                              |                                 |                             |
| <b>Settings:</b>                                                                                                                                                                                                                                                                                               |                                          |                                                           |                          |                              |                                 |                             |
| <b>Intervention:</b> Effect of pregabalin on adverse events                                                                                                                                                                                                                                                    |                                          |                                                           |                          |                              |                                 |                             |
| Outcomes                                                                                                                                                                                                                                                                                                       | Illustrative comparative risks* (95% CI) |                                                           | Relative effect (95% CI) | No of Participants (studies) | Quality of the evidence (GRADE) | Number needed to harm (NNH) |
|                                                                                                                                                                                                                                                                                                                | Assumed risk Control                     | Corresponding risk Effect of pregabalin on adverse events |                          |                              |                                 |                             |
| Adverse events                                                                                                                                                                                                                                                                                                 | Study population                         |                                                           | RR 1.33 (1.23 to 1.44)   | 4010 (19 studies)            | ⊕⊕⊖⊖<br>low <sup>1,2</sup>      | 6 (5 to 9)                  |
|                                                                                                                                                                                                                                                                                                                | 523 per 1000                             | 696 per 1000 (643 to 753)                                 |                          |                              |                                 |                             |
|                                                                                                                                                                                                                                                                                                                | Moderate                                 |                                                           |                          |                              |                                 |                             |
|                                                                                                                                                                                                                                                                                                                | 440 per 1000                             | 585 per 1000 (541 to 634)                                 |                          |                              |                                 |                             |
| Discontinuations because of adverse events                                                                                                                                                                                                                                                                     | Study population                         |                                                           | RR 1.91 (1.54 to 2.37)   | 5426 (24 studies)            | ⊕⊕⊖⊖<br>low <sup>1,3</sup>      | 22 (15 to 37)               |
|                                                                                                                                                                                                                                                                                                                | 51 per 1000                              | 98 per 1000 (79 to 121)                                   |                          |                              |                                 |                             |
|                                                                                                                                                                                                                                                                                                                | Moderate                                 |                                                           |                          |                              |                                 |                             |
|                                                                                                                                                                                                                                                                                                                | 47 per 1000                              | 90 per 1000 (72 to 111)                                   |                          |                              |                                 |                             |
| Serious adverse events                                                                                                                                                                                                                                                                                         | Study population                         |                                                           | RR 0.9 (0.66 to 1.24)    | 4272 (16 studies)            | ⊕⊕⊕⊖<br>moderate <sup>1</sup>   | 289 (-121 to 85)            |
|                                                                                                                                                                                                                                                                                                                | 35 per 1000                              | 31 per 1000 (23 to 43)                                    |                          |                              |                                 |                             |
|                                                                                                                                                                                                                                                                                                                | Moderate                                 |                                                           |                          |                              |                                 |                             |
|                                                                                                                                                                                                                                                                                                                | 20 per 1000                              | 18 per 1000 (13 to 25)                                    |                          |                              |                                 |                             |
| *The basis for the <b>assumed risk</b> (e.g. the median control group risk across studies) is provided in footnotes. The <b>corresponding risk</b> (and its 95% confidence interval) is based on the assumed risk in the comparison group and the <b>relative effect</b> of the intervention (and its 95% CI). |                                          |                                                           |                          |                              |                                 |                             |
| CI: Confidence interval;                                                                                                                                                                                                                                                                                       |                                          |                                                           |                          |                              |                                 |                             |
| GRADE Working Group grades of evidence                                                                                                                                                                                                                                                                         |                                          |                                                           |                          |                              |                                 |                             |
| <b>High quality:</b> Further research is very unlikely to change our confidence in the estimate of effect.                                                                                                                                                                                                     |                                          |                                                           |                          |                              |                                 |                             |
| <b>Moderate quality:</b> Further research is likely to have an important impact on our confidence in the estimate of effect and may change the estimate.                                                                                                                                                       |                                          |                                                           |                          |                              |                                 |                             |
| <b>Low quality:</b> Further research is very likely to have an important impact on our confidence in the estimate of effect and is likely to change the estimate.                                                                                                                                              |                                          |                                                           |                          |                              |                                 |                             |
| <b>Very low quality:</b> We are very uncertain about the estimate.                                                                                                                                                                                                                                             |                                          |                                                           |                          |                              |                                 |                             |
| <sup>1</sup> Selective reporting, authors had financial ties to industry sponsor                                                                                                                                                                                                                               |                                          |                                                           |                          |                              |                                 |                             |
| <sup>2</sup> Moderate heterogeneity                                                                                                                                                                                                                                                                            |                                          |                                                           |                          |                              |                                 |                             |
| <sup>3</sup> Wide confidence interval                                                                                                                                                                                                                                                                          |                                          |                                                           |                          |                              |                                 |                             |

### **Sleep disturbance**

Twenty-one studies measured sleep interference using the NRS sleep interference scale or variants of it. Pregabalin significantly reduced sleep interference scores compared with placebo: SMD -0.38, 95% CI -0.50 to -0.26,  $P < 0.00001$ ,  $I^2 = 32\%$ ; the quality of the evidence was moderate (SoF Table 3; Appendix Table 1; and Figure S15). Fourteen studies reported sleep interference outcome measures with the NRS scale but did not provide adequate data for statistical pooling; 12 of these reported significant reductions in sleep interference scores favouring pregabalin over placebo, while two studies reported no significant difference between groups (Appendix Table 3). Seven studies measured sleep outcomes using the Medical Outcomes Study Sleep Scale (MOS-Sleep). We could not pool results from these studies because of insufficient data. All the studies reported significant improvements in sleep scores in favour of pregabalin over placebo (Appendix Table 3).

### **Quality of life (QOL)**

Four studies assessed QOL using EQ-5D scores or variants of it. Two of these reported significant improvements with pregabalin compared with placebo, while the other two reported no significant differences between groups (Appendix Table 3).

### **Patient Global Impression of Change (PGIC)**

Thirteen studies reported this outcome. Ten studies reported significant improvements in PGIC scores with pregabalin compared with placebo, while three studies found no significant differences between groups (Appendix Table 3). We could not pool results from these studies because insufficient data were published.

| Summary of Findings Table 3: Effect of pregabalin on sleep scores in patients with neuropathic pain                                                                                                                                                                                                                                                                                                                                                                                                                                                         |                                          |                                                                                                                      |                          |                              |                                 |                           |
|-------------------------------------------------------------------------------------------------------------------------------------------------------------------------------------------------------------------------------------------------------------------------------------------------------------------------------------------------------------------------------------------------------------------------------------------------------------------------------------------------------------------------------------------------------------|------------------------------------------|----------------------------------------------------------------------------------------------------------------------|--------------------------|------------------------------|---------------------------------|---------------------------|
| <b>Patient or population:</b> patients with Neuropathic pain<br><b>Settings:</b><br><b>Intervention:</b> Effect of pregabalin on sleep                                                                                                                                                                                                                                                                                                                                                                                                                      |                                          |                                                                                                                      |                          |                              |                                 |                           |
| Outcomes                                                                                                                                                                                                                                                                                                                                                                                                                                                                                                                                                    | Illustrative comparative risks* (95% CI) |                                                                                                                      | Relative effect (95% CI) | No of Participants (studies) | Quality of the evidence (GRADE) | Comments                  |
|                                                                                                                                                                                                                                                                                                                                                                                                                                                                                                                                                             | Assumed risk Control                     | Corresponding risk Effect of pregabalin on sleep                                                                     |                          |                              |                                 |                           |
| Sleep interference                                                                                                                                                                                                                                                                                                                                                                                                                                                                                                                                          |                                          | The mean sleep interference in the intervention groups was <b>0.38 standard deviations lower</b> (0.5 to 0.26 lower) |                          | 1641 (7 studies)             | ⊕⊕⊕⊖<br>moderate <sup>1</sup>   | SMD -0.38 (-0.5 to -0.26) |
| *The basis for the <b>assumed risk</b> (e.g. the median control group risk across studies) is provided in footnotes. The <b>corresponding risk</b> (and its 95% confidence interval) is based on the assumed risk in the comparison group and the <b>relative effect</b> of the intervention (and its 95% CI).<br><br><b>CI:</b> Confidence interval; <b>SMD:</b> Standardized mean difference                                                                                                                                                              |                                          |                                                                                                                      |                          |                              |                                 |                           |
| GRADE Working Group grades of evidence<br><b>High quality:</b> Further research is very unlikely to change our confidence in the estimate of effect.<br><b>Moderate quality:</b> Further research is likely to have an important impact on our confidence in the estimate of effect and may change the estimate.<br><b>Low quality:</b> Further research is very likely to have an important impact on our confidence in the estimate of effect and is likely to change the estimate.<br><b>Very low quality:</b> We are very uncertain about the estimate. |                                          |                                                                                                                      |                          |                              |                                 |                           |
| <sup>1</sup> Selective reporting, authors had financial ties to industry sponsor                                                                                                                                                                                                                                                                                                                                                                                                                                                                            |                                          |                                                                                                                      |                          |                              |                                 |                           |

### **Clinician Global Impression of Change**

Six studies reported this outcome; four of these reported significant improvements with pregabalin compared with placebo, while two found no significant differences between groups (Appendix Table 3).

### **Anxiety and depression scores**

Four studies were pooled for this outcome. There was no significant difference in HADS-Anxiety scores between groups: SMD -0.12, 95% CI -0.29 to 0.04,  $P=0.14$ ,  $I^2=44\%$ ; the quality of the evidence was moderate (SoF Table 4; Figure S16). There was also no significant difference in HADS-Depression scores between groups: SMD -0.06, 95% CI -0.26 to 0.13,  $P=0.54$ ,  $I^2=60\%$ ; the quality of the evidence was low (SoF Table 4; Appendix Table 1 and Figure S17). One study<sup>42</sup> that did not provide sufficient data for statistical pooling reported significant improvement in the HADS-Anxiety scores in favour of pregabalin, but no significant difference in HADS-depression scores between groups (Appendix Table 1). One study<sup>41</sup> measured anxiety using the VAS anxiety scale and reported significant improvements in QOL scores with fixed- and flexible-dose pregabalin compared with placebo ( $P=0.03$  and  $P=0.02$  respectively).

### **Overall discontinuations**

In total, there were 1,203 drop-outs (approximately 20%) in the 28 trials ( $n=5972$ ) that reported the data (Appendix Table 1). There was no significant difference in overall discontinuation rates between groups, RR 1.09 (95% CI 0.93 to 1.28,  $P=0.29$ ,  $I^2=51\%$ ).

| Summary of Findings Table 4: Effect of pregabalin on anxiety and depression scores in patients with neuropathic pain                                                                                                                                                                                           |                                          |                                                                                                                           |                          |                              |                                      |                           |
|----------------------------------------------------------------------------------------------------------------------------------------------------------------------------------------------------------------------------------------------------------------------------------------------------------------|------------------------------------------|---------------------------------------------------------------------------------------------------------------------------|--------------------------|------------------------------|--------------------------------------|---------------------------|
| Patient or population: patients with Neuropathic pain                                                                                                                                                                                                                                                          |                                          |                                                                                                                           |                          |                              |                                      |                           |
| Settings:                                                                                                                                                                                                                                                                                                      |                                          |                                                                                                                           |                          |                              |                                      |                           |
| Intervention: Effect of pregabalin on anxiety and depression                                                                                                                                                                                                                                                   |                                          |                                                                                                                           |                          |                              |                                      |                           |
| Outcomes                                                                                                                                                                                                                                                                                                       | Illustrative comparative risks* (95% CI) |                                                                                                                           | Relative effect (95% CI) | No of Participants (studies) | Quality of the evidence (GRADE)      | Comments                  |
|                                                                                                                                                                                                                                                                                                                | Assumed risk Control                     | Corresponding risk Effect of pregabalin on anxiety and depression                                                         |                          |                              |                                      |                           |
| HADS-Anxiety                                                                                                                                                                                                                                                                                                   |                                          | The mean hads-anxiety in the intervention groups was <b>0.12 standard deviations lower</b> (0.29 lower to 0.04 higher)    |                          | 1041 (4 studies)             | ⊕⊕⊕⊖<br><b>moderate</b> <sup>1</sup> | SMD -0.12 (-0.29 to 0.04) |
| HADS-Depression                                                                                                                                                                                                                                                                                                |                                          | The mean hads-depression in the intervention groups was <b>0.06 standard deviations lower</b> (0.26 lower to 0.13 higher) |                          | 1041 (4 studies)             | ⊕⊕⊖⊖<br><b>low</b> <sup>1,2</sup>    | SMD -0.06 (-0.26 to 0.13) |
| *The basis for the <b>assumed risk</b> (e.g. the median control group risk across studies) is provided in footnotes. The <b>corresponding risk</b> (and its 95% confidence interval) is based on the assumed risk in the comparison group and the <b>relative effect</b> of the intervention (and its 95% CI). |                                          |                                                                                                                           |                          |                              |                                      |                           |
| CI: Confidence interval; HADS: Hospital anxiety and depression scale; SMD: Standardized mean difference                                                                                                                                                                                                        |                                          |                                                                                                                           |                          |                              |                                      |                           |
| GRADE Working Group grades of evidence                                                                                                                                                                                                                                                                         |                                          |                                                                                                                           |                          |                              |                                      |                           |
| <b>High quality:</b> Further research is very unlikely to change our confidence in the estimate of effect.                                                                                                                                                                                                     |                                          |                                                                                                                           |                          |                              |                                      |                           |
| <b>Moderate quality:</b> Further research is likely to have an important impact on our confidence in the estimate of effect and may change the estimate.                                                                                                                                                       |                                          |                                                                                                                           |                          |                              |                                      |                           |
| <b>Low quality:</b> Further research is very likely to have an important impact on our confidence in the estimate of effect and is likely to change the estimate.                                                                                                                                              |                                          |                                                                                                                           |                          |                              |                                      |                           |
| <b>Very low quality:</b> We are very uncertain about the estimate.                                                                                                                                                                                                                                             |                                          |                                                                                                                           |                          |                              |                                      |                           |
| <sup>1</sup> Selective reporting, authors had financial ties to industry sponsor                                                                                                                                                                                                                               |                                          |                                                                                                                           |                          |                              |                                      |                           |
| <sup>2</sup> Moderate heterogeneity                                                                                                                                                                                                                                                                            |                                          |                                                                                                                           |                          |                              |                                      |                           |



## DISCUSSION

### Summary of the evidence

The evidence from published RCTs suggests that pregabalin reduces pain in patients with neuropathic pain. The effect is statistically significant in peripheral neuropathic pain, but not with central neuropathic pain. Pregabalin significantly increases the risk of adverse events including weight gain, somnolence, dizziness, dry mouth, peripheral oedema, fatigue, visual disturbances, ataxia, non-peripheral oedema, vertigo and euphoria. Pregabalin significantly reduces sleep interference scores compared with placebo. There was insufficient evidence to assess an effect on quality of life. The evidence for PGIC and CGIC scores was mixed among studies that reported these outcomes and there were no significant effects on HADS anxiety and depression scores compared with placebo. There were five deaths in the pregabalin arms and one in the placebo, but insufficient power to detect an overall effect.

### Comparison with the existing literature

We have identified several published reviews assessing the effectiveness of pregabalin the management of neuropathic pain, and our results are partly consistent with these. Zhang et al<sup>46</sup> and Wang et al<sup>47</sup> showed that pregabalin was more efficacious than placebo for treatment of DPN-associated pain and PHN-associated pain respectively; however, the two reviews did not base their results on changes from baseline between groups. Semel et al<sup>48</sup> and Freeman et al<sup>49</sup> also concluded that pregabalin was more effective than placebo for neuropathic pain; however, both reviews did not account for the quality of the included primary studies.

Finnerup et al<sup>50</sup> concluded that there was modest evidence supporting the use of pregabalin for treatment of neuropathic pain; although the authors used GRADE criteria to assess the strength of recommendation, they did not report the quality of the evidence. In an overview of Cochrane reviews, Wiffen et al<sup>51</sup> concluded that there was clinical trial evidence

1  
2  
3 supporting the use of pregabalin for treatment of some aspects of neuropathic pain; however,  
4  
5 the authors did not rate the quality of the evidence for the outcomes reported.  
6  
7

8  
9 Two reviews<sup>52,53</sup> that examined the safety profile of pregabalin concluded that pregabalin use  
10  
11 was significantly more associated with adverse events than placebo; however, both reviews  
12  
13 did not rate the quality of the evidence for the outcomes reported.  
14  
15

### 16 17 18 **Comparison with existing guidelines**

19  
20 We identified several guidelines that recommend the use of pregabalin for treatment of  
21  
22 neuropathic pain, and some of their specifications are consistent with our results. For  
23  
24 instance, the European Federation of Neurological Societies (EFNS) guideline<sup>54</sup> based on  
25  
26 data from comparative studies recommended pregabalin as first line treatment for neuropathic  
27  
28 pain; however, the guidance assessed only the level, but not the quality, of the evidence; and  
29  
30 also notes that there are too few large scale comparative studies to make definite conclusions  
31  
32 about the benefits and harms. Similarly, the American Academy of Neurology, the American  
33  
34 Association of Neuromuscular and Electrodiagnostic Medicine, and the American Academy  
35  
36 of Physical Medicine and Rehabilitation guidance<sup>55</sup> recommends pregabalin as first line  
37  
38 treatment based on levels (and not quality) of the evidence; however, they guidance  
39  
40 recommends that clinical trials of longer duration should be conducted. The Canadian Pain  
41  
42 Society (CPS) guidance<sup>56</sup> recommends pregabalin as first-line treatment for neuropathic pain,  
43  
44 but acknowledges that paucity of longer-duration trials limit the conclusions that can be  
45  
46 drawn about its benefits and harms on the long-term.  
47  
48  
49  
50  
51  
52  
53  
54  
55  
56  
57  
58  
59  
60

### Strengths and limitations

This rapid review has limitations due to its streamlined methods and search strategy. Firstly, the rapid review methodology employed could have introduced selective outcome reporting bias; nevertheless, most of the outcomes reported in this review have been listed as outcomes of interest to be considered when designing trials of neuropathic pain interventions.<sup>57</sup> There is a risk that our review may be prone to sampling bias, and that we may have missed potentially eligible studies, which could have been identified by searching clinical trials registries and grey literature. However, we comprehensively searched the literature, and used standard criteria to assess the risk of bias and rate the quality of the evidence. It has also been reported that generally the conclusions of rapid reviews and full reviews do not greatly differ<sup>58</sup>; and enhanced rapid reviews where data is independently checked by a second reviewer could help policy makers with quicker access to the evidence base.<sup>59</sup> This review therefore provides the most up to date comprehensive summary of the available literature, as it accounts for study quality and reports clinically meaningful patient outcomes. We did not assess the extent to which different doses of pregabalin influenced the outcomes assessed; in addition, the benefits and harms of pregabalin were not analyzed according to specific neuropathic pain conditions; only two subgroups (central and peripheral neuropathic pain) were assessed.

### Implications for research

The quality of the included studies examining efficacy of pregabalin for pain was rated as low or very low according to the GRADE framework. This highlights the need for larger, robust, high-quality clinical trials to be conducted, with particular attention paid to minimizing selective reporting of outcomes. Concerns about selective reporting could be mitigated if drug manufacturers enabled access to clinical study reports (CSRs), especially as

1 industry-sponsored trials are likely to skew reports in favour of benefits over harms.<sup>60,61</sup> This  
2  
3 would allow for a more comprehensive assessment of the benefits and harms of pregabalin.  
4  
5 Of note, all the included trials were industry-sponsored, and an overwhelming majority of the  
6  
7 authors of the include studies had financial ties to the pharmaceutical industry. Of note, the  
8  
9 results of the only published charity-funded phase IV placebo-controlled trial that assessed  
10  
11 the effectiveness of pregabalin in management of neuropathic (radicular) pain contrast our  
12  
13 meta-analysis results – there was no significant difference in pain scores between groups.<sup>62</sup>  
14  
15 Independent and publicly funded trials assessing the benefits and harms of pregabalin should  
16  
17 be conducted. Only a few studies assessed the effect of pregabalin in improving quality of  
18  
19 life, anxiety and depression and CGIC. Future trials should further assess the role of  
20  
21 pregabalin for these outcomes. Studies investigating the type of neuropathic pain pregabalin  
22  
23 relieves (e.g. stimulus-dependent pain such as hyperalgesia or allodynia), or spontaneous pain  
24  
25 could be an area of consideration for future research.  
26  
27  
28  
29  
30

31  
32  
33 That the median duration of intervention was nine weeks suggests that the intermediate to  
34  
35 longer term benefits of pregabalin for neuropathic pain are unproven. Indeed in real life  
36  
37 clinical care, it has been reported that the initial benefits seen with use of the drug in patients  
38  
39 with neuropathic pain were no longer apparent after 6 to 12 months of therapy.<sup>63</sup> Therefore,  
40  
41 RCTs that are adequately powered, and with longer durations of interventions are desirable.  
42  
43 The finding of 5 deaths among 891 participants on pregabalin, vs 1 death among 320  
44  
45 participants on placebo, is somewhat concerning. Given the low frequency of this outcome  
46  
47 (coupled with the short trial durations), RCTs are unlikely to be informative; we suggest  
48  
49 pharmacoepidemiological studies in routinely collected electronic health records and  
50  
51 spontaneous reporting databases to assess the impact of pregabalin on mortality.  
52  
53  
54  
55  
56  
57  
58  
59  
60

### **Implications for clinical practice**

Very low-to-moderate quality evidence suggests that pregabalin improves some symptoms of neuropathic pain. However, it significantly increases the risk of adverse events including somnolence, oedema, visual disturbances, ataxia, vertigo and euphoria. Pregabalin also increases the risk of drug discontinuation because of adverse events. Clinicians should be cautious about prescribing pregabalin, and should consider whether its benefits outweigh potential harms in individual patients.

### **Conclusions**

The evidence from RCTs in journal publications suggests that pregabalin has beneficial effects on some symptoms of neuropathic pain. However, its use significantly increases the risk of adverse events and discontinuation due to adverse events. The quality of the evidence from journal publications is overall low, and the duration of trials is short. Greater transparency in the reporting of outcomes is advocated; independent and publicly funded trials assessing the effects of pregabalin in neuropathic pain should be encouraged. Allowing researchers access to full CSRs of pregabalin trials should be a priority for drug companies and regulators.

### **Acknowledgement**

IJO, BG and CJH are part of the Evidence Synthesis Working Group. The Evidence Synthesis Working Group is funded by the National Institute for Health Research School for Primary Care Research (NIHR SPCR) [ProjectNumber 390]. JL is supported by an NIHR In Practice Fellowship. The views expressed are those of the author(s) and not necessarily those of the NIHR, the NHS or the Department of Health.

### **Funding**

None

### **Data sharing statement**

No additional data available

### **Authors' Contribution**

IJO was involved with devising the review methods, conducting electronic searches, screening of abstracts, data extraction, data analysis and interpretation, and co-drafting of the review. ETT was involved with devising the review methods, screening of abstracts, data extraction, data analysis and interpretation, and co-drafting of the review. JL was involved with data extraction, data analysis and interpretation, and co-drafting of the review. BG was involved with devising the review methods, data analysis and interpretation, and co-drafting of the review. CJH was involved with devising the review methods, data analysis and interpretation, and co-drafting of the review.

### **Copyright/license for publication**

The Corresponding Author has the right to grant on behalf of all authors and does grant on behalf of all authors, a worldwide licence to the Publishers and its licensees in perpetuity, in all forms, formats and media (whether known now or created in the future), to i) publish, reproduce, distribute, display and store the Contribution, ii) translate the Contribution into other languages, create adaptations, reprints, include within collections and create summaries, extracts and/or, abstracts of the Contribution, iii) create any other derivative work(s) based on the Contribution, iv) to exploit all subsidiary rights in the Contribution, v) the inclusion of electronic links from the Contribution to third party material where-ever it may be located; and, vi) licence any third party to do any or all of the above.

### **Competing interests**

All authors have completed the ICMJE uniform disclosure form at [http://www.icmje.org/coi\\_disclosure.pdf](http://www.icmje.org/coi_disclosure.pdf) (available on request from the corresponding author). CJH has received expenses and fees for his media work. He has received expenses from the WHO, FDA, and holds grant funding from the NIHR, the NIHR School of Primary Care Research, The Wellcome Trust and the WHO. He has received financial remuneration from an asbestos case. He has also received income from the publication of a series of toolkit books published by Blackwells. On occasion, he receives expenses for teaching EBM and is also paid for his GP work in NHS out of hours. CEBM jointly runs the EvidenceLive

1  
2  
3 Conference with the BMJ and the Overdiagnosis Conference with some international partners  
4 which are based on a non-profit making model. BG receives funding from the Laura and John  
5 Arnold Foundation and reports personal fees from intermittent additional personal income  
6 from speaking and writing for lay audiences on problems in science and medicine including  
7 regulatory shortcomings. IJO, ETT and JL have no interests to disclose.  
8  
9  
10

### 11 12 **Transparency declaration**

13  
14 The lead author (the manuscript's guarantor) affirms that the manuscript is an honest,  
15 accurate, and transparent account of the study being reported; that no important aspects of the  
16 study have been omitted; and that any discrepancies from the study as planned (and, if  
17 relevant, registered) have been explained.  
18  
19  
20  
21  
22  
23  
24  
25  
26  
27  
28  
29  
30  
31  
32  
33  
34  
35  
36  
37  
38  
39  
40  
41  
42  
43  
44  
45  
46  
47  
48  
49  
50  
51  
52  
53  
54  
55  
56  
57  
58  
59  
60

## REFERENCES

- 1 Verma V, Singh N, Singh Jaggi A. Pregabalin in neuropathic pain: evidences and possible mechanisms. *Curr Neuropharmacol*. 2014 Jan;12(1):44-56.
- 2 Taylor CP, Angelotti T, Fauman E. Pharmacology and mechanism of action of pregabalin: the calcium channel alpha2-delta (alpha2-delta) subunit as a target for antiepileptic drug discovery. *Epilepsy Res*. 2007 Feb;73(2):137-50
- 3 Goodman CW, Brett AS. Gabapentin and Pregabalin for Pain - Is Increased Prescribing a Cause for Concern? *N Engl J Med*. 2017 Aug 3;377(5):411-414.
- 4 Spence D. Bad medicine: gabapentin and pregabalin. *BMJ*. 2013 Nov 8;347:f6747. doi: 10.1136/bmj.f6747.
- 5 OpenPrescribing.net. High-level prescribing trends for Pregabalin (BNF code 0408010AE) across all GP practices in NHS England, since August 2010. Available at: <https://openprescribing.net/chemical/0408010AE/> [Last accessed 8th March, 2018]
- 6 Wang Y, Yang H, Shen C, Luo J. Morphine and pregabalin in the treatment of neuropathic pain. *Exp Ther Med*. 2017 Apr;13(4):1393-1397.
- 7 Lyndon A, Audrey S, Wells C, et al. Risk to heroin users of polydrug use of pregabalin or gabapentin. *Addiction*. 2017 Sep;112(9):1580-1589
- 8 Morrison EE, Sandilands EA, Webb DJ. Gabapentin and pregabalin: do the benefits outweigh the harms? *J R Coll Physicians Edinb* 2017; 47: 310–3
- 9 Iacobucci G. UK government to reclassify pregabalin and gabapentin after rise in deaths. *BMJ*. 2017 Sep 25;358:j4441. doi: 10.1136/bmj.j4441.
- 10 Ganann R, Ciliska D, Thomas H. Expediting systematic reviews: methods and implications of rapid reviews. *Implement Sci*. 2010 Jul 19;5:56. doi: 10.1186/1748-5908-5-56.



- 1  
2  
3  
4 11 International Association for the Study of Pain. What is neuropathic pain?  
5  
6 [https://s3.amazonaws.com/rdcms-](https://s3.amazonaws.com/rdcms-iasp/files/production/public/AM/Images/GYAP/What%20is%20Neuropathic%20Pain.pdf)  
7  
8 [iasp/files/production/public/AM/Images/GYAP/What%20is%20Neuropathic%20Pain.pdf](https://s3.amazonaws.com/rdcms-iasp/files/production/public/AM/Images/GYAP/What%20is%20Neuropathic%20Pain.pdf)  
9  
10 [Accessed 19th January, 2018]  
11  
12 12 Sullivan GM. A Primer on the Validity of Assessment Instruments. *J Grad Med Educ*.  
13  
14 2011 Jun;3(2):119-20.  
15  
16 13 Higgins JP, Altman DG, Gøtzsche PC, et al. The Cochrane Collaboration's tool for  
17  
18 assessing risk of bias in randomised trials. *Br Med J* 2011; 343: d5928–d5928  
19  
20  
21 14 Review Manager (RevMan) (Computer program). Version 5.3. Copenhagen: The Nordic  
22  
23 Cochrane Centre, The Cochrane Collaboration, 2011  
24  
25 15 Furukawa TA, Barbui C, Cipriani A, Brambilla P, Watanabe N. Imputing missing  
26  
27 standard deviations in meta-analyses can provide accurate results. *J Clin Epidemiol*. 2006  
28  
29 Jan;59(1):7-10.  
30  
31 16 GRADEpro. Computer program on [www.gradepr.org](http://www.gradepr.org). Version 3.6. McMaster  
32  
33 University, 2014.  
34  
35 17 GRADE Working Group. Grading quality of evidence and strength of recommendations.  
36  
37 *BMJ* 2004; 328(7454): 1490.  
38  
39 18 Arezzo JC, Rosenstock J, Lamoreaux L, Pauer L. Efficacy and safety of pregabalin 600  
40  
41 mg/d for treating painful diabetic peripheral neuropathy: a double-blind placebo-controlled  
42  
43 trial. *BMC Neurol*. 2008 Sep 16;8:33. doi: 10.1186/1471-2377-8-33.  
44  
45  
46 19 Cardenas DD, Nieshoff EC, Suda K, et al. A randomized trial of pregabalin in patients  
47  
48 with neuropathic pain due to spinal cord injury. *Neurology*. 2013 Feb 5;80(6):533-9.  
49  
50 20 Dworkin RH, Corbin AE, Young JP Jr, et al. Pregabalin for the treatment of postherpetic  
51  
52 neuralgia: a randomized, placebo-controlled trial. *Neurology*. 2003 Apr 22;60(8):1274-83.  
53  
54  
55  
56  
57  
58  
59  
60

- 1  
2  
3  
4 21 Freynhagen R, Strojek K, Griesing T, Whalen E, Balkenohl M. Efficacy of pregabalin in  
5  
6 neuropathic pain evaluated in a 12-week, randomised, double-blind, multicentre, placebo-  
7  
8 controlled trial of flexible- and fixed-dose regimens. *Pain*. 2005 Jun;115(3):254-63.  
9
- 10 22 Guan Y, Ding X, Cheng Y, et al. Efficacy of pregabalin for peripheral neuropathic pain:  
11  
12 results of an 8-week, flexible-dose, double-blind, placebo-controlled study conducted in  
13  
14 China. *Clin Ther*. 2011 Feb;33(2):159-66  
15
- 16 23 Holbech JV, Bach FW, Finnerup NB, Brøsen K, Jensen TS, Sindrup SH. Imipramine and  
17  
18 pregabalin combination for painful polyneuropathy: a randomized controlled trial. *Pain*.  
19  
20 2015 May;156(5):958-66  
21  
22
- 23 24 Huffman CL, Goldenberg JN, Weintraub J, et al. Efficacy and Safety of Once-Daily  
24  
25 Controlled-Release Pregabalin for the Treatment of Patients With Postherpetic Neuralgia:  
26  
27 A Double-Blind, Enriched Enrollment Randomized Withdrawal, Placebo-Controlled Trial.  
28  
29 *Clin J Pain*. 2017 Jul;33(7):569-578.  
30  
31
- 32 25 Kanodia SK, Singhal KC. A study on efficacy of Pregabalin in acute Herpetic Neuralgia.  
33  
34 *Ann Neurosci*. 2011 Oct;18(4):148-50.  
35
- 36 26 Kim JS, Bashford G, Murphy TK, Martin A, Dror V, Cheung R. Safety and efficacy of  
37  
38 pregabalin in patients with central post-stroke pain. *Pain*. 2011 May;152(5):1018-23.  
39
- 40 27 Krcevski Skvarc N, Kamenik M. Effects of pregabalin on acute herpetic pain and  
41  
42 postherpetic neuralgia incidence. *Wien Klin Wochenschr*. 2010 May;122 Suppl 2:49-53  
43  
44
- 45 28 Lesser H, Sharma U, LaMoreaux L, Poole RM. Pregabalin relieves symptoms of painful  
46  
47 diabetic neuropathy: a randomized controlled trial. *Neurology*. 2004 Dec 14;63(11):2104-  
48  
49 10.  
50
- 51 29 Liu Q, Chen H, Xi L, et al. A Randomized, Double-blind, Placebo-controlled Trial to  
52  
53 Evaluate the Efficacy and Safety of Pregabalin for Postherpetic Neuralgia in a Population  
54  
55 of Chinese Patients. *Pain Pract*. 2017 Jan;17(1):62-69.  
56  
57  
58  
59  
60

- 1  
2  
3  
4 30 Mathieson S, Maher CG, McLachlan AJ, et al. Trial of Pregabalin for Acute and Chronic  
5  
6        Sciatica. *N Engl J Med*. 2017 Mar 23;376(12):1111-1120.  
7
- 8 31 Moon DE, Lee DI, Lee SC, et al. Efficacy and tolerability of pregabalin using a flexible,  
9  
10        optimized dose schedule in Korean patients with peripheral neuropathic pain: a 10-week,  
11  
12        randomized, double-blind, placebo-controlled, multicenter study. *Clin Ther*. 2010  
13  
14        Dec;32(14):2370-85.  
15
- 16 32 Rauck R, Makumi CW, Schwartz S, et al. A randomized, controlled trial of gabapentin  
17  
18        enacarbil in subjects with neuropathic pain associated with diabetic peripheral neuropathy.  
19  
20        *Pain Pract*. 2013 Jul;13(6):485-96.  
21  
22
- 23 33 Richter RW, Portenoy R, Sharma U, Lamoreaux L, Bockbrader H, Knapp LE. Relief of  
24  
25        painful diabetic peripheral neuropathy with pregabalin: a randomized, placebo-controlled  
26  
27        trial. *J Pain*. 2005 Apr;6(4):253-60.  
28  
29
- 30 34 Rosenstock J, Tuchman M, LaMoreaux L, Sharma U. Pregabalin for the treatment of  
31  
32        painful diabetic peripheral neuropathy: a double-blind, placebo-controlled trial. *Pain*. 2004  
33  
34        Aug;110(3):628-38.  
35
- 36 35 Sabatowski R, Gálvez R, Cherry DA, et al. Pregabalin reduces pain and improves sleep  
37  
38        and mood disturbances in patients with post-herpetic neuralgia: results of a randomised,  
39  
40        placebo-controlled clinical trial. *Pain*. 2004 May;109(1-2):26-35.  
41  
42
- 43 36 Satoh J, Yagihashi S, Baba M, et al. Efficacy and safety of pregabalin for treating  
44  
45        neuropathic pain associated with diabetic peripheral neuropathy: a 14 week, randomized,  
46  
47        double-blind, placebo-controlled trial. *Diabet Med*. 2011 Jan;28(1):109-16.  
48
- 49 37 Shabbir B, Shafi F, Mahboob F. Amitriptyline Vs Pregabalin in Painful Diabetic  
50  
51        Neuropathy A Randomised Placebo-Based Study. *P J M H S* 2011; 5(4): 745-747  
52  
53  
54  
55  
56  
57  
58  
59  
60

- 1  
2  
3  
4 38 Siddall PJ, Cousins MJ, Otte A, Griesing T, Chambers R, Murphy TK. Pregabalin in  
5  
6 central neuropathic pain associated with spinal cord injury: a placebo-controlled trial.  
7  
8 Neurology. 2006 Nov 28;67(10):1792-800.  
9
- 10 39 Simpson DM, Schifitto G, Clifford DB, et al. Pregabalin for painful HIV neuropathy: a  
11  
12 randomized, double-blind, placebo-controlled trial. Neurology. 2010 Feb 2;74(5):413-20.  
13
- 14 40 Simpson DM, Rice AS, Emir B, Landen J, Semel D, Chew ML, Sporn J. A randomized,  
15  
16 double-blind, placebo-controlled trial and open-label extension study to evaluate the  
17  
18 efficacy and safety of pregabalin in the treatment of neuropathic pain associated with  
19  
20 human immunodeficiency virus neuropathy. Pain. 2014 Oct;155(10):1943-54.  
21
- 22 41 Stacey BR, Barrett JA, Whalen E, Phillips KF, Rowbotham MC. Pregabalin for  
23  
24 postherpetic neuralgia: placebo-controlled trial of fixed and flexible dosing regimens on  
25  
26 allodynia and time to onset of pain relief. J Pain. 2008 Nov;9(11):1006-17  
27
- 28 42 Tölle T, Freynhagen R, Versavel M, Trostmann U, Young JP Jr. Pregabalin for relief of  
29  
30 neuropathic pain associated with diabetic neuropathy: a randomized, double-blind study.  
31  
32 Eur J Pain. 2008 Feb;12(2):203-13.  
33
- 34 43 van Seventer R, Feister HA, Young JP Jr, Stoker M, Versavel M, Rigaudy L. Efficacy and  
35  
36 tolerability of twice-daily pregabalin for treating pain and related sleep interference in  
37  
38 postherpetic neuralgia: a 13-week, randomized trial. Curr Med Res Opin. 2006  
39  
40 Feb;22(2):375-84.  
41
- 42 44 van Seventer R, Bach FW, Toth CC, Serpell M, Temple J, Murphy TK, Nimour M.  
43  
44 Pregabalin in the treatment of post-traumatic peripheral neuropathic pain: a randomized  
45  
46 double-blind trial. Eur J Neurol. 2010 Aug;17(8):1082-9.  
47
- 48 45 Vranken JH, Dijkgraaf MG, Kruis MR, van der Vegt MH, Hollmann MW, Heesen M.  
49  
50 Pregabalin in patients with central neuropathic pain: a randomized, double-blind, placebo-  
51  
52 controlled trial of a flexible-dose regimen. Pain. 2008 May;136(1-2):150-7.  
53  
54  
55  
56  
57  
58  
59  
60

- 1  
2  
3  
4 47. Watt A, Cameron A, Sturm L, Lathlean T, Babidge W, Blamey S. Rapid versus full  
5  
6 systematic reviews: validity in clinical practice? *ANZ J Surg* 2008. 78:1037-40.  
7  
8 46 Zhang SS, Wu Z, Zhang LC, et al. Efficacy and safety of pregabalin for treating painful  
9  
10 diabetic peripheral neuropathy: a meta-analysis. *Acta Anaesthesiol Scand*. 2015  
11  
12 Feb;59(2):147-59.  
13  
14 47 Wang SL, Wang H, Nie HY, Bu G, Shen XD, Wang H. The efficacy of pregabalin for  
15  
16 acute pain control in herpetic neuralgia patients: A meta-analysis. *Medicine (Baltimore)*.  
17  
18 2017 Dec;96(51):e9167.  
19  
20  
21 48 Semel D, Murphy TK, Zlateva G, Cheung R, Emir B. Evaluation of the safety and  
22  
23 efficacy of pregabalin in older patients with neuropathic pain: results from a pooled  
24  
25 analysis of 11 clinical studies. *BMC Fam Pract*. 2010 Nov 5;11:85. doi: 10.1186/1471-  
26  
27 2296-11-85.  
28  
29  
30 49 Freeman R, Durso-Decruz E, Emir B. Efficacy, safety, and tolerability of pregabalin  
31  
32 treatment for painful diabetic peripheral neuropathy: findings from seven randomized,  
33  
34 controlled trials across a range of doses. *Diabetes Care*. 2008 Jul;31(7):1448-54.  
35  
36  
37 50 Finnerup NB, Attal N, Haroutounian S, et al. Pharmacotherapy for neuropathic pain in  
38  
39 adults: a systematic review and meta-analysis. *Lancet Neurol*. 2015 Feb;14(2):162-73.  
40  
41 51 Wiffen PJ, Derry S, Moore RA, et al. Antiepileptic drugs for neuropathic pain and  
42  
43 fibromyalgia - an overview of Cochrane reviews. *Cochrane Database Syst Rev*. 2013 Nov  
44  
45 11;(11):CD010567.  
46  
47 52 Zaccara G, Gangemi P, Perucca P, Specchio L. The adverse event profile of pregabalin: a  
48  
49 systematic review and meta-analysis of randomized controlled trials. *Epilepsia*. 2011  
50  
51 Apr;52(4):826-36.  
52  
53 53 Freynhagen R, Serpell M, Emir B, et al. A comprehensive drug safety evaluation of  
54  
55 pregabalin in peripheral neuropathic pain. *Pain Pract*. 2015 Jan;15(1):47-57.  
56  
57  
58  
59  
60

- 
- 1  
2  
3  
4 54 Attal N, Cruccu G, Baron R, et al. EFNS guidelines on the pharmacological treatment of  
5  
6 neuropathic pain: 2010 revision. *Eur J Neurol*. 2010 Sep;17(9):1113-e88.  
7
- 8 55 Bril V, England J, Franklin GM, et al. Evidence-based guideline: Treatment of painful  
9  
10 diabetic neuropathy: report of the American Academy of Neurology, the American  
11  
12 Association of Neuromuscular and Electrodiagnostic Medicine, and the American  
13  
14 Academy of Physical Medicine and Rehabilitation. *Neurology*. 2011 May 17;76(20):1758-  
15  
16 65.  
17
- 18 56 Moulin D, Boulanger A, Clark AJ, Clarke H, Dao T, Finley GA, et al. Pharmacological  
19  
20 management of chronic neuropathic pain: revised consensus statement from the Canadian  
21  
22 Pain Society. *Pain Res Manag*. 2014 Nov-Dec;19(6):328-35.  
23  
24
- 25 57 Gilron I. Methodological issues associated with clinical trials in neuropathic pain. *Expert*  
26  
27 *Rev Clin Pharmacol*. 2016 Nov;9(11):1399-1402  
28
- 29 58 Ganann R, Ciliska D, Thomas H. Expediting systematic reviews: methods and  
30  
31 implications of rapid reviews. *Implement Sci*. 2010 Jul 19;5:56. doi: 10.1186/1748-5908-  
32  
33 5-56.  
34  
35
- 36 59 Taylor-Phillips S, Geppert J, Stinton C, et al. Comparison of a full systematic review  
37  
38 versus rapid review approaches to assess a newborn screening test for tyrosinemia type 1.  
39  
40 *Res Synth Methods*. 2017 Dec;8(4):475-484.  
41  
42
- 43 60 Flacco ME, Manzoli L, Boccia S, et al. Head-to-head randomized trials are mostly  
44  
45 industry sponsored and almost always favor the industry sponsor. *J Clin Epidemiol*. 2015  
46  
47 Jul;68(7):811-20.  
48
- 49 61 Lundh A, Lexchin J, Mintzes B, Schroll JB, Bero L. Industry sponsorship and research  
50  
51 outcome. *Cochrane Database Syst Rev*. 2017 Feb 16;2:MR000033.  
52  
53  
54  
55  
56  
57  
58  
59  
60

1  
2  
3  
4 62 Malik KM, Nelson AM, Avram MJ, Robak SL, Benzon HT. Efficacy of Pregabalin in the  
5  
6 Treatment of Radicular Pain: Results of a Controlled Trial. *Anesth Pain Med*. 2015 Aug  
7  
8 22;5(4):e28110.  
9

10 63 NHS Gloucestershire. Guidance for Review of Patients taking Pregabalin for Neuropathic  
11  
12 Pain. Available at:

13  
14 [http://www.gloshospitals.nhs.uk/SharePoint19/Chronic%20and%20Acute%20Pain%20Ser](http://www.gloshospitals.nhs.uk/SharePoint19/Chronic%20and%20Acute%20Pain%20Services%20Web%20Documents/Pregabalin%20review%20(neuropathic%20pain)%20mg%204%20(2).pdf)  
15  
16 [vices%20Web%20Documents/Pregabalin%20review%20\(neuropathic%20pain\)%20mg%](http://www.gloshospitals.nhs.uk/SharePoint19/Chronic%20and%20Acute%20Pain%20Services%20Web%20Documents/Pregabalin%20review%20(neuropathic%20pain)%20mg%204%20(2).pdf)  
17  
18 [204%20\(2\).pdf](http://www.gloshospitals.nhs.uk/SharePoint19/Chronic%20and%20Acute%20Pain%20Services%20Web%20Documents/Pregabalin%20review%20(neuropathic%20pain)%20mg%204%20(2).pdf) [Last accessed 1st March, 2018].  
19  
20  
21  
22  
23  
24  
25  
26  
27  
28  
29  
30  
31  
32  
33  
34  
35  
36  
37  
38  
39  
40  
41  
42  
43  
44  
45  
46  
47  
48  
49  
50  
51  
52  
53  
54  
55  
56  
57  
58  
59  
60

---

**Figure legends**

**Figure 1:** Flow chart showing the process for inclusion of RCTs assessing the effects of pregabalin in the management of neuropathic pain

**Figure 2:** Graphical representation of the risk of bias in RCTs assessing the effects of pregabalin in the management of neuropathic pain

**Figure 3:** Risk of bias summary for RCTs assessing the effects of pregabalin in the management of neuropathic pain

**Figure 4:** Effect of pregabalin on pain scores in patients with neuropathic pain

**Figure 5:** Effect of pregabalin on the risk of adverse events in patients with neuropathic pain



**Figure 1: Flow chart showing the process for inclusion of RCTs assessing the effects of pregabalin in the management of neuropathic pain**

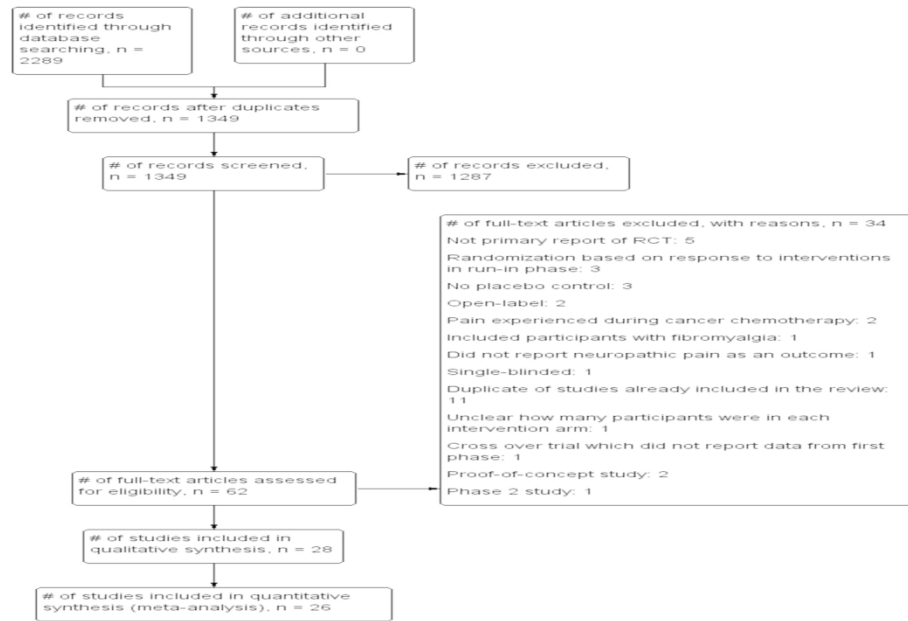

254x190mm (300 x 300 DPI)

**Figure 2: Graphical representation of the risk of bias in RCTs assessing the effects of pregabalin in the management of neuropathic pain**

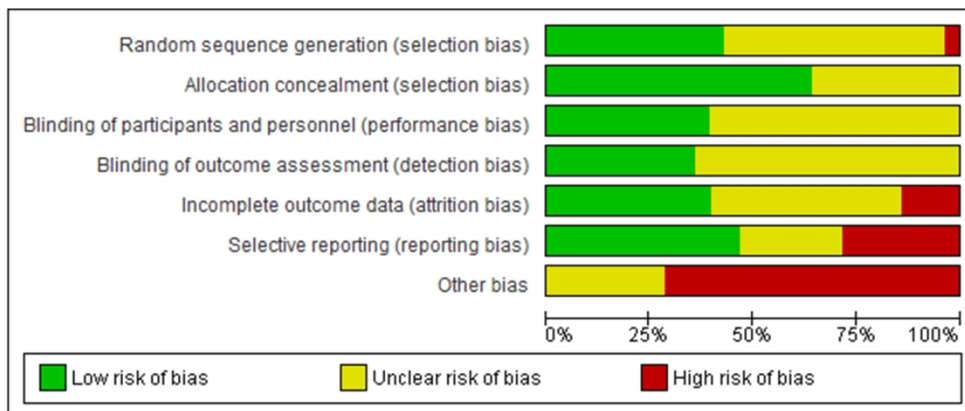

254x190mm (300 x 300 DPI)

**Figure 3: Risk of bias summary for RCTs assessing the effects of pregabalin in the management of neuropathic pain**

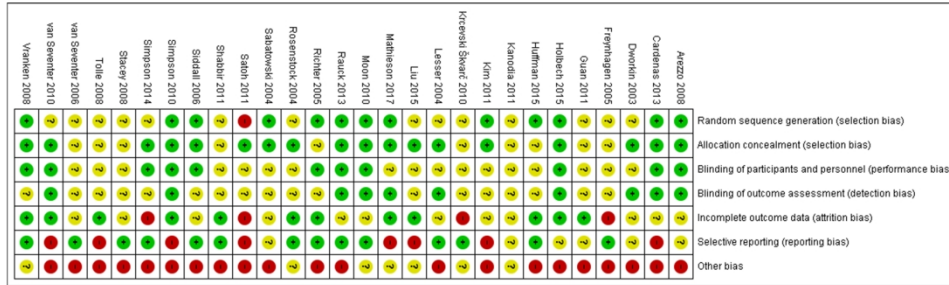

254x190mm (300 x 300 DPI)

**Figure 4: Effect of pregabalin on pain scores in patients with neuropathic pain**

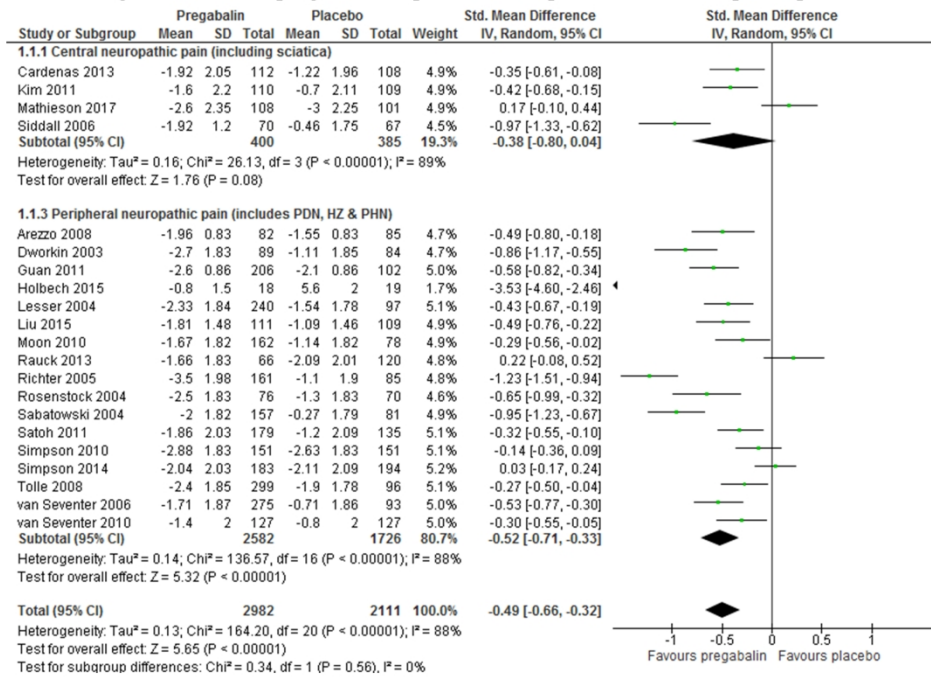

254x190mm (300 x 300 DPI)

**Figure 5: Effect of pregabalin on the risk of adverse events in patients with neuropathic pain**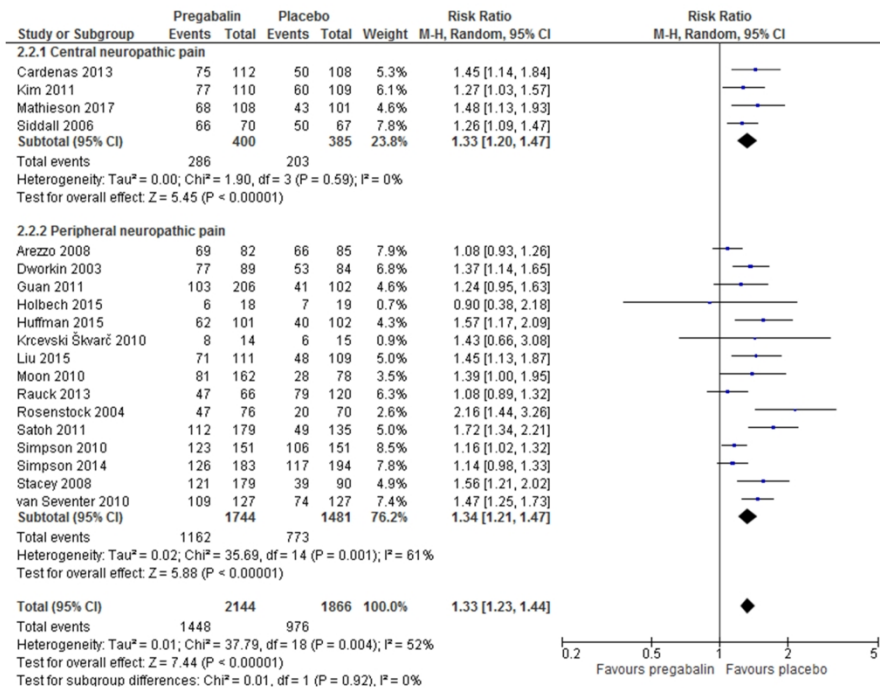

254x190mm (300 x 300 DPI)

**Appendix Table 1: Benefits and harms of pregabalin in the management of neuropathic pain**

| Outcome                                        | Overall analysis                                                        | Subgroup analyses                                                      |                                                                          | Test for subgroup differences   |
|------------------------------------------------|-------------------------------------------------------------------------|------------------------------------------------------------------------|--------------------------------------------------------------------------|---------------------------------|
|                                                |                                                                         | Central neuropathic pain                                               | Peripheral neuropathic pain                                              |                                 |
| Mean change in pain scores - NRS               | (n = 5093): SMD -0.49 (-0.66 to -0.32, P < 0.00001, I <sup>2</sup> =88% | (n = 785): SMD -0.38 (-0.80 to 0.04), P = 0.08, I <sup>2</sup> =89%    | (n = 4308): SMD -0.52 (-0.71 to -0.33), P < 0.00001, I <sup>2</sup> =88% | P = 0.56, I <sup>2</sup> =0%    |
| Mean change in sleep interference scores - NRS | (n = 1641): SMD -0.38 (-0.50 to -0.26, P < 0.00001, I <sup>2</sup> =32% | (n = 357): SMD -0.49 (-0.70 to -0.28), P < 0.00001, I <sup>2</sup> =0% | (n = 1284): SMD -0.35 (-0.50 to -0.19), P < 0.0001, I <sup>2</sup> =45%  | P = 0.30, I <sup>2</sup> =8%    |
| Mean change in HADS-anxiety scores             | (n = 1041): SMD -0.12 (-0.29 to 0.04, P = 0.14, I <sup>2</sup> =44%     | (n = 418): SMD -0.27 (-0.46 to -0.08, P = 0.006, I <sup>2</sup> =0%    | (n = 623): SMD -0.00 (-0.16 to 0.15, P = 0.97, I <sup>2</sup> =0%        | P = 0.04, I <sup>2</sup> =77.2% |
| Mean change in HADS-depression scores          | (n = 1041): SMD -0.06 (-0.26 to 0.13, P = 0.54, I <sup>2</sup> =60%     | (n = 418): SMD -0.16 (-0.41 to 0.10, P = 0.23, I <sup>2</sup> =44%     | (n = 623): SMD 0.02 (-0.28 to 0.32, P = 0.90, I <sup>2</sup> =71%        | P = 0.38, I <sup>2</sup> =8%    |
| Overall adverse events                         | (n = 4010): RR 1.33 (1.23 to 1.44), P < 0.00001, I <sup>2</sup> =52%    | (n = 489): RR 1.33 (1.20 to 1.47), P < 0.00001, I <sup>2</sup> =0%     | (n = 3225): RR 1.34 (1.21 to 1.47), P < 0.00001, I <sup>2</sup> =61%     | P = 0.92, I <sup>2</sup> =0%    |
| Adverse event: weight gain                     | (n = 3636): RR 4.58, (2.88 to 7.28), P < 0.00001, I <sup>2</sup> =0%    | (n = 428): RR 3.77 (0.94 to 15.08), P = 0.06, I <sup>2</sup> =0%       | (n = 3636): RR 4.69 (2.87 to 7.68), P < 0.00001, I <sup>2</sup> =0%      | P = 0.77, I <sup>2</sup> =0%    |
| Adverse event: somnolence                      | (n = 5695): RR 2.84, (2.36 to 3.42), P < 0.00001, I <sup>2</sup> =0%    | (n = 785): RR 3.18 (2.16 to 4.68), P < 0.00001, I <sup>2</sup> =0%     | (n = 4910): RR 2.74 (2.22 to 3.40), P < 0.00001, I <sup>2</sup> =1%      | P = 0.51, I <sup>2</sup> =0%    |
| Adverse event: dizziness                       | (n = 5732): RR 2.94 (2.30 to 3.74), P < 0.00001, I <sup>2</sup> =63%    | (n = 785): RR 3.38 (2.46 to 4.63), P < 0.00001, I <sup>2</sup> =0%     | (n = 4947): RR 2.89 (2.17 to 3.85), P < 0.00001, I <sup>2</sup> =67%     | P = 0.48, I <sup>2</sup> =0%    |
| Adverse event: peripheral edema                | (n = 5001): RR 2.63 (1.86 to 3.73), P < 0.00001, I <sup>2</sup> =41%    | (n = 439): RR 3.90 (1.63 to 9.36), P = 0.002, I <sup>2</sup> =0%       | (n = 4562): RR 2.53 (1.74 to 3.68), P < 0.00001, I <sup>2</sup> =44%     | P = 0.37, I <sup>2</sup> =0%    |
| Adverse event: fatigue*                        | (n = 3958): RR 1.83 (1.32 to 2.54), P = 0.0003, I <sup>2</sup> =14%     | N/A                                                                    | N/A                                                                      | N/A                             |
| Adverse event: visual disturbance              | (n = 2814): RR 2.50 (1.53 to 4.09), P = 0.0003, I <sup>2</sup> =6%      | (n = 566): RR 4.05 (1.27 to 12.91), P = 0.02, I <sup>2</sup> =0%       | (n = 2248): RR 2.36 (1.32 to 4.22), P = 0.004, I <sup>2</sup> =16%       | P = 0.42, I <sup>2</sup> =0%    |
| Adverse event: ataxia**                        | (n = 1045): RR 5.49 (1.84 to 16.36), P = 0.002, I <sup>2</sup> =0%      | N/A                                                                    | N/A                                                                      | N/A                             |
| Adverse event: dry mouth                       | (n = 3873): RR 2.39 (1.66 to 3.44), P < 0.0001, I <sup>2</sup> =16%     | (n = 357): RR 3.75 (1.43 to 9.83), P = 0.007, I <sup>2</sup> =0%       | (n = 3516): RR 2.28 (1.52 to 3.41), P < 0.0001, I <sup>2</sup> =20%      | P = 0.35, I <sup>2</sup> =0%    |
| Adverse event: non-peripheral edema            | (n = 2337): RR 3.51 (1.93 to 6.40), P < 0.0001, I <sup>2</sup> =0%      | (n = 785): RR 3.82 (1.65 to 8.85), P = 0.002, I <sup>2</sup> =0%       | (n = 1552): RR 3.70 (1.36 to 10.06), P = 0.01, I <sup>2</sup> =19%       | P = 0.96, I <sup>2</sup> =0%    |
| Adverse event: vertigo**                       | (n = 1031): RR 3.08 (1.01 to 9.40), P = 0.05, I <sup>2</sup> =30%       | N/A                                                                    | N/A                                                                      | N/A                             |
| Adverse event: euphoria*                       | (n = 1274): RR 8.80 (2.72 to 28.54), P = 0.0003, I <sup>2</sup> =0%     | N/A                                                                    | N/A                                                                      | N/A                             |
| Discontinuation due to adverse events          | (n = 5426): RR 1.91 (1.54 to 2.37), P < 0.00001, I <sup>2</sup> =0%     | (n = 576): RR 1.42 (0.79 to 2.55), P = 0.24, I <sup>2</sup> =0%        | (n = 4850): RR 2.00 (1.58 to 2.55), P < 0.00001, I <sup>2</sup> =6%      | P = 0.29, I <sup>2</sup> =12%   |

Abbreviations: HADS: Hospital anxiety depression scale; NRS: Numerical rating scale; RR: Risk ratio; SMD: Standardized mean difference

\*only one RCT on central neuropathic pain reported adequate data

\*\*all RCTs were in patients with peripheral neuropathic pain

1  
2  
3  
4  
5  
6  
7  
8  
9  
10  
11  
12  
13  
14  
15  
16  
17  
18  
19  
20  
21  
22  
23  
24  
25  
26  
27  
28  
29  
30  
31  
32  
33  
34  
35  
36  
37  
38  
39  
40  
41  
42  
43  
44  
45  
46  
47

For peer review only

1  
2  
3  
4**Appendix Table 2: Sensitivity analyses by study quality and duration in clinical trials assessing the benefits and harms of pregabalin in neuropathic pain**

| Outcome                               | Sensitivity analysis based on higher quality studies*                          | Sensitivity analysis based on shorter duration of intervention**                    | Sensitivity analysis based on longer duration of intervention***                   |
|---------------------------------------|--------------------------------------------------------------------------------|-------------------------------------------------------------------------------------|------------------------------------------------------------------------------------|
| Pain                                  | 5 studies (n = 932): SMD -0.56 (-1.07 to -0.05; P = 0.03; I <sup>2</sup> =92%) | 10 studies (n = 2408): SMD -0.68 (-0.96 to -0.40; P < 0.00001; I <sup>2</sup> =90%) | 10 studies (n = 2685): SMD -0.31 (-0.49 to -0.13; P = 0.0006; I <sup>2</sup> =79%) |
| Adverse events                        | 6 studies (n = 1152): RR 1.17 (1.06 to 1.29; P = 0.002; I <sup>2</sup> =23%)   | 11 studies (n = 2088): RR 1.46 (1.34 to 1.58; P < 0.00001; I <sup>2</sup> =0%)      | 8 studies (n = 1922): RR 1.23 (1.12 to 1.35; P < 0.0001; I <sup>2</sup> =55%)      |
| Serious adverse events                | 3 studies (n = 627): RR 0.59 (0.38 to 0.92; P = 0.02; I <sup>2</sup> =0%)      | 8 studies (n = 2088): RR 0.72 (0.49 to 1.07; P = 0.11; I <sup>2</sup> =0%)          | 7 studies (n = 1674): RR 0.93 (0.55 to 1.59; P = 0.79; I <sup>2</sup> =26%)        |
| Discontinuation due to adverse events | 6 studies (n = 1152): RR 1.22 (0.79 to 1.87; P = 0.37; I <sup>2</sup> =0%)     | 13 studies (n = 2403): RR 1.95 (1.34 to 2.84; P = 0.0005; I <sup>2</sup> =27%)      | 11 studies (n = 3023): RR 1.88 (1.40 to 2.53; P < 0.0001; I <sup>2</sup> =0%)      |

20 Studies that adequately reported randomization and blinding procedures

21 \*Studies duration lasting less than 12 weeks

22 \*\*Studies duration lasting at least 12 weeks

23

24

25

26

27

28

29

30

31

32

33

34

35

36

37

38

39

40

41

42

43

44

45

46



Appendix Table 3: Main results\* of RCTs assessing the benefits and harms of pregabalin in the management of neuropathic pain

| Study ID                                                 | Pain                                                                                                                           |                                                                                             |                                                                                                                | Sleep Disturbance                                                                                                       |                                                                                     | Quality of Life (EQ-5D)                                                                                                                                         | PGIC                                                                                                                                                                                         | CGIC                                                                                    |
|----------------------------------------------------------|--------------------------------------------------------------------------------------------------------------------------------|---------------------------------------------------------------------------------------------|----------------------------------------------------------------------------------------------------------------|-------------------------------------------------------------------------------------------------------------------------|-------------------------------------------------------------------------------------|-----------------------------------------------------------------------------------------------------------------------------------------------------------------|----------------------------------------------------------------------------------------------------------------------------------------------------------------------------------------------|-----------------------------------------------------------------------------------------|
|                                                          | NRS                                                                                                                            | VAS Score                                                                                   | SF-MPQ VAS                                                                                                     | SF-MPQ PPI                                                                                                              | Sleep Interference Scores                                                           |                                                                                                                                                                 |                                                                                                                                                                                              |                                                                                         |
| 10<br>11<br>12<br>13<br>14<br>15<br>16<br>17<br>18<br>19 |                                                                                                                                |                                                                                             | Significantly favoured PGB over PLA (MD -11.06, 95% CI, -18.89 to -3.22; P = 0.006)                            |                                                                                                                         |                                                                                     |                                                                                                                                                                 | Significant improvement with PGB compared to PLA, P= 0.002                                                                                                                                   |                                                                                         |
| 20<br>21<br>22<br>23                                     | Both flexible- and fixed-dose PGB significantly reduced endpoint mean pain score versus PLA (P=0.002 and P<0.001 respectively) |                                                                                             |                                                                                                                |                                                                                                                         | Significantly improved at endpoint in each PGB treatment group over PLA (P<0.001)   | Significantly favoured PGB over PLA (P<0.05)                                                                                                                    | PGIC reported as binary outcome; significantly improved with PGB compared with PLA, P<0.001                                                                                                  | Significant improvement in the PGB arm (P= 0.0294)                                      |
| 24<br>25<br>26                                           |                                                                                                                                |                                                                                             | Significantly improved with PGB vs PLA LSMD -6.56, 95% CI -11.65 to -1.47, P=0.012                             |                                                                                                                         | Significantly improved with PGB vs PLA: LSMD -0.5, 95% CI -0.93 to -0.07, P=0.023   |                                                                                                                                                                 |                                                                                                                                                                                              |                                                                                         |
| 27<br>28<br>29                                           |                                                                                                                                |                                                                                             |                                                                                                                |                                                                                                                         | Significantly improved with PGB vs PLA LSMD -0.55, 95% CI -0.93 to -0.17, P=0.004   |                                                                                                                                                                 |                                                                                                                                                                                              |                                                                                         |
| 30<br>31<br>32                                           | Significant treatment difference favouring PGB over PLA for DPN pain (P=0.034) and DPN pain on walking (P=0.001)               |                                                                                             |                                                                                                                |                                                                                                                         |                                                                                     |                                                                                                                                                                 | Significant improvements with PGB compared to PLA (P=0.002)                                                                                                                                  |                                                                                         |
| 33<br>34<br>35                                           |                                                                                                                                | Significantly improved with PGB compared to PLA: MD -21, 95% CI: -23.8 to -18.2; P = 0.004) |                                                                                                                |                                                                                                                         |                                                                                     |                                                                                                                                                                 |                                                                                                                                                                                              |                                                                                         |
| 36<br>37<br>38<br>39                                     |                                                                                                                                |                                                                                             |                                                                                                                |                                                                                                                         | Significantly favoured PGB over PLA (P<0.05)                                        | Significant improvement with PGB over PLA in sleep quantity (P=0.03), sleep adequacy (P=0.13), snoring (P=0.39), and reduced the sleep problems index (P=0.049) | No significant difference between groups at endpoint, MD 0 (95% CI -0.1, 0.1) P= 0.566                                                                                                       | Significant improvement of in PGB group vs PLA: MD -0.3 (95% CI -0.6, 0) (P=0.049)      |
| 40<br>41                                                 | No significant difference between groups, P values not reported                                                                |                                                                                             |                                                                                                                |                                                                                                                         |                                                                                     |                                                                                                                                                                 |                                                                                                                                                                                              |                                                                                         |
| 42<br>43                                                 |                                                                                                                                |                                                                                             |                                                                                                                |                                                                                                                         | Significantly favoured PGB over PLA (P=0.0001)                                      |                                                                                                                                                                 |                                                                                                                                                                                              |                                                                                         |
| 44<br>45<br>46                                           |                                                                                                                                |                                                                                             | Significant decrease with PGB compared with PLA: MD -8.18, 95% CI: -11.99 to -4.37; P<0.0001)                  | Significant decrease in with PGB compared with PLA: MD -0.37, 95% CI: -0.58 to -0.16; P=0.0007).                        |                                                                                     | Significantly greater improvements with PGB in subscales of sleep disturbance (P=0.0039) and quantity of sleep (P=0.0035) compared with PLA                     | Significantly improved with PGB versus PLA: LSMD -0.49 95% CI -0.72 to -0.27, P<0.0001                                                                                                       | Significant improvement with PGB versus PLA, LSMD -0.62 95% (CI -0.86, -0.39), P<0.0001 |
| 47<br>48<br>49                                           |                                                                                                                                |                                                                                             |                                                                                                                |                                                                                                                         |                                                                                     |                                                                                                                                                                 |                                                                                                                                                                                              |                                                                                         |
| 50<br>51<br>52<br>53                                     |                                                                                                                                |                                                                                             |                                                                                                                |                                                                                                                         | Significantly favoured PGB over PLA: LSMD -0.51 (95% CI, -0.96 to -0.07; P = 0.024) | Significantly greater improvements with PGB in subscales of sleep disturbance (P=0.0034) and quantity of sleep (P=0.018) compared with PLA                      | No significant differences in endpoint scores of EQ-5D utility score least squares means 0.03, 95% CI -0.04, 0.09 P= 0.429, or EQ-5D VAS at endpoint LSMD 3.50 (95% CI -1.18, 8.18) P= 0.142 | No statistically significant difference between groups                                  |
| 54<br>55                                                 |                                                                                                                                |                                                                                             |                                                                                                                |                                                                                                                         | No significant difference between groups: MD 0.11 (95% CI -0.60 to 0.82)            |                                                                                                                                                                 |                                                                                                                                                                                              | No statistically significant difference between groups                                  |
| 56<br>57<br>58<br>59<br>60                               |                                                                                                                                |                                                                                             | Significantly favoured PGB 600mg/day over PLA (MD -14.67, 95% CI, -21.92 to -7.41; P = 0.0002). No significant | Significantly favoured PGB 600mg/day over PLA (MD -0.66, 95% CI, -0.97 to -0.35; P = 0.0002). No significant difference | Significantly favoured PGB over PLA: LSMD -1.152; 95% CI -1.752 to -0.551; P=0.0004 |                                                                                                                                                                 |                                                                                                                                                                                              |                                                                                         |

1  
2  
3  
4  
5  
6  
7  
8  
9  
10  
11  
12  
13  
14  
15  
16  
17  
18  
19  
20  
21  
22  
23  
24  
25  
26  
27  
28  
29  
30  
31  
32  
33  
34  
35  
36  
37  
38  
39  
40  
41  
42  
43  
44  
45  
46  
47  
48  
49  
50  
51  
52  
53  
54  
55  
56  
57  
58  
59  
60

|                   |                                                                                                                                                          |                                                                                                                                                           |                                                                                                                                         |                                                                                   |                                                                                                                                                             |                                                                                                                                                                    |                                                                                                                                                                                        |                                                               |
|-------------------|----------------------------------------------------------------------------------------------------------------------------------------------------------|-----------------------------------------------------------------------------------------------------------------------------------------------------------|-----------------------------------------------------------------------------------------------------------------------------------------|-----------------------------------------------------------------------------------|-------------------------------------------------------------------------------------------------------------------------------------------------------------|--------------------------------------------------------------------------------------------------------------------------------------------------------------------|----------------------------------------------------------------------------------------------------------------------------------------------------------------------------------------|---------------------------------------------------------------|
|                   |                                                                                                                                                          |                                                                                                                                                           | difference between PGB 150mg/day and PLA (MD -4.78, 95% CI, -12.20 to -2.64; P = 0.20)                                                  | between PGB 150 mg/day and PLA (MD -0.17, 95% CI, -0.49 to 0.14; P = 0.28)        |                                                                                                                                                             |                                                                                                                                                                    |                                                                                                                                                                                        |                                                               |
| Rosenstock 2004   |                                                                                                                                                          |                                                                                                                                                           | Significantly favoured PGB over PLA (MD -16.19, 95% CI, -24.52 to -7.86; P = 0.0002)                                                    | Significantly favoured PGB over PLA (MD -0.37, 95% CI, -0.72 to -0.02; P = 0.036) | Significantly favoured PGB over PLA: LSMD -1.54, 95% CI -2.28 to -0.80, P=0.0001                                                                            |                                                                                                                                                                    |                                                                                                                                                                                        |                                                               |
| Sabatowski 2004   |                                                                                                                                                          |                                                                                                                                                           |                                                                                                                                         |                                                                                   | Significantly favoured PGB over PLA: LSMD -1.11, 95% CI -1.71 to -0.51, P=0.0003 for 150 mg/day; LSMD -1.43, 95% CI -2.04 to -0.82, P=0.0001 for 300 mg/day |                                                                                                                                                                    |                                                                                                                                                                                        |                                                               |
| Atoh 2011         |                                                                                                                                                          |                                                                                                                                                           | Significantly favoured PGB 300 mg/day and 600 mg/day over PLA (P < 0.05)                                                                |                                                                                   | Significantly improved in the 300 and 600 mg/day PGB groups compared with PLA (P < 0.0001 and P = 0.0273 respectively)                                      |                                                                                                                                                                    |                                                                                                                                                                                        |                                                               |
| Shabbir 2011      | Significant improvement in pain of DPN was observed in patients receiving PGB (48.1%) and compared to those receiving PLA (10.5%), P values not reported |                                                                                                                                                           |                                                                                                                                         |                                                                                   |                                                                                                                                                             |                                                                                                                                                                    |                                                                                                                                                                                        |                                                               |
| Siddall 2006      |                                                                                                                                                          |                                                                                                                                                           | Significantly favoured PGB over PLA (MD -17.6, 95% CI, -25.2 to -10.0; P<0.001)                                                         | Significantly favoured PGB over PLA (MD -0.66, 95% CI, -0.99 to -0.32; P<0.001)   |                                                                                                                                                             |                                                                                                                                                                    |                                                                                                                                                                                        |                                                               |
| Simpson 2010      |                                                                                                                                                          |                                                                                                                                                           |                                                                                                                                         |                                                                                   |                                                                                                                                                             |                                                                                                                                                                    | Significant self-reported improvement favouring PGB over PLA: 82.8% vs 66.7% (P= 0.008)                                                                                                |                                                               |
| Simpson 2014      |                                                                                                                                                          |                                                                                                                                                           |                                                                                                                                         |                                                                                   | No significant difference between groups: LSMD 0.04, 95% CI 0.43 to 0.35, P =0.840                                                                          |                                                                                                                                                                    | No significant differences between groups: (P=0.505)                                                                                                                                   | No significant differences between groups (P=0.427)           |
| Stacey 2008       |                                                                                                                                                          | Significant improvement in VAS allodynia scores with PGB compared to PLA (flexible-dose: MD -14.4 mm [P<0 .0001] and fixed-dose, MD -8.98 mm [P =0.0075]) | Significant improvement in with PGB compared to PLA (flexible-dose: MD -16.33 mm [P<0 .0001] and fixed-dose, MD -11.97 mm [P =0 .0008]) |                                                                                   | Significant improvements with flexible- and fixed-dose PGB. Results of between-group differences not reported                                               | Fixed or flexible dose PGB demonstrated significant improvement in VAS anxiety scores over PLA (fixed-dose, 19.95, P = 0.025, and flexible-dose, -17.81; P= 0.024) | Patients treated with any PGB treatment regimen were significantly more likely to rate themselves as minimally, much, or very much improved on the PGIC at end point compared with PLA |                                                               |
| Solle 2008        |                                                                                                                                                          |                                                                                                                                                           |                                                                                                                                         |                                                                                   |                                                                                                                                                             | Significant improvements in utility scores for 150, 300, 600mg/day respectively compared to PLA, all P ≤ 0.0263                                                    | Significant improvement with 600 mg/day PGB versus PLA in subjects reporting "improved" or "much improved" (50.5% vs 33.3%, P = 0.02)                                                  | Significant superiority of PGB 600 mg/day over PLA (P= 0.009) |
| San Seventer 2006 |                                                                                                                                                          |                                                                                                                                                           |                                                                                                                                         |                                                                                   | Significant improvement in MOS sleep scale problems with PGB compared with PLA MD - 7.54, 95% CI -11.52 to -3.56, P<0.001                                   |                                                                                                                                                                    | Patients in the 150 mg/day (P = 0.02) and 600 mg/day (P = 0.003) groups were more likely to report global improvement than those in the PLA group                                      |                                                               |
| Van Seventer 2010 |                                                                                                                                                          |                                                                                                                                                           |                                                                                                                                         |                                                                                   |                                                                                                                                                             |                                                                                                                                                                    | Significant improvement in favour of PGB over PLA (P = 0.006)                                                                                                                          |                                                               |
| Vranken 2008      |                                                                                                                                                          | Significant decrease in with PGB compared with PLA: MD 2.18, 95% CI: 0.57 to 3.80; P = 0.01)                                                              |                                                                                                                                         |                                                                                   |                                                                                                                                                             |                                                                                                                                                                    | Statistically significant improvement for both the EQ-5D utility score (p<0.001) and EQ-5D VAS score with PGB compared to PLA (P<0.001)                                                |                                                               |

ABBREVIATIONS: CGIC: Clinician global impression of change; LSMD: Least square mean difference; MD: Mean difference; MOS-Sleep: Medical Outcomes Study Sleep Scale; NRS: numerical rating scale; PGB: Pregabalin; PGIC: Patient global impression of change; PLA: Placebo; SF-MPQ PPI: Short-Form McGill Pain Questionnaire personal pain intensity; SF-MPQ VAS: Short-Form McGill Pain Questionnaire visual assessment scale; VAS: Visual assessment scale

These outcome results have been presented narratively because there was inadequate data to pool results across studies

**Figure S1: Funnel plot for publication bias in RCTs assessing the effect of pregabalin in neuropathic pain.** The broken line represents the mean difference for all trials.

1  
2  
3  
4  
5  
6  
7  
8  
9  
10  
11  
12  
13  
14  
15  
16  
17  
18  
19  
20  
21  
22  
23  
24  
25  
26  
27  
28  
29  
30  
31  
32  
33  
34  
35  
36  
37  
38  
39  
40  
41  
42  
43  
44  
45  
46  
47



**Figure S2: Effect of pregabalin on the risk of weight gain in patients with neuropathic pain**



Figure S3: Effect of pregabalin on the risk of somnolence in patients with neuropathic pain

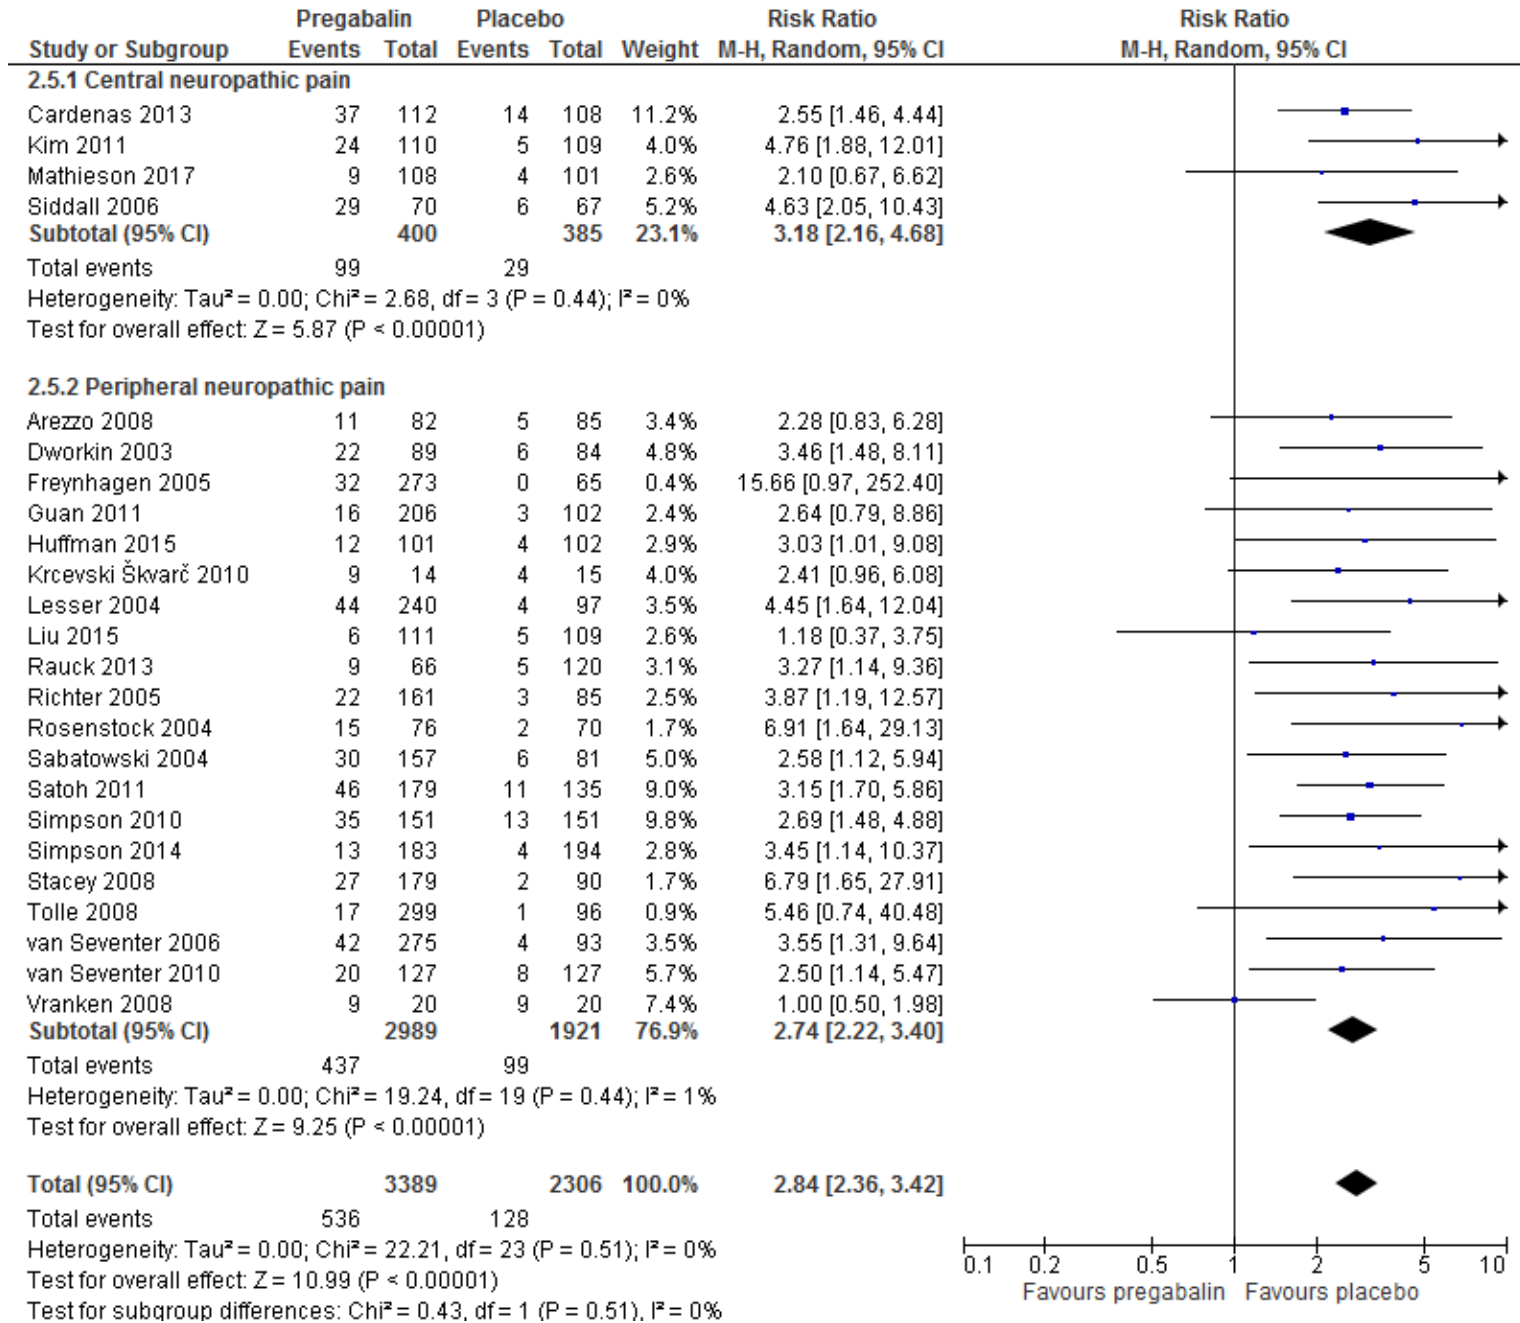

**Figure S4: Effect of pregabalin on the risk of dizziness in patients with neuropathic pain**



Figure S5: Effect of pregabalin on the risk of peripheral edema in patients with neuropathic pain

1  
2  
3  
4  
5  
6  
7  
8  
9  
10  
11  
12  
13  
14  
15  
16  
17  
18  
19  
20  
21  
22  
23  
24  
25  
26  
27  
28  
29  
30  
31  
32  
33  
34  
35  
36  
37  
38  
39  
40  
41  
42  
43  
44  
45  
46  
47



**Figure S6: Effect of pregabalin on the risk of fatigue including asthenia in patients with neuropathic pain**

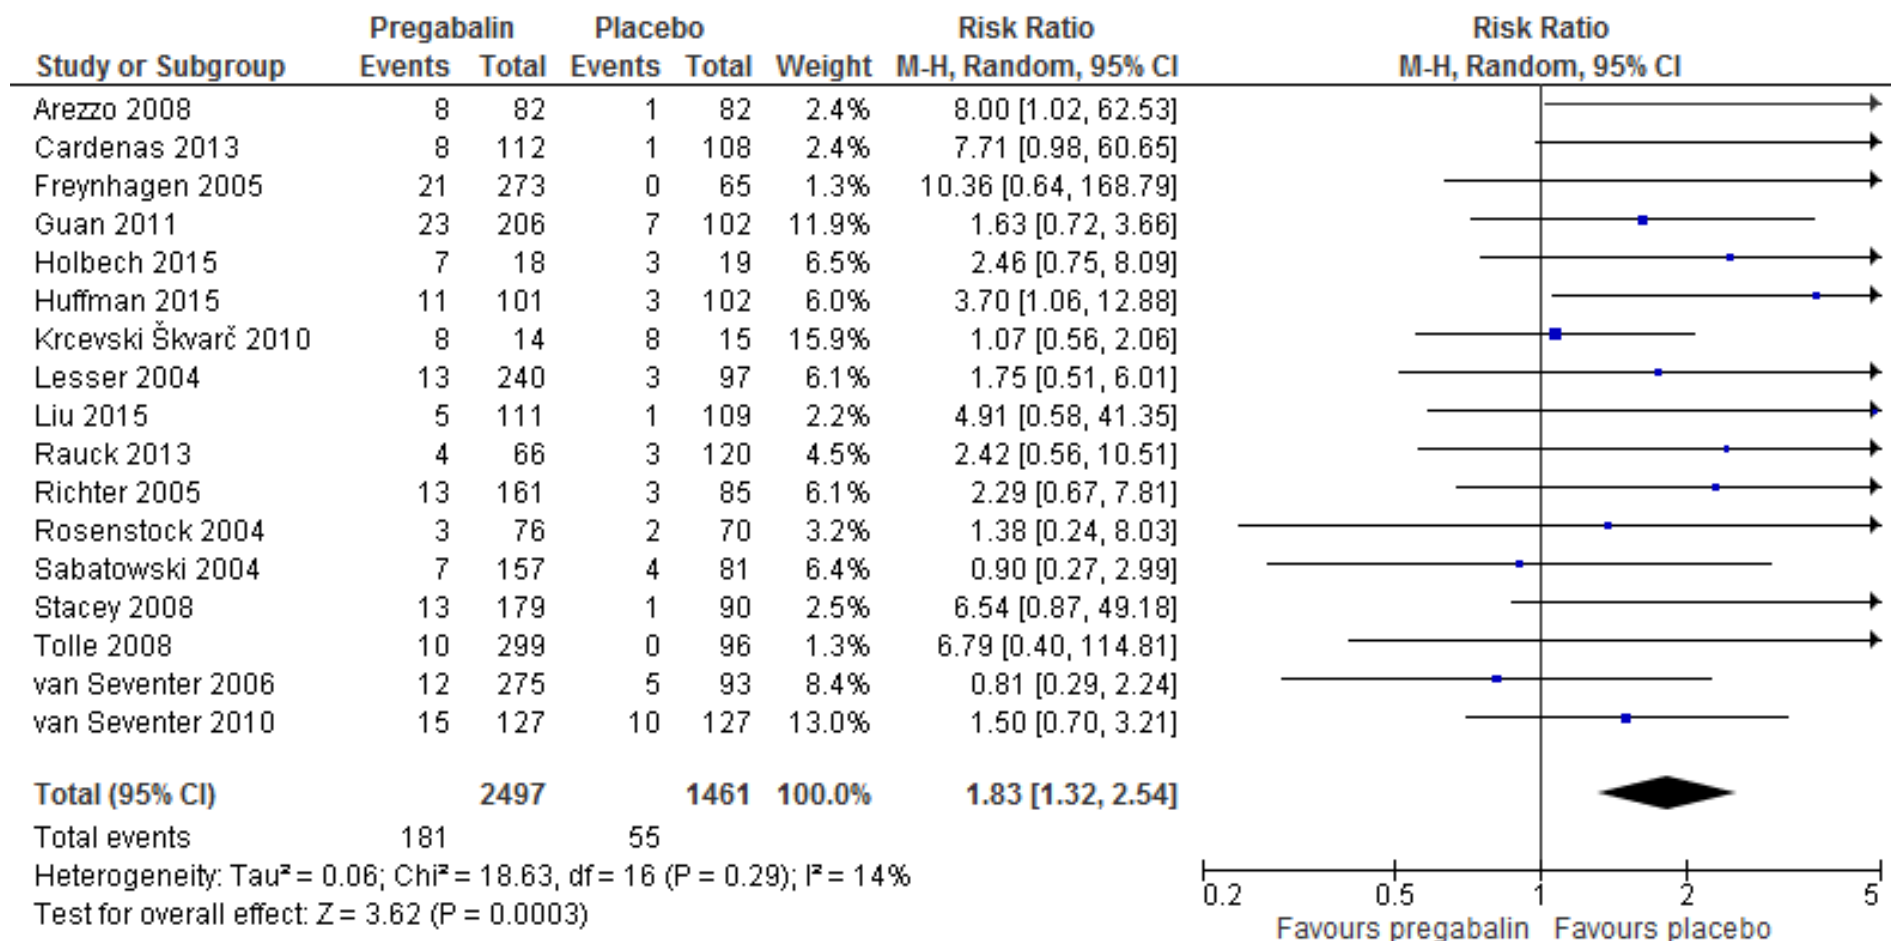



**Figure S7: Effect of pregabalin on the risk of visual disturbances\* in patients with neuropathic pain**

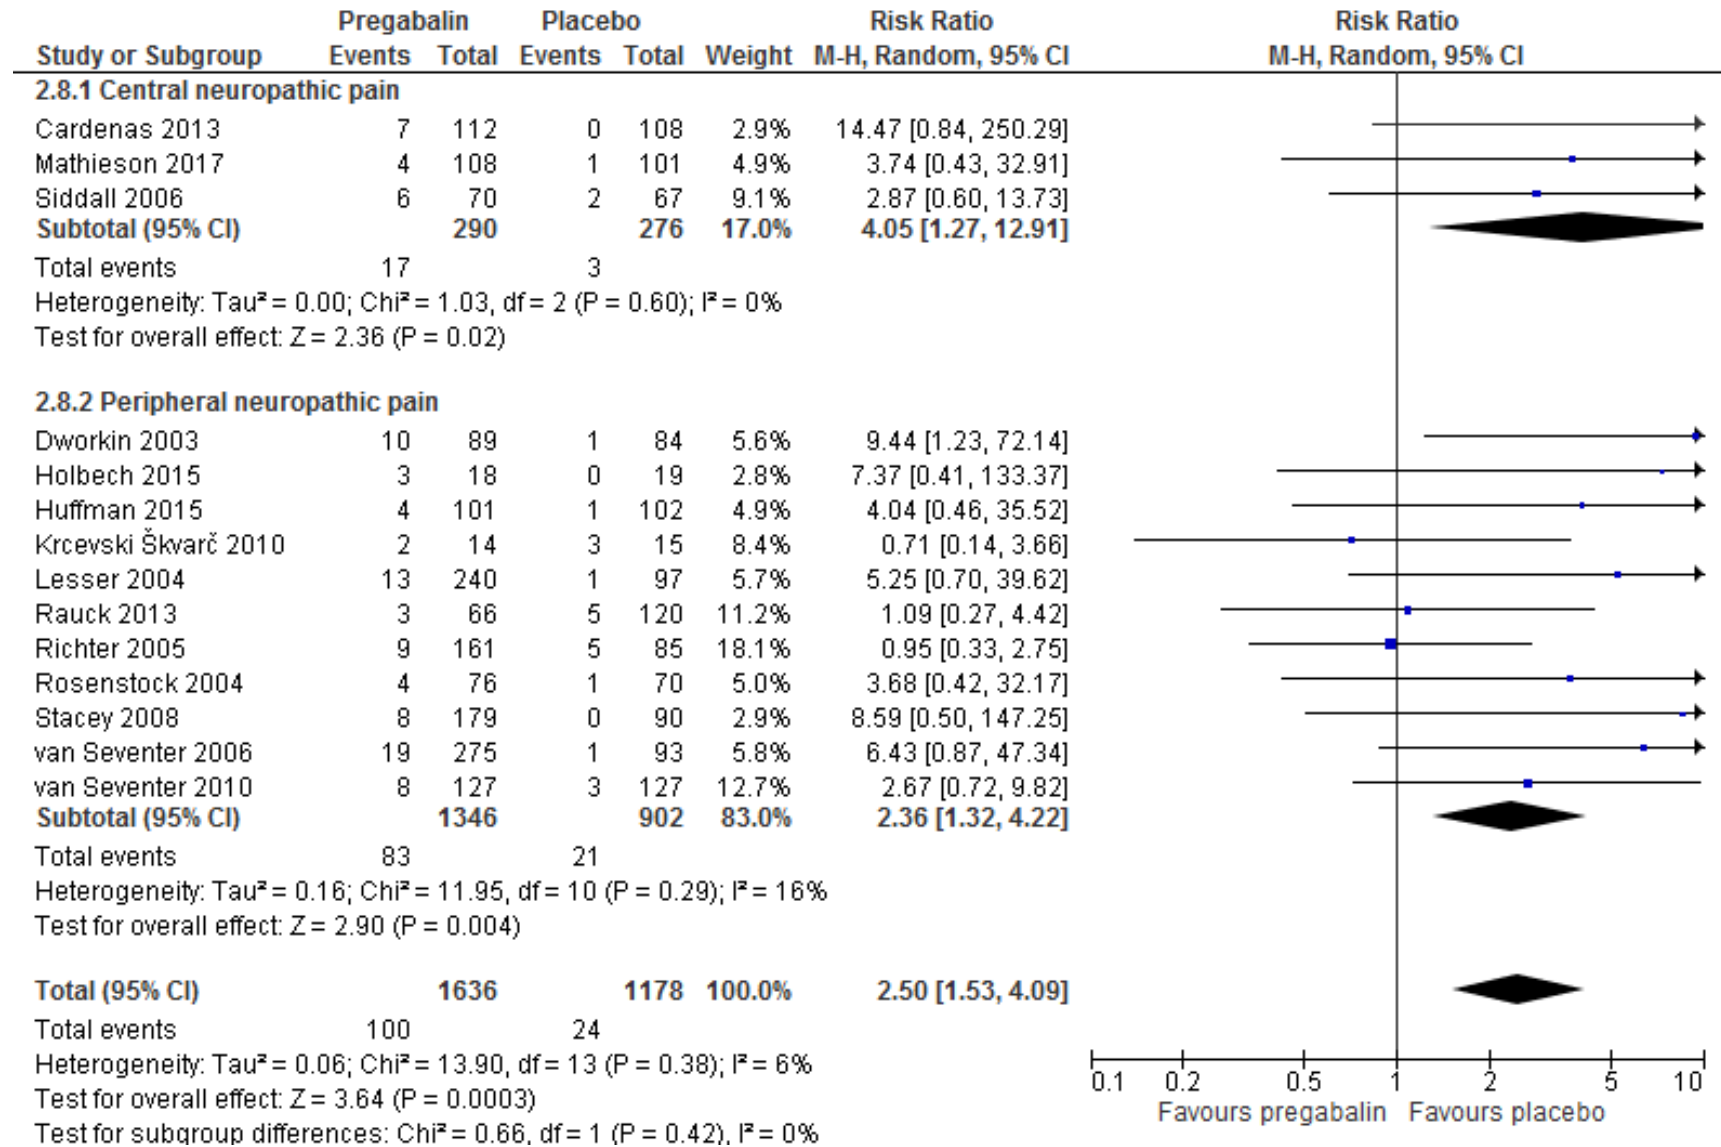

\*includes blurring of vision and amblyopia

**Figure S8: Effect of pregabalin on the risk of ataxia in patients with neuropathic pain**

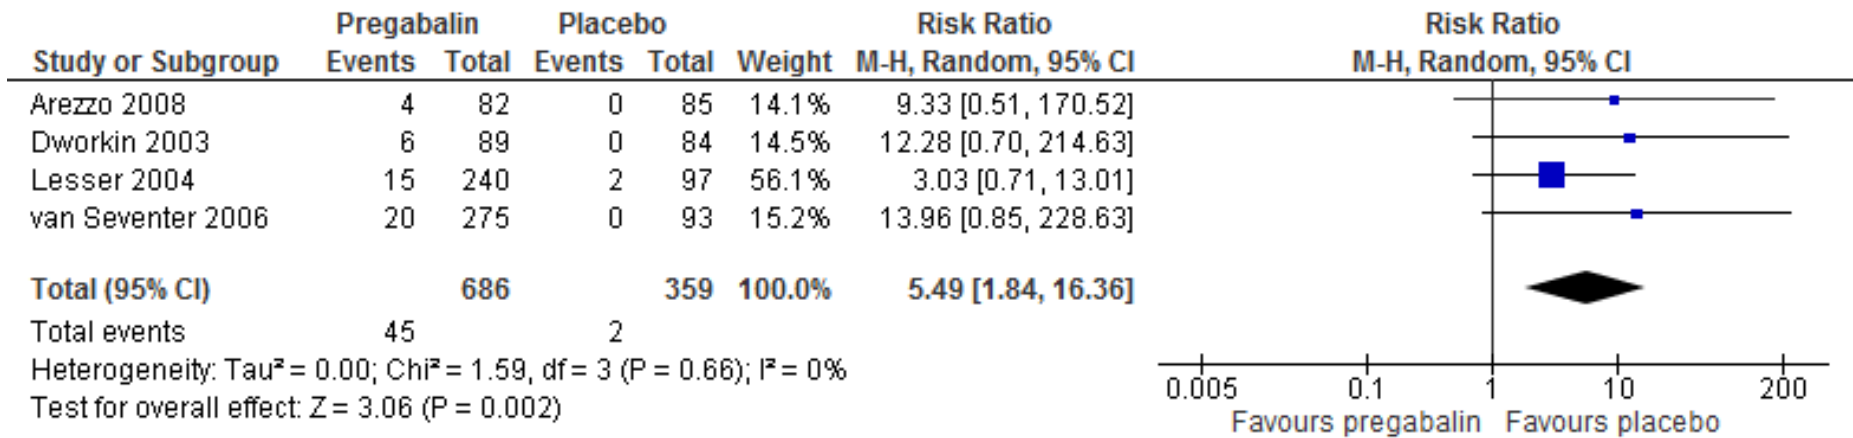

**Figure S9: Effect of pregabalin on the risk of non-peripheral edema in patients with neuropathic pain**



**Figure S10: Effect of pregabalin on the risk of vertigo in patients with neuropathic pain**

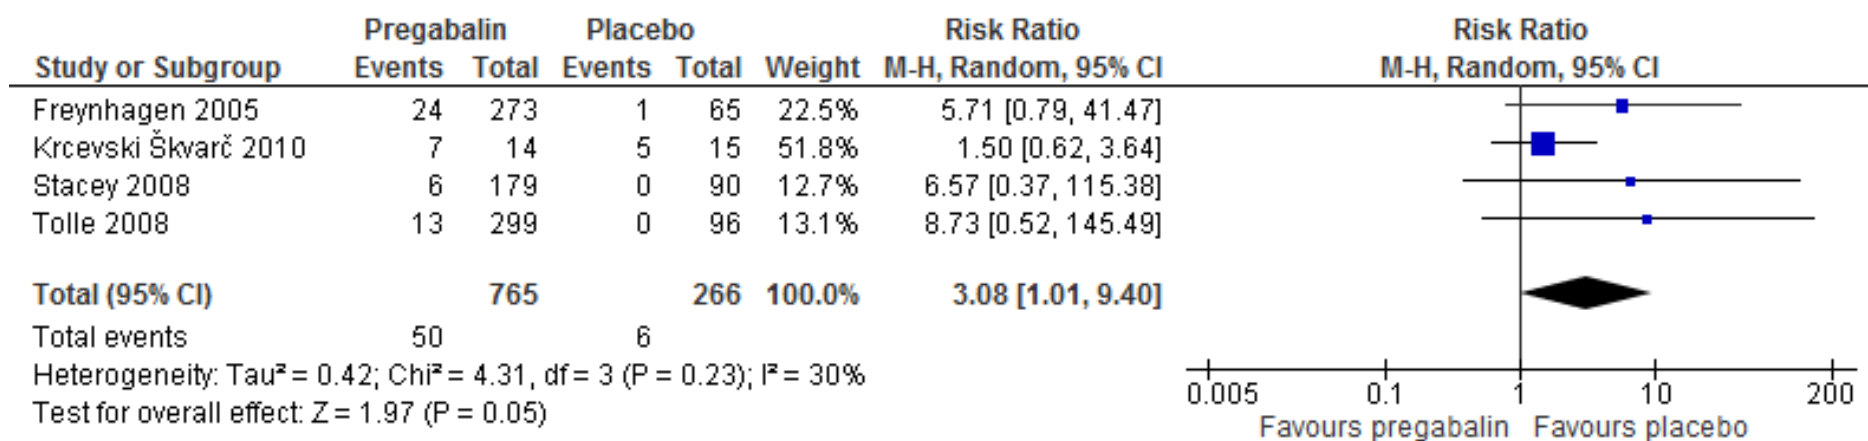

**Figure S11: Effect of pregabalin on the risk of euphoria in patients with neuropathic pain**

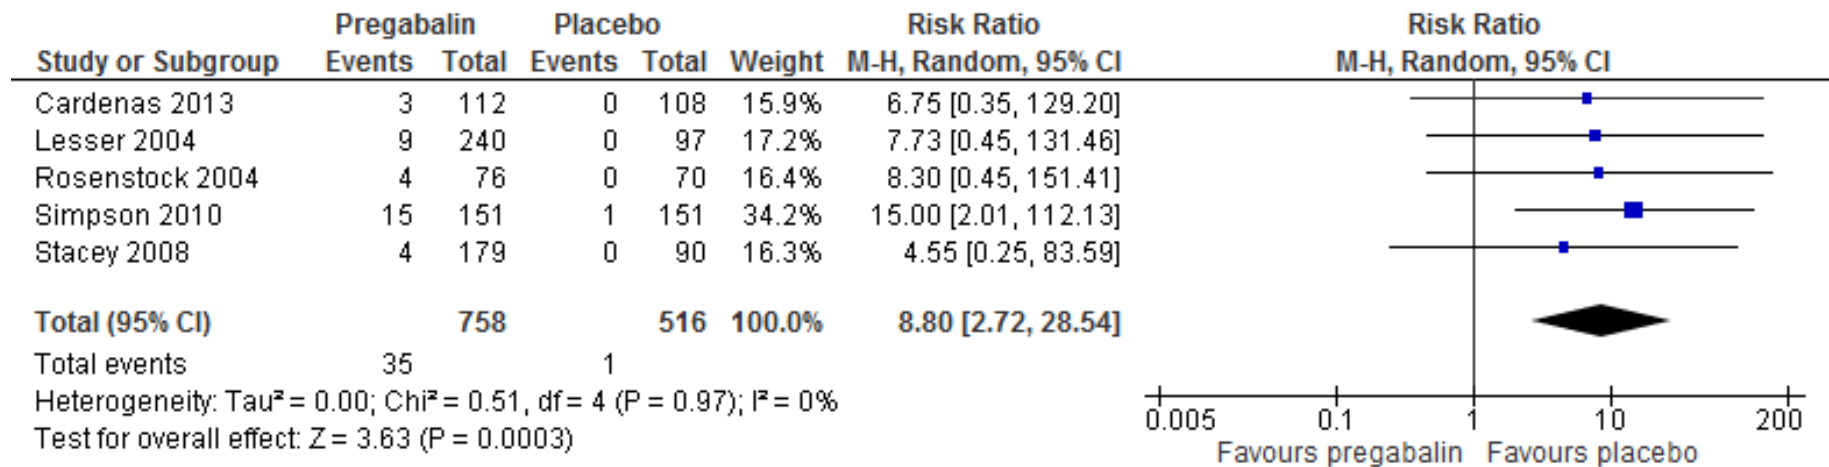

**Figure S12: Effect of pregabalin on the risk of dry mouth in patients with neuropathic pain**



Figure S13: Effect of pregabalin on the risk of discontinuation due to adverse events

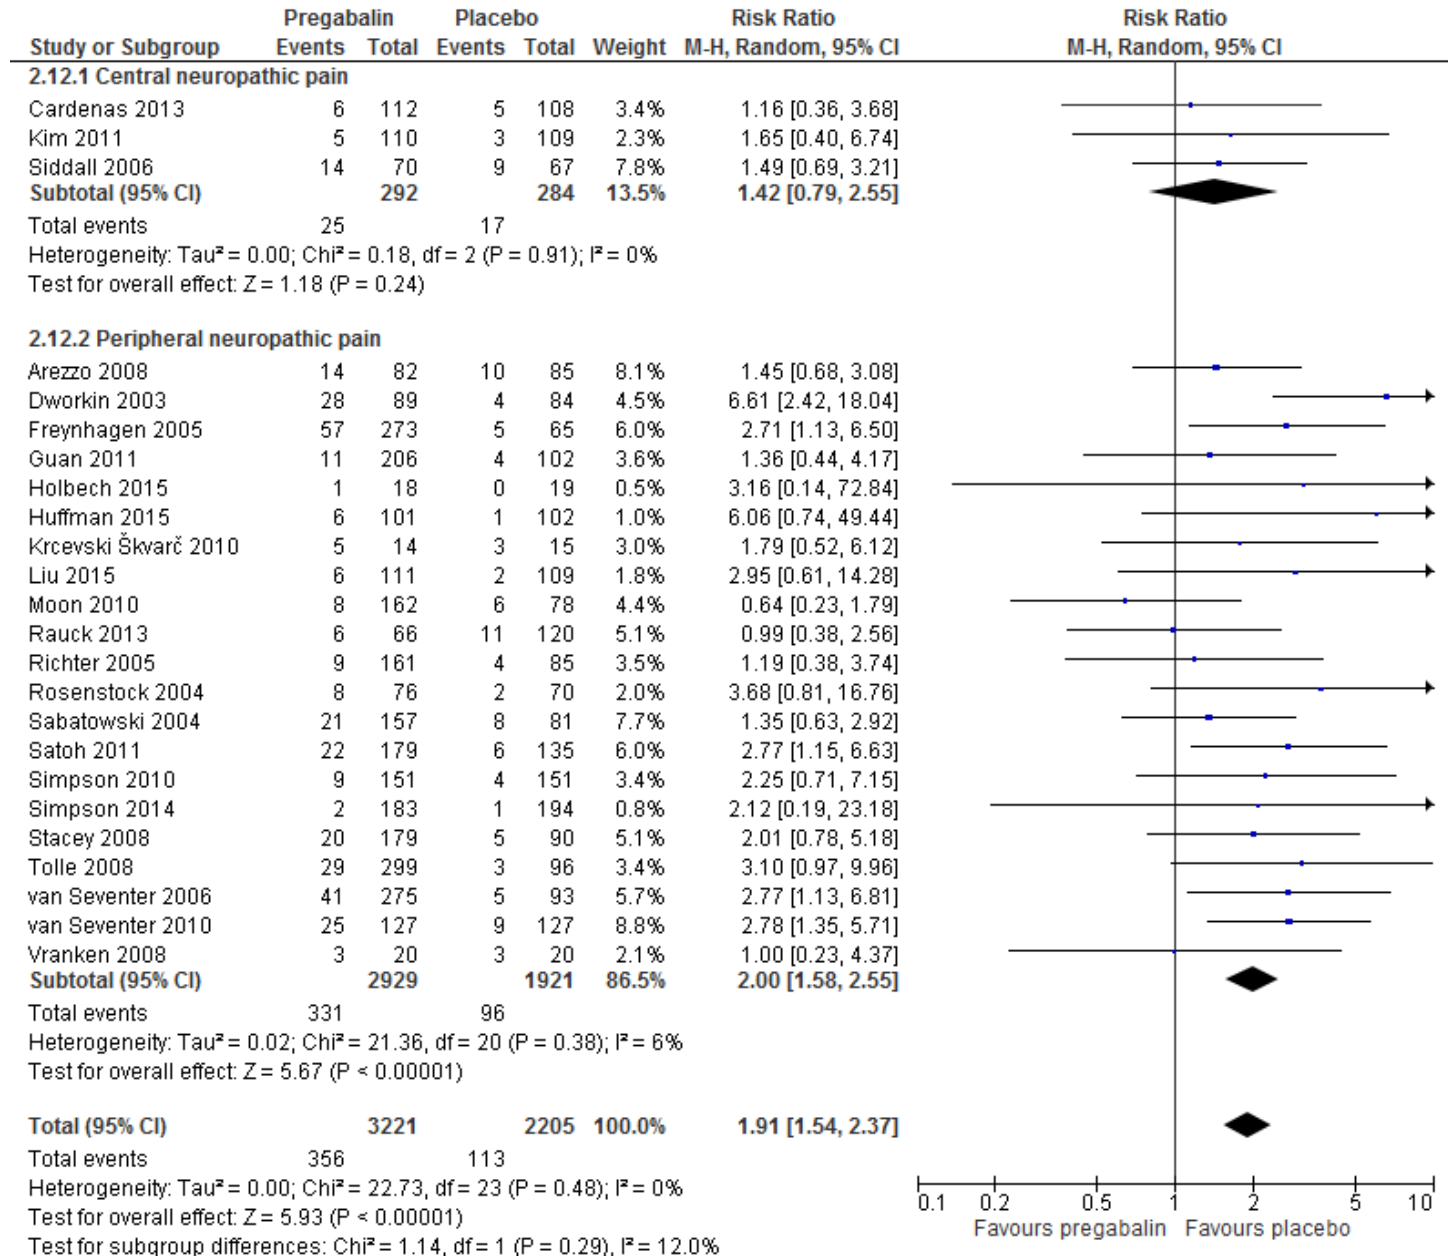

**Figure S14: Effect of pregabalin on the risk of serious adverse events in patients with neuropathic pain**





# Figure S15: Effect of pregabalin on the sleep disturbance in patients with neuropathic pain

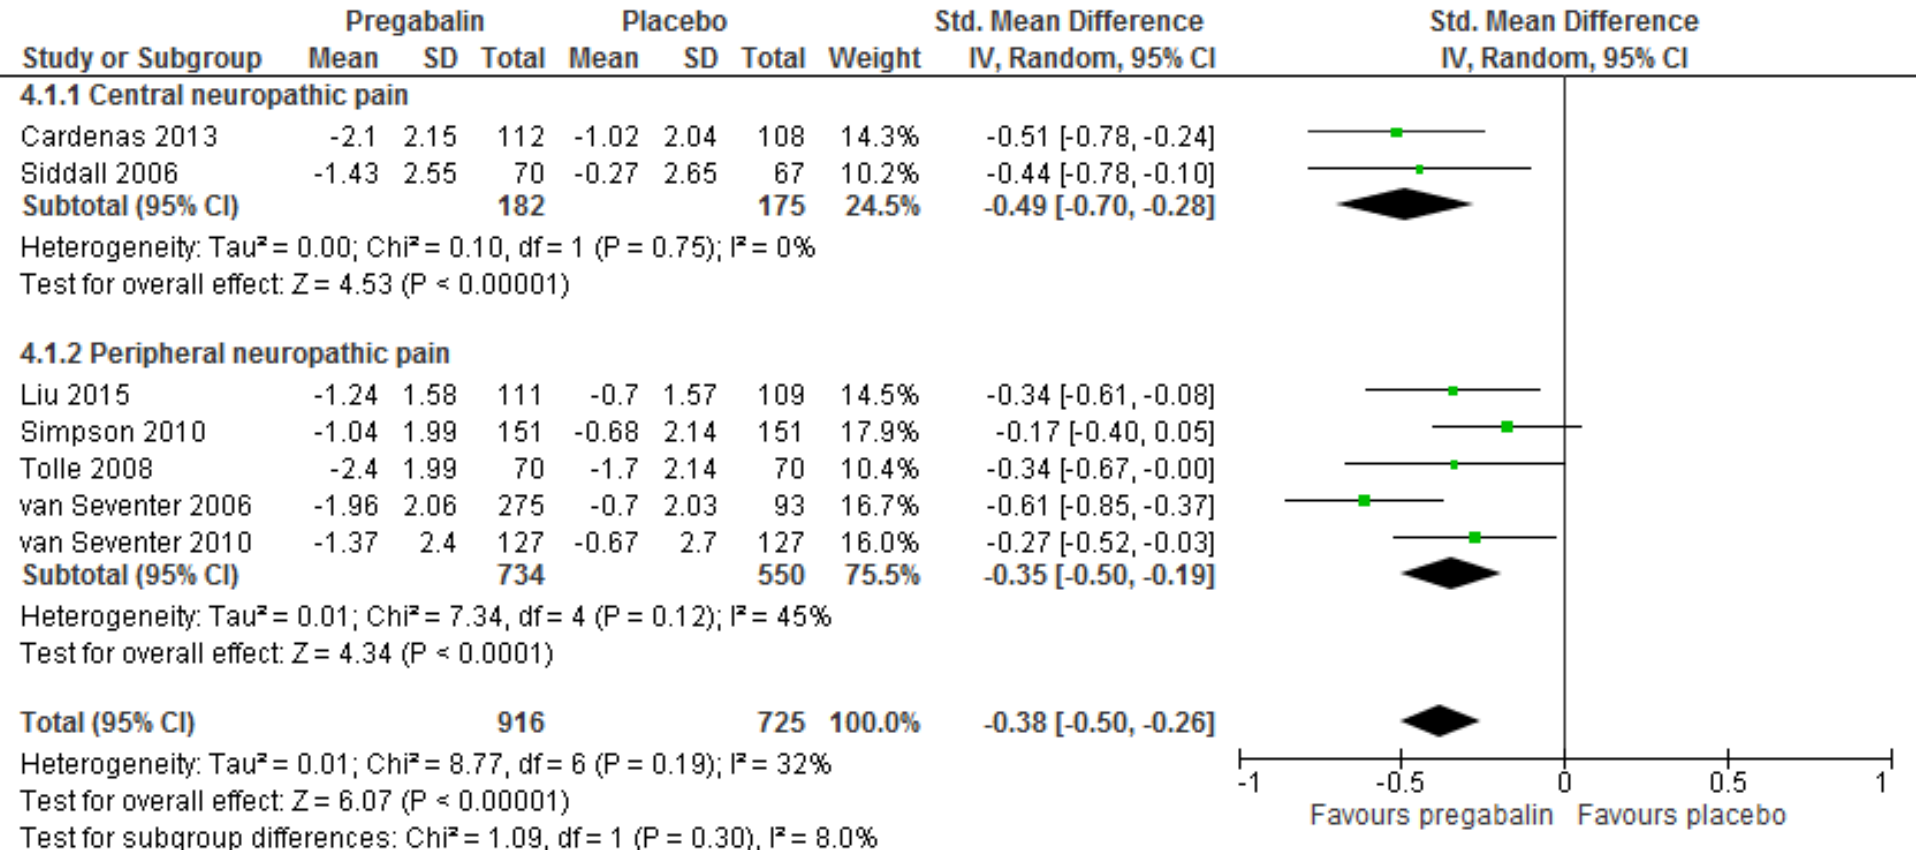

**Figure S16: Effect of pregabalin on HADS-anxiety scores in patients with neuropathic pain**



## Figure S17: Effect of pregabalin on HADS-depression scores in patients with neuropathic pain

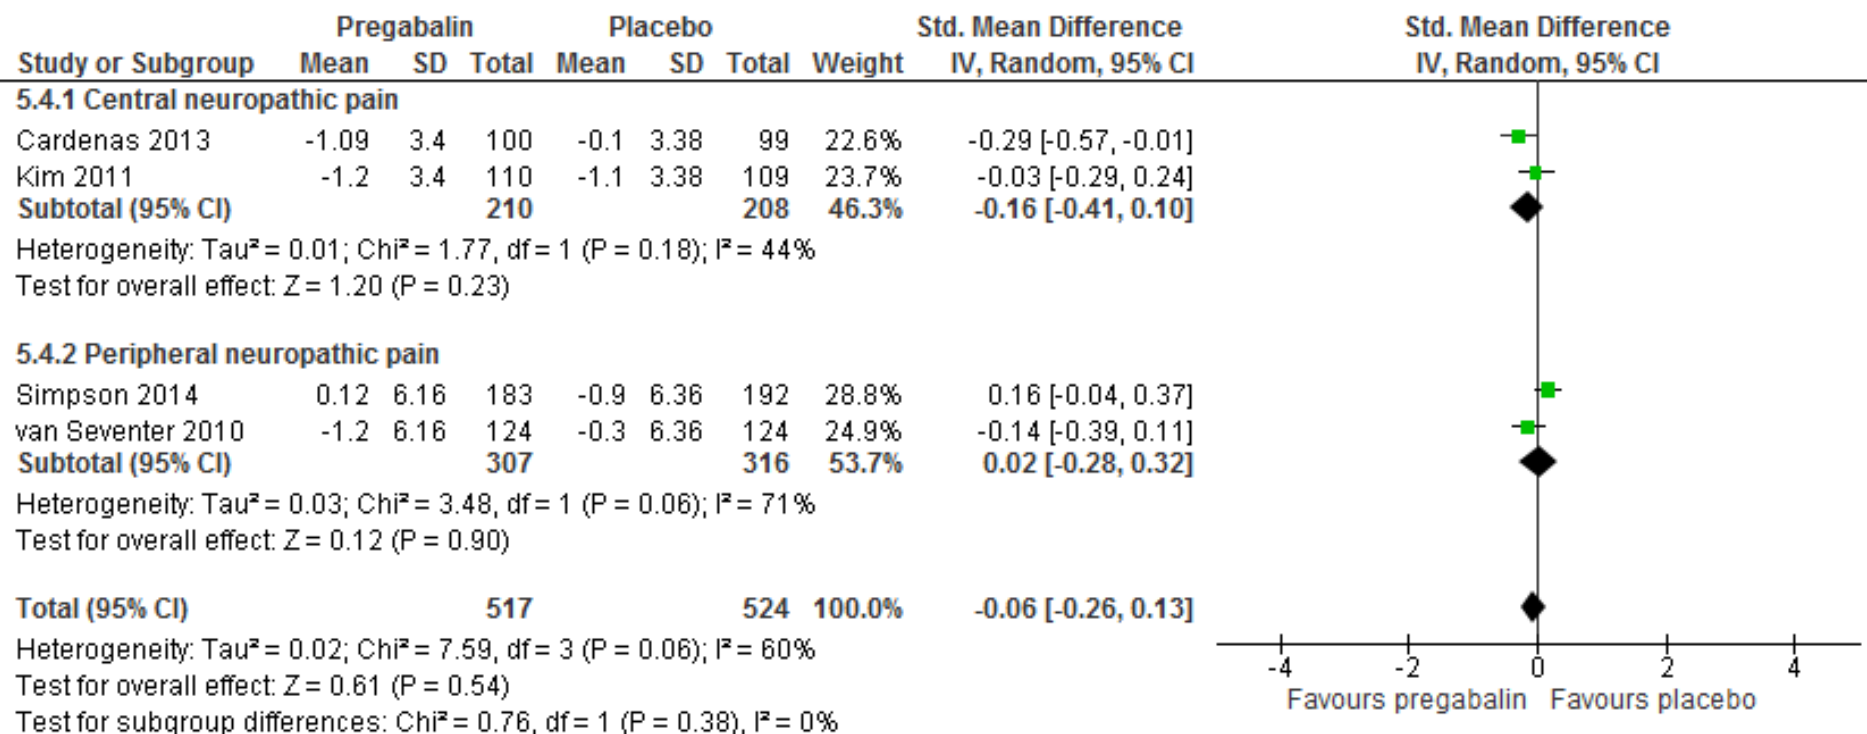

## Appendix 1: Search strategy for identifying RCTs assessing the effects of pregabalin for management of neuropathic pain

### MEDLINE

1. pain.mp. or Pain/
2. pain\*.mp.
3. analgesia/
4. analges\*.mp.
5. neuralgia/
6. 1 or 2 or 3 or 4 or 5
7. pregabalin/
8. clinical trials.mp. or Clinical Trial/
9. randomized clinical trial.mp.
10. controlled clinical trial.mp. or Controlled Clinical Trial/
11. double-blind trial.mp.
12. placebo.ab.
13. ((doubl\$ or tripl\$ or trebl\$) adj5 (blind\$ or mask\$)).ti,ab.
14. 8 or 9 or 10 or 11 or 12 or 13
15. 6 and 7 and 14
16. (animals not (animals and humans)).sh.
17. 15 not 16

### EMBASE

1. pain/ or neuropathic pain/
2. analgesi\*.mp.
3. 1 or 2
4. pregabalin.mp. or pregabalin/
5. controlled clinical trial/ or randomized clinical trial.mp.
6. double blind procedure/

1  
2  
3 7. placebo\*.ab.

4  
5 8. random\*.ab.

6  
7 9. ((doubl\* or trebl\* or tripl\*) adj25 (blind\* or mask\*)).ab.

8  
9 10. 5 or 6 or 7 or 8 or 9

10  
11 11. 3 and 4 and 10

12  
13  
14 **COCHRANE**

15 #1 pain

16 #2 analgesia

17 #3 neuropathic pain

18 #4 neuralgia

19 #5 #1 or #2 or #3 or #4

20 #6 pregabalin

21 #7 lyrica

22 #8 #6 or #7

23 #9 randomized controlled trial.pt

24 #10 controlled controlled trial.pt

25 #11 randomized.ti,ab

26 #12 groups.ti,ab

27 #13 placebo.ti,ab

28 #14 #9 or #10 or #11 or #12 or #13

29 #15 #5 and #8 and #14

30  
31  
32  
33  
34  
35  
36  
37  
38  
39  
40  
41  
42  
43  
44  
45  
46  
47  
48  
49  
50  
51  
52  
53  
54  
55  
56  
57  
58  
59  
60

## Appendix 2: Systematic review protocol

### **Benefits and harms of pregabalin in the management of neuropathic pain: a rapid systematic review and meta-analysis of randomized clinical trials**

Igho J Onakpoya

University of Oxford, Centre for Evidence-Based Medicine, Nuffield Department of Primary Care Health Sciences, Oxford, United Kingdom

Elizabeth T Thomas

Faculty of Health Sciences and Medicine, Bond University, Australia

Joseph Lee

University of Oxford, Centre for Evidence-Based Medicine, Nuffield Department of Primary Care Health Sciences, Oxford, United Kingdom

Ben Goldacre

University of Oxford, Centre for Evidence-Based Medicine, Nuffield Department of Primary Care Health Sciences, Oxford, United Kingdom

Carl J Heneghan

University of Oxford, Centre for Evidence-Based Medicine, Nuffield Department of Primary Care Health Sciences, Oxford, United Kingdom

**Corresponding author:** Igho Onakpoya, University of Oxford, Centre for Evidence-Based Medicine, Nuffield Department of Primary Care Health Sciences, Radcliffe Primary Care Building, Radcliffe Observatory Quarter, Oxford United Kingdom OX2 6GG. Email: [igho.onakpoya@phc.ox.ac.uk](mailto:igho.onakpoya@phc.ox.ac.uk).

## BACKGROUND

Pregabalin is a gabapentinoid licensed for treatment of neurologic disorders. It is one of the earlier drugs approved by the FDA (2004) for the treatment of painful diabetic neuropathy (PDN) and post-herpetic neuralgia (PHN) [1]. Pregabalin is thought to exert its analgesic action through antagonistic activity at the voltage gated Ca<sup>2+</sup> channels where it binds to the alpha-2-delta subunit [1,2].

Prescriptions of pregabalin (and gabapentin) have markedly increased over the last few years. In the US, prescriptions for pregabalin rose from 39 million in 2012 to 64 million in 2016 *versus* (spend increased from approximately \$2 billion to \$4.4 billion over the same period [3]. In the UK, pregabalin use increased 350% over a five year period between 2008 and 2013 [4]. In England alone, there were over 6.2 million prescriptions of pregabalin across GP practices in 2017 costing about \$440 million [5].

There is, however, some evidence of increased mortality attributed pregabalin in the UK [6], and this has led some authors to caution clinicians about the risk of harms when prescribing [7]. The risks are thought to be particularly acute for patients who use heroin and those who misuse gabapentinoids. Indeed, the UK government is soon to classify the drug as a class C controlled substance because of its abuse potential and increased reports of deaths attributed to its use [8]. Practicing clinicians have also recently called for the evidence for the effectiveness of pregabalin to be re-examined in the light of its potential to cause harms [3,4].

## OBJECTIVES

To rapidly evaluate the evidence for benefits and harms of pregabalin in the treatment of neuropathic pain in adults, using evidence from published randomized clinical trials (RCTs).

## METHODS

### Search strategy

We will conduct electronic searches in the following databases:

- Medline;
- Embase; and
- The Cochrane Central Register of Clinical Trials

Each database will be searched from inception till January 2018. No language restrictions will be imposed. We will also hand search the bibliography of eligible studies. Two review authors will independently assess the eligibility of studies for inclusion. Any disagreements were resolved through discussion.

### Types of studies

We will include phase III double-blinded placebo-controlled RCTs assessing the effects of pregabalin on neuropathic pain aged 18 years and above. We will include studies on neuropathic pain based on the definition of the International Association for the Study of Pain (IASP) definition [9]. These include trials on diabetic neuropathy, HIV-related neuropathy, lumbar radiculopathy, post-herpetic neuralgia, and chronic postsurgical pain. We will include RCTs irrespective of study size and duration. If we include RCTs with a cross-over design, we will use data from only the first phase of the study. We will exclude phase IV trials because they are typically unblinded. We will also exclude studies that combine pregabalin with other types of intervention; however, co-interventions will be allowed. Trials that randomized participants based on response to pregabalin therapy in the run-in phase will also be excluded.

### Outcomes

#### *Primary outcomes*

- Pain (as measured using validated scales)



- Adverse events

### *Secondary outcomes*

- Sleep disturbance;
- Quality of life (QOL);
- Patient global impression of change (PGIC);
- Clinician global impression (CGI);
- Overall discontinuations; and
- Discontinuations because of adverse events.

### **Risk of bias assessment**

We will assess the risk of bias for each included study using Cochrane criteria [10] which examines the following domains:

- Method of randomisation;
- Concealment of allocation;
- Blinding of participants and personnel;
- Blinding of outcome assessment;
- Incomplete outcome data;
- Selective reporting;
- Other bias (e.g. industry funding, conflicts of interest, etc).

Two review authors will independently assess the risk of bias. Any disagreements will be resolved through discussion.

### **Data extraction:**

We will use a customized excel spreadsheet to extract relevant data from included studies.

Data to be extracted will include:

- Study ID (first author, publication year, journal, country)

- Participants (numbers, medical condition, demographics, etc.)
- Intervention (type of intervention and duration)
- Results (primary and secondary outcome measures, effect size, adverse events)
- Sources of funding

Five review authors will independently extract the data. Any disagreements were resolved through discussion.

#### **Data analyses:**

We will compute standardized mean differences (SMDs) and 95% confidence intervals (CIs) for continuous outcomes and risk ratios with 95% CI for binary outcomes. We will use the random effects model (Mantel-Haenszel) of the standard meta-analysis software (RevMan 5.3) [11] for meta-analysis. For continuous outcomes, pre- to post-intervention changes will be used to compute the data. When two or more pregabalin arms are present, the arms will be combined to create single pair-wise comparisons [12]. If we are unable to statistically combine the data, the results will be presented in a narrative format. If  $\geq 10$  studies are available for statistical pooling, we will use a funnel plot to test for publication bias. Two review authors will independently enter the data onto RevMan, and will also independently cross-check each other's entry.

#### **Subgroup analysis and investigation of heterogeneity**

We will assess heterogeneity using the I-squared statistic: values of 25%, 50% and 75% will represent mild, moderate and substantial heterogeneity respectively. We will conduct subgroup analyses based on the predominant pathway for neuropathic pain - central or peripheral neuropathic pain. We will conduct sensitivity based on study quality (studies that adequately report randomization and blinding procedures) and intervention duration (shorter or longer duration of therapy). We will visually inspect funnel plots to determine publication bias.

### **Rating the quality of the evidence**

We will use the GRADEpro software (version 3.6) [13] to rate the overall quality of the body of evidence for each outcome based on the Grading of Recommendation, Assessment, Development, and Evaluation (GRADE) [14] criteria which examines the following domains:

- Study design;
- Risk of bias;
- Inconsistency;
- Indirectness; and
- Imprecision.

The overall quality of the body of the evidence will rated from high to very low as follows:

- High - Further research is very unlikely to change our confidence in the estimate of effect
- Moderate - Further research is likely to have an important impact on our confidence in the estimate of effect and may change the estimate
- Low - Further research is very likely to have an important impact on our confidence in the estimate of effect and is likely to change the estimate
- Very low - We are very uncertain about the estimate

We will use Summary of findings (SOF) tables to present these results.

### **Patient public involvement**

Because this is a rapid review, we will not enlist the services of patient representatives.

### **Sources of funding**

None

### **Conflicts of interest**

None

## REFERENCES

- 1 Verma V, Singh N, Singh Jaggi A. Pregabalin in neuropathic pain: evidences and possible mechanisms. *Curr Neuropharmacol*. 2014 Jan;12(1):44-56.
- 2 Taylor CP, Angelotti T, Fauman E. Pharmacology and mechanism of action of pregabalin: the calcium channel alpha2-delta (alpha2-delta) subunit as a target for antiepileptic drug discovery. *Epilepsy Res*. 2007 Feb;73(2):137-50
- 3 Goodman CW, Brett AS. Gabapentin and Pregabalin for Pain - Is Increased Prescribing a Cause for Concern? *N Engl J Med*. 2017 Aug 3;377(5):411-414.
- 4 Spence D. Bad medicine: gabapentin and pregabalin. *BMJ*. 2013 Nov 8;347:f6747. doi: 10.1136/bmj.f6747.
- 5 OpenPrescribing.net. High-level prescribing trends for Pregabalin (BNF code 0408010AE) across all GP practices in NHS England, since August 2010. Available at: <https://openprescribing.net/chemical/0408010AE/> [Last accessed 8th March, 2018]
- 6 Lyndon A, Audrey S, Wells C, Burnell ES, Ingle S, Hill R, Hickman M, Henderson G. Risk to heroin users of polydrug use of pregabalin or gabapentin. *Addiction*. 2017 Sep;112(9):1580-1589
- 7 Morrison EE, Sandilands EA, Webb DJ. Gabapentin and pregabalin: do the benefits outweigh the harms? *J R Coll Physicians Edinb* 2017; 47: 310–3
- 8 Iacobucci G. UK government to reclassify pregabalin and gabapentin after rise in deaths. *BMJ*. 2017 Sep 25;358:j4441. doi: 10.1136/bmj.j4441.
- 9 International Association for the Study of Pain. What is neuropathic pain? <https://s3.amazonaws.com/rdcms-iasp/files/production/public/AM/Images/GYAP/What%20is%20Neuropathic%20Pain.pdf> [Accessed 19th January, 2018]

- 
- 1  
2  
3  
4 10 Higgins JP, Altman DG, Gøtzsche PC, . The Cochrane Collaboration's tool for assessing  
5 risk of bias in randomised trials. Br Med J 2011; 343: d5928–d5928  
6  
7  
8 11 Review Manager (RevMan) (Computer program). Version 5.3. Copenhagen: The Nordic  
9 Cochrane Centre, The Cochrane Collaboration, 2011  
10  
11  
12 12 Cochrane Handbook of Systematic Reviews. How to include multiple groups from one  
13 study. Chapter 16 (Section 5.4).  
14  
15 [http://handbook.cochrane.org/chapter\\_16/16\\_5\\_4\\_how\\_to\\_include\\_multiple\\_groups\\_from](http://handbook.cochrane.org/chapter_16/16_5_4_how_to_include_multiple_groups_from_one_study.htm)  
16  
17 [one\\_study.htm](http://handbook.cochrane.org/chapter_16/16_5_4_how_to_include_multiple_groups_from_one_study.htm) [Accessed 20 June 2016]  
18  
19  
20  
21 13 GRADEpro. Computer program on www.gradepr.org. Version 3.6. McMaster  
22 University, 2014.  
23  
24  
25 14 GRADE Working Group. Grading quality of evidence and strength of recommendations.  
26 BMJ 2004; 328(7454): 1490.  
27  
28  
29  
30  
31  
32  
33  
34  
35  
36  
37  
38  
39  
40  
41  
42  
43  
44  
45  
46  
47  
48  
49  
50  
51  
52  
53  
54  
55  
56  
57  
58  
59  
60

1  
2  
3 **Appendix 3: List of excluded studies and reasons for exclusion**  
4

5

| Study ID            | Reference                                                                                                                                                                                                                                                                                                                                                                                                                   | Reason for exclusion                                                                 |
|---------------------|-----------------------------------------------------------------------------------------------------------------------------------------------------------------------------------------------------------------------------------------------------------------------------------------------------------------------------------------------------------------------------------------------------------------------------|--------------------------------------------------------------------------------------|
| 6<br>7 Al-Hihi 2017 | 8 Al-Hihi E, Badgett RG. In moderate-to-severe sciatica, pregabalin did not reduce leg<br>9 pain intensity or improve quality of life. <i>Annals of internal medicine</i> . 2017; (2):[Jc4 p.].<br>10 Available from: <a href="http://onlinelibrary.wiley.com/o/cochrane/clcentral/articles/558/CN-01394558/frame.html">http://onlinelibrary.wiley.com/o/cochrane/clcentral/articles/558/CN-01394558/frame.html</a> .<br>11 | 12 Not primary report of RCT                                                         |
| 13<br>14 Anon 2010  | 15 Anonymous. Pregabalin effective in relieving post-traumatic peripheral neuropathic pain.<br>16 <i>Australian Journal of Pharmacy</i> . 2010;91 (1086):82.                                                                                                                                                                                                                                                                | 17 Not primary report of RCT                                                         |
| 18<br>19 Baron 2008 | 20 Baron R, Brunnmuller U, Brassler M, May M, Binder A. Efficacy and safety of<br>21 pregabalin in patients with diabetic peripheral neuropathy or postherpetic neuralgia:<br>22 Open-label, non-comparative, flexible-dose study. <i>European Journal of Pain</i> .<br>23 2008;12(7):850-8.                                                                                                                                | 24 Open label; also no placebo control                                               |
| 25<br>26 Baron 2010 | 27 Baron R, Freynhagen R, Tolle TR, Cloutier C, Leon T, Murphy TK, et al. The efficacy<br>28 and safety of pregabalin in the treatment of neuropathic pain associated with chronic<br>29 lumbosacral radiculopathy. <i>Pain</i> . 2010;150 (3):420-7.                                                                                                                                                                       | 30 Randomization based on response to interventions in run-in phase                  |
| 31<br>32 Boyle 2012 | 33 Boyle J, Eriksson MEV, Gribble L, Gouni R, Johnsen S, Coppini DV, et al.<br>34 Randomized, placebo-controlled comparison of amitriptyline, duloxetine, and pregabalin<br>35 in patients with chronic diabetic peripheral neuropathic pain: Impact on pain,<br>36 polysomnographic sleep, daytime functioning, and quality of life. <i>Diabetes care</i> . 2012;35<br>37 (12):2451-8.<br>38                               | 39 No placebo control; only placebo run in<br>40<br>41<br>42<br>43<br>44<br>45<br>46 |

1  
2  
3  
4  
5  
6  
7  
8  
9  
10  
11  
12  
13  
14  
15  
16  
17  
18  
19  
20  
21  
22  
23  
24  
25  
26  
27  
28  
29  
30  
31  
32  
33  
34  
35  
36  
37  
38  
39  
40  
41  
42  
43  
44  
45  
46

|                 |                                                                                                                                                                                                                                                                                                                                                                                                                                                      |                                                                               |
|-----------------|------------------------------------------------------------------------------------------------------------------------------------------------------------------------------------------------------------------------------------------------------------------------------------------------------------------------------------------------------------------------------------------------------------------------------------------------------|-------------------------------------------------------------------------------|
| Calkins 2014    | Calkins A, Shurman J, Jaros M, Kim R, Shang G. Peripheral edema and weight gain in adult patients with painful diabetic peripheral neuropathy (DPN) receiving gabapentin enacarbil (GEN) or pregabalin enrolled in a randomized phase 2 trial. Neurology Conference: 66th American Academy of Neurology Annual Meeting, AAN. 2014;82(10 SUPPL. 1).                                                                                                   | Did not report neuropathic pain as an outcome                                 |
| Cardenas 2012   | Cardenas D, Nieshoff E, Suda K, Goto S, Kaneko T, Parsons B, et al. A 17-week, randomized, double-blind, placebo-controlled, parallel-group, multi-center trial of pregabalin for the treatment of chronic central neuropathic pain after spinal cord injury. Journal of pain. 2012;Conference: 31st Annual Scientific Meeting of the American Pain Society. Honolulu, HI United States. Conference Publication: (var.pagings). 13 (4 SUPPL. 1):S62. | Duplicate of study already included in the review: Duplicate of Cardenas 2013 |
| Cardenas 2013   | Cardenas DD, Nieshoff E, Parsons B, Sanin L, Kaneko T, Suzuki M, et al. Assessment of neuropathic pain during a 17-week, double-blind, placebo-controlled, trial of pregabalin in patients with spinal cord injury. Regional Anesthesia and Pain Medicine Conference: 11th Annual ASRA Pain Medicine Meeting Miami, FL United States Conference Publication:. 2013;38(1).                                                                            | Duplicate of study already included in the review: Duplicate of Cardenas 2013 |
| De Andrade 2015 | De Andrade DC, Teixeira MJ, Galhardoni R, Ferreira KASL, Malieno PB, Scisci N, et al. A phase III, randomized, double-blind, placebo-controlled trial to evaluate the efficacy and safety of pregabalin in the prevention and reduction of oxaliplatin-induced painful neuropathy (PreOx). Journal of Clinical Oncology Conference. 2015;33(15 SUPPL. 1).                                                                                            | Pain experienced during cancer chemotherapy                                   |

|                                                                |                      |                                                                                                                                                                                                                                                                                                                                                                                        |                                                                                            |
|----------------------------------------------------------------|----------------------|----------------------------------------------------------------------------------------------------------------------------------------------------------------------------------------------------------------------------------------------------------------------------------------------------------------------------------------------------------------------------------------|--------------------------------------------------------------------------------------------|
| 1<br>2<br>3                                                    | Duarte 2014          | Duarte MAG, Cardenas-Soto K, Lem M, Castillo C, Gibbons C, Freeman R. Efficacy of pregabalin in the treatment of prediabetic neuropathic pain. Neurology Conference: 66th American Academy of Neurology Annual Meeting, AAN. 2014;82(10 SUPPL. 1).                                                                                                                                     | No placebo control; evaluation in open-label run-in                                        |
| 4<br>5<br>6<br>7<br>8<br>9                                     | Eerdekens 2016       | Eerdekens M, Koch ED, Kok M, Sohns M, Forst T. Cebranopadol, a novel first-in-class analgesic: Efficacy, safety, tolerability in patients with pain due to diabetic peripheral neuropathy (U). Pain practice. 2016;Conference: 8th World Congress of the World Institute of Pain, WIP 2016. New York City, NY United States. Conference Publication: (var.pagings). 16 (SUPPL. 1):100. | Unclear how many participants were in each intervention arm                                |
| 10<br>11<br>12<br>13<br>14<br>15<br>16<br>17<br>18             | Freynhagen 2006      | Freynhagen R, Busche P, Konrad C, Balkenohl M. [Effectiveness and time to onset of pregabalin in patients with neuropathic pain]. Der Schmerz. 2006;20(4):285-8.                                                                                                                                                                                                                       | Non-English study: Duplicate of Freynhagen 2005                                            |
| 19<br>20<br>21<br>22<br>23<br>24<br>25<br>26<br>27<br>28<br>29 | Gabrani 2016         | Gabrani A, Dobi D, Tomori S, Berberi F, Como A, Kapisyzi MR. Efectiveness of pregabalin compared with amytriptilin in acute Herpetic Neuralgia. Neurology Conference: 68th American Academy of Neurology Annual Meeting, AAN. 2016;86(16 SUPPL. 1).                                                                                                                                    | Not a placebo-controlled study                                                             |
| 30<br>31<br>32<br>33<br>34                                     | Gilron 2011          | Gilron I, Wajsbrodt D, Therrien F, Lemay J. Pregabalin for peripheral neuropathic pain: a multicenter, enriched enrollment randomized withdrawal placebo-controlled trial. Clinical journal of pain. 2011;27(3):185-93.                                                                                                                                                                | Single-blinded Randomization to placebo/PGB occurred after a run in period of pre-gabalin? |
| 35<br>36<br>37<br>38<br>39<br>40                               | Gonzalez-Duarte 2016 | Gonzalez-Duarte A, Lem M, Diaz-Diaz E, Castillo C, Cardenas-Soto K. The Efficacy of Pregabalin in the Treatment of Prediabetic Neuropathic Pain. Clinical journal of pain. 2016;32(11):927-32.                                                                                                                                                                                         | Randomization based on response to interventions in run-in phase                           |



1  
2  
3  
4  
5  
6  
7  
8  
9  
10  
11  
12  
13  
14  
15  
16  
17  
18  
19  
20  
21  
22  
23  
24  
25  
26  
27  
28  
29  
30  
31  
32  
33  
34  
35  
36  
37  
38  
39  
40  
41  
42  
43  
44  
45  
46

Jenkins 2010

Jenkins T, Smart T, Hackman F, Cooke C, Tan K, Cheung R. Pregabalin in post-traumatic peripheral neuropathic pain: Efficient assessment of efficacy in a randomised, double-blind, placebo-controlled crossover study. *European Journal of Pain Supplements*. 2010;Conference: 3rd International Congress on Neuropathic Pain. Athens Greece. Conference Publication: (var.pagings). 4 (1):89.

Duplicate of study already excluded from the review: Jenkins 2012

Jenkins 2012

Jenkins TM, Smart TS, Hackman F, Cooke C, Tan KKC. Efficient assessment of efficacy in post-traumatic peripheral neuropathic pain patients: Pregabalin in a randomized, placebo-controlled, crossover study. *Journal of pain research*. 2012;5:243-50.

Phase I: proof of concept

Jensen-Dahm 2011

Jensen-Dahm C, Rowbotham MC, Reda H, Petersen KL. Effect of a single dose of pregabalin on herpes zoster pain. *Trials [Electronic Resource]*. 2011;12(55):28.

Phase 2

Kruszewski 2007

Kruszewski SP, Shane JA. Pregabalin in central neuropathic pain associated with spinal cord injury: a placebo-controlled trial. *Neurology*. 2007;68(24):2158-9.

Not primary report of RCT

Mishra 2012

Mishra S, Bhatnagar S, Goyal GN, Rana SPS, Upadhyaya SP. A comparative efficacy of amitriptyline, gabapentin, and pregabalin in neuropathic cancer pain: a prospective randomized double-blind placebo-controlled study. *American Journal of Hospice & Palliative Medicine*. 2012;29(3):177-82.

Pain experienced during cancer chemotherapy

|    |               |                                                                                                                                                                                                                                                                                                                                                                                                                                      |                                                                                    |
|----|---------------|--------------------------------------------------------------------------------------------------------------------------------------------------------------------------------------------------------------------------------------------------------------------------------------------------------------------------------------------------------------------------------------------------------------------------------------|------------------------------------------------------------------------------------|
| 1  |               |                                                                                                                                                                                                                                                                                                                                                                                                                                      |                                                                                    |
| 2  |               |                                                                                                                                                                                                                                                                                                                                                                                                                                      |                                                                                    |
| 3  | Morrison 2015 | Morrison S, Parson H, Vinik AI. Pregabalin positively affects subjective pain, falls risk, and gait in persons with diabetic peripheral neuropathy. <i>Diabetes</i> . 2015;Conference: 75th Scientific Sessions of the American Diabetes Association. Boston, MA United States. Conference Publication: (var.pagings). 64 (SUPPL. 1):A164.                                                                                           | Cross-over trial that did not report data from first phase                         |
| 4  |               |                                                                                                                                                                                                                                                                                                                                                                                                                                      |                                                                                    |
| 5  |               |                                                                                                                                                                                                                                                                                                                                                                                                                                      |                                                                                    |
| 6  |               |                                                                                                                                                                                                                                                                                                                                                                                                                                      |                                                                                    |
| 7  |               |                                                                                                                                                                                                                                                                                                                                                                                                                                      |                                                                                    |
| 8  |               |                                                                                                                                                                                                                                                                                                                                                                                                                                      |                                                                                    |
| 9  |               |                                                                                                                                                                                                                                                                                                                                                                                                                                      |                                                                                    |
| 10 |               |                                                                                                                                                                                                                                                                                                                                                                                                                                      |                                                                                    |
| 11 |               |                                                                                                                                                                                                                                                                                                                                                                                                                                      |                                                                                    |
| 12 | Parsons 2013  | Parsons B, Emir B. Examining the time-to-improvement of pain in patients with chronic neuropathic pain due to spinal cord injury. <i>Journal of pain</i> . 2013;Conference: 32nd Annual Scientific Meeting of the American Pain Society. New Orleans, LA United States. Conference Publication: (var.pagings). 14 (4 SUPPL. 1):S60.                                                                                                  | Not primary report of RCT: report of 2 separate primary studies included in review |
| 13 |               |                                                                                                                                                                                                                                                                                                                                                                                                                                      |                                                                                    |
| 14 |               |                                                                                                                                                                                                                                                                                                                                                                                                                                      |                                                                                    |
| 15 |               |                                                                                                                                                                                                                                                                                                                                                                                                                                      |                                                                                    |
| 16 |               |                                                                                                                                                                                                                                                                                                                                                                                                                                      |                                                                                    |
| 17 |               |                                                                                                                                                                                                                                                                                                                                                                                                                                      |                                                                                    |
| 18 |               |                                                                                                                                                                                                                                                                                                                                                                                                                                      |                                                                                    |
| 19 | Parsons 2015  | Parsons B, Emir B, Knapp L. Examining the Time to Improvement of Sleep Interference With Pregabalin in Patients With Painful Diabetic Peripheral Neuropathy and Postherpetic Neuralgia. <i>American journal of therapeutics</i> . 2015;22(4):257-68.                                                                                                                                                                                 | Not primary report of RCT                                                          |
| 20 |               |                                                                                                                                                                                                                                                                                                                                                                                                                                      |                                                                                    |
| 21 |               |                                                                                                                                                                                                                                                                                                                                                                                                                                      |                                                                                    |
| 22 |               |                                                                                                                                                                                                                                                                                                                                                                                                                                      |                                                                                    |
| 23 |               |                                                                                                                                                                                                                                                                                                                                                                                                                                      |                                                                                    |
| 24 |               |                                                                                                                                                                                                                                                                                                                                                                                                                                      |                                                                                    |
| 25 |               |                                                                                                                                                                                                                                                                                                                                                                                                                                      |                                                                                    |
| 26 | Parsons 2012  | Parsons B, Nieshoff E, Cardenas D, Sanin L, Kaneko T, Suzuki M, et al. Weekly assessments of pain and sleep during a 17-week, double-blind, placebo-controlled trial of pregabalin for the treatment of chronic neuropathic pain after spinal cord injury. <i>Neurology</i> . 2012;Conference: 64th American Academy of Neurology Annual Meeting. New Orleans, LA United States. Conference Publication: (var.pagings). 79 (11):e88. | Duplicate of study already included in the review: Duplicate of Cardenas 2013      |
| 27 |               |                                                                                                                                                                                                                                                                                                                                                                                                                                      |                                                                                    |
| 28 |               |                                                                                                                                                                                                                                                                                                                                                                                                                                      |                                                                                    |
| 29 |               |                                                                                                                                                                                                                                                                                                                                                                                                                                      |                                                                                    |
| 30 |               |                                                                                                                                                                                                                                                                                                                                                                                                                                      |                                                                                    |
| 31 |               |                                                                                                                                                                                                                                                                                                                                                                                                                                      |                                                                                    |
| 32 |               |                                                                                                                                                                                                                                                                                                                                                                                                                                      |                                                                                    |
| 33 |               |                                                                                                                                                                                                                                                                                                                                                                                                                                      |                                                                                    |
| 34 |               |                                                                                                                                                                                                                                                                                                                                                                                                                                      |                                                                                    |
| 35 |               |                                                                                                                                                                                                                                                                                                                                                                                                                                      |                                                                                    |
| 36 |               |                                                                                                                                                                                                                                                                                                                                                                                                                                      |                                                                                    |
| 37 |               |                                                                                                                                                                                                                                                                                                                                                                                                                                      |                                                                                    |
| 38 |               |                                                                                                                                                                                                                                                                                                                                                                                                                                      |                                                                                    |
| 39 |               |                                                                                                                                                                                                                                                                                                                                                                                                                                      |                                                                                    |
| 40 |               |                                                                                                                                                                                                                                                                                                                                                                                                                                      |                                                                                    |
| 41 |               |                                                                                                                                                                                                                                                                                                                                                                                                                                      |                                                                                    |
| 42 |               |                                                                                                                                                                                                                                                                                                                                                                                                                                      |                                                                                    |
| 43 |               |                                                                                                                                                                                                                                                                                                                                                                                                                                      |                                                                                    |
| 44 |               |                                                                                                                                                                                                                                                                                                                                                                                                                                      |                                                                                    |
| 45 |               |                                                                                                                                                                                                                                                                                                                                                                                                                                      |                                                                                    |
| 46 |               |                                                                                                                                                                                                                                                                                                                                                                                                                                      |                                                                                    |

1  
2  
3  
4  
5  
6  
7  
8  
9  
10  
11  
12  
13  
14  
15  
16  
17  
18  
19  
20  
21  
22  
23  
24  
25  
26  
27  
28  
29  
30  
31  
32  
33  
34  
35  
36  
37  
38  
39  
40  
41  
42  
43  
44  
45  
46

|                         |                                                                                                                                                                                                                                                                                                                                  |                                                                          |
|-------------------------|----------------------------------------------------------------------------------------------------------------------------------------------------------------------------------------------------------------------------------------------------------------------------------------------------------------------------------|--------------------------------------------------------------------------|
| Parsons 2015 (Ann Neur) | Parsons B, Shang N, Yan P, Fan D. Efficacy and safety of pregabalin for postherpetic neuralgia in Chinese patients. <i>Annals of Neurology</i> . 2015;Conference: 140th Annual Meeting of the American Neurological Association, ANA 2015. Chicago, IL United States. Conference Publication: (var.pagings). 78 (SUPPL. 19):S92. | Duplicate of study already included in the review: Duplicate of Liu 2015 |
| Puiu 2015               | Puiu T, Kairys A, Pauer L, Schmidt-Wilcke T, Ichesco E, Hampson J, et al. Alterations in brain gray matter volume are associated with reduced evoked-pain connectivity following acute pregabalin administration. <i>Neurology Conference: 67th American Academy of Neurology Annual Meeting, AAN</i> . 2015;84(SUPPL. 14).      | Included participants with fibromyalgia                                  |
| Raskin 2014             | Raskin P, Huffman C, Toth C, Asmus MJ, Messig M, Sanchez RJ, et al. Pregabalin in patients with inadequately treated painful diabetic peripheral neuropathy: a randomized withdrawal trial. <i>Clinical journal of pain</i> . 2014;30(5):379-90.                                                                                 | Randomization based on response to interventions in run-in phase         |
| Satoh 2011              | Satoh J, Yagihashi S, Baba M, Suzuki M, Arakawa A, Yoshiyama T. Efficacy and safety evaluation of pregabalin treatment over 52weeks in patients with diabetic neuropathic pain extended after a double-blind placebo-controlled trial. <i>Journal of diabetes investigation</i> . 2011;2 (6):457-63.                             | Open label; also no placebo control                                      |

|                                                                                                                |                   |                                                                                                                                                                                                                                                                                                                                                               |                                                                      |
|----------------------------------------------------------------------------------------------------------------|-------------------|---------------------------------------------------------------------------------------------------------------------------------------------------------------------------------------------------------------------------------------------------------------------------------------------------------------------------------------------------------------|----------------------------------------------------------------------|
| 1<br>2<br>3<br>4<br>5<br>6<br>7<br>8<br>9<br>10<br>11                                                          | van Seventer 2009 | Van Seventer R, Murphy K, Temple J, McKenzie I, Serpell M, Toth C, et al. Pregabalin is effective in the treatment of posttraumatic peripheral neuropathic pain. Journal of pain. 2009;Conference: 28th Annual Scientific Meeting of the American Pain Society, APS. San Diego, CA United States. Conference Publication: (var.pagings). 10 (4 SUPPL. 1):S35. | Duplicate of study already included in the review: Van Seventer 2010 |
| 12<br>13<br>14<br>15<br>16<br>17<br>18                                                                         | Vinik 2014- 1     | Vinik A, Rosenstock J, Sharma U, Feins K, Hsu C, Merante D. Efficacy and safety of mirogabalin (DS-5565) for the treatment of diabetic peripheral neuropathic pain: A randomized, double-blind, placebo- and active comparator-controlled, adaptive proof-of-concept phase 2 study. Diabetes care. 2014;37 (12):3253-61.                                      | Proof of concept study                                               |
| 19<br>20<br>21<br>22<br>23<br>24<br>25<br>26<br>27                                                             | Vinik 2014-2      | Vinik A, Sharma U, Feins K, Hsu C, Merante D. Central nervous system safety and tolerability of DS-5565: A randomized, double-blind, placebo-and active comparator-controlled phase II study in diabetic peripheral neuropathic pain. Neurology Conference: 66th American Academy of Neurology Annual Meeting, AAN. 2014;82(10 SUPPL. 1).                     | Duplicate of study already excluded from the review (Vinik 2014-1)   |
| 28<br>29<br>30<br>31<br>32<br>33<br>34<br>35<br>36<br>37<br>38<br>39<br>40<br>41<br>42<br>43<br>44<br>45<br>46 | Vinik 2014-3      | Vinik A, Sharma U, Feins K, Hsu C, Merante D. DS-5565 for the treatment of diabetic peripheral neuropathic pain: Randomized, double-blind, placebo-and active comparator-controlled phase ii study. Neurology Conference: 66th American Academy of Neurology Annual Meeting, AAN. 2014;82(10 SUPPL. 1).                                                       | Duplicate of study already excluded from the review (Vinik 2014-1)   |

1  
2  
3  
4  
5  
6  
7  
8  
9  
10  
11  
12  
13  
14  
15  
16  
17  
18  
19  
20  
21  
22  
23  
24  
25  
26  
27  
28  
29  
30  
31  
32  
33  
34  
35  
36  
37  
38  
39  
40  
41  
42  
43  
44  
45  
46

|              |                                                                                                                                                                                                                                                                                                                                                                                                                     |                                                                    |
|--------------|---------------------------------------------------------------------------------------------------------------------------------------------------------------------------------------------------------------------------------------------------------------------------------------------------------------------------------------------------------------------------------------------------------------------|--------------------------------------------------------------------|
| Vinik 2014-4 | <p>Vinik AI, Sharma U, Feins K, Hsu C, Merante D. Safety/tolerability profile of DS-5565: A new potent, specific alpha2-delta ligand for the treatment of diabetic peripheral neuropathic pain. Diabetes. 2014;Conference: 74th Scientific Sessions of the American Diabetes Association. San Francisco, CA United States. Conference Publication: (var.pagings). 63 (SUPPL. 1):A298.</p>                           | Duplicate of study already excluded from the review (Vinik 2014-1) |
| Vinik 2014-5 | <p>Vinik AI, Sharma U, Feins K, Hsu C, Merante D. A randomized, double-blind, placebo- and active comparator (pregabalin)-controlled phase II study of DS-5565 for the treatment of diabetic peripheral neuropathic pain. Diabetes. 2014;Conference: 74th Scientific Sessions of the American Diabetes Association. San Francisco, CA United States. Conference Publication: (var.pagings). 63 (SUPPL. 1):A294.</p> | Duplicate of study already excluded from the review (Vinik 2014-1) |

## Appendix 4: Risk of bias judgements for included studies

### Arezzo 2008

#### Risk of bias table

| Bias                                                      | Authors' judgement | Support for judgement                                                                                                                                                                                                                            |
|-----------------------------------------------------------|--------------------|--------------------------------------------------------------------------------------------------------------------------------------------------------------------------------------------------------------------------------------------------|
| Random sequence generation (selection bias)               | Low risk           | Computer-generated random code                                                                                                                                                                                                                   |
| Allocation concealment (selection bias)                   | Low risk           | Number-coded study medications to the study sites were assigned using an interactive voice-response system                                                                                                                                       |
| Blinding of participants and personnel (performance bias) | Low risk           | Blinding was maintained by dispensing pregabalin and placebo in identical capsules                                                                                                                                                               |
| Blinding of outcome assessment (detection bias)           | Low risk           | The sponsor, members of the study site, and the patients were unaware of the treatment assignment                                                                                                                                                |
| Incomplete outcome data (attrition bias)                  | Unclear risk       | Reasons for attrition reported; however, drop-out rates were 34.1% for pregabalin and 28.1% for placebo                                                                                                                                          |
| Selective reporting (reporting bias)                      | Unclear risk       | Outcomes reported as specified in methods. BOCF results also reported for pain scores. However, MD and SD for baseline and end-points were not reported separately, and some outcomes were reported at other time points other than at 13 weeks. |
| Other bias                                                | High risk          | All investigators had financial ties to the sponsor                                                                                                                                                                                              |

1  
2  
3 **Cardenas 2013**  
4

5 **Risk of bias table**  
6

| Bias                                                      | Authors' judgement | Support for judgement                                                                                                                                                                                     |
|-----------------------------------------------------------|--------------------|-----------------------------------------------------------------------------------------------------------------------------------------------------------------------------------------------------------|
| Random sequence generation (selection bias)               | Low risk           | Computer-generated sequence                                                                                                                                                                               |
| Allocation concealment (selection bias)                   | Low risk           | Interactive response technology system (via phone or internet) provided a unique identification number for each patient                                                                                   |
| Blinding of participants and personnel (performance bias) | Low risk           | Both placebo and pregabalin were in the form of gray capsules                                                                                                                                             |
| Blinding of outcome assessment (detection bias)           | Low risk           | Treatment allocation was concealed from patient and investigator                                                                                                                                          |
| Incomplete outcome data (attrition bias)                  | Unclear risk       | Acceptable dropout 15.7% placebo, 17% PGB. Reasons for dropout explained. ITT analysis (and modified ITT analysis) performed                                                                              |
| Selective reporting (reporting bias)                      | High risk          | Following pre-specified outcomes from protocol not reported in study: Modified Brief Pain Inventory Interference Scale; Quantitative Assessment of Neuropathic Pain (QANeP) 6 outcomes; NPSI (9 outcomes) |
| Other bias                                                | High risk          | All the investigators had financial ties to the study sponsor                                                                                                                                             |

**Dworkin 2003****Risk of bias table**

| Bias                                                      | Authors' judgement | Support for judgement                                                                                                                                                                                                                                             |
|-----------------------------------------------------------|--------------------|-------------------------------------------------------------------------------------------------------------------------------------------------------------------------------------------------------------------------------------------------------------------|
| Random sequence generation (selection bias)               | Unclear risk       | Sequential randomization schedule generated with block size of four. Unclear how this schedule was generated                                                                                                                                                      |
| Allocation concealment (selection bias)                   | Low risk           | Study medication was packaged and labeled with sequential randomization numbers                                                                                                                                                                                   |
| Blinding of participants and personnel (performance bias) | Unclear risk       | Placebo capsules were identical in appearance to pregabalin; however also states that blinding could have been broken in emergency situations                                                                                                                     |
| Blinding of outcome assessment (detection bias)           | Low risk           | Blind maintained until after the study was completed and all decisions regarding data evaluability had been made                                                                                                                                                  |
| Incomplete outcome data (attrition bias)                  | Unclear risk       | Uneven numbers of drop outs- PGB 35%, placebo 12%. Reasons provided- mostly due to adverse events                                                                                                                                                                 |
| Selective reporting (reporting bias)                      | Unclear risk       | 29 patients had possibly important variations from the protocol and details of this are specified. Secondary outcome of CGIC- mentioned in results that clinicians assessments of global change closely paralleled patients' assessments however no figures given |
| Other bias                                                | High risk          | All the investigators had financial ties to the study sponsor                                                                                                                                                                                                     |



**Freyenhagen 2005**

**Risk of bias table**

| Bias                                                      | Authors' judgement | Support for judgement                                                                                                                                         |
|-----------------------------------------------------------|--------------------|---------------------------------------------------------------------------------------------------------------------------------------------------------------|
| Random sequence generation (selection bias)               | Unclear risk       | Insufficient information                                                                                                                                      |
| Allocation concealment (selection bias)                   | Unclear risk       | Insufficient information                                                                                                                                      |
| Blinding of participants and personnel (performance bias) | Unclear risk       | All patients received active medication or matching placebo capsules. Double blinded. However, unclear whether they were identical in appearance and taste    |
| Blinding of outcome assessment (detection bias)           | Unclear risk       | Insufficient information                                                                                                                                      |
| Incomplete outcome data (attrition bias)                  | High risk          | High rates of dropout: PGB flexible dose 35%, PGB fixed dose 38%, 46%. Reasons provided (mostly due to adverse events for PGB, lack of efficacy for Placebo). |
| Selective reporting (reporting bias)                      | Low risk           | Outcomes specified in methods match those found in results.                                                                                                   |
| Other bias                                                | High risk          | All study investigators had financial ties to the study sponsor                                                                                               |

1  
2  
3 **Guan 2011**  
4

5 **Risk of bias table**  
6  
7

| Bias                                                      | Authors' judgement | Support for judgement                                                                                                                                                                                                                         |
|-----------------------------------------------------------|--------------------|-----------------------------------------------------------------------------------------------------------------------------------------------------------------------------------------------------------------------------------------------|
| Random sequence generation (selection bias)               | Unclear risk       | Insufficient information                                                                                                                                                                                                                      |
| Allocation concealment (selection bias)                   | Unclear risk       | Insufficient information                                                                                                                                                                                                                      |
| Blinding of participants and personnel (performance bias) | Unclear risk       | Double blinded- however insufficient information to determine whether blind could have been broken                                                                                                                                            |
| Blinding of outcome assessment (detection bias)           | Unclear risk       | Insufficient information                                                                                                                                                                                                                      |
| Incomplete outcome data (attrition bias)                  | Low risk           | Low numbers of dropout due to adverse events (3% PGB, 5% Placebo), however no information on total numbers of dropout (or other reasons for dropout)                                                                                          |
| Selective reporting (reporting bias)                      | Unclear risk       | The weekly mean pain DPRS score was listed as a secondary efficacy outcome in protocol, but included in the primary outcomes in publication. Also, final report introduced DAAC (Duration-adjusted average change score) as a primary outcome |
| Other bias                                                | High risk          | All study investigators had financial ties to the study sponsor                                                                                                                                                                               |

**Holbech 2015****Risk of bias table**

| Bias                                                      | Authors' judgement | Support for judgement                                                                                                                                             |
|-----------------------------------------------------------|--------------------|-------------------------------------------------------------------------------------------------------------------------------------------------------------------|
| Random sequence generation (selection bias)               | Low risk           | Computer-generated randomization                                                                                                                                  |
| Allocation concealment (selection bias)                   | Low risk           | Randomization plan was generated by a person at a pharmacy not otherwise involved in the trial; Sealed, opaque envelopes used in emergency situations.            |
| Blinding of participants and personnel (performance bias) | Low risk           | Double-blinded (patients, investigators and all other staff). Identical tablets.                                                                                  |
| Blinding of outcome assessment (detection bias)           | Low risk           | Patients, investigators, and all other staff involved in the conduct of the trial were blinded to individual treatment assignments for the duration of the study. |
| Incomplete outcome data (attrition bias)                  | Low risk           | Acceptable numbers of drop out (5% placebo, 17% pregabalin). Reasons provided (withdrawn consent, adverse events)                                                 |
| Selective reporting (reporting bias)                      | Unclear risk       | All but 2 of the secondary outcomes in the protocol have been omitted and re-analysed as "exploratory" outcomes in the final analysis.                            |
| Other bias                                                | High risk          | Majority of trial investigators had financial ties to the study sponsor                                                                                           |

**Huffman 2015****Risk of bias table**

| <b>Bias</b>                                               | <b>Authors' judgement</b> | <b>Support for judgement</b>                                                               |
|-----------------------------------------------------------|---------------------------|--------------------------------------------------------------------------------------------|
| Random sequence generation (selection bias)               | Low risk                  | Computer-generated codes                                                                   |
| Allocation concealment (selection bias)                   | Unclear risk              | Not described                                                                              |
| Blinding of participants and personnel (performance bias) | Unclear risk              | Not described                                                                              |
| Blinding of outcome assessment (detection bias)           | Unclear risk              | Not described                                                                              |
| Incomplete outcome data (attrition bias)                  | Low risk                  | Drop-out rates not significantly different between groups. Reasons for drop-outs specified |
| Selective reporting (reporting bias)                      | Low risk                  | Outcomes reported as specified in protocol                                                 |
| Other bias                                                | High risk                 | All authors have, or have had financial ties to pharmaceutical industry                    |

**Kanodia 2011**

**Risk of bias table**

| Bias                                                      | Authors' judgement | Support for judgement                                                                                                   |
|-----------------------------------------------------------|--------------------|-------------------------------------------------------------------------------------------------------------------------|
| Random sequence generation (selection bias)               | Unclear risk       | Insufficient information                                                                                                |
| Allocation concealment (selection bias)                   | Unclear risk       | Insufficient information                                                                                                |
| Blinding of participants and personnel (performance bias) | Unclear risk       | States that it is a double blind trial, but there are no details of how this was performed (or who was blinded).        |
| Blinding of outcome assessment (detection bias)           | Unclear risk       | Insufficient information                                                                                                |
| Incomplete outcome data (attrition bias)                  | Unclear risk       | No details given about whether there was attrition or explanation.                                                      |
| Selective reporting (reporting bias)                      | Unclear risk       | Pre-specified outcomes in methods match those found in results. Poor reporting of outcomes from each intervention group |
| Other bias                                                | Unclear risk       | Very small sample size                                                                                                  |

**Kim 2011****Risk of bias table**

| Bias                                                      | Authors' judgement | Support for judgement                                                                                                    |
|-----------------------------------------------------------|--------------------|--------------------------------------------------------------------------------------------------------------------------|
| Random sequence generation (selection bias)               | Low risk           | Computer generated schedule                                                                                              |
| Allocation concealment (selection bias)                   | Low risk           | Centralised telorandomisation system (IMPALA)                                                                            |
| Blinding of participants and personnel (performance bias) | Unclear risk       | Matching placebo; double-blinded; unclear whether dientical in appearance                                                |
| Blinding of outcome assessment (detection bias)           | Unclear risk       | Insufficient information                                                                                                 |
| Incomplete outcome data (attrition bias)                  | Unclear risk       | Acceptable rates of drop out (15% pregabalin, 17% placebo). Reasons for discontinuation provided. ITT analysis performed |
| Selective reporting (reporting bias)                      | High risk          | Daily Sleep interference scale (DSIS) omitted as a secondary outcome.                                                    |
| Other bias                                                | High risk          | All study authors except one had financial ties to the study sponsor                                                     |

1  
2  
3 **Krcevski Škvarč 2010**  
4

5 **Risk of bias table**  
6

7

| Bias                                                      | Authors' judgement | Support for judgement                                                                                                                                                                                                  |
|-----------------------------------------------------------|--------------------|------------------------------------------------------------------------------------------------------------------------------------------------------------------------------------------------------------------------|
| Random sequence generation (selection bias)               | Unclear risk       | Insufficient information                                                                                                                                                                                               |
| Allocation concealment (selection bias)                   | Unclear risk       | Insufficient information                                                                                                                                                                                               |
| Blinding of participants and personnel (performance bias) | Unclear risk       | Insufficient information                                                                                                                                                                                               |
| Blinding of outcome assessment (detection bias)           | Unclear risk       | Insufficient information                                                                                                                                                                                               |
| Incomplete outcome data (attrition bias)                  | High risk          | High rates of attrition (64% pregabalin, 40% placebo). Reasons for study discontinuation provided. ITT analysis performed and reported.                                                                                |
| Selective reporting (reporting bias)                      | Low risk           | Outcomes specified in the methods match those reported in the results                                                                                                                                                  |
| Other bias                                                | Unclear risk       | Some differences in baseline characteristics; proportion taking antiviral therapy higher in pregabalin group, differences in distribution of zoster and severity of rash. The study authors had no competing interests |

8  
9  
10  
11  
12  
13  
14  
15  
16  
17  
18  
19  
20  
21  
22  
23  
24  
25  
26  
27  
28  
29  
30  
31  
32  
33  
34  
35  
36  
37  
38  
39  
40  
41  
42  
43  
44  
45  
46

1  
2  
3 **Lesser 2004**  
4

5  
6 **Risk of bias table**  
7

| Bias                                                      | Authors' judgement | Support for judgement                                                                                                                                                                                                                                 |
|-----------------------------------------------------------|--------------------|-------------------------------------------------------------------------------------------------------------------------------------------------------------------------------------------------------------------------------------------------------|
| Random sequence generation (selection bias)               | Unclear risk       | Insufficient information as to how it was generated                                                                                                                                                                                                   |
| Allocation concealment (selection bias)                   | Low risk           | Code was maintained by the Clinical Pharmacy Operations department, with no access by other individuals or departments. Medication was shipped to the sites in blocks in unit-dose trays. Each patient was assigned the next sequential random number |
| Blinding of participants and personnel (performance bias) | Unclear risk       | Each patient took one small and two larger capsules, with the proper mix of active medication and placebo, for each dose to achieve double-blinding. Does not specify that the active intervention and placebo were identical                         |
| Blinding of outcome assessment (detection bias)           | Low risk           | Blinding was maintained until all decisions regarding data evaluability were made                                                                                                                                                                     |
| Incomplete outcome data (attrition bias)                  | Unclear risk       | Low drop out rates (8% placebo, 11% PGB). Only states that 18/35 dropouts were due to adverse events.                                                                                                                                                 |
| Selective reporting (reporting bias)                      | Low risk           | Pre-specified outcomes in methods match those found in results.                                                                                                                                                                                       |
| Other bias                                                | High risk          | Baseline characteristics: more people in placebo group taking antidiabetic medication (insulin) compared to PGB group. More T1DM and T2DM in placebo group. The study authors had financial ties to the sponsor.                                      |



**Liu 2015****Risk of bias table**

| Bias                                                      | Authors' judgement | Support for judgement                                                                                             |
|-----------------------------------------------------------|--------------------|-------------------------------------------------------------------------------------------------------------------|
| Random sequence generation (selection bias)               | Unclear risk       | Insufficient information                                                                                          |
| Allocation concealment (selection bias)                   | Low risk           | Interactive voice response system                                                                                 |
| Blinding of participants and personnel (performance bias) | Unclear risk       | Placebo was matched to pregabalin. Not specified whether active and placebo pills were identical in appearance    |
| Blinding of outcome assessment (detection bias)           | Unclear risk       | Insufficient information.                                                                                         |
| Incomplete outcome data (attrition bias)                  | Low risk           | Acceptable drop out rates (12% pregabalin, 16% placebo). Reasons for withdrawal provided. ITT analysis performed. |
| Selective reporting (reporting bias)                      | High risk          | Omitted pre-specified secondary outcomes relating to the HADS Anxiety and Depression score.                       |
| Other bias                                                | Unclear risk       | Two authors had financial ties to the study sponsor                                                               |

**Mathieson 2017****Risk of bias table**

| Bias                                                      | Authors' judgement | Support for judgement                                                                                                                                                                                                                                                                           |
|-----------------------------------------------------------|--------------------|-------------------------------------------------------------------------------------------------------------------------------------------------------------------------------------------------------------------------------------------------------------------------------------------------|
| Random sequence generation (selection bias)               | Low risk           | Computer-derived random-number sequence                                                                                                                                                                                                                                                         |
| Allocation concealment (selection bias)                   | Low risk           | Packaged in white, opaque, sealed containers                                                                                                                                                                                                                                                    |
| Blinding of participants and personnel (performance bias) | Unclear risk       | Pregabalin capsules and matching placebo capsules. Unclear whether they were identical in appearance                                                                                                                                                                                            |
| Blinding of outcome assessment (detection bias)           | Low risk           | Some outcomes were assessed by means of telephone contact with the patients by trained trial researchers, but reports that all the research staff, statisticians, trial clinicians, and patients were unaware of the trial-group assignments during recruitment, data collection, and analysis. |
| Incomplete outcome data (attrition bias)                  | Low risk           | Acceptable number of drop outs (16% pregabalin, 14% placebo). Reasons provided. ITT analysis performed (although it did not include 2 randomised patients).                                                                                                                                     |
| Selective reporting (reporting bias)                      | High risk          | The primary outcome was measured at fewer time points than was specified in the protocol which specified pain intensity would be measured at baseline then weeks 2,4,8,12,26 and 52. Study reported pain only at weeks 8, 52. All other outcomes remained the same as pre-specified.            |
| Other bias                                                | Unclear risk       | Some differences in baseline characteristics, such as sex, dermatomal pain, neurologic deficit, clinically suspected level of spine associated with leg pain, and PainDETECT scores. Three authors had financial ties to the pharmaceutical industry                                            |

**Moon 2010**

**Risk of bias table**

| Bias                                                      | Authors' judgement | Support for judgement                                                                                                                     |
|-----------------------------------------------------------|--------------------|-------------------------------------------------------------------------------------------------------------------------------------------|
| Random sequence generation (selection bias)               | Low risk           | Computerized tele-randomization system                                                                                                    |
| Allocation concealment (selection bias)                   | Low risk           | Central web–telephone software                                                                                                            |
| Blinding of participants and personnel (performance bias) | Low risk           | Mentions double-blinded; "pregabalin and matching placebo"                                                                                |
| Blinding of outcome assessment (detection bias)           | Low risk           | Study report does not specify, although protocol states that the outcome assessors were blinded.                                          |
| Incomplete outcome data (attrition bias)                  | Unclear risk       | Uneven numbers of drop out (14.8% pregabalin, 20.5% placebo), however reasons for drop out provided. ITT analysis performed and reported. |
| Selective reporting (reporting bias)                      | Low risk           | All pre-specified outcomes in protocol reported.                                                                                          |
| Other bias                                                | Unclear risk       | The authors fail to declare whether they had financial ties to Pfizer.                                                                    |

**Rauck 2013****Risk of bias table**

| Bias                                                      | Authors' judgement | Support for judgement                                                                                                                                                               |
|-----------------------------------------------------------|--------------------|-------------------------------------------------------------------------------------------------------------------------------------------------------------------------------------|
| Random sequence generation (selection bias)               | Low risk           | Computer-generated sequence                                                                                                                                                         |
| Allocation concealment (selection bias)                   | Low risk           | Drug containers of identical appearance                                                                                                                                             |
| Blinding of participants and personnel (performance bias) | Low risk           | PGB was provided with identical-in-appearance placebo capsules to ensure blinding of subjects and investigators. All tablets were provided by an unblinded, third-party pharmacist. |
| Blinding of outcome assessment (detection bias)           | Low risk           | Study does not provide sufficient information, although trial protocol does state that the outcome assessors were blinded.                                                          |
| Incomplete outcome data (attrition bias)                  | Unclear risk       | Reasons for dropout reported although attrition rates were 29% for pregabalin and 25% for placebo.                                                                                  |
| Selective reporting (reporting bias)                      | Low risk           | Reports all pre-specified outcomes from the protocol.                                                                                                                               |
| Other bias                                                | High risk          | The authors had financial ties to the sponsor                                                                                                                                       |

**Richter 2005**

**Risk of bias table**

| Bias                                                      | Authors' judgement | Support for judgement                                                                                                                                                      |
|-----------------------------------------------------------|--------------------|----------------------------------------------------------------------------------------------------------------------------------------------------------------------------|
| Random sequence generation (selection bias)               | Low risk           | computer generated sequence                                                                                                                                                |
| Allocation concealment (selection bias)                   | Unclear risk       | Insufficient information                                                                                                                                                   |
| Blinding of participants and personnel (performance bias) | Low risk           | Study capsules were identical (doses were also matched to size of tablets for both pregabalin and placebo)                                                                 |
| Blinding of outcome assessment (detection bias)           | Unclear risk       | Blind was maintained until completion of study and data evaluability determination however does not specify whether outcome assessors or other investigators were blinded. |
| Incomplete outcome data (attrition bias)                  | Low risk           | Acceptable attrition rates (15% placebo, 5% PGB 150mg/d, 12% PGB 600mg/d [overall 9% pregabalin]). Reasons for drop out provided.                                          |
| Selective reporting (reporting bias)                      | Low risk           | Outcomes specified in the Methods match those reported in the results.                                                                                                     |
| Other bias                                                | High risk          | Two-thirds of the authors had financial ties to the study sponsor                                                                                                          |

1  
2  
3 **Rosenstock 2004**  
4

5 **Risk of bias table**  
6  
7

| Bias                                                      | Authors' judgement | Support for judgement                                                                                                                                                                   |
|-----------------------------------------------------------|--------------------|-----------------------------------------------------------------------------------------------------------------------------------------------------------------------------------------|
| Random sequence generation (selection bias)               | Unclear risk       | Sequential randomization numbers according to a randomization schedule designed to attain an even distribution between pregabalin and placebo. Unclear how this sequence was generated. |
| Allocation concealment (selection bias)                   | Low risk           | Study medication was packaged and labeled with sequential randomization numbers.                                                                                                        |
| Blinding of participants and personnel (performance bias) | Unclear risk       | All medications were packaged in blinded fashion. Not specified whether the active intervention and placebo were identical in appearance                                                |
| Blinding of outcome assessment (detection bias)           | Unclear risk       | Insufficient information                                                                                                                                                                |
| Incomplete outcome data (attrition bias)                  | Low risk           | Acceptable attrition rates (14% pregabalin, 11% placebo). Reasons for withdrawal provided. ITT analysis performed.                                                                      |
| Selective reporting (reporting bias)                      | Low risk           | Outcomes specified in the Methods match those reported in the results.                                                                                                                  |
| Other bias                                                | Unclear risk       | The authors did not state whether they had any competing interests                                                                                                                      |

**Sabatowski 2004**

**Risk of bias table**

| Bias                                                      | Authors' judgement | Support for judgement                                                                                                                                                                                                                                            |
|-----------------------------------------------------------|--------------------|------------------------------------------------------------------------------------------------------------------------------------------------------------------------------------------------------------------------------------------------------------------|
| Random sequence generation (selection bias)               | Low risk           | Computer-generated code                                                                                                                                                                                                                                          |
| Allocation concealment (selection bias)                   | Low risk           | Study medication was packaged and labeled with sequential randomisation numbers                                                                                                                                                                                  |
| Blinding of participants and personnel (performance bias) | Unclear risk       | All medications were blinded and taken orally. Placebo capsules were identical in appearance to capsules containing active drug. However, an investigator could break the randomisation code and, thus, the blind for a patient if a medical emergency occurred. |
| Blinding of outcome assessment (detection bias)           | Unclear risk       | Insufficient information                                                                                                                                                                                                                                         |
| Incomplete outcome data (attrition bias)                  | Unclear risk       | Reasons for dropout provided, however unequal attrition rates across the groups (12.3% PGB 150mg/d, 21.1% PGB 300mg/d, Overall PGB 16.6%, 24.7% Placebo). Both ITT and PPA reported but ITT value used in abstract.                                              |
| Selective reporting (reporting bias)                      | Unclear risk       | Results of CGIC are not reported, just states that it shows a "statistically significant improvement".                                                                                                                                                           |
| Other bias                                                | High risk          | Majority of the investigators had financial ties to the study sponsor                                                                                                                                                                                            |

1  
2  
3 **Satoh 2011**  
4

5 **Risk of bias table**  
6  
7

| Bias                                                      | Authors' judgement | Support for judgement                                                                                                                                                             |
|-----------------------------------------------------------|--------------------|-----------------------------------------------------------------------------------------------------------------------------------------------------------------------------------|
| Random sequence generation (selection bias)               | High risk          | Allocation based on the results of a laboratory test (CrCl)                                                                                                                       |
| Allocation concealment (selection bias)                   | Low risk           | Centrally organised using a validated web-based system.                                                                                                                           |
| Blinding of participants and personnel (performance bias) | Unclear risk       | Insufficient information                                                                                                                                                          |
| Blinding of outcome assessment (detection bias)           | Unclear risk       | Insufficient information                                                                                                                                                          |
| Incomplete outcome data (attrition bias)                  | High risk          | Unequal dropout across the groups (11.8% placebo, 14.7% 300 mg/day PGB, 28.9% in the 600 mg/day PGB). All reasons for attrition were not provided.                                |
| Selective reporting (reporting bias)                      | High risk          | Secondary outcome added in published study: patient impression of subjective symptoms (including numbness, pain and paraesthesia) which showed favourable results for pregabalin. |
| Other bias                                                | High risk          | All authors had financial ties to the study sponsor                                                                                                                               |



Shabbir 2011

Risk of bias table

| Bias                                                      | Authors' judgement | Support for judgement                                                                                                                                                                                                                                     |
|-----------------------------------------------------------|--------------------|-----------------------------------------------------------------------------------------------------------------------------------------------------------------------------------------------------------------------------------------------------------|
| Random sequence generation (selection bias)               | Unclear risk       | Insufficient information                                                                                                                                                                                                                                  |
| Allocation concealment (selection bias)                   | Unclear risk       | Insufficient information                                                                                                                                                                                                                                  |
| Blinding of participants and personnel (performance bias) | Unclear risk       | Insufficient information                                                                                                                                                                                                                                  |
| Blinding of outcome assessment (detection bias)           | Unclear risk       | Insufficient information                                                                                                                                                                                                                                  |
| Incomplete outcome data (attrition bias)                  | Low risk           | <u>Appears to be no attrition from either of the randomised groups.</u>                                                                                                                                                                                   |
| Selective reporting (reporting bias)                      | Low risk           | Outcomes specified in the methods match those reported in the results.                                                                                                                                                                                    |
| Other bias                                                | High risk          | Baseline characteristics table not provided to compare across the intervention arms. Pregabalin was administered twice daily; daily frequency of placebo administration not specified. The authors did not state whether they had any competing interests |

1  
2  
3 **Siddall 2006**  
4

5 **Risk of bias table**  
6  
7

| Bias                                                      | Authors' judgement | Support for judgement                                                                                                           |
|-----------------------------------------------------------|--------------------|---------------------------------------------------------------------------------------------------------------------------------|
| Random sequence generation (selection bias)               | Low risk           | Computer generated                                                                                                              |
| Allocation concealment (selection bias)                   | Low risk           | Study medication was packaged and labeled with sequential randomization numbers according to the randomization schedule         |
| Blinding of participants and personnel (performance bias) | Low risk           | Medication was blinded by using capsules of identical size, color, taste, and smell for placebo and pregabalin                  |
| Blinding of outcome assessment (detection bias)           | Unclear risk       | Insufficient information                                                                                                        |
| Incomplete outcome data (attrition bias)                  | Unclear risk       | High (and uneven) attrition rates: pregabalin 30%, placebo 45%. Reasons for withdrawal provided. ITT analysis results reported. |
| Selective reporting (reporting bias)                      | Low risk           | Outcomes specified in the Methods match those reported in the results.                                                          |
| Other bias                                                | High risk          | All trial investigators had financial ties to the study sponsor                                                                 |

**Simpson 2010****Risk of bias table**

| Bias                                                      | Authors' judgement | Support for judgement                                                                                                                                          |
|-----------------------------------------------------------|--------------------|----------------------------------------------------------------------------------------------------------------------------------------------------------------|
| Random sequence generation (selection bias)               | Low risk           | Computer-generated sequence                                                                                                                                    |
| Allocation concealment (selection bias)                   | Low risk           | Central computerized telerandomization system, ensured that investigators remained blinded to treatment assignments during the study                           |
| Blinding of participants and personnel (performance bias) | Low risk           | Study drug and placebo were identical in appearance in order to preserve blinding.                                                                             |
| Blinding of outcome assessment (detection bias)           | Low risk           | Study does not provide sufficient information, although trial protocol does state that the outcome assessors were blinded.                                     |
| Incomplete outcome data (attrition bias)                  | Low risk           | Similar rates of attrition (21% pregabalin, 19% placebo). Reasons for drop out provided, however not all randomised patients are included in the ITT analysis. |
| Selective reporting (reporting bias)                      | High risk          | Prespecified outcomes (assessing QANeP) omitted in final study. Safety outcomes not prespecified in protocol added to final study.                             |
| Other bias                                                | High risk          | All trial investigators had, or have had financial ties to the study sponsor                                                                                   |

## Simpson 2014

### Risk of bias table

| Bias                                                      | Authors' judgement | Support for judgement                                                                                                                                                  |
|-----------------------------------------------------------|--------------------|------------------------------------------------------------------------------------------------------------------------------------------------------------------------|
| Random sequence generation (selection bias)               | Unclear risk       | Computer generated "pseudorandom" code                                                                                                                                 |
| Allocation concealment (selection bias)                   | Low risk           | Automated telorandomization system.                                                                                                                                    |
| Blinding of participants and personnel (performance bias) | Low risk           | Patients were randomised in a double blind fashion through study sponsors sysetm for randomization and dispensing.                                                     |
| Blinding of outcome assessment (detection bias)           | Unclear risk       | Participants, investigators and study sponsor personnel were blinded to interventions after treatment assignment, but unclear whether this includes outcome assessors. |
| Incomplete outcome data (attrition bias)                  | High risk          | Reasons provided for drop outs though there is a high attrition rate (31% pregabalin, 31% placebo).                                                                    |
| Selective reporting (reporting bias)                      | Low risk           | Outcomes specified in the protocol match those reported in the study.                                                                                                  |
| Other bias                                                | High risk          | Study prematurely terminated by Pfizer following unfavourable results. All trial investigators had financial ties to the study sponsor                                 |

**Stacey 2008****Risk of bias table**

| Bias                                                      | Authors' judgement | Support for judgement                                                                                                                                 |
|-----------------------------------------------------------|--------------------|-------------------------------------------------------------------------------------------------------------------------------------------------------|
| Random sequence generation (selection bias)               | Unclear risk       | Insufficient information                                                                                                                              |
| Allocation concealment (selection bias)                   | Unclear risk       | Insufficient information                                                                                                                              |
| Blinding of participants and personnel (performance bias) | Unclear risk       | Insufficient information; reports double-blinded but unclear who is blinded.                                                                          |
| Blinding of outcome assessment (detection bias)           | Unclear risk       | Insufficient information                                                                                                                              |
| Incomplete outcome data (attrition bias)                  | Unclear risk       | Rates of attrition are not comparable across the groups (5.5% flexible dose PGB, 20.5% fixed dose PGB, 16.7% Placebo). Reasons for drop out provided. |
| Selective reporting (reporting bias)                      | Low risk           | Outcomes specified in the methods match those reported in the results.                                                                                |
| Other bias                                                | High risk          | All authors had financial ties to the study sponsor                                                                                                   |

1  
2  
3 **Tolle 2008**  
4

5 **Risk of bias table**  
6  
7

| Bias                                                      | Authors' judgement | Support for judgement                                                                                                                                                                         |
|-----------------------------------------------------------|--------------------|-----------------------------------------------------------------------------------------------------------------------------------------------------------------------------------------------|
| Random sequence generation (selection bias)               | Unclear risk       | Insufficient information                                                                                                                                                                      |
| Allocation concealment (selection bias)                   | Unclear risk       | Insufficient information                                                                                                                                                                      |
| Blinding of participants and personnel (performance bias) | Unclear risk       | Insufficient information                                                                                                                                                                      |
| Blinding of outcome assessment (detection bias)           | Unclear risk       | Insufficient information                                                                                                                                                                      |
| Incomplete outcome data (attrition bias)                  | Low risk           | Similar attrition rates across the groups (Placebo 17.7%, PGB 150mg/d 17.2%, PGB 300mg/d 20.2%, PGB 300/600mg/d 22.8%). Reasons for withdrawal provided. ITT analysis performed and reported. |
| Selective reporting (reporting bias)                      | High risk          | EuroQoL Health Utilities Index not reported in final results (although mentioned in the abstract and methods).                                                                                |
| Other bias                                                | High risk          | All authors had financial ties to the study sponsor                                                                                                                                           |

van Seventer 2006

Risk of bias table

| Bias                                                      | Authors' judgement | Support for judgement                                                                                                                                                         |
|-----------------------------------------------------------|--------------------|-------------------------------------------------------------------------------------------------------------------------------------------------------------------------------|
| Random sequence generation (selection bias)               | Unclear risk       | Insufficient information                                                                                                                                                      |
| Allocation concealment (selection bias)                   | Unclear risk       | Insufficient information                                                                                                                                                      |
| Blinding of participants and personnel (performance bias) | Unclear risk       | Insufficient information although states double-blinded.                                                                                                                      |
| Blinding of outcome assessment (detection bias)           | Unclear risk       | Insufficient information                                                                                                                                                      |
| Incomplete outcome data (attrition bias)                  | Unclear risk       | High attrition rates across the groups (36.6% placebo, 29.9% PGB 150mg/d, 36.7% PGB 300mg/d, 36.6% PGB 300/600mg/d). Reasons for withdrawal provided. ITT analysis performed. |
| Selective reporting (reporting bias)                      | Low risk           | Outcomes specified in the methods match those reported in the results.                                                                                                        |
| Other bias                                                | High risk          | All study authors had financial ties to the study sponsor                                                                                                                     |

1  
2  
3 **van Seventer 2010**  
4

5  
6 **Risk of bias table**  
7

| <b>Bias</b>                                               | <b>Authors' judgement</b> | <b>Support for judgement</b>                                                                                                                                                                                                                                                                                                                                                                                                                                                                                            |
|-----------------------------------------------------------|---------------------------|-------------------------------------------------------------------------------------------------------------------------------------------------------------------------------------------------------------------------------------------------------------------------------------------------------------------------------------------------------------------------------------------------------------------------------------------------------------------------------------------------------------------------|
| Random sequence generation (selection bias)               | Unclear risk              | Insufficient information.                                                                                                                                                                                                                                                                                                                                                                                                                                                                                               |
| Allocation concealment (selection bias)                   | Low risk                  | An Interactive Voice Recognition System was used.                                                                                                                                                                                                                                                                                                                                                                                                                                                                       |
| Blinding of participants and personnel (performance bias) | Low risk                  | Medication was blinded by using capsules of identical size, color, taste and smell for placebo, and pregabalin.                                                                                                                                                                                                                                                                                                                                                                                                         |
| Blinding of outcome assessment (detection bias)           | Low risk                  | Trial protocol specifies that outcome assessor was blinded.                                                                                                                                                                                                                                                                                                                                                                                                                                                             |
| Incomplete outcome data (attrition bias)                  | Low risk                  | Reasons for discontinuation provided, attrition rates comparable across the groups- 24.4% for pregabalin, 22.8% for placebo. ITT analysis performed (although excluded one patient from each group due to lack of post-baseline data).                                                                                                                                                                                                                                                                                  |
| Selective reporting (reporting bias)                      | High risk                 | Protocol specified CGIC a secondary outcome however this was omitted in published report. Other omitted outcomes include Pain Treatment Satisfaction Scale (PTSS)- Impact of current pain medication, satisfaction with current pain medication, medication characteristics, efficacy; Neuropathic Pain Symptom Inventory total intensity score, Medical Outcome Study Cognitive Subscale (reasoning, concentration, confusion, memory, attention, thinking); Davidson Trauma scale (severity, frequency, total score). |
| Other bias                                                | High risk                 | All study authors had financial ties to the study sponsor                                                                                                                                                                                                                                                                                                                                                                                                                                                               |



**Vranken 2008**

**Risk of bias table**

| Bias                                                      | Authors' judgement | Support for judgement                                                                                                                                                                              |
|-----------------------------------------------------------|--------------------|----------------------------------------------------------------------------------------------------------------------------------------------------------------------------------------------------|
| Random sequence generation (selection bias)               | Low risk           | Randomized according to the automated assignment system                                                                                                                                            |
| Allocation concealment (selection bias)                   | Low risk           | Hospital pharmacist prepared identical, coded medication bottles containing identical capsules of pregabalin or placebo. Unclear if pharmacist was otherwise involved in the study or third party. |
| Blinding of participants and personnel (performance bias) | Low risk           | Coded medication bottle was supplied by hospital pharmacist to the blinded treating physician. Medication bottle contained identical capsules.                                                     |
| Blinding of outcome assessment (detection bias)           | Unclear risk       | Insufficient information                                                                                                                                                                           |
| Incomplete outcome data (attrition bias)                  | Low risk           | Reasonable rates of attrition (15% pregabalin, 20% of placebo). Reasons for discontinuation provided.                                                                                              |
| Selective reporting (reporting bias)                      | Low risk           | Outcomes specified in the methods match those reported in the results.                                                                                                                             |
| Other bias                                                | Unclear risk       | Some differences in baseline characteristics including site of pain and concomitant therapies. The authors did not report whether they had any competing interests                                 |

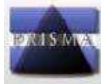

# PRISMA 2009 Checklist

| Section/topic                      | #  | Checklist item                                                                                                                                                                                                                                                                                              | Reported on page # |
|------------------------------------|----|-------------------------------------------------------------------------------------------------------------------------------------------------------------------------------------------------------------------------------------------------------------------------------------------------------------|--------------------|
| <b>TITLE</b>                       |    |                                                                                                                                                                                                                                                                                                             |                    |
| Title                              | 1  | Identify the report as a systematic review, meta-analysis, or both.                                                                                                                                                                                                                                         | 1                  |
| <b>ABSTRACT</b>                    |    |                                                                                                                                                                                                                                                                                                             |                    |
| Structured summary                 | 2  | Provide a structured summary including, as applicable: background; objectives; data sources; study eligibility criteria, participants, and interventions; study appraisal and synthesis methods; results; limitations; conclusions and implications of key findings; systematic review registration number. | 2-3                |
| <b>INTRODUCTION</b>                |    |                                                                                                                                                                                                                                                                                                             |                    |
| Rationale                          | 3  | Describe the rationale for the review in the context of what is already known.                                                                                                                                                                                                                              | 4-5                |
| Objectives                         | 4  | Provide an explicit statement of questions being addressed with reference to participants, interventions, comparisons, outcomes, and study design (PICOS).                                                                                                                                                  | 5                  |
| <b>METHODS</b>                     |    |                                                                                                                                                                                                                                                                                                             |                    |
| Protocol and registration          | 5  | Indicate if a review protocol exists, if and where it can be accessed (e.g., Web address), and, if available, provide registration information including registration number.                                                                                                                               | Suppl.             |
| Eligibility criteria               | 6  | Specify study characteristics (e.g., PICOS, length of follow-up) and report characteristics (e.g., years considered, language, publication status) used as criteria for eligibility, giving rationale.                                                                                                      | 5                  |
| Information sources                | 7  | Describe all information sources (e.g., databases with dates of coverage, contact with study authors to identify additional studies) in the search and date last searched.                                                                                                                                  | 5                  |
| Search                             | 8  | Present full electronic search strategy for at least one database, including any limits used, such that it could be repeated.                                                                                                                                                                               | Appendix 1         |
| Study selection                    | 9  | State the process for selecting studies (i.e., screening, eligibility, included in systematic review, and, if applicable, included in the meta-analysis).                                                                                                                                                   | 5                  |
| Data collection process            | 10 | Describe method of data extraction from reports (e.g., piloted forms, independently, in duplicate) and any processes for obtaining and confirming data from investigators.                                                                                                                                  | 6                  |
| Data items                         | 11 | List and define all variables for which data were sought (e.g., PICOS, funding sources) and any assumptions and simplifications made.                                                                                                                                                                       | 6                  |
| Risk of bias in individual studies | 12 | Describe methods used for assessing risk of bias of individual studies (including specification of whether this was done at the study or outcome level), and how this information is to be used in any data synthesis.                                                                                      | 6                  |
| Summary measures                   | 13 | State the principal summary measures (e.g., risk ratio, difference in means).                                                                                                                                                                                                                               | 6                  |
| Synthesis of results               | 14 | Describe the methods of handling data and combining results of studies, if done, including measures of consistency (e.g., $I^2$ ) for each meta-analysis.                                                                                                                                                   | 6                  |



# PRISMA 2009 Checklist

| Section/topic                 | #  | Checklist item                                                                                                                                                                                           | Reported on page # |
|-------------------------------|----|----------------------------------------------------------------------------------------------------------------------------------------------------------------------------------------------------------|--------------------|
| Risk of bias across studies   | 15 | Specify any assessment of risk of bias that may affect the cumulative evidence (e.g., publication bias, selective reporting within studies).                                                             | 6                  |
| Additional analyses           | 16 | Describe methods of additional analyses (e.g., sensitivity or subgroup analyses, meta-regression), if done, indicating which were pre-specified.                                                         | 6                  |
| <b>RESULTS</b>                |    |                                                                                                                                                                                                          |                    |
| Study selection               | 17 | Give numbers of studies screened, assessed for eligibility, and included in the review, with reasons for exclusions at each stage, ideally with a flow diagram.                                          | 7                  |
| Study characteristics         | 18 | For each study, present characteristics for which data were extracted (e.g., study size, PICOS, follow-up period) and provide the citations.                                                             | 7                  |
| Risk of bias within studies   | 19 | Present data on risk of bias of each study and, if available, any outcome level assessment (see item 12).                                                                                                | 7                  |
| Results of individual studies | 20 | For all outcomes considered (benefits or harms), present, for each study: (a) simple summary data for each intervention group (b) effect estimates and confidence intervals, ideally with a forest plot. | 7-19               |
| Synthesis of results          | 21 | Present results of each meta-analysis done, including confidence intervals and measures of consistency.                                                                                                  | 7-19               |
| Risk of bias across studies   | 22 | Present results of any assessment of risk of bias across studies (see Item 15).                                                                                                                          | 7-19               |
| Additional analysis           | 23 | Give results of additional analyses, if done (e.g., sensitivity or subgroup analyses, meta-regression [see Item 16]).                                                                                    | 7-19               |
| <b>DISCUSSION</b>             |    |                                                                                                                                                                                                          |                    |
| Summary of evidence           | 24 | Summarize the main findings including the strength of evidence for each main outcome; consider their relevance to key groups (e.g., healthcare providers, users, and policy makers).                     | 20                 |
| Limitations                   | 25 | Discuss limitations at study and outcome level (e.g., risk of bias), and at review-level (e.g., incomplete retrieval of identified research, reporting bias).                                            | 22                 |
| Conclusions                   | 26 | Provide a general interpretation of the results in the context of other evidence, and implications for future research.                                                                                  | 24                 |
| <b>FUNDING</b>                |    |                                                                                                                                                                                                          |                    |
| Funding                       | 27 | Describe sources of funding for the systematic review and other support (e.g., supply of data); role of funders for the systematic review.                                                               | 24                 |

From: Moher D, Liberati A, Tetzlaff J, Altman DG, The PRISMA Group (2009). Preferred Reporting Items for Systematic Reviews and Meta-Analyses: The PRISMA Statement. PLoS Med 6(6): e1000097. doi:10.1371/journal.pmed1000097

For more information, visit: [www.prisma-statement.org](http://www.prisma-statement.org).

# BMJ Open

## Benefits and harms of pregabalin in the management of neuropathic pain: a rapid review and meta-analysis of randomized clinical trials

|                                 |                                                                                                                                                                                                                                                                                                                                                                                                                          |
|---------------------------------|--------------------------------------------------------------------------------------------------------------------------------------------------------------------------------------------------------------------------------------------------------------------------------------------------------------------------------------------------------------------------------------------------------------------------|
| Journal:                        | <i>BMJ Open</i>                                                                                                                                                                                                                                                                                                                                                                                                          |
| Manuscript ID                   | bmjopen-2018-023600.R2                                                                                                                                                                                                                                                                                                                                                                                                   |
| Article Type:                   | Research                                                                                                                                                                                                                                                                                                                                                                                                                 |
| Date Submitted by the Author:   | 19-Nov-2018                                                                                                                                                                                                                                                                                                                                                                                                              |
| Complete List of Authors:       | Onakpoya, Igho; University of Oxford, Primary Care Health Sciences<br>Thomas, Elizabeth; Bond University Faculty of Health Sciences and<br>Medicine, Faculty of Health Sciences and Medicine<br>Lee, Joseph; University of Oxford, Nuffield Department of Primary Care<br>Health Sciences<br>Goldacre, Ben; University of Oxford, Primary Care Health Sciences<br>Heneghan, Carl; Oxford University, Primary Health Care |
| <b>Primary Subject Heading</b>: | Evidence based practice                                                                                                                                                                                                                                                                                                                                                                                                  |
| Secondary Subject Heading:      | Nutrition and metabolism, Pharmacology and therapeutics                                                                                                                                                                                                                                                                                                                                                                  |
| Keywords:                       | pregabalin, benefits, harms, systematic review, meta-analysis                                                                                                                                                                                                                                                                                                                                                            |
|                                 |                                                                                                                                                                                                                                                                                                                                                                                                                          |

SCHOLARONE™  
Manuscripts

1  
2  
3 **Benefits and harms of pregabalin in the management of neuropathic pain: a rapid**  
4 **review and meta-analysis of randomized clinical trials**  
5  
6  
7  
8  
9  
10  
11  
12  
13  
14  
15  
16

17 Igho J Onakpoya, research fellow<sup>1</sup>, Elizabeth T Thomas, medical student<sup>2</sup>, Joseph Lee, nihr  
18 in practice fellow<sup>1</sup>, Ben Goldacre, senior clinical research fellow<sup>1</sup>, Carl J Heneghan, director<sup>1</sup>  
19  
20  
21  
22  
23

24 <sup>1</sup>University of Oxford, Centre for Evidence-Based Medicine, Nuffield Department of Primary  
25 Care Health Sciences, Radcliffe Primary Care Building, Radcliffe Observatory Quarter,  
26 Oxford, United Kingdom OX2 6GG  
27  
28  
29

30 <sup>2</sup>Faculty of Health Sciences and Medicine, Bond University, 14 University Drive, Robina,  
31 Australia QLD 4226  
32  
33  
34  
35  
36  
37  
38  
39  
40  
41

42 **Correspondence to** IJ Onakpoya [igho.onakpoya@phc.ox.ac.uk](mailto:igho.onakpoya@phc.ox.ac.uk)  
43  
44  
45  
46  
47  
48  
49  
50  
51  
52  
53  
54  
55  
56  
57  
58  
59  
60

## ABSTRACT

**Objective** To assess the benefits and harms of pregabalin in the management of neuropathic pain

**Design** Rapid review and meta-analysis of phase III randomized placebo-controlled trials.

**Participants** Adults aged 18 and above with neuropathic pain defined according to the International Association for the Study of Pain (IASP) criteria.

**Interventions** Pregabalin or placebo.

**Primary and secondary outcome measures** Our primary outcomes were pain (as measured using validated scales) and adverse events. Our secondary outcomes were sleep disturbance, quality of life (QOL), patient global impression of change (PGIC), clinician global impression (CGI) scale, anxiety and depression scores, overall discontinuations and discontinuations because of adverse events.

**Results** We included 28 trials comprising 6087 participants. The neuropathic pain conditions studied were diabetic peripheral neuropathy, post-herpetic neuralgia, herpes zoster, sciatica (radicular pain), post-stroke pain and spinal cord injury-related pain. Patients who took pregabalin reported significant reductions in pain (numerical rating scale (NRS)) compared to placebo, SMD -0.49 (95% CI -0.66 to -0.32,  $P < 0.00001$ ); very low quality evidence. Pregabalin significantly reduced sleep interference scores (NRS) compared with placebo, SMD -0.38 (95% CI -0.50 to -0.26,  $P < 0.00001$ ) moderate quality evidence. Pregabalin significantly increased the risk of adverse events compared with placebo, RR 1.33 (95% CI 1.23 to 1.44,  $P < 0.00001$ , low quality evidence). The risks of experiencing weight gain, somnolence, dizziness, peripheral oedema, fatigue, visual disturbances, ataxia, non-peripheral oedema, vertigo and euphoria were significantly increased with pregabalin. Pregabalin was significantly more likely than placebo to lead to discontinuation of the drug because of adverse events, RR 1.91 (95% CI 1.54 to 2.37,  $P < 0.00001$ ), low quality evidence.

1  
2  
3 **Conclusion** Pregabalin has beneficial effects on some symptoms of neuropathic pain.

4  
5 However, its use significantly increases the risk of a number of adverse events and  
6  
7 discontinuation due to adverse events. The quality of the evidence from journal publications  
8  
9 is low.  
10  
11  
12  
13  
14  
15  
16

### 17 **Strengths and limitations of the study**

- 18
- 19
- 20 ● We used the Cochrane criteria to assess the risk of bias.
- 21
- 22 ● This is the first review that rates the quality of the evidence for each outcome assessed.
- 23
- 24 ● The review may be prone to sampling bias, and we may have missed potentially eligible
- 25 studies.
- 26
- 27 ● We did not assess the extent to which different doses of pregabalin influenced the
- 28 outcomes.
- 29
- 30
- 31
- 32
- 33
- 34
- 35
- 36
- 37
- 38
- 39
- 40
- 41
- 42
- 43
- 44
- 45
- 46
- 47
- 48
- 49
- 50
- 51
- 52
- 53
- 54
- 55
- 56
- 57
- 58
- 59
- 60

## INTRODUCTION

Pregabalin is a gabapentinoid licensed for treatment of neurologic disorders. It is one of the earlier drugs approved by the United States Food and Drug Administration (FDA) (2004) for the treatment of painful diabetic neuropathy (PDN) and post-herpetic neuralgia (PHN).<sup>1</sup>

Pregabalin is thought to exert its analgesic action through antagonistic activity at the voltage gated Ca<sup>2+</sup> channels where it binds to the alpha-2-delta subunit.<sup>1,2</sup>

Prescriptions of pregabalin (and gabapentin) have markedly increased over the last few years. In the US, prescriptions for pregabalin rose from 39 million in 2012 to 64 million in 2016 (annual prescription costs increased from approximately \$2 billion to \$4.4 billion over the same period).<sup>3</sup> In the UK, pregabalin use increased 350% over a five year period between 2008 and 2013.<sup>4</sup> In England alone, there were over 6.2 million prescriptions of pregabalin across GP practices in 2017 costing about \$440 million.<sup>5</sup>

Pregabalin is recommended as first-line pharmacologic agent for management of neuropathic pain<sup>6</sup>. There is, however, some evidence of increased mortality attributed to pregabalin in the UK,<sup>7</sup> and this has led some authors to caution clinicians about the risk of harms when prescribing.<sup>8</sup> The risks are thought to be particularly acute for patients who use heroin and those who misuse gabapentinoids. Indeed, the UK government is soon to classify the drug as a class C controlled substance because of its abuse potential and increased reports of deaths attributed to its use.<sup>9</sup> Practicing clinicians have also recently called for the evidence for the effectiveness of pregabalin to be re-examined in the light of its potential to cause harms.<sup>3,4</sup>

Rapid reviews use accelerated methods to identify and synthesize the evidence from the literature in order to meet the needs of target audiences including policy makers, healthcare



1  
2  
3 professionals and patient groups.<sup>10</sup> The objective of this rapid review was therefore to  
4  
5 evaluate the evidence for benefits and harms of pregabalin in the treatment of neuropathic  
6  
7 pain in adults, using evidence from published randomized clinical trials (RCTs).  
8  
9

## 10 11 12 **METHODS**

13  
14 We conducted electronic searches in the following databases: Medline, Embase, and  
15  
16 Cochrane Central Register of Controlled Trials (CENTRAL). We searched each database  
17  
18 from inception till January 2018. No language restrictions were imposed. [See appendix 1 for  
19  
20 a full search strategy]. We also hand searched the bibliography of eligible studies. [See  
21  
22 appendix 2 for the full protocol].  
23  
24  
25

26  
27 We included phase III double-blinded placebo-controlled RCTs (efficacy studies) assessing  
28  
29 the effects of pregabalin on neuropathic pain in adults aged 18 years and above. We included  
30  
31 studies based on the definition of the International Association for the Study of Pain (IASP)  
32  
33 definition.<sup>11</sup> These included trials on diabetic neuropathy, HIV-related neuropathy, lumbar  
34  
35 radiculopathy, post-herpetic neuralgia, and chronic postsurgical pain. We included RCTs  
36  
37 irrespective of study size and duration of intervention. If we included RCTs with a cross-over  
38  
39 design, we used data from the first phase of the study. We excluded phase IV trials because  
40  
41 they are typically unblinded. We also excluded studies that combined pregabalin with other  
42  
43 types of pain intervention because the effects of such interventions would not be exclusively  
44  
45 due to the actions of pregabalin; however, co-interventions used as rescue medication were  
46  
47 allowed. Trials that randomized participants based on response to pregabalin therapy in the  
48  
49 run-in phase were also excluded. Our main outcomes were pain (as measured using validated  
50  
51 scales because such scales enhance the credibility of the measured outcomes<sup>12</sup>) and adverse  
52  
53 events. Our secondary outcomes were sleep disturbance, quality of life (QOL), patient global  
54  
55  
56  
57  
58  
59  
60

1  
2  
3 impression of change (PGIC), clinician global impression (CGI) scale, anxiety and  
4  
5 depression, overall discontinuations and discontinuations because of adverse events.  
6  
7  
8  
9

10 The risk of bias for each included study was rated using the Cochrane criteria.<sup>13</sup> Two  
11  
12 reviewers (IJO and ETT) independently screened abstracts and determined study eligibility.  
13  
14 Disagreements were resolved through discussion. Three reviewers (IJO (8 studies), ETT (8  
15  
16 studies) and JL (10 studies)) independently extracted data according to pre-defined criteria  
17  
18 into customized excel spreadsheets. The extracted data were independently verified by two  
19  
20 reviewers (ETT and IJO). Any disagreements were resolved through discussion. For each  
21  
22 included study, we extracted data on study ID, settings, populations, interventions, outcomes  
23  
24 and results.  
25  
26  
27  
28  
29

30 Using the random effects model (Mantel-Haenszel) of the standard meta-analysis software  
31  
32 (RevMan 5.3),<sup>14</sup> we computed standardized mean differences (SMDs) and 95% confidence  
33  
34 intervals (CIs) for continuous outcomes and risk ratios with 95% CI for binary outcomes. We  
35  
36 used pre- to post-intervention changes to assess intervention effects between pregabalin and  
37  
38 placebo. Where studies reported data on change from baseline but did not report standard  
39  
40 deviations (SDs), we imputed SDs (five studies) based on the SD of other studies included in  
41  
42 the meta-analysis.<sup>15</sup> We used a value of  $P=0.05$  as our threshold for statistical significance.  
43  
44  
45 We assessed heterogeneity using the I-squared statistic: values of 25%, 50% and 75% judged  
46  
47 mild, moderate and substantial heterogeneity respectively. We investigated heterogeneity  
48  
49 using subgroup (based on central or peripheral neuropathic pain) and sensitivity (based on  
50  
51 study quality and/or duration) analyses. We used a funnel plot to assess publication bias.  
52  
53  
54  
55  
56  
57  
58  
59  
60

1  
2  
3 One reviewer (ETT) entered the data on benefits on RevMan, and these were independently  
4 verified by a second reviewer (IJO). One reviewer (IJO) entered the data on harms onto  
5 RevMan, and these were independently verified by a second reviewer (ETT). Using the  
6 GRADEpro software (version 3.6),<sup>16</sup> we rated the overall quality of the body of evidence for  
7 each outcome using the Grading of Recommendation, Assessment, Development, and  
8 Evaluation (GRADE)<sup>17</sup> criteria which examines the following domains: study design; risk of  
9 bias; inconsistency; indirectness; and imprecision.  
10  
11  
12  
13  
14  
15  
16  
17  
18  
19  
20  
21

### 22 **Patient public involvement**

23 Because this was a rapid review, we did not enlist the services of patient representatives in  
24 this research.  
25  
26  
27  
28  
29

### 30 **RESULTS**

31 Our searches identified 1349 non-duplicate citations, out of which 62 articles were  
32 considered eligible (Figure 1). We excluded 34 articles that did not fit our inclusion criteria.  
33 [See Appendix 3 for list of excluded studies and the reasons for exclusion]. In total, we  
34 included 28 studies<sup>18, 19, 20, 21, 22, 23, 24, 25, 26, 27, 28, 29, 30, 31, 32, 33, 34, 35, 36, 37, 38, 39, 40, 41, 42, 43, 44, 45</sup>  
35 comprising 6087 participants (Table 1). The intervention duration was between three and 20  
36 weeks (median 8 weeks) and all the trials were industry funded.  
37  
38  
39  
40  
41  
42  
43  
44  
45  
46  
47  
48

49 Twenty three studies examined the effectiveness of pregabalin in treatment of peripheral  
50 neuropathic pain including DPN, PHN and Herpes zoster (HZ) (Table 1). Five studies  
51 examined the effectiveness of pregabalin for treating central neuropathic pain including  
52 sciatica (radicular pain), post-stroke pain and spinal cord injury-related pain. Twenty five  
53 studies were conducted in two or more centres. Outcome measures for pain included  
54  
55  
56  
57  
58  
59  
60

1  
2  
3 numerical rating scale (NRS), visual assessment scale (VAS), Short-Form McGill Pain  
4  
5 Questionnaire visual assessment scale (SF-MPQ VAS), and SF-MPQ personal pain intensity  
6  
7 (SF-MPQ PPI) index [see Table 1 for full characteristics of included studies]. The overall risk  
8  
9 of bias in the included studies was moderate to high (Figures 2 and 3). This was mainly due  
10  
11 to inadequate reporting of blinding procedures, selective outcome reporting and financial  
12  
13 conflicts of interest amongst study authors. [See appendix 4 for the risk of bias judgements].  
14  
15  
16  
17

## 18 19 **Pain**

20  
21 Twenty one studies provided adequate data on pain using the NRS or variants of it to allow  
22  
23 meta-analysis. Meta-analysis showed a significant reduction in pain scores with pregabalin  
24  
25 compared with placebo, SMD -0.49 (95% CI -0.66 to -0.32,  $P < 0.00001$ ,  $I^2 = 88\%$ ; Figure 4).  
26  
27 Visual inspection of a funnel plot showed that the studies were almost symmetrically  
28  
29 distributed around the mean difference for all trials (Figure S1); trim and fill analyses showed  
30  
31 that the subsequent addition of studies with smaller sample sizes did not change the direction  
32  
33 of effect. The effect was significant for peripheral neuropathic pain ( $P < 0.00001$ ), but not for  
34  
35 central neuropathic pain ( $P = 0.08$ ; Appendix table 1). The overall quality of the evidence was  
36  
37 very low (Summary of Findings (SoF) Table 1). Sensitivity analyses revealed similar  
38  
39 direction of effects (Appendix Table 2). Four studies that measured pain using NRS did not  
40  
41 provide adequate data for meta-analysis; three of these reported significant reductions in pain  
42  
43 scores favouring pregabalin over placebo, while one reported no significant difference  
44  
45 between groups (See Appendix Table 3).  
46  
47  
48  
49  
50  
51

52  
53 Three studies measured pain using the VAS, and all showed significant reduction in pain  
54  
55 scores favouring pregabalin over placebo (Appendix Table 3). Nine studies measured pain  
56  
57 using SF-MPQ VAS, and all reported significant reduction in pain scores favouring  
58  
59  
60

1  
2  
3 pregabalin over placebo. Four studies measured pain using SF-MPQ PPI index, and all  
4  
5 reported significant reduction in pain scores favouring pregabalin over placebo.  
6  
7  
8  
9  
10  
11  
12  
13  
14  
15  
16  
17  
18  
19  
20  
21  
22  
23  
24  
25  
26  
27  
28  
29  
30  
31  
32  
33  
34  
35  
36  
37  
38  
39  
40  
41  
42  
43  
44  
45  
46  
47  
48  
49  
50  
51  
52  
53  
54  
55  
56  
57  
58  
59  
60

For peer review only

**Table 1: Main characteristics of RCTs assessing the effects of pregabalin in the management of central and peripheral neuropathic pain**

| Study ID             | Design         | Sample size      | Duration | Setting                                                                                               | Population                                                                                  | Duration of neuropathic pain         | Outcome measures                                                                                                                                                                                                                                                                                                                                                                                                                                                                                                                                               | Interventions                                            |                                                                                                                  |                                                                                                                                                                                                                                                                                                              |
|----------------------|----------------|------------------|----------|-------------------------------------------------------------------------------------------------------|---------------------------------------------------------------------------------------------|--------------------------------------|----------------------------------------------------------------------------------------------------------------------------------------------------------------------------------------------------------------------------------------------------------------------------------------------------------------------------------------------------------------------------------------------------------------------------------------------------------------------------------------------------------------------------------------------------------------|----------------------------------------------------------|------------------------------------------------------------------------------------------------------------------|--------------------------------------------------------------------------------------------------------------------------------------------------------------------------------------------------------------------------------------------------------------------------------------------------------------|
|                      |                |                  |          |                                                                                                       |                                                                                             |                                      |                                                                                                                                                                                                                                                                                                                                                                                                                                                                                                                                                                | Pregabalin                                               | Placebo                                                                                                          | Co-interventions                                                                                                                                                                                                                                                                                             |
| Arezzo 2008 [18]     | Parallel-group | PGB 82; PLA 85   | 13 weeks | 23 centres; USA                                                                                       | Men or women with T1DM or T2DM                                                              | ≥3 months                            | <b>Primary:</b> Mean pain scores (MPS); proportion of responders; Adverse events ≥3% <b>Secondary:</b> Sleep interference (11 point NRS), Present pain intensity (PPI) index; SF-MPQ VAS; CGIC; PGIC                                                                                                                                                                                                                                                                                                                                                           | 600 mg/d Fixed                                           | Not described                                                                                                    | Aspirin (up to 325 mg/d for cardiac and stroke prophylaxis), acetaminophen (up to 4 g/d), SSRIs, and benzodiazepines such as lorazepam (dosed at bedtime with stable [>30 days] regimen for sleep problems) were allowed.                                                                                    |
| Cardenas 2013 [19]   | Parallel-group | PGB 112; PLA 108 | 16 weeks | 60 centres; Chile, China, Columbia, Czech Republic, Hong Kong, India, Japan, Philippines, Russia, USA | Patients aged ≥18 years with C2-T12 complete/incomplete SCI                                 | ≥ 12 months                          | <b>Primary:</b> Duration-adjusted average change in pain (DAAC); <b>Secondary:</b> Change in mean pain score (from baseline to endpoint); Percentage of patients with ≥/≤30% reduction in mean pain score at end point; PGIC scores at endpoint; change in mean pain-related sleep interference score; change from baseline in mean pain at each study week; change from baseline in pain-related sleep interference scores at each week; Medical Outcomes Study-Sleep Scale (MOS-SS); Hospital Anxiety and Depression scale scores (at baseline and endpoint) | 150-600mg/d Flexible phase followed by maintenance phase | Matching grey capsule                                                                                            | Nonsteroidal anti-inflammatory drugs, cyclo-oxygenase-2 inhibitors, and acetaminophen (≤1.5 g/d in Japan, ≤4 g/d in all other countries) were permitted as rescue therapy. Antidepressants were permitted if the patient was on a stable dose within 30 days before the first visit.                         |
| Dworkin 2003 [20]    | Parallel-group | PGB 89; PLA 84   | 8 weeks  | 29 centres; USA                                                                                       | Men or women ≥18 years old with post-herpetic neuralgia                                     | ≥3 months                            | <b>Primary:</b> Pain reduction in last 24 hours; Safety and adverse events <b>Secondary:</b> SF-MPQ at baseline, weeks 1,3,5,8; daily sleep interference score; MOS-SS; SF-36; PGIC; CGIC                                                                                                                                                                                                                                                                                                                                                                      | 300mg/d, 600mg/d Fixed                                   | Identical in appearance; administered 1 capsule three times daily                                                | Permitted medications included narcotic and non-narcotic analgesics, acetaminophen (not to exceed 4g/day), nonsteroidal anti-inflammatory drugs, aspirin, and antidepressants, including selective serotonin reuptake inhibitors (provided that dosing had been stable for at least 30 days before baseline) |
| Freynhagen 2005 [21] | Parallel-group | PGB 273; PLA 65  | 12 weeks | 60 centres; 9 European countries that were not specified                                              | Men or women ≥18 years old with primary diagnosis of painful DPN or post-herpetic neuralgia | ≥3 months PHN, ≥6 months DPN         | <b>Primary:</b> Mean Pain Score; adverse events; <b>Secondary:</b> daily sleep interference diary; MOS-SS; PGIC                                                                                                                                                                                                                                                                                                                                                                                                                                                | 150-600mg/d Flexible; 300mg/d, 600mg/d Fixed             | Matching capsules; matching twice daily dosing schedule                                                          | SSRIs for treatment of depression, aspirin for myocardial infarction and stroke prophylaxis, short-acting benzodiazepines for insomnia, and paracetamol as rescue medication were allowable medications during the study period.                                                                             |
| Guan 2011 [22]       | Parallel-group | PGB 206; PLA 102 | 8 weeks  | 11 centres; China                                                                                     | Males or females 18-75 years with primary diagnosis of painful DPN or PHN                   | ≥3 months PHN, ≥1 year, <5 years DPN | <b>Primary:</b> Mean Pain score (DPRS) during preceding 24h; DAAC score; <b>Secondary:</b> Daily sleep interference scale; SF-MPQ; PGIC; CGIC; Safety and adverse events                                                                                                                                                                                                                                                                                                                                                                                       | 150-600mg/d Flexible                                     | Flexible dose placebo in matching capsules; doses titrated using same regimen                                    | NSAIDs and SSRIs allowed to be continued on stable dose                                                                                                                                                                                                                                                      |
| Holbech 2015 [23]    | Cross-over     | PGB 18; PLA 19   | 5 weeks  | 3 centres; Denmark                                                                                    | Males or females 20-85 years with polyneuropathy due to DPN                                 | ≥6 months                            | <b>Primary:</b> Total pain intensity on NRS; adverse events; <b>Secondary:</b> pain-related sleep disturbances; pain relief on 6-point verbal scale; <b>Other:</b> specific pain symptoms on the NRS; number of paracetamol tablets used as escape medication; SF-36 (health related QoL); Major Depression Inventory; QST tests                                                                                                                                                                                                                               | 150mg/d, 300mg/d Fixed                                   | Matched placebos of identical appearance to the 2 trial drugs were dosed similarly using double-dummy technique. | Up to 6 tablets of 500 mg paracetamol could be used daily as escape medication                                                                                                                                                                                                                               |
| Huffman 2015 [24]    | Cross-over     | PGB 101; PLA 102 | 6 weeks  | 36 centres; USA (25), Sweden (4), South Africa (4), Czech Republic (3)                                | Men or women ≥18 years old with painful DPN and with pain on walking                        | Not described                        | <b>Primary:</b> Numeric Rating Scale (NRS); DPN Pain on Walking (NRS); <b>Secondary:</b> 30%, 50% responders; Brief Pain Inventory-Short Form (BPI-sf); Daytime Total Activity Counts per Day; Steps per Day; Walk 12 questionnaire; Norfolk Quality of Life-Diabetic Neuropathy (Norfolk QOL-DN) Total Quality of Life (TQOL) Score; Euro QoL-5 Dimensions (EQ-5D); Mean Sleep Interference Rating Score; HADS                                                                                                                                                | 150-300 mg/day Fixed                                     | Matching placebo also administered in 3 divided doses                                                            | Not described                                                                                                                                                                                                                                                                                                |

1  
2  
3  
4  
5  
6  
7  
8  
9  
10  
11  
12  
13  
14  
15  
16  
17  
18  
19  
20  
21  
22  
23  
24  
25  
26  
27  
28  
29  
30  
31  
32  
33  
34  
35  
36  
37  
38  
39  
40  
41  
42  
43  
44  
45  
46  
47  
48  
49  
50  
51  
52  
53  
54  
55  
56  
57  
58  
59  
60

|                              |                |                  |          |                                 |                                                                                                                                                |                                                                     |                                                                                                                                                                                                                                                                                                                                                                                                  |                                                                 |                                                                                                   |                                                                                                                                                                                                                                                                                                                                                                                                                                                                                                                                 |
|------------------------------|----------------|------------------|----------|---------------------------------|------------------------------------------------------------------------------------------------------------------------------------------------|---------------------------------------------------------------------|--------------------------------------------------------------------------------------------------------------------------------------------------------------------------------------------------------------------------------------------------------------------------------------------------------------------------------------------------------------------------------------------------|-----------------------------------------------------------------|---------------------------------------------------------------------------------------------------|---------------------------------------------------------------------------------------------------------------------------------------------------------------------------------------------------------------------------------------------------------------------------------------------------------------------------------------------------------------------------------------------------------------------------------------------------------------------------------------------------------------------------------|
| 3 Kanodia 2011 [25]          | Parallel-group | PGB 23; PLA 22   | 4 weeks  | 1 centre; India                 | Patients with acute herpes zoster presenting within 72 hours of onset                                                                          | < 3 days                                                            | <b>Primary:</b> Pain on linear VAS; Adverse events                                                                                                                                                                                                                                                                                                                                               | 150mg/d Fixed                                                   | Not described                                                                                     | Oral acyclovir 800mg was given 5 times per day for 7 days                                                                                                                                                                                                                                                                                                                                                                                                                                                                       |
| 6 Kim 2011 [26]              | Parallel-group | PGB 110; PLA 109 | 12 weeks | 32 centres; Asia-Pacific        | Males or females $\geq 18$ years with diagnosis of central post-stroke pain                                                                    | $\geq 3$ months                                                     | <b>Primary:</b> Mean pain score; <b>Secondary:</b> Daily sleep interference scale (DSIS); Weekly mean pain scores; proportion of 30%, 50% responders; quantitative assessment of Neuropathic pain (QANeP); Neuropathic Pain Symptom Inventory (NPSI); Weekly mean sleep interference scores; MOS-SS; HADS; SF-MPQ VAS- Part B; Euro Quality of Life (EQ-5D); PGIC; CGIC; Safety and tolerability | 300,600mg/d Dose adjustment followed by fixed maintenance phase | Matching placebo                                                                                  | Stable medications for pain or insomnia if used normally $>30$ days before screening                                                                                                                                                                                                                                                                                                                                                                                                                                            |
| 16 Krcovski Skvarc 2010 [27] | Parallel-group | PGB 14; PLA 15   | 3 weeks  | 1 centre; Slovenia              | Men or women 30-80 years with herpes zoster pain.                                                                                              |                                                                     | <b>Primary:</b> Assessment of pain severity (11 point Likert scale); <b>Secondary:</b> patients' ratings of the severity of allodynia, hyperalgesia, and burning, prickling and tingling sensations; rating of quality of sleep and physical activity; consumption of analgesics; occurrence of adverse events; SHN; PHN                                                                         | 150 or 300mg/d Fixed                                            | Placebo also administered twice daily                                                             | Oxycodone, naproxen and/or tramadol, morphine, diclofenac                                                                                                                                                                                                                                                                                                                                                                                                                                                                       |
| 25 Esser 2004 [28]           | Parallel-group | PGB 240; PLA 97  | 5 weeks  | 45 centres; USA                 | Men or women $\geq 18$ years old who were diagnosed with diabetes mellitus (type 1 or 2) and had distal symmetric sensorimotor polyneuropathy. | 1-5 years                                                           | <b>Primary:</b> Pain (11-point NRS); <b>Secondary:</b> daily sleep interference diary; SF-MPQ; CGIC; PGIC; SF-36; POMS; <b>Safety outcomes</b>                                                                                                                                                                                                                                                   | 75, 300, 600mg/d Fixed                                          | Placebo administered three times daily                                                            | Acetaminophen and SSRIs permitted                                                                                                                                                                                                                                                                                                                                                                                                                                                                                               |
| 31 Liu 2015 [29]             | Parallel-group | PGB 112; PLA 110 | 8 weeks  | 22 centres; China               | Male and female ethnically Chinese patients aged $\geq 18$ , diagnosed with post-herpetic neuralgia                                            | Symptoms persisting $\geq 3$ months after the healing of HZ lesions | <b>Primary:</b> Mean score of Daily Pain Rating Score; <b>Secondary:</b> Change from baseline on Pain VAS; Change from baseline on Present Pain Intensity (PPI) of the SF-MPQ; 30% pain responders at endpoint; change from baseline in weekly mean pain score; change from baseline in sleep interference score (11-point NRS); CGIC; PGIC; MOS-SS; Adverse events                              | 150mg/d, 300mg/d Fixed                                          | Matched placebo capsules on the same dosing schedule                                              | Concomitant use of medications permitted except antidepressants, epileptics, analgesics or corticosteroids, skeletal muscle relaxants, mexiletine, and dextromethorphan as well as electrotherapy, transcutaneous electrical nerve stimulation, acupuncture, and neurosurgical therapy.                                                                                                                                                                                                                                         |
| 37 Mathieson 2017 [30]       | Parallel-group | PGB 108; PLA 101 | 8 weeks  | Number not specified; Australia | Patients with sciatica                                                                                                                         | $\geq 1$ week, $< 1$ year                                           | <b>Primary:</b> Average leg-pain intensity score over the course of previous 24 hours as assessed at 8 weeks and 52 weeks; <b>Secondary:</b> extent of disability (Roland Disability Questionnaire for sciatica); back pain intensity; global perceived effect; Quality of Life as measured on Short Form Health Survey 12; adverse events                                                       | 150-600mg/d Flexible                                            | Matching placebo capsules were packaged in white, opaque, sealed containers at a central pharmacy | Concomitant therapies included physical therapies as well as other analgesic medications (except for adjuvant analgesic agents), which would ideally be prescribed in accordance with the World Health Organization pain ladder. Trial clinicians were asked not to prescribe certain medicines (antiepileptic medications, selective serotonin reuptake inhibitors, serotonin-norepinephrine reuptake inhibitors, tricyclic antidepressants, topical lidocaine, and benzodiazepines) or to schedule interventional procedures. |

1  
2  
3  
4  
5  
6  
7  
8  
9  
10  
11  
12  
13  
14  
15  
16  
17  
18  
19  
20  
21  
22  
23  
24  
25  
26  
27  
28  
29  
30  
31  
32  
33  
34  
35  
36  
37  
38  
39  
40  
41  
42  
43  
44  
45  
46  
47  
48  
49  
50  
51  
52  
53  
54  
55  
56  
57  
58  
59  
60

|                         |                |                  |                                   |                                                                                      |                                                                                                                                                                                     |                                                                                                   |                                                                                                                                                                                                                                                                                                                                                                                                                                                                                                                                                                                                                                                                                                                                                                                                                    |                        |                                                                                 |                                                                                                                                                                                                                                                                               |
|-------------------------|----------------|------------------|-----------------------------------|--------------------------------------------------------------------------------------|-------------------------------------------------------------------------------------------------------------------------------------------------------------------------------------|---------------------------------------------------------------------------------------------------|--------------------------------------------------------------------------------------------------------------------------------------------------------------------------------------------------------------------------------------------------------------------------------------------------------------------------------------------------------------------------------------------------------------------------------------------------------------------------------------------------------------------------------------------------------------------------------------------------------------------------------------------------------------------------------------------------------------------------------------------------------------------------------------------------------------------|------------------------|---------------------------------------------------------------------------------|-------------------------------------------------------------------------------------------------------------------------------------------------------------------------------------------------------------------------------------------------------------------------------|
| 3 Moon 2010 [31]        | Parallel-group | PGB 162; PLA 78  | 10 weeks                          | Multicentre (number not specified); Korea                                            | Korean patients aged 18 years with neuropathic pain (diabetic peripheral neuropathy, postherpetic neuralgia, or posttraumatic neuropathic pain)                                     | Mean duration of pain pregabalin patients- 3 years, placebo patients 3.2 years                    | <b>Primary:</b> Endpoint mean DPRS score, Secondary: weekly mean DPRS score, duration adjusted average change (DAAC) of adjusted mean DPRS from baseline to endpoint, proportion of responders (whose scores reduced by 30% or 50%), Daily Sleep Interference Scale (DSIS), Euro Quality of Life assessment (EQ-5D); utility and VAS score; MOS-SS; HADS; PGIC; CGIC; <b>Tolerability evaluation</b> of adverse events and vital signs                                                                                                                                                                                                                                                                                                                                                                             | 150-600mg/d Flexible   | Matching placebo capsules provided by Pfizer                                    | Most patients were taking drug therapy at baseline, and the majority (83.8%) remained on concomitant drug therapy during the study, including one-third who received tricyclic antidepressants.                                                                               |
| 14 Rauck 2013 [32]      | Parallel-group | PGB 56; PLA 112  | 20 weeks                          | 85 centres; USA                                                                      | Men or women ≥18 years old who were diagnosed with diabetes mellitus (type 1 or 2) and had pain attributed to DPN, defined as painful distal symmetric sensorimotor polyneuropathy. | ≥6 months, <5 years                                                                               | <b>Primary:</b> Change from baseline in pain intensity score (11 point PI-NRS); <b>Secondary:</b> Change from baseline in mean 24-hour average pain intensity score, daytime average pain intensity score, nighttime average pain intensity score, current pain intensity score, daytime worst pain intensity score, nighttime worst pain intensity score, sleep interference score, and rescue analgesia consumption (mg); Neuropathic Pain Scale (NPS); SF-MPQ; pre- and post-50-foot (15 meter) walk pain scores; PGIC; CGIC; proportion of subjects achieving various levels of reduction in the 24-hour average pain intensity score; time to onset of sustained improvement in the 24-hour average pain intensity score; POMS; SF-36 health-related quality of life questionnaire; <b>Safety assessments</b> | 300mg/d Fixed          | Matching placebo in blister card                                                | Acetaminophen, up to 3 g/day, was allowed as rescue medication for pain throughout the trial but was not allowed within 24 hours of any site visit for assessments.                                                                                                           |
| 24 Richter 2005 [33]    | Parallel-group | PGB 161; PLA 85  | 6 weeks                           | Multicentre; not specified                                                           | Patients with diabetes and painful distal symmetrical sensorimotor polyneuropathy                                                                                                   | 1-5 years                                                                                         | <b>Primary:</b> Pain; Adverse events; <b>Secondary:</b> Pain characteristics (SF-MPQ, PPI); sleep interference (11 point NRS 0 to 10); health status (SF-36); psychologic state (POMS); global improvement (PGIC, CGIC)                                                                                                                                                                                                                                                                                                                                                                                                                                                                                                                                                                                            | 150mg/d, 600mg/d Fixed | Matching dose and schedule                                                      | Aspirin (for prophylaxis of myocardial infarction and transient ischemic attacks), acetaminophen (3 g/day), and stable doses of serotonin reuptake inhibitors were allowed.                                                                                                   |
| 28 Rosenstock 2004 [34] | Parallel-group | PGB 76; PLA 70   | 8 weeks                           | 25 centres                                                                           | Men or women ≥18 years old with type 1 or 2 diabetes mellitus who reported symmetrical painful symptoms in distal extremities for a period of 1-5 years prior to study              | 1-5 years                                                                                         | <b>Primary:</b> Endpoint mean score <b>Secondary:</b> SF-MPQ-Sensory, affective and total score; daily sleep interference score; PGIC; CGIC; SF-36; Profile of Mood States (POMS); <b>Safety</b>                                                                                                                                                                                                                                                                                                                                                                                                                                                                                                                                                                                                                   | 300mg/d Fixed          | Lactose USP, 1 capsule three times daily                                        | Acetaminophen (up to 4 g/day), aspirin (up to 325 mg/day for myocardial infarction or transient ischemic attack prophylaxis), and serotonin reuptake inhibitors provided no dose changes occurred within 30 days prior to randomization or during the study)                  |
| 32 Sabatowski 2004 [35] | Parallel-group | PGB 157; PLA 81  | 8 weeks                           | 53 centres; Europe, Australia                                                        | Men or women ≥18 years old with post-herpetic neuralgia                                                                                                                             | ≥6 months                                                                                         | <b>Primary:</b> Endpoint mean score; <b>Secondary:</b> mean sleep interference scores, PGIC, CGIC, SF-36 health survey, Zung Self-Rating Depression Scale, VAS of the SF-MPQ, <b>Adverse events</b>                                                                                                                                                                                                                                                                                                                                                                                                                                                                                                                                                                                                                | 150mg/d, 300mg/d Fixed | Identical in appearance                                                         | Patients allowed to continue acetaminophen (up to 3 g/day), non-steroidal anti-inflammatory drugs, opioid or non-opioid analgesics, or antidepressants.                                                                                                                       |
| 37 Satoh 2011 [36]      | Parallel-group | PGB 179; PLA 90  | 13 weeks<br>**intervention period | 62 centres; Japan                                                                    | Men or women ≥18 years old with diabetic peripheral neuropathy                                                                                                                      | ≥ 1 year                                                                                          | <b>Primary:</b> Change from baseline in mean weekly pain score at week 13 using a 11 point NRS; <b>Secondary:</b> weekly mean pain scores, responder rates, SF-MPQ score, weekly mean sleep interference scores using 11-point NRS; MOS-Sleep Scale, SF-36, PGIC, CGIC, <b>Safety:</b> Adverse events.                                                                                                                                                                                                                                                                                                                                                                                                                                                                                                             | 300mg/d, 600mg/d Fixed | Not described, same schedule                                                    | Not described                                                                                                                                                                                                                                                                 |
| 44 Shabbir 2011 [37]    | Parallel-group | PGB 70; PLA 70   | 6 weeks                           | 2 centres; Mayo Hospital and Services Hospital, Lahore.                              | Men or women ≥18 years old with diabetic peripheral neuropathy                                                                                                                      | ≥6 months                                                                                         | <b>Primary:</b> Reduction in pain (measured with NRS); responders who experienced 50% or more reduction in baseline pain score on NRS                                                                                                                                                                                                                                                                                                                                                                                                                                                                                                                                                                                                                                                                              | 150-600mg/d Flexible   | Not described                                                                   | Not described                                                                                                                                                                                                                                                                 |
| 48 Siddall 2006 [38]    | Parallel-group | PGB 70; PLA 67   | 12 weeks                          | 8 centres; Australia                                                                 | Patients with central neuropathic pain in spinal cord injury                                                                                                                        | Persisted continuously for at least 3 months or with relapses and remission for at least 6 months | <b>Primary:</b> Endpoint mean pain scores, Sleep-interference scores, SF-MPQ Total, sensory and affective scores, from which VAS and PPI score was derived. MOS-sleep scale and HADS, PGIC; <b>Tolerability and safety</b>                                                                                                                                                                                                                                                                                                                                                                                                                                                                                                                                                                                         | 150-600mg/d Flexible   | Placebo also administered twice daily                                           | 70% of patients taking other medications too: opiates, tricyclics, AEDs, NSAIDs/Cox2, Benzos, SSRI/SSNI, Muscle relaxants.                                                                                                                                                    |
| 53 Simpson 2010 [39]    | Parallel-group | PGB 151; PLA 151 | 14 weeks                          | 44 centres; USA, Puerto Rico                                                         | Men or women ≥18 years old with painful HIV-DSP                                                                                                                                     | ≥ 3 months                                                                                        | <b>Primary:</b> Change from baseline in mean NPRS score; <b>Secondary:</b> change in sleep interference scores; MOS-Sleep Scale; PGIC; Pain- modified Brief Pain Inventory; Gracely Pain Scale (GPS); <b>Safety:</b> adverse events                                                                                                                                                                                                                                                                                                                                                                                                                                                                                                                                                                                | 150-600mg/d Flexible   | Placebo also administered twice daily                                           | Neurotoxic antiretroviral (ARV) drugs known to cause sensory neuropathy clinically similar to HIV-DSP must have been on stable doses for ≥3 months before screening. Doses of other pain medications had to be stable for ≥1 month before treatment and throughout the study. |
| 57 Simpson 2014 [40]    | Parallel-group | PGB 183; PLA 194 | 16 weeks                          | 45 centres; South Africa, USA, India, Columbia, Thailand, Peru, Puerto Rico, Poland. | Men and women ≥18 years of age with HIV neuropathy                                                                                                                                  | ≥ 3 months                                                                                        | <b>Primary:</b> Change in Pain scores (NRS); <b>Secondary:</b> PGIC/CGIC; Brief Pain Symptom Inventory short form (BPI-sf);MOS-SS; Pain-related sleep interference and overall sleep disturbance (NRS-Sleep scale); Safety                                                                                                                                                                                                                                                                                                                                                                                                                                                                                                                                                                                         | 150-600mg/d Flexible   | Matching placebo delivered through system for randomization and drug dispensing | NSAIDs, if taken at stable dose for ≥4 weeks before study, antidepressants without efficacy for neuropathic pain if taken at stable dose for ≥30 days before study [SSRIs, bupropion, trazodone], nonbenzodiazepine hypnotics no more than                                    |



1  
2  
3  
4  
5  
6  
7  
8  
9  
10  
11  
12  
13  
14  
15  
16  
17  
18  
19  
20  
21  
22  
23  
24  
25  
26  
27  
28  
29  
30  
31  
32  
33  
34  
35  
36  
37  
38  
39  
40  
41  
42  
43  
44  
45  
46  
47  
48  
49  
50  
51  
52  
53  
54  
55  
56  
57  
58  
59  
60

|                        |                |                  |          |                                                                                                                           |                                                                                                       |                 |                                                                                                                                                                                                                                                             |                                               |                                                                                          |                                                                                                                                                                                                                                                        |
|------------------------|----------------|------------------|----------|---------------------------------------------------------------------------------------------------------------------------|-------------------------------------------------------------------------------------------------------|-----------------|-------------------------------------------------------------------------------------------------------------------------------------------------------------------------------------------------------------------------------------------------------------|-----------------------------------------------|------------------------------------------------------------------------------------------|--------------------------------------------------------------------------------------------------------------------------------------------------------------------------------------------------------------------------------------------------------|
|                        |                |                  |          |                                                                                                                           |                                                                                                       |                 |                                                                                                                                                                                                                                                             |                                               |                                                                                          | once/week for sleep disturbance if clinically essential, rescue therapy of oral acetaminophen (max 3g/day), low dose ( $\leq 650$ mg/day) aspirin and stable antiretroviral treatment >8 weeks before study                                            |
| Stacey 2008 [41]       | Parallel-group | PGB 179; PLA 90  | 4 weeks  | 42 centres; United States, Germany, Italy, Spain, and United Kingdom                                                      | Men or women $\geq 18$ years old with post-herpetic neuralgia                                         | $\geq 3$ months | <b>Primary:</b> Pain reduction; time to onset of meaningful pain relief; <b>Secondary:</b> Daily sleep interference score; PGIC; VAS of the SF-MPQ; VAS anxiety; VAS allodynia; <b>Safety evaluation</b>                                                    | 150-600mg/d Flexible dose; 300mg/d Fixed dose | Placebo also administered twice daily                                                    | Concomitant pain treatments permitted given that it must be stable for at least 30 days                                                                                                                                                                |
| Colle 2008 [42]        | Parallel-group | PGB 299; PLA 96  | 12 weeks | 58 centres; Germany, Hungary, Poland, United Kingdom, Australia, and South Africa                                         | Men or women $\geq 18$ years old with painful symmetrical sensorimotor polyneuropathy due to diabetes | $\geq 1$ year   | <b>Primary:</b> Pain reduction (according to 11-point NRS) from baseline; treatment responders; <b>Secondary:</b> PGIC; CGIC; EuroQoL Health Utilities Index; Daily pain-related sleep-interference scores; EQ-5D (VAS); <b>Safety evaluation</b>           | 150, 300, 300/600mg/d Fixed                   | Placebo also administered twice daily                                                    | SSRIs for depression or anxiety given in a stable dose for >30 days                                                                                                                                                                                    |
| van Seventer 2006 [43] | Parallel-group | PGB 275; PLA 93  | 13 weeks | 76 centres                                                                                                                | Men or women $\geq 18$ years old with post-herpetic neuralgia                                         | >3 months       | <b>Primary:</b> Endpoint mean pain scores; patients with $\geq 50\%$ and $\geq 30\%$ reduction in pain score from baseline; weekly mean pain scores; <b>Secondary:</b> endpoint mean sleep-interference scores, weekly mean sleep-interference scores, PGIC | 150, 300, 600mg/d Fixed                       | Placebo also administered twice daily                                                    | non-narcotic analgesics, e.g., noramidopyrine and paracetamol, and stable regimens of opioids, anti-inflammatories, and antidepressants                                                                                                                |
| van Seventer 2010 [44] | Parallel-group | PGB 127; PLA 127 | 8 weeks  | 44 centres; Belgium, Canada, Denmark, Finland, Italy, Netherlands, Portugal, Romania, Sweden, Switzerland, United Kingdom | Men or women aged 18–80 with post-traumatic peripheral neuropathic pain                               | $\geq 3$ months | <b>Primary:</b> End-point mean pain score; <b>Secondary:</b> rating of extent to which pain interfered with sleep; MOS-SS; HADS; mBPI-sf; PGIC; <b>Tolerability and safety assessment</b>                                                                   | 150-600mg/d Flexible                          | Placebo also administered twice daily                                                    | NSAIDs, COX-2 inhibitors, opioid and non-opioid analgesics, anti-epileptic drugs, antidepressant medications, other concomitant medications if they had been stable for at least 1 month before the study and would remain stable throughout the study |
| Franken 2008 [45]      | Parallel-group | PGB 20; PLA 20   | 4 weeks  | 1 centre; Netherlands                                                                                                     | Men and women $\geq 18$ years old with central neuropathic pain                                       | $\geq 6$ months | <b>Primary:</b> Pain intensity score (VAS); Mean endpoint pain score; Pain Disability Index (PDI); EQ-5D; Medical Outcomes Short-form Health Survey questionnaire 36 (SF36); <b>Safety</b>                                                                  | 150-600mg/d Flexible                          | Flexible dose placebo (1-4 capsules per day); matching capsules; on same dosing schedule | Adjuvant analgesics                                                                                                                                                                                                                                    |

ABBREVIATIONS: CGIC: Clinician global impression of change; DPN: Diabetic peripheral neuropathy; PGB: Pregabalin; PGIC: Patient global impression of change; PLA: Placebo; SF-MPQ PPI: Short-Form McGill Pain Questionnaire *personal pain intensity*; SF-MPQ VAS: Short-Form McGill Pain Questionnaire visual assessment scale; VAS: Visual assessment scale

| Summary of Findings Table 1: Effect of pregabalin on NRS scores in patients with neuropathic pain                                                                                                                                                                                                                                                                                                                                                                                                                                                           |                                          |                                                                                                                                                                           |                          |                              |                                          |                            |
|-------------------------------------------------------------------------------------------------------------------------------------------------------------------------------------------------------------------------------------------------------------------------------------------------------------------------------------------------------------------------------------------------------------------------------------------------------------------------------------------------------------------------------------------------------------|------------------------------------------|---------------------------------------------------------------------------------------------------------------------------------------------------------------------------|--------------------------|------------------------------|------------------------------------------|----------------------------|
| <b>Patient or population:</b> patients with neuropathic pain<br><b>Settings:</b><br><b>Intervention:</b> Effect of pregabalin on pain                                                                                                                                                                                                                                                                                                                                                                                                                       |                                          |                                                                                                                                                                           |                          |                              |                                          |                            |
| Outcomes                                                                                                                                                                                                                                                                                                                                                                                                                                                                                                                                                    | Illustrative comparative risks* (95% CI) |                                                                                                                                                                           | Relative effect (95% CI) | No of Participants (studies) | Quality of the evidence (GRADE)          | Comments                   |
|                                                                                                                                                                                                                                                                                                                                                                                                                                                                                                                                                             | Assumed risk<br>Control                  | Corresponding risk<br>Effect of pregabalin in pain                                                                                                                        |                          |                              |                                          |                            |
| Mean Pain Score                                                                                                                                                                                                                                                                                                                                                                                                                                                                                                                                             |                                          | The mean pain score in the intervention groups was <b>0.49 standard deviations lower</b> (0.66 to 0.32 lower)                                                             |                          | 5093 (21 studies)            | ⊕⊕⊕⊕<br><b>very low</b> <sup>1,2</sup>   | SMD -0.49 (-0.66 to -0.32) |
| Mean Pain Score - Central neuropathic pain (including sciatica (radicular pain))                                                                                                                                                                                                                                                                                                                                                                                                                                                                            |                                          | The mean mean pain score - central neuropathic pain (including sciatica) in the intervention groups was <b>0.38 standard deviations lower</b> (0.8 lower to 0.04 higher)  |                          | 785 (4 studies)              | ⊕⊕⊕⊕<br><b>very low</b> <sup>2,3,4</sup> | SMD -0.38 (-0.8 to 0.04)   |
| Mean Pain Score - Peripheral neuropathic pain (includes PDN, HZ & PHN)                                                                                                                                                                                                                                                                                                                                                                                                                                                                                      |                                          | The mean mean pain score - peripheral neuropathic pain (includes pdn, hz & phn) in the intervention groups was <b>0.52 standard deviations lower</b> (0.71 to 0.33 lower) |                          | 4308 (17 studies)            | ⊕⊕⊕⊕<br><b>very low</b> <sup>1,2</sup>   | SMD -0.52 (-0.71 to -0.33) |
| *The <b>corresponding risk</b> (and its 95% confidence interval) is based on the assumed risk in the comparison group and the <b>relative effect</b> of the intervention (and its 95% CI).<br>CI: Confidence interval; <b>NRS</b> : Numerical rating scale; <b>SMD</b> : Standard mean deviation; <b>PDN</b> : Painful diabetic neuropathy; <b>HZ</b> : Herpes zoster; <b>PHN</b> : Post-herpetic neuralgia                                                                                                                                                 |                                          |                                                                                                                                                                           |                          |                              |                                          |                            |
| GRADE Working Group grades of evidence<br><b>High quality:</b> Further research is very unlikely to change our confidence in the estimate of effect.<br><b>Moderate quality:</b> Further research is likely to have an important impact on our confidence in the estimate of effect and may change the estimate.<br><b>Low quality:</b> Further research is very likely to have an important impact on our confidence in the estimate of effect and is likely to change the estimate.<br><b>Very low quality:</b> We are very uncertain about the estimate. |                                          |                                                                                                                                                                           |                          |                              |                                          |                            |
| <sup>1</sup> Inconsistency in allocation concealment and blinding, selective reporting, authors had financial ties to industry sponsor<br><sup>2</sup> Substantial heterogeneity<br><sup>3</sup> Industry-sponsored, selective reporting<br><sup>4</sup> Wide confidence interval                                                                                                                                                                                                                                                                           |                                          |                                                                                                                                                                           |                          |                              |                                          |                            |

### Adverse events

Figure 5 shows that pregabalin was significantly more likely to cause adverse events compared with placebo, RR 1.33 (95% CI 1.23 to 1.44,  $P < 0.00001$ ,  $I^2 = 52\%$ ). This translates into an absolute effect of 145 (95% CI 101 to 194) more adverse events per 1000 treated. The overall quality of the evidence was low (SoF Table 2). Sensitivity analyses revealed similar direction of effects (Appendix Table 2). The risk of experiencing individual adverse events of weight gain, somnolence, dizziness, peripheral oedema, fatigue, visual disturbances, ataxia, non-peripheral oedema, dry mouth, vertigo and euphoria were significantly increased with pregabalin compared with placebo (see Appendix Table 1 and Figures S2 to S12). Pregabalin was also significantly more likely to cause discontinuation because of adverse events (RR 1.91, 95% CI 1.54 to 2.37,  $P < 0.00001$ ,  $I^2 = 0\%$ ); the quality of the evidence was low (SoF Table 2; Appendix Table 1; and Figure S13). Sensitivity analyses by study duration revealed similar direction of effects, but there was no significant difference with higher quality studies (Appendix Table 2).

There was no significant difference in the risk of serious adverse events (RR 0.9; 95% CI 0.66 to 1.24,  $P = 0.50$ ,  $I^2 = 0\%$ ; SoF Table 2; Appendix Table 1; and Figure S14); the quality of the evidence was moderate. Sensitivity analyses showed a significant effect in favour on pregabalin with three higher quality studies, but there was no difference based on study duration (Appendix Table 2). In total, six deaths were reported across four trials, five in pregabalin group and one in placebo: RR 0.86, 95% CI 0.18 to 4.06,  $P = 0.85$ ,  $I^2 = 0\%$ .

| <b>Summary of Findings Table 2: Effect of pregabalin on adverse events in patients with neuropathic pain</b>                                                                                                                                                                                                   |                                                 |                                                                  |                                  |                                     |                                        |                                    |
|----------------------------------------------------------------------------------------------------------------------------------------------------------------------------------------------------------------------------------------------------------------------------------------------------------------|-------------------------------------------------|------------------------------------------------------------------|----------------------------------|-------------------------------------|----------------------------------------|------------------------------------|
| <b>Patient or population:</b> patients with Neuropathic pain                                                                                                                                                                                                                                                   |                                                 |                                                                  |                                  |                                     |                                        |                                    |
| <b>Settings:</b>                                                                                                                                                                                                                                                                                               |                                                 |                                                                  |                                  |                                     |                                        |                                    |
| <b>Intervention:</b> Effect of pregabalin on adverse events                                                                                                                                                                                                                                                    |                                                 |                                                                  |                                  |                                     |                                        |                                    |
| <b>Outcomes</b>                                                                                                                                                                                                                                                                                                | <b>Illustrative comparative risks* (95% CI)</b> |                                                                  | <b>Relative effect (95% CI)</b>  | <b>No of Participants (studies)</b> | <b>Quality of the evidence (GRADE)</b> | <b>Number needed to harm (NNH)</b> |
|                                                                                                                                                                                                                                                                                                                | <b>Assumed risk Control</b>                     | <b>Corresponding risk Effect of pregabalin on adverse events</b> |                                  |                                     |                                        |                                    |
| <b>Adverse events</b>                                                                                                                                                                                                                                                                                          | <b>Study population</b>                         |                                                                  | <b>RR 1.33</b><br>(1.23 to 1.44) | 4010<br>(19 studies)                | ⊕⊕⊖⊖<br><b>low</b> <sup>1,2</sup>      | 6 (5 to 9)                         |
|                                                                                                                                                                                                                                                                                                                | <b>523 per 1000</b>                             | <b>696 per 1000</b><br>(643 to 753)                              |                                  |                                     |                                        |                                    |
|                                                                                                                                                                                                                                                                                                                | <b>Moderate</b>                                 |                                                                  |                                  |                                     |                                        |                                    |
|                                                                                                                                                                                                                                                                                                                | <b>440 per 1000</b>                             | <b>585 per 1000</b><br>(541 to 634)                              |                                  |                                     |                                        |                                    |
| <b>Discontinuations because of adverse events</b>                                                                                                                                                                                                                                                              | <b>Study population</b>                         |                                                                  | <b>RR 1.91</b><br>(1.54 to 2.37) | 5426<br>(24 studies)                | ⊕⊕⊖⊖<br><b>low</b> <sup>1,3</sup>      | 22 (15 to 37)                      |
|                                                                                                                                                                                                                                                                                                                | <b>51 per 1000</b>                              | <b>98 per 1000</b><br>(79 to 121)                                |                                  |                                     |                                        |                                    |
|                                                                                                                                                                                                                                                                                                                | <b>Moderate</b>                                 |                                                                  |                                  |                                     |                                        |                                    |
|                                                                                                                                                                                                                                                                                                                | <b>47 per 1000</b>                              | <b>90 per 1000</b><br>(72 to 111)                                |                                  |                                     |                                        |                                    |
| <b>Serious adverse events</b>                                                                                                                                                                                                                                                                                  | <b>Study population</b>                         |                                                                  | <b>RR 0.9</b><br>(0.66 to 1.24)  | 4272<br>(16 studies)                | ⊕⊕⊕⊖<br><b>moderate</b> <sup>1</sup>   | 289 (-121 to 85)                   |
|                                                                                                                                                                                                                                                                                                                | <b>35 per 1000</b>                              | <b>31 per 1000</b><br>(23 to 43)                                 |                                  |                                     |                                        |                                    |
|                                                                                                                                                                                                                                                                                                                | <b>Moderate</b>                                 |                                                                  |                                  |                                     |                                        |                                    |
|                                                                                                                                                                                                                                                                                                                | <b>20 per 1000</b>                              | <b>18 per 1000</b><br>(13 to 25)                                 |                                  |                                     |                                        |                                    |
| *The basis for the <b>assumed risk</b> (e.g. the median control group risk across studies) is provided in footnotes. The <b>corresponding risk</b> (and its 95% confidence interval) is based on the assumed risk in the comparison group and the <b>relative effect</b> of the intervention (and its 95% CI). |                                                 |                                                                  |                                  |                                     |                                        |                                    |
| <b>CI:</b> Confidence interval;                                                                                                                                                                                                                                                                                |                                                 |                                                                  |                                  |                                     |                                        |                                    |
| GRADE Working Group grades of evidence                                                                                                                                                                                                                                                                         |                                                 |                                                                  |                                  |                                     |                                        |                                    |
| <b>High quality:</b> Further research is very unlikely to change our confidence in the estimate of effect.                                                                                                                                                                                                     |                                                 |                                                                  |                                  |                                     |                                        |                                    |
| <b>Moderate quality:</b> Further research is likely to have an important impact on our confidence in the estimate of effect and may change the estimate.                                                                                                                                                       |                                                 |                                                                  |                                  |                                     |                                        |                                    |
| <b>Low quality:</b> Further research is very likely to have an important impact on our confidence in the estimate of effect and is likely to change the estimate.                                                                                                                                              |                                                 |                                                                  |                                  |                                     |                                        |                                    |
| <b>Very low quality:</b> We are very uncertain about the estimate.                                                                                                                                                                                                                                             |                                                 |                                                                  |                                  |                                     |                                        |                                    |
| <sup>1</sup> Selective reporting, authors had financial ties to industry sponsor                                                                                                                                                                                                                               |                                                 |                                                                  |                                  |                                     |                                        |                                    |
| <sup>2</sup> Moderate heterogeneity                                                                                                                                                                                                                                                                            |                                                 |                                                                  |                                  |                                     |                                        |                                    |
| <sup>3</sup> Wide confidence interval                                                                                                                                                                                                                                                                          |                                                 |                                                                  |                                  |                                     |                                        |                                    |

### **Sleep disturbance**

Twenty-one studies measured sleep interference using the NRS sleep interference scale or variants of it. Pregabalin significantly reduced sleep interference scores compared with placebo: SMD -0.38, 95% CI -0.50 to -0.26,  $P < 0.00001$ ,  $I^2 = 32\%$ ; the quality of the evidence was moderate (SoF Table 3; Appendix Table 1; and Figure S15). Fourteen studies reported sleep interference outcome measures with the NRS scale but did not provide adequate data for statistical pooling; 12 of these reported significant reductions in sleep interference scores favouring pregabalin over placebo, while two studies reported no significant difference between groups (Appendix Table 3). Seven studies measured sleep outcomes using the Medical Outcomes Study Sleep Scale (MOS-Sleep). We could not pool results from these studies because of insufficient data. All the studies reported significant improvements in sleep scores in favour of pregabalin over placebo (Appendix Table 3).

### **Quality of life (QOL)**

Four studies assessed QOL using EQ-5D scores or variants of it. Two of these reported significant improvements with pregabalin compared with placebo, while the other two reported no significant differences between groups (Appendix Table 3).

### **Patient Global Impression of Change (PGIC)**

Thirteen studies reported this outcome. Ten studies reported significant improvements in PGIC scores with pregabalin compared with placebo, while three studies found no significant differences between groups (Appendix Table 3). We could not pool results from these studies because insufficient data were published.

| Summary of Findings Table 3: Effect of pregabalin on sleep scores in patients with neuropathic pain                                                                                                                                                                                                                                                                                                                                                                                                                                                         |                                          |                                                                                                                      |                          |                              |                                 |                           |
|-------------------------------------------------------------------------------------------------------------------------------------------------------------------------------------------------------------------------------------------------------------------------------------------------------------------------------------------------------------------------------------------------------------------------------------------------------------------------------------------------------------------------------------------------------------|------------------------------------------|----------------------------------------------------------------------------------------------------------------------|--------------------------|------------------------------|---------------------------------|---------------------------|
| <b>Patient or population:</b> patients with Neuropathic pain<br><b>Settings:</b><br><b>Intervention:</b> Effect of pregabalin on sleep                                                                                                                                                                                                                                                                                                                                                                                                                      |                                          |                                                                                                                      |                          |                              |                                 |                           |
| Outcomes                                                                                                                                                                                                                                                                                                                                                                                                                                                                                                                                                    | Illustrative comparative risks* (95% CI) |                                                                                                                      | Relative effect (95% CI) | No of Participants (studies) | Quality of the evidence (GRADE) | Comments                  |
|                                                                                                                                                                                                                                                                                                                                                                                                                                                                                                                                                             | Assumed risk<br>Control                  | Corresponding risk<br>Effect of pregabalin on sleep                                                                  |                          |                              |                                 |                           |
| Sleep interference                                                                                                                                                                                                                                                                                                                                                                                                                                                                                                                                          |                                          | The mean sleep interference in the intervention groups was <b>0.38 standard deviations lower</b> (0.5 to 0.26 lower) |                          | 1641 (7 studies)             | ⊕⊕⊕⊖<br>moderate <sup>1</sup>   | SMD -0.38 (-0.5 to -0.26) |
| *The basis for the <b>assumed risk</b> (e.g. the median control group risk across studies) is provided in footnotes. The <b>corresponding risk</b> (and its 95% confidence interval) is based on the assumed risk in the comparison group and the <b>relative effect</b> of the intervention (and its 95% CI).                                                                                                                                                                                                                                              |                                          |                                                                                                                      |                          |                              |                                 |                           |
| <b>CI:</b> Confidence interval; <b>SMD:</b> Standardized mean difference                                                                                                                                                                                                                                                                                                                                                                                                                                                                                    |                                          |                                                                                                                      |                          |                              |                                 |                           |
| GRADE Working Group grades of evidence<br><b>High quality:</b> Further research is very unlikely to change our confidence in the estimate of effect.<br><b>Moderate quality:</b> Further research is likely to have an important impact on our confidence in the estimate of effect and may change the estimate.<br><b>Low quality:</b> Further research is very likely to have an important impact on our confidence in the estimate of effect and is likely to change the estimate.<br><b>Very low quality:</b> We are very uncertain about the estimate. |                                          |                                                                                                                      |                          |                              |                                 |                           |
| <sup>1</sup> Selective reporting, authors had financial ties to industry sponsor                                                                                                                                                                                                                                                                                                                                                                                                                                                                            |                                          |                                                                                                                      |                          |                              |                                 |                           |

### **Clinician Global Impression of Change**

Six studies reported this outcome; four of these reported significant improvements with pregabalin compared with placebo, while two found no significant differences between groups (Appendix Table 3).

### **Anxiety and depression scores**

Four studies were pooled for this outcome. There was no significant difference in HADS-Anxiety scores between groups: SMD -0.12, 95% CI -0.29 to 0.04,  $P=0.14$ ,  $I^2=44\%$ ; the quality of the evidence was moderate (SoF Table 4; Figure S16). There was also no significant difference in HADS-Depression scores between groups: SMD -0.06, 95% CI -0.26 to 0.13,  $P=0.54$ ,  $I^2=60\%$ ; the quality of the evidence was low (SoF Table 4; Appendix Table 1 and Figure S17). One study<sup>42</sup> that did not provide sufficient data for statistical pooling reported significant improvement in the HADS-Anxiety scores in favour of pregabalin, but no significant difference in HADS-depression scores between groups (Appendix Table 1). One study<sup>41</sup> measured anxiety using the VAS anxiety scale and reported significant improvements in QOL scores with fixed- and flexible-dose pregabalin compared with placebo ( $P=0.03$  and  $P=0.02$  respectively).

### **Overall discontinuations**

In total, there were 1,203 drop-outs (approximately 20%) in the 28 trials ( $n=5972$ ) that reported the data (Appendix Table 1). There was no significant difference in overall discontinuation rates between groups, RR 1.09 (95% CI 0.93 to 1.28,  $P=0.29$ ,  $I^2=51\%$ ).

| Summary of Findings Table 4: Effect of pregabalin on anxiety and depression scores in patients with neuropathic pain                                                                                                                                                                                                                                                                                                                                                                                                                                        |                                          |                                                                                                                           |                          |                              |                                      |                           |
|-------------------------------------------------------------------------------------------------------------------------------------------------------------------------------------------------------------------------------------------------------------------------------------------------------------------------------------------------------------------------------------------------------------------------------------------------------------------------------------------------------------------------------------------------------------|------------------------------------------|---------------------------------------------------------------------------------------------------------------------------|--------------------------|------------------------------|--------------------------------------|---------------------------|
| <b>Patient or population:</b> patients with Neuropathic pain<br><b>Settings:</b><br><b>Intervention:</b> Effect of pregabalin on anxiety and depression                                                                                                                                                                                                                                                                                                                                                                                                     |                                          |                                                                                                                           |                          |                              |                                      |                           |
| Outcomes                                                                                                                                                                                                                                                                                                                                                                                                                                                                                                                                                    | Illustrative comparative risks* (95% CI) |                                                                                                                           | Relative effect (95% CI) | No of Participants (studies) | Quality of the evidence (GRADE)      | Comments                  |
|                                                                                                                                                                                                                                                                                                                                                                                                                                                                                                                                                             | Assumed risk<br>Control                  | Corresponding risk<br>Effect of pregabalin on anxiety and depression                                                      |                          |                              |                                      |                           |
| HADS-Anxiety                                                                                                                                                                                                                                                                                                                                                                                                                                                                                                                                                |                                          | The mean hads-anxiety in the intervention groups was <b>0.12 standard deviations lower</b> (0.29 lower to 0.04 higher)    |                          | 1041 (4 studies)             | ⊕⊕⊕⊖<br><b>moderate</b> <sup>1</sup> | SMD -0.12 (-0.29 to 0.04) |
| HADS-Depression                                                                                                                                                                                                                                                                                                                                                                                                                                                                                                                                             |                                          | The mean hads-depression in the intervention groups was <b>0.06 standard deviations lower</b> (0.26 lower to 0.13 higher) |                          | 1041 (4 studies)             | ⊕⊕⊖⊖<br><b>low</b> <sup>1,2</sup>    | SMD -0.06 (-0.26 to 0.13) |
| *The basis for the <b>assumed risk</b> (e.g. the median control group risk across studies) is provided in footnotes. The <b>corresponding risk</b> (and its 95% confidence interval) is based on the assumed risk in the comparison group and the <b>relative effect</b> of the intervention (and its 95% CI).<br><br><b>CI:</b> Confidence interval; <b>HADS:</b> Hospital anxiety and depression scale; <b>SMD:</b> Standardized mean difference                                                                                                          |                                          |                                                                                                                           |                          |                              |                                      |                           |
| GRADE Working Group grades of evidence<br><b>High quality:</b> Further research is very unlikely to change our confidence in the estimate of effect.<br><b>Moderate quality:</b> Further research is likely to have an important impact on our confidence in the estimate of effect and may change the estimate.<br><b>Low quality:</b> Further research is very likely to have an important impact on our confidence in the estimate of effect and is likely to change the estimate.<br><b>Very low quality:</b> We are very uncertain about the estimate. |                                          |                                                                                                                           |                          |                              |                                      |                           |
| <sup>1</sup> Selective reporting, authors had financial ties to industry sponsor<br><sup>2</sup> Moderate heterogeneity                                                                                                                                                                                                                                                                                                                                                                                                                                     |                                          |                                                                                                                           |                          |                              |                                      |                           |



## DISCUSSION

### Summary of the evidence

The evidence from published RCTs suggests that pregabalin reduces pain in patients with neuropathic pain. The effect is statistically significant in peripheral neuropathic pain, but not with central neuropathic pain. Pregabalin significantly increases the risk of adverse events including weight gain, somnolence, dizziness, dry mouth, peripheral oedema, fatigue, visual disturbances, ataxia, non-peripheral oedema, vertigo and euphoria. Pregabalin significantly reduces sleep interference scores compared with placebo. There was insufficient evidence to assess an effect on quality of life. The evidence for PGIC and CGIC scores was mixed among studies that reported these outcomes and there were no significant effects on HADS anxiety and depression scores compared with placebo. There were five deaths in the pregabalin arms and one in the placebo, but insufficient power to detect an overall effect.

### Comparison with the existing literature

We have identified several published reviews assessing the effectiveness of pregabalin the management of neuropathic pain, and our results are partly consistent with these. Zhang et al<sup>46</sup> and Wang et al<sup>47</sup> showed that pregabalin was more efficacious than placebo for treatment of DPN-associated pain and PHN-associated pain respectively; however, the two reviews did not base their results on changes from baseline between groups. Semel et al<sup>48</sup> and Freeman et al<sup>49</sup> also concluded that pregabalin was more effective than placebo for neuropathic pain; however, both reviews did not account for the quality of the included primary studies.

Finnerup et al<sup>50</sup> concluded that there was modest evidence supporting the use of pregabalin for treatment of neuropathic pain; although the authors used GRADE criteria to assess the strength of recommendation, they did not report the quality of the evidence. In an overview of Cochrane reviews, Wiffen et al<sup>51</sup> concluded that there was clinical trial evidence

1  
2  
3 supporting the use of pregabalin for treatment of some aspects of neuropathic pain; however,  
4  
5 the authors did not rate the quality of the evidence for the outcomes reported.  
6  
7  
8  
9

10 Two reviews<sup>52,53</sup> that examined the safety profile of pregabalin concluded that pregabalin use  
11  
12 was significantly more associated with adverse events than placebo; however, both reviews  
13  
14 did not rate the quality of the evidence for the outcomes reported.  
15  
16  
17  
18

### 19 **Comparison with existing guidelines**

20  
21 We identified several guidelines that recommend the use of pregabalin for treatment of  
22  
23 neuropathic pain, and some of their specifications are consistent with our results. For  
24  
25 instance, the European Federation of Neurological Societies (EFNS) guideline<sup>54</sup> based on  
26  
27 data from comparative studies recommended pregabalin as first line treatment for neuropathic  
28  
29 pain; however, the guidance assessed only the level, but not the quality, of the evidence; and  
30  
31 also notes that there are too few large scale comparative studies to make definite conclusions  
32  
33 about the benefits and harms. Similarly, the American Academy of Neurology, the American  
34  
35 Association of Neuromuscular and Electrodiagnostic Medicine, and the American Academy  
36  
37 of Physical Medicine and Rehabilitation guidance<sup>55</sup> recommends pregabalin as first line  
38  
39 treatment based on levels (and not quality) of the evidence; however, they guidance  
40  
41 recommends that clinical trials of longer duration should be conducted. The Canadian Pain  
42  
43 Society (CPS) guidance<sup>56</sup> recommends pregabalin as first-line treatment for neuropathic pain,  
44  
45 but acknowledges that paucity of longer-duration trials limit the conclusions that can be  
46  
47 drawn about its benefits and harms on the long-term.  
48  
49  
50  
51  
52  
53  
54  
55  
56  
57  
58  
59  
60

### Strengths and limitations

This rapid review has limitations due to its streamlined methods and search strategy. Firstly, the rapid review methodology employed could have introduced selective outcome reporting bias; nevertheless, most of the outcomes reported in this review have been listed as outcomes of interest to be considered when designing trials of neuropathic pain interventions.<sup>57</sup> There is a risk that our review may be prone to sampling bias, and that we may have missed potentially eligible studies, which could have been identified by searching clinical trials registries and grey literature. However, we comprehensively searched the literature, and used standard criteria to assess the risk of bias and rate the quality of the evidence. It has also been reported that generally the conclusions of rapid reviews and full reviews do not greatly differ<sup>58</sup>; and enhanced rapid reviews where data is independently checked by a second reviewer could help policy makers with quicker access to the evidence base.<sup>59</sup> This review therefore provides the most up to date comprehensive summary of the available literature, as it accounts for study quality and reports clinically meaningful patient outcomes. We did not assess the extent to which different doses of pregabalin influenced the outcomes assessed; in addition, the benefits and harms of pregabalin were not analyzed according to specific neuropathic pain conditions; only two subgroups (central and peripheral neuropathic pain) were assessed.

### Implications for research

The quality of the included studies examining efficacy of pregabalin for pain was rated as low or very low according to the GRADE framework. This highlights the need for larger, robust, high-quality clinical trials to be conducted, with particular attention paid to minimizing selective reporting of outcomes. Concerns about selective reporting could be mitigated if drug manufacturers enabled access to clinical study reports (CSRs), especially as

1  
2  
3 industry-sponsored trials are likely to skew reports in favour of benefits over harms.<sup>60,61</sup> This  
4  
5 would allow for a more comprehensive assessment of the benefits and harms of pregabalin.  
6  
7 Of note, all the included trials were industry-sponsored, and an overwhelming majority of the  
8  
9 authors of the include studies had financial ties to the pharmaceutical industry. Of note, the  
10  
11 results of the only published charity-funded phase IV placebo-controlled trial that assessed  
12  
13 the effectiveness of pregabalin in management of neuropathic (radicular) pain contrast our  
14  
15 meta-analysis results – there was no significant difference in pain scores between groups.<sup>62</sup>  
16  
17 Independent and publicly funded trials assessing the benefits and harms of pregabalin should  
18  
19 be conducted. Only a few studies assessed the effect of pregabalin in improving quality of  
20  
21 life, anxiety and depression and CGIC. Future trials should further assess the role of  
22  
23 pregabalin for these outcomes. Studies investigating the type of neuropathic pain pregabalin  
24  
25 relieves (e.g. stimulus-dependent pain such as hyperalgesia or allodynia), or spontaneous pain  
26  
27 could be an area of consideration for future research.  
28  
29  
30  
31  
32  
33  
34  
35

36 That the median duration of intervention was nine weeks suggests that the intermediate to  
37  
38 longer term benefits of pregabalin for neuropathic pain are unproven. Indeed in real life  
39  
40 clinical care, it has been reported that the initial benefits seen with use of the drug in patients  
41  
42 with neuropathic pain were no longer apparent after 6 to 12 months of therapy.<sup>63</sup> Therefore,  
43  
44 RCTs that are adequately powered, and with longer durations of interventions are desirable.  
45  
46 The finding of 5 deaths among 891 participants on pregabalin, vs 1 death among 320  
47  
48 participants on placebo, is somewhat concerning. Given the low frequency of this outcome  
49  
50 (coupled with the short trial durations), RCTs are unlikely to be informative; we suggest  
51  
52 pharmacoepidemiological studies in routinely collected electronic health records and  
53  
54 spontaneous reporting databases to assess the impact of pregabalin on mortality.  
55  
56  
57  
58  
59  
60

### **Implications for clinical practice**

Very low-to-moderate quality evidence suggests that pregabalin improves some symptoms of neuropathic pain. However, it significantly increases the risk of adverse events including somnolence, oedema, visual disturbances, ataxia, vertigo and euphoria. Pregabalin also increases the risk of drug discontinuation because of adverse events. Clinicians should be cautious about prescribing pregabalin, and should consider whether its benefits outweigh potential harms in individual patients.

### **Conclusions**

The evidence from RCTs in journal publications suggests that pregabalin has beneficial effects on some symptoms of neuropathic pain. However, its use significantly increases the risk of adverse events and discontinuation due to adverse events. The quality of the evidence from journal publications is overall low, and the duration of trials is short. Greater transparency in the reporting of outcomes is advocated; independent and publicly funded trials assessing the effects of pregabalin in neuropathic pain should be encouraged. Allowing researchers access to full CSRs of pregabalin trials should be a priority for drug companies and regulators.

### **Acknowledgement**

IJO, BG and CJH are part of the Evidence Synthesis Working Group. The Evidence Synthesis Working Group is funded by the National Institute for Health Research School for Primary Care Research (NIHR SPCR) [ProjectNumber 390]. JL is supported by an NIHR In Practice Fellowship. The views expressed are those of the author(s) and not necessarily those of the NIHR, the NHS or the Department of Health.

### **Funding**

None

### **Data sharing statement**

No additional data available

### **Authors' Contribution**

IJO was involved with devising the review methods, conducting electronic searches, screening of abstracts, data extraction, data analysis and interpretation, and co-drafting of the review. ETT was involved with devising the review methods, screening of abstracts, data extraction, data analysis and interpretation, and co-drafting of the review. JL was involved with data extraction, data analysis and interpretation, and co-drafting of the review. BG was involved with devising the review methods, data analysis and interpretation, and co-drafting of the review. CJH was involved with devising the review methods, data analysis and interpretation, and co-drafting of the review.

### **Copyright/license for publication**

The Corresponding Author has the right to grant on behalf of all authors and does grant on behalf of all authors, a [worldwide licence](#) to the Publishers and its licensees in perpetuity, in all forms, formats and media (whether known now or created in the future), to i) publish, reproduce, distribute, display and store the Contribution, ii) translate the Contribution into other languages, create adaptations, reprints, include within collections and create summaries, extracts and/or, abstracts of the Contribution, iii) create any other derivative work(s) based on the Contribution, iv) to exploit all subsidiary rights in the Contribution, v) the inclusion of electronic links from the Contribution to third party material where-ever it may be located; and, vi) licence any third party to do any or all of the above.

### **Competing interests**

All authors have completed the ICMJE uniform disclosure form at [http://www.icmje.org/coi\\_disclosure.pdf](http://www.icmje.org/coi_disclosure.pdf) (available on request from the corresponding author). CJH has received expenses and fees for his media work. He has received expenses from the WHO, FDA, and holds grant funding from the NIHR, the NIHR School of Primary Care Research, The Wellcome Trust and the WHO. He has received financial remuneration from an asbestos case. He has also received income from the publication of a series of toolkit books published by Blackwells. On occasion, he receives expenses for teaching EBM and is also paid for his GP work in NHS out of hours. CEBM jointly runs the EvidenceLive

1  
2  
3 Conference with the BMJ and the Overdiagnosis Conference with some international partners  
4 which are based on a non-profit making model. BG receives funding from the Laura and John  
5 Arnold Foundation and reports personal fees from intermittent additional personal income  
6 from speaking and writing for lay audiences on problems in science and medicine including  
7 regulatory shortcomings. IJO, ETT and JL have no interests to disclose.  
8  
9  
10  
11  
12

### 13 **Transparency declaration**

14 The lead author (the manuscript's guarantor) affirms that the manuscript is an honest,  
15 accurate, and transparent account of the study being reported; that no important aspects of the  
16 study have been omitted; and that any discrepancies from the study as planned (and, if  
17 relevant, registered) have been explained.  
18  
19  
20  
21  
22  
23  
24  
25  
26  
27  
28  
29  
30  
31  
32  
33  
34  
35  
36  
37  
38  
39  
40  
41  
42  
43  
44  
45  
46  
47  
48  
49  
50  
51  
52  
53  
54  
55  
56  
57  
58  
59  
60

## REFERENCES

---

- 1 Verma V, Singh N, Singh Jaggi A. Pregabalin in neuropathic pain: evidences and possible mechanisms. *Curr Neuropharmacol*. 2014 Jan;12(1):44-56.
- 2 Taylor CP, Angelotti T, Fauman E. Pharmacology and mechanism of action of pregabalin: the calcium channel alpha2-delta (alpha2-delta) subunit as a target for antiepileptic drug discovery. *Epilepsy Res*. 2007 Feb;73(2):137-50
- 3 Goodman CW, Brett AS. Gabapentin and Pregabalin for Pain - Is Increased Prescribing a Cause for Concern? *N Engl J Med*. 2017 Aug 3;377(5):411-414.
- 4 Spence D. Bad medicine: gabapentin and pregabalin. *BMJ*. 2013 Nov 8;347:f6747. doi: 10.1136/bmj.f6747.
- 5 OpenPrescribing.net. High-level prescribing trends for Pregabalin (BNF code 0408010AE) across all GP practices in NHS England, since August 2010. Available at: <https://openprescribing.net/chemical/0408010AE/> [Last accessed 8th March, 2018]
- 6 Wang Y, Yang H, Shen C, Luo J. Morphine and pregabalin in the treatment of neuropathic pain. *Exp Ther Med*. 2017 Apr;13(4):1393-1397.
- 7 Lyndon A, Audrey S, Wells C, et al. Risk to heroin users of polydrug use of pregabalin or gabapentin. *Addiction*. 2017 Sep;112(9):1580-1589
- 8 Morrison EE, Sandilands EA, Webb DJ. Gabapentin and pregabalin: do the benefits outweigh the harms? *J R Coll Physicians Edinb* 2017; 47: 310–3
- 9 Iacobucci G. UK government to reclassify pregabalin and gabapentin after rise in deaths. *BMJ*. 2017 Sep 25;358:j4441. doi: 10.1136/bmj.j4441.
- 10 Ganann R, Ciliska D, Thomas H. Expediting systematic reviews: methods and implications of rapid reviews. *Implement Sci*. 2010 Jul 19;5:56. doi: 10.1186/1748-5908-5-56.



1  
2  
3  
4 11 International Association for the Study of Pain. What is neuropathic pain?  
5

6 <https://s3.amazonaws.com/rdcms->

7 [iasp/files/production/public/AM/Images/GYAP/What%20is%20Neuropathic%20Pain.pdf](https://s3.amazonaws.com/rdcms-iasp/files/production/public/AM/Images/GYAP/What%20is%20Neuropathic%20Pain.pdf)  
8  
9

10 [Accessed 19th January, 2018]  
11  
12

13 12 Sullivan GM. A Primer on the Validity of Assessment Instruments. *J Grad Med Educ*.  
14  
15 2011 Jun;3(2):119-20.  
16

17 13 Higgins JP, Altman DG, Gøtzsche PC, et al. The Cochrane Collaboration's tool for  
18  
19 assessing risk of bias in randomised trials. *Br Med J* 2011; 343: d5928–d5928  
20  
21

22 14 Review Manager (RevMan) (Computer program). Version 5.3. Copenhagen: The Nordic  
23  
24 Cochrane Centre, The Cochrane Collaboration, 2011  
25  
26

27 15 Furukawa TA, Barbui C, Cipriani A, Brambilla P, Watanabe N. Imputing missing  
28  
29 standard deviations in meta-analyses can provide accurate results. *J Clin Epidemiol*. 2006  
30  
31 Jan;59(1):7-10.  
32  
33

34 16 GRADEpro. Computer program on [www.gradepro.org](http://www.gradepro.org). Version 3.6. McMaster  
35  
36 University, 2014.  
37  
38

39 17 GRADE Working Group. Grading quality of evidence and strength of recommendations.  
40  
41 *BMJ* 2004; 328(7454): 1490.  
42  
43

44 18 Arezzo JC, Rosenstock J, Lamoreaux L, Pauer L. Efficacy and safety of pregabalin 600  
45  
46 mg/d for treating painful diabetic peripheral neuropathy: a double-blind placebo-controlled  
47  
48 trial. *BMC Neurol*. 2008 Sep 16;8:33. doi: 10.1186/1471-2377-8-33.  
49

50 19 Cardenas DD, Nieshoff EC, Suda K, et al. A randomized trial of pregabalin in patients  
51  
52 with neuropathic pain due to spinal cord injury. *Neurology*. 2013 Feb 5;80(6):533-9.  
53  
54

55 20 Dworkin RH, Corbin AE, Young JP Jr, et al. Pregabalin for the treatment of postherpetic  
56  
57 neuralgia: a randomized, placebo-controlled trial. *Neurology*. 2003 Apr 22;60(8):1274-83.  
58  
59  
60

- 
- 1  
2  
3  
4  
5  
6  
7  
8  
9  
10  
11  
12  
13  
14  
15  
16  
17  
18  
19  
20  
21  
22  
23  
24  
25  
26  
27  
28  
29  
30  
31  
32  
33  
34  
35  
36  
37  
38  
39  
40  
41  
42  
43  
44  
45  
46  
47  
48  
49  
50  
51  
52  
53  
54  
55  
56  
57  
58  
59  
60
- 21 Freynhagen R, Strojek K, Griesing T, Whalen E, Balkenohl M. Efficacy of pregabalin in neuropathic pain evaluated in a 12-week, randomised, double-blind, multicentre, placebo-controlled trial of flexible- and fixed-dose regimens. *Pain*. 2005 Jun;115(3):254-63.
- 22 Guan Y, Ding X, Cheng Y, et al. Efficacy of pregabalin for peripheral neuropathic pain: results of an 8-week, flexible-dose, double-blind, placebo-controlled study conducted in China. *Clin Ther*. 2011 Feb;33(2):159-66
- 23 Holbech JV, Bach FW, Finnerup NB, Brøsen K, Jensen TS, Sindrup SH. Imipramine and pregabalin combination for painful polyneuropathy: a randomized controlled trial. *Pain*. 2015 May;156(5):958-66
- 24 Huffman CL, Goldenberg JN, Weintraub J, et al. Efficacy and Safety of Once-Daily Controlled-Release Pregabalin for the Treatment of Patients With Postherpetic Neuralgia: A Double-Blind, Enriched Enrollment Randomized Withdrawal, Placebo-Controlled Trial. *Clin J Pain*. 2017 Jul;33(7):569-578.
- 25 Kanodia SK, Singhal KC. A study on efficacy of Pregabalin in acute Herpetic Neuralgia. *Ann Neurosci*. 2011 Oct;18(4):148-50.
- 26 Kim JS, Bashford G, Murphy TK, Martin A, Dror V, Cheung R. Safety and efficacy of pregabalin in patients with central post-stroke pain. *Pain*. 2011 May;152(5):1018-23.
- 27 Krcevski Skvarc N, Kamenik M. Effects of pregabalin on acute herpetic pain and postherpetic neuralgia incidence. *Wien Klin Wochenschr*. 2010 May;122 Suppl 2:49-53
- 28 Lesser H, Sharma U, LaMoreaux L, Poole RM. Pregabalin relieves symptoms of painful diabetic neuropathy: a randomized controlled trial. *Neurology*. 2004 Dec 14;63(11):2104-10.
- 29 Liu Q, Chen H, Xi L, et al. A Randomized, Double-blind, Placebo-controlled Trial to Evaluate the Efficacy and Safety of Pregabalin for Postherpetic Neuralgia in a Population of Chinese Patients. *Pain Pract*. 2017 Jan;17(1):62-69.

- 1  
2  
3  
4 30 Mathieson S, Maher CG, McLachlan AJ, et al. Trial of Pregabalin for Acute and Chronic  
5  
6 Sciatica. *N Engl J Med*. 2017 Mar 23;376(12):1111-1120.  
7  
8  
9 31 Moon DE, Lee DI, Lee SC, et al. Efficacy and tolerability of pregabalin using a flexible,  
10  
11 optimized dose schedule in Korean patients with peripheral neuropathic pain: a 10-week,  
12  
13 randomized, double-blind, placebo-controlled, multicenter study. *Clin Ther*. 2010  
14  
15 Dec;32(14):2370-85.  
16  
17  
18 32 Rauck R, Makumi CW, Schwartz S, et al. A randomized, controlled trial of gabapentin  
19  
20 enacarbil in subjects with neuropathic pain associated with diabetic peripheral neuropathy.  
21  
22 *Pain Pract*. 2013 Jul;13(6):485-96.  
23  
24  
25 33 Richter RW, Portenoy R, Sharma U, Lamoreaux L, Bockbrader H, Knapp LE. Relief of  
26  
27 painful diabetic peripheral neuropathy with pregabalin: a randomized, placebo-controlled  
28  
29 trial. *J Pain*. 2005 Apr;6(4):253-60.  
30  
31  
32 34 Rosenstock J, Tuchman M, LaMoreaux L, Sharma U. Pregabalin for the treatment of  
33  
34 painful diabetic peripheral neuropathy: a double-blind, placebo-controlled trial. *Pain*. 2004  
35  
36 Aug;110(3):628-38.  
37  
38  
39 35 Sabatowski R, Gálvez R, Cherry DA, et al. Pregabalin reduces pain and improves sleep  
40  
41 and mood disturbances in patients with post-herpetic neuralgia: results of a randomised,  
42  
43 placebo-controlled clinical trial. *Pain*. 2004 May;109(1-2):26-35.  
44  
45  
46 36 Satoh J, Yagihashi S, Baba M, et al. Efficacy and safety of pregabalin for treating  
47  
48 neuropathic pain associated with diabetic peripheral neuropathy: a 14 week, randomized,  
49  
50 double-blind, placebo-controlled trial. *Diabet Med*. 2011 Jan;28(1):109-16.  
51  
52  
53 37 Shabbir B, Shafi F, Mahboob F. Amitriptyline Vs Pregabalin in Painful Diabetic  
54  
55 Neuropathy A Randomised Placebo-Based Study. *P J M H S* 2011; 5(4): 745-747  
56  
57  
58  
59  
60

- 
- 1  
2  
3  
4 38 Siddall PJ, Cousins MJ, Otte A, Griesing T, Chambers R, Murphy TK. Pregabalin in  
5  
6 central neuropathic pain associated with spinal cord injury: a placebo-controlled trial.  
7  
8 Neurology. 2006 Nov 28;67(10):1792-800.  
9
- 10  
11 39 Simpson DM, Schifitto G, Clifford DB, et al. Pregabalin for painful HIV neuropathy: a  
12  
13 randomized, double-blind, placebo-controlled trial. Neurology. 2010 Feb 2;74(5):413-20.  
14  
15
- 16 40 Simpson DM, Rice AS, Emir B, Landen J, Semel D, Chew ML, Sporn J. A randomized,  
17  
18 double-blind, placebo-controlled trial and open-label extension study to evaluate the  
19  
20 efficacy and safety of pregabalin in the treatment of neuropathic pain associated with  
21  
22 human immunodeficiency virus neuropathy. Pain. 2014 Oct;155(10):1943-54.  
23  
24
- 25 41 Stacey BR, Barrett JA, Whalen E, Phillips KF, Rowbotham MC. Pregabalin for  
26  
27 postherpetic neuralgia: placebo-controlled trial of fixed and flexible dosing regimens on  
28  
29 allodynia and time to onset of pain relief. J Pain. 2008 Nov;9(11):1006-17  
30  
31
- 32 42 Tölle T, Freynhagen R, Versavel M, Trostmann U, Young JP Jr. Pregabalin for relief of  
33  
34 neuropathic pain associated with diabetic neuropathy: a randomized, double-blind study.  
35  
36 Eur J Pain. 2008 Feb;12(2):203-13.  
37  
38
- 39 43 van Seventer R, Feister HA, Young JP Jr, Stoker M, Versavel M, Rigaudy L. Efficacy and  
40  
41 tolerability of twice-daily pregabalin for treating pain and related sleep interference in  
42  
43 postherpetic neuralgia: a 13-week, randomized trial. Curr Med Res Opin. 2006  
44  
45 Feb;22(2):375-84.  
46  
47
- 48 44 van Seventer R, Bach FW, Toth CC, Serpell M, Temple J, Murphy TK, Nimour M.  
49  
50 Pregabalin in the treatment of post-traumatic peripheral neuropathic pain: a randomized  
51  
52 double-blind trial. Eur J Neurol. 2010 Aug;17(8):1082-9.  
53  
54
- 55 45 Vranken JH, Dijkgraaf MG, Kruis MR, van der Vegt MH, Hollmann MW, Heesen M.  
56  
57 Pregabalin in patients with central neuropathic pain: a randomized, double-blind, placebo-  
58  
59 controlled trial of a flexible-dose regimen. Pain. 2008 May;136(1-2):150-7.  
60

- 
- 1  
2  
3  
4 47. Watt A, Cameron A, Sturm L, Lathlean T, Babidge W, Blamey S. Rapid versus full  
5  
6 systematic reviews: validity in clinical practice? *ANZ J Surg* 2008. 78:1037-40.  
7  
8  
9 46 Zhang SS, Wu Z, Zhang LC, et al. Efficacy and safety of pregabalin for treating painful  
10  
11 diabetic peripheral neuropathy: a meta-analysis. *Acta Anaesthesiol Scand*. 2015  
12  
13 Feb;59(2):147-59.  
14  
15  
16 47 Wang SL, Wang H, Nie HY, Bu G, Shen XD, Wang H. The efficacy of pregabalin for  
17  
18 acute pain control in herpetic neuralgia patients: A meta-analysis. *Medicine (Baltimore)*.  
19  
20 2017 Dec;96(51):e9167.  
21  
22  
23 48 Semel D, Murphy TK, Zlateva G, Cheung R, Emir B. Evaluation of the safety and  
24  
25 efficacy of pregabalin in older patients with neuropathic pain: results from a pooled  
26  
27 analysis of 11 clinical studies. *BMC Fam Pract*. 2010 Nov 5;11:85. doi: 10.1186/1471-  
28  
29 2296-11-85.  
30  
31  
32 49 Freeman R, Durso-Decruz E, Emir B. Efficacy, safety, and tolerability of pregabalin  
33  
34 treatment for painful diabetic peripheral neuropathy: findings from seven randomized,  
35  
36 controlled trials across a range of doses. *Diabetes Care*. 2008 Jul;31(7):1448-54.  
37  
38  
39 50 Finnerup NB, Attal N, Haroutounian S, et al. Pharmacotherapy for neuropathic pain in  
40  
41 adults: a systematic review and meta-analysis. *Lancet Neurol*. 2015 Feb;14(2):162-73.  
42  
43  
44 51 Wiffen PJ, Derry S, Moore RA, et al. Antiepileptic drugs for neuropathic pain and  
45  
46 fibromyalgia - an overview of Cochrane reviews. *Cochrane Database Syst Rev*. 2013 Nov  
47  
48 11;(11):CD010567.  
49  
50  
51 52 Zaccara G, Gangemi P, Perucca P, Specchio L. The adverse event profile of pregabalin: a  
52  
53 systematic review and meta-analysis of randomized controlled trials. *Epilepsia*. 2011  
54  
55 Apr;52(4):826-36.  
56  
57  
58 53 Freynhagen R, Serpell M, Emir B, et al. A comprehensive drug safety evaluation of  
59  
60 pregabalin in peripheral neuropathic pain. *Pain Pract*. 2015 Jan;15(1):47-57.

- 
- 1  
2  
3  
4 54 Attal N, Cruccu G, Baron R, et al. EFNS guidelines on the pharmacological treatment of  
5  
6 neuropathic pain: 2010 revision. *Eur J Neurol*. 2010 Sep;17(9):1113-e88.  
7  
8
- 9 55 Bril V, England J, Franklin GM, et al. Evidence-based guideline: Treatment of painful  
10  
11 diabetic neuropathy: report of the American Academy of Neurology, the American  
12  
13 Association of Neuromuscular and Electrodiagnostic Medicine, and the American  
14  
15 Academy of Physical Medicine and Rehabilitation. *Neurology*. 2011 May 17;76(20):1758-  
16  
17 65.  
18  
19
- 20 56 Moulin D, Boulanger A, Clark AJ, Clarke H, Dao T, Finley GA, et al. Pharmacological  
21  
22 management of chronic neuropathic pain: revised consensus statement from the Canadian  
23  
24 Pain Society. *Pain Res Manag*. 2014 Nov-Dec;19(6):328-35.  
25  
26
- 27 57 Gilron I. Methodological issues associated with clinical trials in neuropathic pain. *Expert*  
28  
29 *Rev Clin Pharmacol*. 2016 Nov;9(11):1399-1402  
30  
31
- 32 58 Ganann R, Ciliska D, Thomas H. Expediting systematic reviews: methods and  
33  
34 implications of rapid reviews. *Implement Sci*. 2010 Jul 19;5:56. doi: 10.1186/1748-5908-  
35  
36 5-56.  
37  
38
- 39 59 Taylor-Phillips S, Geppert J, Stinton C, et al. Comparison of a full systematic review  
40  
41 versus rapid review approaches to assess a newborn screening test for tyrosinemia type 1.  
42  
43 *Res Synth Methods*. 2017 Dec;8(4):475-484.  
44  
45
- 46 60 Flacco ME, Manzoli L, Boccia S, et al. Head-to-head randomized trials are mostly  
47  
48 industry sponsored and almost always favor the industry sponsor. *J Clin Epidemiol*. 2015  
49  
50 Jul;68(7):811-20.  
51  
52
- 53 61 Lundh A, Lexchin J, Mintzes B, Schroll JB, Bero L. Industry sponsorship and research  
54  
55 outcome. *Cochrane Database Syst Rev*. 2017 Feb 16;2:MR000033.  
56  
57  
58  
59  
60

1  
2  
3  
4 62 Malik KM, Nelson AM, Avram MJ, Robak SL, Benzon HT. Efficacy of Pregabalin in the  
5  
6 Treatment of Radicular Pain: Results of a Controlled Trial. *Anesth Pain Med.* 2015 Aug  
7  
8 22;5(4):e28110.  
9

10  
11 63 NHS Gloucestershire. Guidance for Review of Patients taking Pregabalin for Neuropathic  
12  
13 Pain. Available at:

14  
15 [http://www.gloshospitals.nhs.uk/SharePoint19/Chronic%20and%20Acute%20Pain%20Ser](http://www.gloshospitals.nhs.uk/SharePoint19/Chronic%20and%20Acute%20Pain%20Services%20Web%20Documents/Pregabalin%20review%20(neuropathic%20pain)%20mg%204%20(2).pdf)  
16  
17 [vices%20Web%20Documents/Pregabalin%20review%20\(neuropathic%20pain\)%20mg%](http://www.gloshospitals.nhs.uk/SharePoint19/Chronic%20and%20Acute%20Pain%20Services%20Web%20Documents/Pregabalin%20review%20(neuropathic%20pain)%20mg%204%20(2).pdf)  
18  
19 [204%20\(2\).pdf](http://www.gloshospitals.nhs.uk/SharePoint19/Chronic%20and%20Acute%20Pain%20Services%20Web%20Documents/Pregabalin%20review%20(neuropathic%20pain)%20mg%204%20(2).pdf) [Last accessed 1st March, 2018].  
20  
21  
22  
23  
24  
25  
26  
27  
28  
29  
30  
31  
32  
33  
34  
35  
36  
37  
38  
39  
40  
41  
42  
43  
44  
45  
46  
47  
48  
49  
50  
51  
52  
53  
54  
55  
56  
57  
58  
59  
60

---

## Figure legends

**Figure 1:** Flow chart showing the process for inclusion of RCTs assessing the effects of pregabalin in the management of neuropathic pain

**Figure 2:** Graphical representation of the risk of bias in RCTs assessing the effects of pregabalin in the management of neuropathic pain

**Figure 3:** Risk of bias summary for RCTs assessing the effects of pregabalin in the management of neuropathic pain

**Figure 4:** Effect of pregabalin on pain scores in patients with neuropathic pain

**Figure 5:** Effect of pregabalin on the risk of adverse events in patients with neuropathic pain



**Figure 1: Flow chart showing the process for inclusion of RCTs assessing the effects of pregabalin in the management of neuropathic pain**



254x190mm (300 x 300 DPI)

**Figure 2: Graphical representation of the risk of bias in RCTs assessing the effects of pregabalin in the management of neuropathic pain**



254x190mm (300 x 300 DPI)

**Figure 3: Risk of bias summary for RCTs assessing the effects of pregabalin in the management of neuropathic pain**



254x190mm (300 x 300 DPI)

**Figure 4: Effect of pregabalin on pain scores in patients with neuropathic pain**



254x190mm (300 x 300 DPI)

**Figure 5: Effect of pregabalin on the risk of adverse events in patients with neuropathic pain**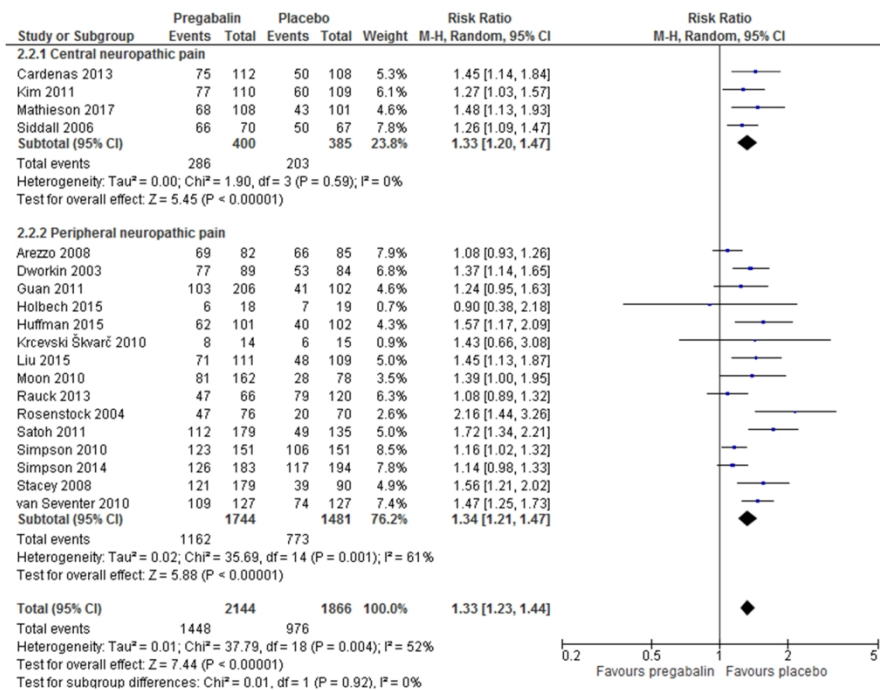

254x190mm (300 x 300 DPI)

## Appendix 1: Search strategy for identifying RCTs assessing the effects of pregabalin for management of neuropathic pain

### MEDLINE

1. pain.mp. or Pain/
2. pain\*.mp.
3. analgesia/
4. analges\*.mp.
5. neuralgia/
6. 1 or 2 or 3 or 4 or 5
7. pregabalin/
8. clinical trials.mp. or Clinical Trial/
9. randomized clinical trial.mp.
10. controlled clinical trial.mp. or Controlled Clinical Trial/
11. double-blind trial.mp.
12. placebo.ab.
13. ((doubl\$ or tripl\$ or trebl\$) adj5 (blind\$ or mask\$)).ti,ab.
14. 8 or 9 or 10 or 11 or 12 or 13
15. 6 and 7 and 14
16. (animals not (animals and humans)).sh.
17. 15 not 16

### EMBASE

1. pain/ or neuropathic pain/
2. analgesi\*.mp.
3. 1 or 2
4. pregabalin.mp. or pregabalin/
5. controlled clinical trial/ or randomized clinical trial.mp.
6. double blind procedure/

1  
2  
3 7. placebo\*.ab.

4  
5 8. random\*.ab.

6  
7 9. ((doubl\* or trebl\* or tripl\*) adj25 (blind\* or mask\*)).ab.

8  
9 10. 5 or 6 or 7 or 8 or 9

10  
11 11. 3 and 4 and 10

12  
13  
14 **COCHRANE**

15 #1 pain

16 #2 analgesia

17 #3 neuropathic pain

18 #4 neuralgia

19 #5 #1 or #2 or #3 or #4

20 #6 pregabalin

21 #7 lyrica

22 #8 #6 or #7

23 #9 randomized controlled trial.pt

24 #10 controlled controlled trial.pt

25 #11 randomized.ti,ab

26 #12 groups.ti,ab

27 #13 placebo.ti,ab

28 #14 #9 or #10 or #11 or #12 or #13

29 #15 #5 and #8 and #14

## Appendix 2: Systematic review protocol

### Benefits and harms of pregabalin in the management of neuropathic pain: a rapid systematic review and meta-analysis of randomized clinical trials

Igho J Onakpoya

University of Oxford, Centre for Evidence-Based Medicine, Nuffield Department of Primary Care Health Sciences, Oxford, United Kingdom

Elizabeth T Thomas

Faculty of Health Sciences and Medicine, Bond University, Australia

Joseph Lee

University of Oxford, Centre for Evidence-Based Medicine, Nuffield Department of Primary Care Health Sciences, Oxford, United Kingdom

Ben Goldacre

University of Oxford, Centre for Evidence-Based Medicine, Nuffield Department of Primary Care Health Sciences, Oxford, United Kingdom

Carl J Heneghan

University of Oxford, Centre for Evidence-Based Medicine, Nuffield Department of Primary Care Health Sciences, Oxford, United Kingdom

**Corresponding author:** Igho Onakpoya, University of Oxford, Centre for Evidence-Based Medicine, Nuffield Department of Primary Care Health Sciences, Radcliffe Primary Care Building, Radcliffe Observatory Quarter, Oxford United Kingdom OX2 6GG. Email: [igho.onakpoya@phc.ox.ac.uk](mailto:igho.onakpoya@phc.ox.ac.uk).



## BACKGROUND

Pregabalin is a gabapentinoid licensed for treatment of neurologic disorders. It is one of the earlier drugs approved by the FDA (2004) for the treatment of painful diabetic neuropathy (PDN) and post-herpetic neuralgia (PHN) [1]. Pregabalin is thought to exert its analgesic action through antagonistic activity at the voltage gated Ca<sup>2+</sup> channels where it binds to the alpha-2-delta subunit [1,2].

Prescriptions of pregabalin (and gabapentin) have markedly increased over the last few years. In the US, prescriptions for pregabalin rose from 39 million in 2012 to 64 million in 2016 *versus* spend increased from approximately \$2 billion to \$4.4 billion over the same period [3]. In the UK, pregabalin use increased 350% over a five year period between 2008 and 2013 [4]. In England alone, there were over 6.2 million prescriptions of pregabalin across GP practices in 2017 costing about \$440 million [5].

There is, however, some evidence of increased mortality attributed pregabalin in the UK [6], and this has led some authors to caution clinicians about the risk of harms when prescribing [7]. The risks are thought to be particularly acute for patients who use heroin and those who misuse gabapentinoids. Indeed, the UK government is soon to classify the drug as a class C controlled substance because of its abuse potential and increased reports of deaths attributed to its use [8]. Practicing clinicians have also recently called for the evidence for the effectiveness of pregabalin to be re-examined in the light of its potential to cause harms [3,4].

## OBJECTIVES

To rapidly evaluate the evidence for benefits and harms of pregabalin in the treatment of neuropathic pain in adults, using evidence from published randomized clinical trials (RCTs).

## METHODS

### Search strategy

We will conduct electronic searches in the following databases:

- Medline;
- Embase; and
- The Cochrane Central Register of Clinical Trials

Each database will be searched from inception till January 2018. No language restrictions will be imposed. We will also hand search the bibliography of eligible studies. Two review authors will independently assess the eligibility of studies for inclusion. Any disagreements will be resolved through discussion.

### Types of studies

We will include phase III double-blinded placebo-controlled RCTs assessing the effects of pregabalin on neuropathic pain aged 18 years and above. We will include studies on neuropathic pain based on the definition of the International Association for the Study of Pain (IASP) definition [9]. These include trials on diabetic neuropathy, HIV-related neuropathy, lumbar radiculopathy, post-herpetic neuralgia, and chronic postsurgical pain. We will include RCTs irrespective of study size and duration. If we include RCTs with a cross-over design, we will use data from only the first phase of the study. We will exclude phase IV trials because they are typically unblinded. We will also exclude studies that combine pregabalin with other types of intervention; however, co-interventions will be allowed. Trials that randomized participants based on response to pregabalin therapy in the run-in phase will also be excluded.

### Outcomes

#### *Primary outcomes*

- Pain (as measured using validated scales)

- Adverse events

### *Secondary outcomes*

- Sleep disturbance;
- Quality of life (QOL);
- Patient global impression of change (PGIC);
- Clinician global impression (CGI);
- Overall discontinuations; and
- Discontinuations because of adverse events.

### **Risk of bias assessment**

We will assess the risk of bias for each included study using Cochrane criteria [10] which examines the following domains:

- Method of randomisation;
- Concealment of allocation;
- Blinding of participants and personnel;
- Blinding of outcome assessment;
- Incomplete outcome data;
- Selective reporting;
- Other bias (e.g. industry funding, conflicts of interest, etc).

Two review authors will independently assess the risk of bias. Any disagreements will be resolved through discussion.

### **Data extraction:**

We will use a customized excel spreadsheet to extract relevant data from included studies.

Data to be extracted will include:

- Study ID (first author, publication year, journal, country)

- Participants (numbers, medical condition, demographics, etc.)
- Intervention (type of intervention and duration)
- Results (primary and secondary outcome measures, effect size, adverse events)
- Sources of funding

Five review authors will independently extract the data. Any disagreements will be resolved through discussion.

### **Data analyses:**

We will compute standardized mean differences (SMDs) and 95% confidence intervals (CIs) for continuous outcomes and risk ratios with 95% CI for binary outcomes. We will use the random effects model (Mantel-Haenszel) of the standard meta-analysis software (RevMan 5.3) [11] for meta-analysis. For continuous outcomes, pre- to post-intervention changes will be used to compute the data. When two or more pregabalin arms are present, the arms will be combined to create single pair-wise comparisons [12]. If we are unable to statistically combine the data, the results will be presented in a narrative format. If  $\geq 10$  studies are available for statistical pooling, we will use a funnel plot to test for publication bias. Two review authors will independently enter the data onto RevMan, and will also independently cross-check each other's entry.

### **Subgroup analysis and investigation of heterogeneity**

We will assess heterogeneity using the I-squared statistic: values of 25%, 50% and 75% will represent mild, moderate and substantial heterogeneity respectively. We will conduct subgroup analyses based on the predominant pathway for neuropathic pain - central or peripheral neuropathic pain. We will conduct sensitivity based on study quality (studies that adequately report randomization and blinding procedures) and intervention duration (shorter or longer duration of therapy). We will visually inspect funnel plots to determine publication bias.

### **Rating the quality of the evidence**

We will use the GRADEpro software (version 3.6) [13] to rate the overall quality of the body of evidence for each outcome based on the Grading of Recommendation, Assessment, Development, and Evaluation (GRADE) [14] criteria which examines the following domains:

- Study design;
- Risk of bias;
- Inconsistency;
- Indirectness; and
- Imprecision.

The overall quality of the body of the evidence will rated from high to very low as follows:

- High - Further research is very unlikely to change our confidence in the estimate of effect
- Moderate - Further research is likely to have an important impact on our confidence in the estimate of effect and may change the estimate
- Low - Further research is very likely to have an important impact on our confidence in the estimate of effect and is likely to change the estimate
- Very low - We are very uncertain about the estimate

We will use Summary of findings (SOF) tables to present these results.

### **Patient public involvement**

Because this is a rapid review, we will not enlist the services of patient representatives.

### **Sources of funding**

None

### **Conflicts of interest**

None

## REFERENCES

- 1 Verma V, Singh N, Singh Jaggi A. Pregabalin in neuropathic pain: evidences and possible mechanisms. *Curr Neuropharmacol*. 2014 Jan;12(1):44-56.
- 2 Taylor CP, Angelotti T, Fauman E. Pharmacology and mechanism of action of pregabalin: the calcium channel alpha2-delta (alpha2-delta) subunit as a target for antiepileptic drug discovery. *Epilepsy Res*. 2007 Feb;73(2):137-50
- 3 Goodman CW, Brett AS. Gabapentin and Pregabalin for Pain - Is Increased Prescribing a Cause for Concern? *N Engl J Med*. 2017 Aug 3;377(5):411-414.
- 4 Spence D. Bad medicine: gabapentin and pregabalin. *BMJ*. 2013 Nov 8;347:f6747. doi: 10.1136/bmj.f6747.
- 5 OpenPrescribing.net. High-level prescribing trends for Pregabalin (BNF code 0408010AE) across all GP practices in NHS England, since August 2010. Available at: <https://openprescribing.net/chemical/0408010AE/> [Last accessed 8th March, 2018]
- 6 Lyndon A, Audrey S, Wells C, Burnell ES, Ingle S, Hill R, Hickman M, Henderson G. Risk to heroin users of polydrug use of pregabalin or gabapentin. *Addiction*. 2017 Sep;112(9):1580-1589
- 7 Morrison EE, Sandilands EA, Webb DJ. Gabapentin and pregabalin: do the benefits outweigh the harms? *J R Coll Physicians Edinb* 2017; 47: 310–3
- 8 Iacobucci G. UK government to reclassify pregabalin and gabapentin after rise in deaths. *BMJ*. 2017 Sep 25;358:j4441. doi: 10.1136/bmj.j4441.
- 9 International Association for the Study of Pain. What is neuropathic pain? <https://s3.amazonaws.com/rdcms-iasp/files/production/public/AM/Images/GYAP/What%20is%20Neuropathic%20Pain.pdf> [Accessed 19th January, 2018]

- 
- 1  
2  
3  
4 10 Higgins JP, Altman DG, Gøtzsche PC, . The Cochrane Collaboration's tool for assessing  
5 risk of bias in randomised trials. Br Med J 2011; 343: d5928–d5928  
6  
7  
8  
9 11 Review Manager (RevMan) (Computer program). Version 5.3. Copenhagen: The Nordic  
10 Cochrane Centre, The Cochrane Collaboration, 2011  
11  
12  
13 12 Cochrane Handbook of Systematic Reviews. How to include multiple groups from one  
14 study. Chapter 16 (Section 5.4).  
15  
16 [http://handbook.cochrane.org/chapter\\_16/16\\_5\\_4\\_how\\_to\\_include\\_multiple\\_groups\\_from](http://handbook.cochrane.org/chapter_16/16_5_4_how_to_include_multiple_groups_from_one_study.htm)  
17 [\\_one\\_study.htm](http://handbook.cochrane.org/chapter_16/16_5_4_how_to_include_multiple_groups_from_one_study.htm) [Accessed 20 June 2016]  
18  
19  
20  
21  
22 13 GRADEpro. Computer program on www.gradepr.org. Version 3.6. McMaster  
23 University, 2014.  
24  
25  
26  
27 14 GRADE Working Group. Grading quality of evidence and strength of recommendations.  
28 BMJ 2004; 328(7454): 1490.  
29  
30  
31  
32  
33  
34  
35  
36  
37  
38  
39  
40  
41  
42  
43  
44  
45  
46  
47  
48  
49  
50  
51  
52  
53  
54  
55  
56  
57  
58  
59  
60

1  
2  
3 **Appendix 3: List of excluded studies and reasons for exclusion**  
4

| Study ID     | Reference                                                                                                                                                                                                                                                                                                                                                                                                | Reason for exclusion                                             |
|--------------|----------------------------------------------------------------------------------------------------------------------------------------------------------------------------------------------------------------------------------------------------------------------------------------------------------------------------------------------------------------------------------------------------------|------------------------------------------------------------------|
| Al-Hihi 2017 | Al-Hihi E, Badgett RG. In moderate-to-severe sciatica, pregabalin did not reduce leg pain intensity or improve quality of life. <i>Annals of internal medicine</i> . 2017; (2):[Jc4 p.]. Available from: <a href="http://onlinelibrary.wiley.com/o/cochrane/clcentral/articles/558/CN-01394558/frame.html">http://onlinelibrary.wiley.com/o/cochrane/clcentral/articles/558/CN-01394558/frame.html</a> . | Not primary report of RCT                                        |
| Anon 2010    | Anonymous. Pregabalin effective in relieving post-traumatic peripheral neuropathic pain. <i>Australian Journal of Pharmacy</i> . 2010;91 (1086):82.                                                                                                                                                                                                                                                      | Not primary report of RCT                                        |
| Baron 2008   | Baron R, Brunnmuller U, Brassler M, May M, Binder A. Efficacy and safety of pregabalin in patients with diabetic peripheral neuropathy or postherpetic neuralgia: Open-label, non-comparative, flexible-dose study. <i>European Journal of Pain</i> . 2008;12(7):850-8.                                                                                                                                  | Open label; also no placebo control                              |
| Baron 2010   | Baron R, Freynhagen R, Tolle TR, Cloutier C, Leon T, Murphy TK, et al. The efficacy and safety of pregabalin in the treatment of neuropathic pain associated with chronic lumbosacral radiculopathy. <i>Pain</i> . 2010;150 (3):420-7.                                                                                                                                                                   | Randomization based on response to interventions in run-in phase |
| Boyle 2012   | Boyle J, Eriksson MEV, Gribble L, Gouni R, Johnsen S, Coppini DV, et al. Randomized, placebo-controlled comparison of amitriptyline, duloxetine, and pregabalin in patients with chronic diabetic peripheral neuropathic pain: Impact on pain, polysomnographic sleep, daytime functioning, and quality of life. <i>Diabetes care</i> . 2012;35 (12):2451-8.                                             | No placebo control; only placebo run in                          |



1  
2  
3  
4  
5  
6  
7  
8  
9  
10  
11  
12  
13  
14  
15  
16  
17  
18  
19  
20  
21  
22  
23  
24  
25  
26  
27  
28  
29  
30  
31  
32  
33  
34  
35  
36  
37  
38  
39  
40  
41  
42  
43  
44  
45  
46

|                 |                                                                                                                                                                                                                                                                                                                                                                                                                                                      |                                                                               |
|-----------------|------------------------------------------------------------------------------------------------------------------------------------------------------------------------------------------------------------------------------------------------------------------------------------------------------------------------------------------------------------------------------------------------------------------------------------------------------|-------------------------------------------------------------------------------|
| Calkins 2014    | Calkins A, Shurman J, Jaros M, Kim R, Shang G. Peripheral edema and weight gain in adult patients with painful diabetic peripheral neuropathy (DPN) receiving gabapentin enacarbil (GEN) or pregabalin enrolled in a randomized phase 2 trial. Neurology Conference: 66th American Academy of Neurology Annual Meeting, AAN. 2014;82(10 SUPPL. 1).                                                                                                   | Did not report neuropathic pain as an outcome                                 |
| Cardenas 2012   | Cardenas D, Nieshoff E, Suda K, Goto S, Kaneko T, Parsons B, et al. A 17-week, randomized, double-blind, placebo-controlled, parallel-group, multi-center trial of pregabalin for the treatment of chronic central neuropathic pain after spinal cord injury. Journal of pain. 2012;Conference: 31st Annual Scientific Meeting of the American Pain Society. Honolulu, HI United States. Conference Publication: (var.pagings). 13 (4 SUPPL. 1):S62. | Duplicate of study already included in the review: Duplicate of Cardenas 2013 |
| Cardenas 2013   | Cardenas DD, Nieshoff E, Parsons B, Sanin L, Kaneko T, Suzuki M, et al. Assessment of neuropathic pain during a 17-week, double-blind, placebo-controlled, trial of pregabalin in patients with spinal cord injury. Regional Anesthesia and Pain Medicine Conference: 11th Annual ASRA Pain Medicine Meeting Miami, FL United States Conference Publication:. 2013;38(1).                                                                            | Duplicate of study already included in the review: Duplicate of Cardenas 2013 |
| De Andrade 2015 | De Andrade DC, Teixeira MJ, Galhardoni R, Ferreira KASL, Malieno PB, Scisci N, et al. A phase III, randomized, double-blind, placebo-controlled trial to evaluate the efficacy and safety of pregabalin in the prevention and reduction of oxaliplatin-induced painful neuropathy (PreOx). Journal of Clinical Oncology Conference. 2015;33(15 SUPPL. 1).                                                                                            | Pain experienced during cancer chemotherapy                                   |

|                                                                |                      |                                                                                                                                                                                                                                                                                                                                                                                        |                                                                                            |
|----------------------------------------------------------------|----------------------|----------------------------------------------------------------------------------------------------------------------------------------------------------------------------------------------------------------------------------------------------------------------------------------------------------------------------------------------------------------------------------------|--------------------------------------------------------------------------------------------|
| 1<br>2<br>3                                                    | Duarte 2014          | Duarte MAG, Cardenas-Soto K, Lem M, Castillo C, Gibbons C, Freeman R. Efficacy of pregabalin in the treatment of prediabetic neuropathic pain. Neurology Conference: 66th American Academy of Neurology Annual Meeting, AAN. 2014;82(10 SUPPL. 1).                                                                                                                                     | No placebo control; evaluation in open-label run-in                                        |
| 4<br>5<br>6<br>7<br>8<br>9                                     | Eerdekens 2016       | Eerdekens M, Koch ED, Kok M, Sohns M, Forst T. Cebranopadol, a novel first-in-class analgesic: Efficacy, safety, tolerability in patients with pain due to diabetic peripheral neuropathy (U). Pain practice. 2016;Conference: 8th World Congress of the World Institute of Pain, WIP 2016. New York City, NY United States. Conference Publication: (var.pagings). 16 (SUPPL. 1):100. | Unclear how many participants were in each intervention arm                                |
| 10<br>11<br>12<br>13<br>14<br>15<br>16<br>17<br>18             | Freyenhagen 2006     | Freyenhagen R, Busche P, Konrad C, Balkenohl M. [Effectiveness and time to onset of pregabalin in patients with neuropathic pain]. Der Schmerz. 2006;20(4):285-8.                                                                                                                                                                                                                      | Non-English study: Duplicate of Freynhagen 2005                                            |
| 19<br>20<br>21<br>22<br>23<br>24<br>25<br>26<br>27<br>28<br>29 | Gabrani 2016         | Gabrani A, Dobi D, Tomori S, Berberi F, Como A, Kapisyzi MR. Efectiveness of pregabalin compared with amytriptilin in acute Herpetic Neuralgia. Neurology Conference: 68th American Academy of Neurology Annual Meeting, AAN. 2016;86(16 SUPPL. 1).                                                                                                                                    | Not a placebo-controlled study                                                             |
| 30<br>31<br>32<br>33<br>34<br>35                               | Gilron 2011          | Gilron I, Wajsbrodt D, Therrien F, Lemay J. Pregabalin for peripheral neuropathic pain: a multicenter, enriched enrollment randomized withdrawal placebo-controlled trial. Clinical journal of pain. 2011;27(3):185-93.                                                                                                                                                                | Single-blinded Randomization to placebo/PGB occurred after a run in period of pre-gabalin? |
| 36<br>37<br>38<br>39<br>40<br>41<br>42<br>43<br>44<br>45<br>46 | Gonzalez-Duarte 2016 | Gonzalez-Duarte A, Lem M, Diaz-Diaz E, Castillo C, Cardenas-Soto K. The Efficacy of Pregabalin in the Treatment of Prediabetic Neuropathic Pain. Clinical journal of pain. 2016;32(11):927-32.                                                                                                                                                                                         | Randomization based on response to interventions in run-in phase                           |

1  
2  
3  
4  
5  
6  
7  
8  
9  
10  
11  
12  
13  
14  
15  
16  
17  
18  
19  
20  
21  
22  
23  
24  
25  
26  
27  
28  
29  
30  
31  
32  
33  
34  
35  
36  
37  
38  
39  
40  
41  
42  
43  
44  
45  
46

Jenkins 2010

Jenkins T, Smart T, Hackman F, Cooke C, Tan K, Cheung R. Pregabalin in post-traumatic peripheral neuropathic pain: Efficient assessment of efficacy in a randomised, double-blind, placebo-controlled crossover study. *European Journal of Pain Supplements*. 2010;Conference: 3rd International Congress on Neuropathic Pain. Athens Greece. Conference Publication: (var.pagings). 4 (1):89.

Duplicate of study already excluded from the review: Jenkins 2012

Jenkins 2012

Jenkins TM, Smart TS, Hackman F, Cooke C, Tan KKC. Efficient assessment of efficacy in post-traumatic peripheral neuropathic pain patients: Pregabalin in a randomized, placebo-controlled, crossover study. *Journal of pain research*. 2012;5:243-50.

Phase I: proof of concept

Jensen-Dahm 2011

Jensen-Dahm C, Rowbotham MC, Reda H, Petersen KL. Effect of a single dose of pregabalin on herpes zoster pain. *Trials [Electronic Resource]*. 2011;12(55):28.

Phase 2

Kruszewski 2007

Kruszewski SP, Shane JA. Pregabalin in central neuropathic pain associated with spinal cord injury: a placebo-controlled trial. *Neurology*. 2007;68(24):2158-9.

Not primary report of RCT

Mishra 2012

Mishra S, Bhatnagar S, Goyal GN, Rana SPS, Upadhyaya SP. A comparative efficacy of amitriptyline, gabapentin, and pregabalin in neuropathic cancer pain: a prospective randomized double-blind placebo-controlled study. *American Journal of Hospice & Palliative Medicine*. 2012;29(3):177-82.

Pain experienced during cancer chemotherapy

|    |               |                                                                                                                                                                                                                                                                                                                                                                                                                                      |                                                                                    |
|----|---------------|--------------------------------------------------------------------------------------------------------------------------------------------------------------------------------------------------------------------------------------------------------------------------------------------------------------------------------------------------------------------------------------------------------------------------------------|------------------------------------------------------------------------------------|
| 1  |               |                                                                                                                                                                                                                                                                                                                                                                                                                                      |                                                                                    |
| 2  |               |                                                                                                                                                                                                                                                                                                                                                                                                                                      |                                                                                    |
| 3  | Morrison 2015 | Morrison S, Parson H, Vinik AI. Pregabalin positively affects subjective pain, falls risk, and gait in persons with diabetic peripheral neuropathy. <i>Diabetes</i> . 2015;Conference: 75th Scientific Sessions of the American Diabetes Association. Boston, MA United States. Conference Publication: (var.pagings). 64 (SUPPL. 1):A164.                                                                                           | Cross-over trial that did not report data from first phase                         |
| 4  |               |                                                                                                                                                                                                                                                                                                                                                                                                                                      |                                                                                    |
| 5  |               |                                                                                                                                                                                                                                                                                                                                                                                                                                      |                                                                                    |
| 6  |               |                                                                                                                                                                                                                                                                                                                                                                                                                                      |                                                                                    |
| 7  |               |                                                                                                                                                                                                                                                                                                                                                                                                                                      |                                                                                    |
| 8  |               |                                                                                                                                                                                                                                                                                                                                                                                                                                      |                                                                                    |
| 9  |               |                                                                                                                                                                                                                                                                                                                                                                                                                                      |                                                                                    |
| 10 |               |                                                                                                                                                                                                                                                                                                                                                                                                                                      |                                                                                    |
| 11 |               |                                                                                                                                                                                                                                                                                                                                                                                                                                      |                                                                                    |
| 12 | Parsons 2013  | Parsons B, Emir B. Examining the time-to-improvement of pain in patients with chronic neuropathic pain due to spinal cord injury. <i>Journal of pain</i> . 2013;Conference: 32nd Annual Scientific Meeting of the American Pain Society. New Orleans, LA United States. Conference Publication: (var.pagings). 14 (4 SUPPL. 1):S60.                                                                                                  | Not primary report of RCT: report of 2 separate primary studies included in review |
| 13 |               |                                                                                                                                                                                                                                                                                                                                                                                                                                      |                                                                                    |
| 14 |               |                                                                                                                                                                                                                                                                                                                                                                                                                                      |                                                                                    |
| 15 |               |                                                                                                                                                                                                                                                                                                                                                                                                                                      |                                                                                    |
| 16 |               |                                                                                                                                                                                                                                                                                                                                                                                                                                      |                                                                                    |
| 17 |               |                                                                                                                                                                                                                                                                                                                                                                                                                                      |                                                                                    |
| 18 |               |                                                                                                                                                                                                                                                                                                                                                                                                                                      |                                                                                    |
| 19 | Parsons 2015  | Parsons B, Emir B, Knapp L. Examining the Time to Improvement of Sleep Interference With Pregabalin in Patients With Painful Diabetic Peripheral Neuropathy and Postherpetic Neuralgia. <i>American journal of therapeutics</i> . 2015;22(4):257-68.                                                                                                                                                                                 | Not primary report of RCT                                                          |
| 20 |               |                                                                                                                                                                                                                                                                                                                                                                                                                                      |                                                                                    |
| 21 |               |                                                                                                                                                                                                                                                                                                                                                                                                                                      |                                                                                    |
| 22 |               |                                                                                                                                                                                                                                                                                                                                                                                                                                      |                                                                                    |
| 23 |               |                                                                                                                                                                                                                                                                                                                                                                                                                                      |                                                                                    |
| 24 |               |                                                                                                                                                                                                                                                                                                                                                                                                                                      |                                                                                    |
| 25 |               |                                                                                                                                                                                                                                                                                                                                                                                                                                      |                                                                                    |
| 26 | Parsons 2012  | Parsons B, Nieshoff E, Cardenas D, Sanin L, Kaneko T, Suzuki M, et al. Weekly assessments of pain and sleep during a 17-week, double-blind, placebo-controlled trial of pregabalin for the treatment of chronic neuropathic pain after spinal cord injury. <i>Neurology</i> . 2012;Conference: 64th American Academy of Neurology Annual Meeting. New Orleans, LA United States. Conference Publication: (var.pagings). 79 (11):e88. | Duplicate of study already included in the review: Duplicate of Cardenas 2013      |
| 27 |               |                                                                                                                                                                                                                                                                                                                                                                                                                                      |                                                                                    |
| 28 |               |                                                                                                                                                                                                                                                                                                                                                                                                                                      |                                                                                    |
| 29 |               |                                                                                                                                                                                                                                                                                                                                                                                                                                      |                                                                                    |
| 30 |               |                                                                                                                                                                                                                                                                                                                                                                                                                                      |                                                                                    |
| 31 |               |                                                                                                                                                                                                                                                                                                                                                                                                                                      |                                                                                    |
| 32 |               |                                                                                                                                                                                                                                                                                                                                                                                                                                      |                                                                                    |
| 33 |               |                                                                                                                                                                                                                                                                                                                                                                                                                                      |                                                                                    |
| 34 |               |                                                                                                                                                                                                                                                                                                                                                                                                                                      |                                                                                    |
| 35 |               |                                                                                                                                                                                                                                                                                                                                                                                                                                      |                                                                                    |
| 36 |               |                                                                                                                                                                                                                                                                                                                                                                                                                                      |                                                                                    |
| 37 |               |                                                                                                                                                                                                                                                                                                                                                                                                                                      |                                                                                    |
| 38 |               |                                                                                                                                                                                                                                                                                                                                                                                                                                      |                                                                                    |
| 39 |               |                                                                                                                                                                                                                                                                                                                                                                                                                                      |                                                                                    |
| 40 |               |                                                                                                                                                                                                                                                                                                                                                                                                                                      |                                                                                    |
| 41 |               |                                                                                                                                                                                                                                                                                                                                                                                                                                      |                                                                                    |
| 42 |               |                                                                                                                                                                                                                                                                                                                                                                                                                                      |                                                                                    |
| 43 |               |                                                                                                                                                                                                                                                                                                                                                                                                                                      |                                                                                    |
| 44 |               |                                                                                                                                                                                                                                                                                                                                                                                                                                      |                                                                                    |
| 45 |               |                                                                                                                                                                                                                                                                                                                                                                                                                                      |                                                                                    |
| 46 |               |                                                                                                                                                                                                                                                                                                                                                                                                                                      |                                                                                    |

1  
2  
3  
4  
5  
6  
7  
8  
9  
10  
11  
12  
13  
14  
15  
16  
17  
18  
19  
20  
21  
22  
23  
24  
25  
26  
27  
28  
29  
30  
31  
32  
33  
34  
35  
36  
37  
38  
39  
40  
41  
42  
43  
44  
45  
46

|                         |                                                                                                                                                                                                                                                                                                                                  |                                                                          |
|-------------------------|----------------------------------------------------------------------------------------------------------------------------------------------------------------------------------------------------------------------------------------------------------------------------------------------------------------------------------|--------------------------------------------------------------------------|
| Parsons 2015 (Ann Neur) | Parsons B, Shang N, Yan P, Fan D. Efficacy and safety of pregabalin for postherpetic neuralgia in Chinese patients. <i>Annals of Neurology</i> . 2015;Conference: 140th Annual Meeting of the American Neurological Association, ANA 2015. Chicago, IL United States. Conference Publication: (var.pagings). 78 (SUPPL. 19):S92. | Duplicate of study already included in the review: Duplicate of Liu 2015 |
| Puiu 2015               | Puiu T, Kairys A, Pauer L, Schmidt-Wilcke T, Ichesco E, Hampson J, et al. Alterations in brain gray matter volume are associated with reduced evoked-pain connectivity following acute pregabalin administration. <i>Neurology Conference: 67th American Academy of Neurology Annual Meeting, AAN</i> . 2015;84(SUPPL. 14).      | Included participants with fibromyalgia                                  |
| Raskin 2014             | Raskin P, Huffman C, Toth C, Asmus MJ, Messig M, Sanchez RJ, et al. Pregabalin in patients with inadequately treated painful diabetic peripheral neuropathy: a randomized withdrawal trial. <i>Clinical journal of pain</i> . 2014;30(5):379-90.                                                                                 | Randomization based on response to interventions in run-in phase         |
| Satoh 2011              | Satoh J, Yagihashi S, Baba M, Suzuki M, Arakawa A, Yoshiyama T. Efficacy and safety evaluation of pregabalin treatment over 52weeks in patients with diabetic neuropathic pain extended after a double-blind placebo-controlled trial. <i>Journal of diabetes investigation</i> . 2011;2 (6):457-63.                             | Open label; also no placebo control                                      |

|                                                                                                                |                   |                                                                                                                                                                                                                                                                                                                                                               |                                                                      |
|----------------------------------------------------------------------------------------------------------------|-------------------|---------------------------------------------------------------------------------------------------------------------------------------------------------------------------------------------------------------------------------------------------------------------------------------------------------------------------------------------------------------|----------------------------------------------------------------------|
| 1<br>2<br>3<br>4<br>5<br>6<br>7<br>8<br>9<br>10<br>11                                                          | van Seventer 2009 | Van Seventer R, Murphy K, Temple J, McKenzie I, Serpell M, Toth C, et al. Pregabalin is effective in the treatment of posttraumatic peripheral neuropathic pain. Journal of pain. 2009;Conference: 28th Annual Scientific Meeting of the American Pain Society, APS. San Diego, CA United States. Conference Publication: (var.pagings). 10 (4 SUPPL. 1):S35. | Duplicate of study already included in the review: Van Seventer 2010 |
| 12<br>13<br>14<br>15<br>16<br>17<br>18                                                                         | Vinik 2014- 1     | Vinik A, Rosenstock J, Sharma U, Feins K, Hsu C, Merante D. Efficacy and safety of mirogabalin (DS-5565) for the treatment of diabetic peripheral neuropathic pain: A randomized, double-blind, placebo- and active comparator-controlled, adaptive proof-of-concept phase 2 study. Diabetes care. 2014;37 (12):3253-61.                                      | Proof of concept study                                               |
| 19<br>20<br>21<br>22<br>23<br>24<br>25<br>26<br>27                                                             | Vinik 2014-2      | Vinik A, Sharma U, Feins K, Hsu C, Merante D. Central nervous system safety and tolerability of DS-5565: A randomized, double-blind, placebo-and active comparator-controlled phase II study in diabetic peripheral neuropathic pain. Neurology Conference: 66th American Academy of Neurology Annual Meeting, AAN. 2014;82(10 SUPPL. 1).                     | Duplicate of study already excluded from the review (Vinik 2014-1)   |
| 28<br>29<br>30<br>31<br>32<br>33<br>34<br>35<br>36<br>37<br>38<br>39<br>40<br>41<br>42<br>43<br>44<br>45<br>46 | Vinik 2014-3      | Vinik A, Sharma U, Feins K, Hsu C, Merante D. DS-5565 for the treatment of diabetic peripheral neuropathic pain: Randomized, double-blind, placebo-and active comparator-controlled phase ii study. Neurology Conference: 66th American Academy of Neurology Annual Meeting, AAN. 2014;82(10 SUPPL. 1).                                                       | Duplicate of study already excluded from the review (Vinik 2014-1)   |

|    |              |                                                                                                                                                                                                                                                                                                                                                                                                              |                                                                    |
|----|--------------|--------------------------------------------------------------------------------------------------------------------------------------------------------------------------------------------------------------------------------------------------------------------------------------------------------------------------------------------------------------------------------------------------------------|--------------------------------------------------------------------|
| 1  |              |                                                                                                                                                                                                                                                                                                                                                                                                              |                                                                    |
| 2  |              |                                                                                                                                                                                                                                                                                                                                                                                                              |                                                                    |
| 3  | Vinik 2014-4 | Vinik AI, Sharma U, Feins K, Hsu C, Merante D. Safety/tolerability profile of DS-5565: A new potent, specific alpha2-delta ligand for the treatment of diabetic peripheral neuropathic pain. Diabetes. 2014;Conference: 74th Scientific Sessions of the American Diabetes Association. San Francisco, CA United States. Conference Publication: (var.pagings). 63 (SUPPL. 1):A298.                           | Duplicate of study already excluded from the review (Vinik 2014-1) |
| 4  |              |                                                                                                                                                                                                                                                                                                                                                                                                              |                                                                    |
| 5  |              |                                                                                                                                                                                                                                                                                                                                                                                                              |                                                                    |
| 6  |              |                                                                                                                                                                                                                                                                                                                                                                                                              |                                                                    |
| 7  |              |                                                                                                                                                                                                                                                                                                                                                                                                              |                                                                    |
| 8  |              |                                                                                                                                                                                                                                                                                                                                                                                                              |                                                                    |
| 9  |              |                                                                                                                                                                                                                                                                                                                                                                                                              |                                                                    |
| 10 |              |                                                                                                                                                                                                                                                                                                                                                                                                              |                                                                    |
| 11 |              |                                                                                                                                                                                                                                                                                                                                                                                                              |                                                                    |
| 12 |              |                                                                                                                                                                                                                                                                                                                                                                                                              |                                                                    |
| 13 | Vinik 2014-5 | Vinik AI, Sharma U, Feins K, Hsu C, Merante D. A randomized, double-blind, placebo- and active comparator (pregabalin)-controlled phase II study of DS-5565 for the treatment of diabetic peripheral neuropathic pain. Diabetes. 2014;Conference: 74th Scientific Sessions of the American Diabetes Association. San Francisco, CA United States. Conference Publication: (var.pagings). 63 (SUPPL. 1):A294. | Duplicate of study already excluded from the review (Vinik 2014-1) |
| 14 |              |                                                                                                                                                                                                                                                                                                                                                                                                              |                                                                    |
| 15 |              |                                                                                                                                                                                                                                                                                                                                                                                                              |                                                                    |
| 16 |              |                                                                                                                                                                                                                                                                                                                                                                                                              |                                                                    |
| 17 |              |                                                                                                                                                                                                                                                                                                                                                                                                              |                                                                    |
| 18 |              |                                                                                                                                                                                                                                                                                                                                                                                                              |                                                                    |
| 19 |              |                                                                                                                                                                                                                                                                                                                                                                                                              |                                                                    |
| 20 |              |                                                                                                                                                                                                                                                                                                                                                                                                              |                                                                    |
| 21 |              |                                                                                                                                                                                                                                                                                                                                                                                                              |                                                                    |
| 22 |              |                                                                                                                                                                                                                                                                                                                                                                                                              |                                                                    |
| 23 |              |                                                                                                                                                                                                                                                                                                                                                                                                              |                                                                    |
| 24 |              |                                                                                                                                                                                                                                                                                                                                                                                                              |                                                                    |
| 25 |              |                                                                                                                                                                                                                                                                                                                                                                                                              |                                                                    |
| 26 |              |                                                                                                                                                                                                                                                                                                                                                                                                              |                                                                    |
| 27 |              |                                                                                                                                                                                                                                                                                                                                                                                                              |                                                                    |
| 28 |              |                                                                                                                                                                                                                                                                                                                                                                                                              |                                                                    |
| 29 |              |                                                                                                                                                                                                                                                                                                                                                                                                              |                                                                    |
| 30 |              |                                                                                                                                                                                                                                                                                                                                                                                                              |                                                                    |
| 31 |              |                                                                                                                                                                                                                                                                                                                                                                                                              |                                                                    |
| 32 |              |                                                                                                                                                                                                                                                                                                                                                                                                              |                                                                    |
| 33 |              |                                                                                                                                                                                                                                                                                                                                                                                                              |                                                                    |
| 34 |              |                                                                                                                                                                                                                                                                                                                                                                                                              |                                                                    |
| 35 |              |                                                                                                                                                                                                                                                                                                                                                                                                              |                                                                    |
| 36 |              |                                                                                                                                                                                                                                                                                                                                                                                                              |                                                                    |
| 37 |              |                                                                                                                                                                                                                                                                                                                                                                                                              |                                                                    |
| 38 |              |                                                                                                                                                                                                                                                                                                                                                                                                              |                                                                    |
| 39 |              |                                                                                                                                                                                                                                                                                                                                                                                                              |                                                                    |
| 40 |              |                                                                                                                                                                                                                                                                                                                                                                                                              |                                                                    |
| 41 |              |                                                                                                                                                                                                                                                                                                                                                                                                              |                                                                    |
| 42 |              |                                                                                                                                                                                                                                                                                                                                                                                                              |                                                                    |
| 43 |              |                                                                                                                                                                                                                                                                                                                                                                                                              |                                                                    |
| 44 |              |                                                                                                                                                                                                                                                                                                                                                                                                              |                                                                    |
| 45 |              |                                                                                                                                                                                                                                                                                                                                                                                                              |                                                                    |
| 46 |              |                                                                                                                                                                                                                                                                                                                                                                                                              |                                                                    |

## Appendix 4: Risk of bias judgements for included studies

### Arezzo 2008

#### Risk of bias table

| Bias                                                      | Authors' judgement | Support for judgement                                                                                                                                                                                                                            |
|-----------------------------------------------------------|--------------------|--------------------------------------------------------------------------------------------------------------------------------------------------------------------------------------------------------------------------------------------------|
| Random sequence generation (selection bias)               | Low risk           | Computer-generated random code                                                                                                                                                                                                                   |
| Allocation concealment (selection bias)                   | Low risk           | Number-coded study medications to the study sites were assigned using an interactive voice-response system                                                                                                                                       |
| Blinding of participants and personnel (performance bias) | Low risk           | Blinding was maintained by dispensing pregabalin and placebo in identical capsules                                                                                                                                                               |
| Blinding of outcome assessment (detection bias)           | Low risk           | The sponsor, members of the study site, and the patients were unaware of the treatment assignment                                                                                                                                                |
| Incomplete outcome data (attrition bias)                  | Unclear risk       | Reasons for attrition reported; however, drop-out rates were 34.1% for pregabalin and 28.1% for placebo                                                                                                                                          |
| Selective reporting (reporting bias)                      | Unclear risk       | Outcomes reported as specified in methods. BOCF results also reported for pain scores. However, MD and SD for baseline and end-points were not reported separately, and some outcomes were reported at other time points other than at 13 weeks. |
| Other bias                                                | High risk          | All investigators had financial ties to the sponsor                                                                                                                                                                                              |



1  
2  
3 **Cardenas 2013**  
4

5 **Risk of bias table**  
6

| Bias                                                      | Authors' judgement | Support for judgement                                                                                                                                                                                     |
|-----------------------------------------------------------|--------------------|-----------------------------------------------------------------------------------------------------------------------------------------------------------------------------------------------------------|
| Random sequence generation (selection bias)               | Low risk           | Computer-generated sequence                                                                                                                                                                               |
| Allocation concealment (selection bias)                   | Low risk           | Interactive response technology system (via phone or internet) provided a unique identification number for each patient                                                                                   |
| Blinding of participants and personnel (performance bias) | Low risk           | Both placebo and pregabalin were in the form of gray capsules                                                                                                                                             |
| Blinding of outcome assessment (detection bias)           | Low risk           | Treatment allocation was concealed from patient and investigator                                                                                                                                          |
| Incomplete outcome data (attrition bias)                  | Unclear risk       | Acceptable dropout 15.7% placebo, 17% PGB. Reasons for dropout explained. ITT analysis (and modified ITT analysis) performed                                                                              |
| Selective reporting (reporting bias)                      | High risk          | Following pre-specified outcomes from protocol not reported in study: Modified Brief Pain Inventory Interference Scale; Quantitative Assessment of Neuropathic Pain (QANeP) 6 outcomes; NPSI (9 outcomes) |
| Other bias                                                | High risk          | All the investigators had financial ties to the study sponsor                                                                                                                                             |

1  
2  
3 **Dworkin 2003**  
4

5 **Risk of bias table**  
6  
7

| Bias                                                      | Authors' judgement | Support for judgement                                                                                                                                                                                                                                             |
|-----------------------------------------------------------|--------------------|-------------------------------------------------------------------------------------------------------------------------------------------------------------------------------------------------------------------------------------------------------------------|
| Random sequence generation (selection bias)               | Unclear risk       | Sequential randomization schedule generated with block size of four. Unclear how this schedule was generated                                                                                                                                                      |
| Allocation concealment (selection bias)                   | Low risk           | Study medication was packaged and labeled with sequential randomization numbers                                                                                                                                                                                   |
| Blinding of participants and personnel (performance bias) | Unclear risk       | Placebo capsules were identical in appearance to pregabalin; however also states that blinding could have been broken in emergency situations                                                                                                                     |
| Blinding of outcome assessment (detection bias)           | Low risk           | Blind maintained until after the study was completed and all decisions regarding data evaluability had been made                                                                                                                                                  |
| Incomplete outcome data (attrition bias)                  | Unclear risk       | Uneven numbers of drop outs- PGB 35%, placebo 12%. Reasons provided- mostly due to adverse events                                                                                                                                                                 |
| Selective reporting (reporting bias)                      | Unclear risk       | 29 patients had possibly important variations from the protocol and details of this are specified. Secondary outcome of CGIC- mentioned in results that clinicians assessments of global change closely paralleled patients' assessments however no figures given |
| Other bias                                                | High risk          | All the investigators had financial ties to the study sponsor                                                                                                                                                                                                     |

**Freyenhagen 2005**

**Risk of bias table**

| Bias                                                      | Authors' judgement | Support for judgement                                                                                                                                         |
|-----------------------------------------------------------|--------------------|---------------------------------------------------------------------------------------------------------------------------------------------------------------|
| Random sequence generation (selection bias)               | Unclear risk       | Insufficient information                                                                                                                                      |
| Allocation concealment (selection bias)                   | Unclear risk       | Insufficient information                                                                                                                                      |
| Blinding of participants and personnel (performance bias) | Unclear risk       | All patients received active medication or matching placebo capsules. Double blinded. However, unclear whether they were identical in appearance and taste    |
| Blinding of outcome assessment (detection bias)           | Unclear risk       | Insufficient information                                                                                                                                      |
| Incomplete outcome data (attrition bias)                  | High risk          | High rates of dropout: PGB flexible dose 35%, PGB fixed dose 38%, 46%. Reasons provided (mostly due to adverse events for PGB, lack of efficacy for Placebo). |
| Selective reporting (reporting bias)                      | Low risk           | Outcomes specified in methods match those found in results.                                                                                                   |
| Other bias                                                | High risk          | All study investigators had financial ties to the study sponsor                                                                                               |

1  
2  
3 **Guan 2011**  
4

5 **Risk of bias table**  
6  
7

| Bias                                                      | Authors' judgement | Support for judgement                                                                                                                                                                                                                         |
|-----------------------------------------------------------|--------------------|-----------------------------------------------------------------------------------------------------------------------------------------------------------------------------------------------------------------------------------------------|
| Random sequence generation (selection bias)               | Unclear risk       | Insufficient information                                                                                                                                                                                                                      |
| Allocation concealment (selection bias)                   | Unclear risk       | Insufficient information                                                                                                                                                                                                                      |
| Blinding of participants and personnel (performance bias) | Unclear risk       | Double blinded- however insufficient information to determine whether blind could have been broken                                                                                                                                            |
| Blinding of outcome assessment (detection bias)           | Unclear risk       | Insufficient information                                                                                                                                                                                                                      |
| Incomplete outcome data (attrition bias)                  | Low risk           | Low numbers of dropout due to adverse events (3% PGB, 5% Placebo), however no information on total numbers of dropout (or other reasons for dropout)                                                                                          |
| Selective reporting (reporting bias)                      | Unclear risk       | The weekly mean pain DPRS score was listed as a secondary efficacy outcome in protocol, but included in the primary outcomes in publication. Also, final report introduced DAAC (Duration-adjusted average change score) as a primary outcome |
| Other bias                                                | High risk          | All study investigators had financial ties to the study sponsor                                                                                                                                                                               |

**Holbech 2015****Risk of bias table**

| Bias                                                      | Authors' judgement | Support for judgement                                                                                                                                             |
|-----------------------------------------------------------|--------------------|-------------------------------------------------------------------------------------------------------------------------------------------------------------------|
| Random sequence generation (selection bias)               | Low risk           | Computer-generated randomization                                                                                                                                  |
| Allocation concealment (selection bias)                   | Low risk           | Randomization plan was generated by a person at a pharmacy not otherwise involved in the trial; Sealed, opaque envelopes used in emergency situations.            |
| Blinding of participants and personnel (performance bias) | Low risk           | Double-blinded (patients, investigators and all other staff). Identical tablets.                                                                                  |
| Blinding of outcome assessment (detection bias)           | Low risk           | Patients, investigators, and all other staff involved in the conduct of the trial were blinded to individual treatment assignments for the duration of the study. |
| Incomplete outcome data (attrition bias)                  | Low risk           | Acceptable numbers of drop out (5% placebo, 17% pregabalin). Reasons provided (withdrawn consent, adverse events)                                                 |
| Selective reporting (reporting bias)                      | Unclear risk       | All but 2 of the secondary outcomes in the protocol have been omitted and re-analysed as "exploratory" outcomes in the final analysis.                            |
| Other bias                                                | High risk          | Majority of trial investigators had financial ties to the study sponsor                                                                                           |

**Huffman 2015****Risk of bias table**

| Bias                                                      | Authors' judgement | Support for judgement                                                                      |
|-----------------------------------------------------------|--------------------|--------------------------------------------------------------------------------------------|
| Random sequence generation (selection bias)               | Low risk           | Computer-generated codes                                                                   |
| Allocation concealment (selection bias)                   | Unclear risk       | Not described                                                                              |
| Blinding of participants and personnel (performance bias) | Unclear risk       | Not described                                                                              |
| Blinding of outcome assessment (detection bias)           | Unclear risk       | Not described                                                                              |
| Incomplete outcome data (attrition bias)                  | Low risk           | Drop-out rates not significantly different between groups. Reasons for drop-outs specified |
| Selective reporting (reporting bias)                      | Low risk           | Outcomes reported as specified in protocol                                                 |
| Other bias                                                | High risk          | All authors have, or have had financial ties to pharmaceutical industry                    |

**Kanodia 2011**

**Risk of bias table**

| Bias                                                      | Authors' judgement | Support for judgement                                                                                                   |
|-----------------------------------------------------------|--------------------|-------------------------------------------------------------------------------------------------------------------------|
| Random sequence generation (selection bias)               | Unclear risk       | Insufficient information                                                                                                |
| Allocation concealment (selection bias)                   | Unclear risk       | Insufficient information                                                                                                |
| Blinding of participants and personnel (performance bias) | Unclear risk       | States that it is a double blind trial, but there are no details of how this was performed (or who was blinded).        |
| Blinding of outcome assessment (detection bias)           | Unclear risk       | Insufficient information                                                                                                |
| Incomplete outcome data (attrition bias)                  | Unclear risk       | No details given about whether there was attrition or explanation.                                                      |
| Selective reporting (reporting bias)                      | Unclear risk       | Pre-specified outcomes in methods match those found in results. Poor reporting of outcomes from each intervention group |
| Other bias                                                | Unclear risk       | Very small sample size                                                                                                  |

**Kim 2011****Risk of bias table**

| Bias                                                      | Authors' judgement | Support for judgement                                                                                                    |
|-----------------------------------------------------------|--------------------|--------------------------------------------------------------------------------------------------------------------------|
| Random sequence generation (selection bias)               | Low risk           | Computer generated schedule                                                                                              |
| Allocation concealment (selection bias)                   | Low risk           | Centralised telorandomisation system (IMPALA)                                                                            |
| Blinding of participants and personnel (performance bias) | Unclear risk       | Matching placebo; double-blinded; unclear whether dientical in appearance                                                |
| Blinding of outcome assessment (detection bias)           | Unclear risk       | Insufficient information                                                                                                 |
| Incomplete outcome data (attrition bias)                  | Unclear risk       | Acceptable rates of drop out (15% pregabalin, 17% placebo). Reasons for discontinuation provided. ITT analysis performed |
| Selective reporting (reporting bias)                      | High risk          | Daily Sleep interference scale (DSIS) omitted as a secondary outcome.                                                    |
| Other bias                                                | High risk          | All study authors except one had financial ties to the study sponsor                                                     |



**Krcevski Škvarč 2010**

**Risk of bias table**

| Bias                                                      | Authors' judgement | Support for judgement                                                                                                                                                                                                  |
|-----------------------------------------------------------|--------------------|------------------------------------------------------------------------------------------------------------------------------------------------------------------------------------------------------------------------|
| Random sequence generation (selection bias)               | Unclear risk       | Insufficient information                                                                                                                                                                                               |
| Allocation concealment (selection bias)                   | Unclear risk       | Insufficient information                                                                                                                                                                                               |
| Blinding of participants and personnel (performance bias) | Unclear risk       | Insufficient information                                                                                                                                                                                               |
| Blinding of outcome assessment (detection bias)           | Unclear risk       | Insufficient information                                                                                                                                                                                               |
| Incomplete outcome data (attrition bias)                  | High risk          | High rates of attrition (64% pregabalin, 40% placebo). Reasons for study discontinuation provided. ITT analysis performed and reported.                                                                                |
| Selective reporting (reporting bias)                      | Low risk           | Outcomes specified in the methods match those reported in the results                                                                                                                                                  |
| Other bias                                                | Unclear risk       | Some differences in baseline characteristics; proportion taking antiviral therapy higher in pregabalin group, differences in distribution of zoster and severity of rash. The study authors had no competing interests |

1  
2  
3 **Lesser 2004**  
4

5  
6 **Risk of bias table**  
7

| Bias                                                      | Authors' judgement | Support for judgement                                                                                                                                                                                                                                 |
|-----------------------------------------------------------|--------------------|-------------------------------------------------------------------------------------------------------------------------------------------------------------------------------------------------------------------------------------------------------|
| Random sequence generation (selection bias)               | Unclear risk       | Insufficient information as to how it was generated                                                                                                                                                                                                   |
| Allocation concealment (selection bias)                   | Low risk           | Code was maintained by the Clinical Pharmacy Operations department, with no access by other individuals or departments. Medication was shipped to the sites in blocks in unit-dose trays. Each patient was assigned the next sequential random number |
| Blinding of participants and personnel (performance bias) | Unclear risk       | Each patient took one small and two larger capsules, with the proper mix of active medication and placebo, for each dose to achieve double-blinding. Does not specify that the active intervention and placebo were identical                         |
| Blinding of outcome assessment (detection bias)           | Low risk           | Blinding was maintained until all decisions regarding data evaluability were made                                                                                                                                                                     |
| Incomplete outcome data (attrition bias)                  | Unclear risk       | Low drop out rates (8% placebo, 11% PGB). Only states that 18/35 dropouts were due to adverse events.                                                                                                                                                 |
| Selective reporting (reporting bias)                      | Low risk           | Pre-specified outcomes in methods match those found in results.                                                                                                                                                                                       |
| Other bias                                                | High risk          | Baseline characteristics: more people in placebo group taking antidiabetic medication (insulin) compared to PGB group. More T1DM and T2DM in placebo group. The study authors had financial ties to the sponsor.                                      |

**Liu 2015****Risk of bias table**

| Bias                                                      | Authors' judgement | Support for judgement                                                                                             |
|-----------------------------------------------------------|--------------------|-------------------------------------------------------------------------------------------------------------------|
| Random sequence generation (selection bias)               | Unclear risk       | Insufficient information                                                                                          |
| Allocation concealment (selection bias)                   | Low risk           | Interactive voice response system                                                                                 |
| Blinding of participants and personnel (performance bias) | Unclear risk       | Placebo was matched to pregabalin. Not specified whether active and placebo pills were identical in appearance    |
| Blinding of outcome assessment (detection bias)           | Unclear risk       | Insufficient information.                                                                                         |
| Incomplete outcome data (attrition bias)                  | Low risk           | Acceptable drop out rates (12% pregabalin, 16% placebo). Reasons for withdrawal provided. ITT analysis performed. |
| Selective reporting (reporting bias)                      | High risk          | Omitted pre-specified secondary outcomes relating to the HADS Anxiety and Depression score.                       |
| Other bias                                                | Unclear risk       | Two authors had financial ties to the study sponsor                                                               |

**Mathieson 2017****Risk of bias table**

| <b>Bias</b>                                               | <b>Authors' judgement</b> | <b>Support for judgement</b>                                                                                                                                                                                                                                                                    |
|-----------------------------------------------------------|---------------------------|-------------------------------------------------------------------------------------------------------------------------------------------------------------------------------------------------------------------------------------------------------------------------------------------------|
| Random sequence generation (selection bias)               | Low risk                  | Computer-derived random-number sequence                                                                                                                                                                                                                                                         |
| Allocation concealment (selection bias)                   | Low risk                  | Packaged in white, opaque, sealed containers                                                                                                                                                                                                                                                    |
| Blinding of participants and personnel (performance bias) | Unclear risk              | Pregabalin capsules and matching placebo capsules. Unclear whether they were identical in appearance                                                                                                                                                                                            |
| Blinding of outcome assessment (detection bias)           | Low risk                  | Some outcomes were assessed by means of telephone contact with the patients by trained trial researchers, but reports that all the research staff, statisticians, trial clinicians, and patients were unaware of the trial-group assignments during recruitment, data collection, and analysis. |
| Incomplete outcome data (attrition bias)                  | Low risk                  | Acceptable number of drop outs (16% pregabalin, 14% placebo). Reasons provided. ITT analysis performed (although it did not include 2 randomised patients).                                                                                                                                     |
| Selective reporting (reporting bias)                      | High risk                 | The primary outcome was measured at fewer time points than was specified in the protocol which specified pain intensity would be measured at baseline then weeks 2,4,8,12,26 and 52. Study reported pain only at weeks 8, 52. All other outcomes remained the same as pre-specified.            |
| Other bias                                                | Unclear risk              | Some differences in baseline characteristics, such as sex, dermatomal pain, neurologic deficit, clinically suspected level of spine associated with leg pain, and PainDETECT scores. Three authors had financial ties to the pharmaceutical industry                                            |

1  
2  
3  
4  
5  
6  
7  
8  
9  
10  
11  
12  
13  
14  
15  
16  
17  
18  
19  
20  
21  
22  
23  
24  
25  
26  
27  
28  
29  
30  
31  
32  
33  
34  
35  
36  
37  
38  
39  
40  
41  
42  
43  
44  
45  
46

**Moon 2010**

**Risk of bias table**

| Bias                                                      | Authors' judgement | Support for judgement                                                                                                                     |
|-----------------------------------------------------------|--------------------|-------------------------------------------------------------------------------------------------------------------------------------------|
| Random sequence generation (selection bias)               | Low risk           | Computerized tele-randomization system                                                                                                    |
| Allocation concealment (selection bias)                   | Low risk           | Central web–telephone software                                                                                                            |
| Blinding of participants and personnel (performance bias) | Low risk           | Mentions double-blinded; "pregabalin and matching placebo"                                                                                |
| Blinding of outcome assessment (detection bias)           | Low risk           | Study report does not specify, although protocol states that the outcome assessors were blinded.                                          |
| Incomplete outcome data (attrition bias)                  | Unclear risk       | Uneven numbers of drop out (14.8% pregabalin, 20.5% placebo), however reasons for drop out provided. ITT analysis performed and reported. |
| Selective reporting (reporting bias)                      | Low risk           | All pre-specified outcomes in protocol reported.                                                                                          |
| Other bias                                                | Unclear risk       | The authors fail to declare whether they had financial ties to Pfizer.                                                                    |

1  
2  
3 **Rauck 2013**  
4

5 **Risk of bias table**  
6  
7

| Bias                                                      | Authors' judgement | Support for judgement                                                                                                                                                               |
|-----------------------------------------------------------|--------------------|-------------------------------------------------------------------------------------------------------------------------------------------------------------------------------------|
| Random sequence generation (selection bias)               | Low risk           | Computer-generated sequence                                                                                                                                                         |
| Allocation concealment (selection bias)                   | Low risk           | Drug containers of identical appearance                                                                                                                                             |
| Blinding of participants and personnel (performance bias) | Low risk           | PGB was provided with identical-in-appearance placebo capsules to ensure blinding of subjects and investigators. All tablets were provided by an unblinded, third-party pharmacist. |
| Blinding of outcome assessment (detection bias)           | Low risk           | Study does not provide sufficient information, although trial protocol does state that the outcome assessors were blinded.                                                          |
| Incomplete outcome data (attrition bias)                  | Unclear risk       | Reasons for dropout reported although attrition rates were 29% for pregabalin and 25% for placebo.                                                                                  |
| Selective reporting (reporting bias)                      | Low risk           | Reports all pre-specified outcomes from the protocol.                                                                                                                               |
| Other bias                                                | High risk          | The authors had financial ties to the sponsor                                                                                                                                       |

**Richter 2005**

**Risk of bias table**

| Bias                                                      | Authors' judgement | Support for judgement                                                                                                                                                      |
|-----------------------------------------------------------|--------------------|----------------------------------------------------------------------------------------------------------------------------------------------------------------------------|
| Random sequence generation (selection bias)               | Low risk           | computer generated sequence                                                                                                                                                |
| Allocation concealment (selection bias)                   | Unclear risk       | Insufficient information                                                                                                                                                   |
| Blinding of participants and personnel (performance bias) | Low risk           | Study capsules were identical (doses were also matched to size of tablets for both pregabalin and placebo)                                                                 |
| Blinding of outcome assessment (detection bias)           | Unclear risk       | Blind was maintained until completion of study and data evaluability determination however does not specify whether outcome assessors or other investigators were blinded. |
| Incomplete outcome data (attrition bias)                  | Low risk           | Acceptable attrition rates (15% placebo, 5% PGB 150mg/d, 12% PGB 600mg/d [overall 9% pregabalin]). Reasons for drop out provided.                                          |
| Selective reporting (reporting bias)                      | Low risk           | Outcomes specified in the Methods match those reported in the results.                                                                                                     |
| Other bias                                                | High risk          | Two-thirds of the authors had financial ties to the study sponsor                                                                                                          |

1  
2  
3 **Rosenstock 2004**  
4

5 **Risk of bias table**  
6  
7

| Bias                                                      | Authors' judgement | Support for judgement                                                                                                                                                                   |
|-----------------------------------------------------------|--------------------|-----------------------------------------------------------------------------------------------------------------------------------------------------------------------------------------|
| Random sequence generation (selection bias)               | Unclear risk       | Sequential randomization numbers according to a randomization schedule designed to attain an even distribution between pregabalin and placebo. Unclear how this sequence was generated. |
| Allocation concealment (selection bias)                   | Low risk           | Study medication was packaged and labeled with sequential randomization numbers.                                                                                                        |
| Blinding of participants and personnel (performance bias) | Unclear risk       | All medications were packaged in blinded fashion. Not specified whether the active intervention and placebo were identical in appearance                                                |
| Blinding of outcome assessment (detection bias)           | Unclear risk       | Insufficient information                                                                                                                                                                |
| Incomplete outcome data (attrition bias)                  | Low risk           | Acceptable attrition rates (14% pregabalin, 11% placebo). Reasons for withdrawal provided. ITT analysis performed.                                                                      |
| Selective reporting (reporting bias)                      | Low risk           | Outcomes specified in the Methods match those reported in the results.                                                                                                                  |
| Other bias                                                | Unclear risk       | The authors did not state whether they had any competing interests                                                                                                                      |



**Sabatowski 2004**

**Risk of bias table**

| Bias                                                      | Authors' judgement | Support for judgement                                                                                                                                                                                                                                            |
|-----------------------------------------------------------|--------------------|------------------------------------------------------------------------------------------------------------------------------------------------------------------------------------------------------------------------------------------------------------------|
| Random sequence generation (selection bias)               | Low risk           | Computer-generated code                                                                                                                                                                                                                                          |
| Allocation concealment (selection bias)                   | Low risk           | Study medication was packaged and labeled with sequential randomisation numbers                                                                                                                                                                                  |
| Blinding of participants and personnel (performance bias) | Unclear risk       | All medications were blinded and taken orally. Placebo capsules were identical in appearance to capsules containing active drug. However, an investigator could break the randomisation code and, thus, the blind for a patient if a medical emergency occurred. |
| Blinding of outcome assessment (detection bias)           | Unclear risk       | Insufficient information                                                                                                                                                                                                                                         |
| Incomplete outcome data (attrition bias)                  | Unclear risk       | Reasons for dropout provided, however unequal attrition rates across the groups (12.3% PGB 150mg/d, 21.1% PGB 300mg/d, Overall PGB 16.6%, 24.7% Placebo). Both ITT and PPA reported but ITT value used in abstract.                                              |
| Selective reporting (reporting bias)                      | Unclear risk       | Results of CGIC are not reported, just states that it shows a "statistically significant improvement".                                                                                                                                                           |
| Other bias                                                | High risk          | Majority of the investigators had financial ties to the study sponsor                                                                                                                                                                                            |

1  
2  
3 **Satoh 2011**  
4

5 **Risk of bias table**  
6  
7

| Bias                                                      | Authors' judgement | Support for judgement                                                                                                                                                             |
|-----------------------------------------------------------|--------------------|-----------------------------------------------------------------------------------------------------------------------------------------------------------------------------------|
| Random sequence generation (selection bias)               | High risk          | Allocation based on the results of a laboratory test (CrCl)                                                                                                                       |
| Allocation concealment (selection bias)                   | Low risk           | Centrally organised using a validated web-based system.                                                                                                                           |
| Blinding of participants and personnel (performance bias) | Unclear risk       | Insufficient information                                                                                                                                                          |
| Blinding of outcome assessment (detection bias)           | Unclear risk       | Insufficient information                                                                                                                                                          |
| Incomplete outcome data (attrition bias)                  | High risk          | Unequal dropout across the groups (11.8% placebo, 14.7% 300 mg/day PGB, 28.9% in the 600 mg/day PGB). All reasons for attrition were not provided.                                |
| Selective reporting (reporting bias)                      | High risk          | Secondary outcome added in published study: patient impression of subjective symptoms (including numbness, pain and paraesthesia) which showed favourable results for pregabalin. |
| Other bias                                                | High risk          | All authors had financial ties to the study sponsor                                                                                                                               |

Shabbir 2011

Risk of bias table

| Bias                                                      | Authors' judgement | Support for judgement                                                                                                                                                                                                                                     |
|-----------------------------------------------------------|--------------------|-----------------------------------------------------------------------------------------------------------------------------------------------------------------------------------------------------------------------------------------------------------|
| Random sequence generation (selection bias)               | Unclear risk       | Insufficient information                                                                                                                                                                                                                                  |
| Allocation concealment (selection bias)                   | Unclear risk       | Insufficient information                                                                                                                                                                                                                                  |
| Blinding of participants and personnel (performance bias) | Unclear risk       | Insufficient information                                                                                                                                                                                                                                  |
| Blinding of outcome assessment (detection bias)           | Unclear risk       | Insufficient information                                                                                                                                                                                                                                  |
| Incomplete outcome data (attrition bias)                  | Low risk           | <u>Appears to be no attrition from either of the randomised groups.</u>                                                                                                                                                                                   |
| Selective reporting (reporting bias)                      | Low risk           | Outcomes specified in the methods match those reported in the results.                                                                                                                                                                                    |
| Other bias                                                | High risk          | Baseline characteristics table not provided to compare across the intervention arms. Pregabalin was administered twice daily; daily frequency of placebo administration not specified. The authors did not state whether they had any competing interests |

1  
2  
3 **Siddall 2006**  
4

5 **Risk of bias table**  
6  
7

| Bias                                                      | Authors' judgement | Support for judgement                                                                                                           |
|-----------------------------------------------------------|--------------------|---------------------------------------------------------------------------------------------------------------------------------|
| Random sequence generation (selection bias)               | Low risk           | Computer generated                                                                                                              |
| Allocation concealment (selection bias)                   | Low risk           | Study medication was packaged and labeled with sequential randomization numbers according to the randomization schedule         |
| Blinding of participants and personnel (performance bias) | Low risk           | Medication was blinded by using capsules of identical size, color, taste, and smell for placebo and pregabalin                  |
| Blinding of outcome assessment (detection bias)           | Unclear risk       | Insufficient information                                                                                                        |
| Incomplete outcome data (attrition bias)                  | Unclear risk       | High (and uneven) attrition rates: pregabalin 30%, placebo 45%. Reasons for withdrawal provided. ITT analysis results reported. |
| Selective reporting (reporting bias)                      | Low risk           | Outcomes specified in the Methods match those reported in the results.                                                          |
| Other bias                                                | High risk          | All trial investigators had financial ties to the study sponsor                                                                 |

**Simpson 2010**

**Risk of bias table**

| Bias                                                      | Authors' judgement | Support for judgement                                                                                                                                          |
|-----------------------------------------------------------|--------------------|----------------------------------------------------------------------------------------------------------------------------------------------------------------|
| Random sequence generation (selection bias)               | Low risk           | Computer-generated sequence                                                                                                                                    |
| Allocation concealment (selection bias)                   | Low risk           | Central computerized telerandomization system, ensured that investigators remained blinded to treatment assignments during the study                           |
| Blinding of participants and personnel (performance bias) | Low risk           | Study drug and placebo were identical in appearance in order to preserve blinding.                                                                             |
| Blinding of outcome assessment (detection bias)           | Low risk           | Study does not provide sufficient information, although trial protocol does state that the outcome assessors were blinded.                                     |
| Incomplete outcome data (attrition bias)                  | Low risk           | Similar rates of attrition (21% pregabalin, 19% placebo). Reasons for drop out provided, however not all randomised patients are included in the ITT analysis. |
| Selective reporting (reporting bias)                      | High risk          | Prespecified outcomes (assessing QANeP) omitted in final study. Safety outcomes not prespecified in protocol added to final study.                             |
| Other bias                                                | High risk          | All trial investigators had, or have had financial ties to the study sponsor                                                                                   |

1  
2  
3 **Simpson 2014**  
4

5 **Risk of bias table**  
6  
7

| Bias                                                      | Authors' judgement | Support for judgement                                                                                                                                                  |
|-----------------------------------------------------------|--------------------|------------------------------------------------------------------------------------------------------------------------------------------------------------------------|
| Random sequence generation (selection bias)               | Unclear risk       | Computer generated "pseudorandom" code                                                                                                                                 |
| Allocation concealment (selection bias)                   | Low risk           | Automated telorandomization system.                                                                                                                                    |
| Blinding of participants and personnel (performance bias) | Low risk           | Patients were randomised in a double blind fashion through study sponsors sysetm for randomization and dispensing.                                                     |
| Blinding of outcome assessment (detection bias)           | Unclear risk       | Participants, investigators and study sponsor personnel were blinded to interventions after treatment assignment, but unclear whether this includes outcome assessors. |
| Incomplete outcome data (attrition bias)                  | High risk          | Reasons provided for drop outs though there is a high attrition rate (31% pregabalin, 31% placebo).                                                                    |
| Selective reporting (reporting bias)                      | Low risk           | Outcomes specified in the protocol match those reported in the study.                                                                                                  |
| Other bias                                                | High risk          | Study prematurely terminated by Pfizer following unfavourable results. All trial investigators had financial ties to the study sponsor                                 |

**Stacey 2008**

**Risk of bias table**

| Bias                                                      | Authors' judgement | Support for judgement                                                                                                                                 |
|-----------------------------------------------------------|--------------------|-------------------------------------------------------------------------------------------------------------------------------------------------------|
| Random sequence generation (selection bias)               | Unclear risk       | Insufficient information                                                                                                                              |
| Allocation concealment (selection bias)                   | Unclear risk       | Insufficient information                                                                                                                              |
| Blinding of participants and personnel (performance bias) | Unclear risk       | Insufficient information; reports double-blinded but unclear who is blinded.                                                                          |
| Blinding of outcome assessment (detection bias)           | Unclear risk       | Insufficient information                                                                                                                              |
| Incomplete outcome data (attrition bias)                  | Unclear risk       | Rates of attrition are not comparable across the groups (5.5% flexible dose PGB, 20.5% fixed dose PGB, 16.7% Placebo). Reasons for drop out provided. |
| Selective reporting (reporting bias)                      | Low risk           | Outcomes specified in the methods match those reported in the results.                                                                                |
| Other bias                                                | High risk          | All authors had financial ties to the study sponsor                                                                                                   |

1  
2  
3 **Tolle 2008**  
4

5 **Risk of bias table**  
6  
7

| Bias                                                      | Authors' judgement | Support for judgement                                                                                                                                                                         |
|-----------------------------------------------------------|--------------------|-----------------------------------------------------------------------------------------------------------------------------------------------------------------------------------------------|
| Random sequence generation (selection bias)               | Unclear risk       | Insufficient information                                                                                                                                                                      |
| Allocation concealment (selection bias)                   | Unclear risk       | Insufficient information                                                                                                                                                                      |
| Blinding of participants and personnel (performance bias) | Unclear risk       | Insufficient information                                                                                                                                                                      |
| Blinding of outcome assessment (detection bias)           | Unclear risk       | Insufficient information                                                                                                                                                                      |
| Incomplete outcome data (attrition bias)                  | Low risk           | Similar attrition rates across the groups (Placebo 17.7%, PGB 150mg/d 17.2%, PGB 300mg/d 20.2%, PGB 300/600mg/d 22.8%). Reasons for withdrawal provided. ITT analysis performed and reported. |
| Selective reporting (reporting bias)                      | High risk          | EuroQoL Health Utilities Index not reported in final results (although mentioned in the abstract and methods).                                                                                |
| Other bias                                                | High risk          | All authors had financial ties to the study sponsor                                                                                                                                           |



van Seventer 2006

Risk of bias table

| Bias                                                      | Authors' judgement | Support for judgement                                                                                                                                                         |
|-----------------------------------------------------------|--------------------|-------------------------------------------------------------------------------------------------------------------------------------------------------------------------------|
| Random sequence generation (selection bias)               | Unclear risk       | Insufficient information                                                                                                                                                      |
| Allocation concealment (selection bias)                   | Unclear risk       | Insufficient information                                                                                                                                                      |
| Blinding of participants and personnel (performance bias) | Unclear risk       | Insufficient information although states double-blinded.                                                                                                                      |
| Blinding of outcome assessment (detection bias)           | Unclear risk       | Insufficient information                                                                                                                                                      |
| Incomplete outcome data (attrition bias)                  | Unclear risk       | High attrition rates across the groups (36.6% placebo, 29.9% PGB 150mg/d, 36.7% PGB 300mg/d, 36.6% PGB 300/600mg/d). Reasons for withdrawal provided. ITT analysis performed. |
| Selective reporting (reporting bias)                      | Low risk           | Outcomes specified in the methods match those reported in the results.                                                                                                        |
| Other bias                                                | High risk          | All study authors had financial ties to the study sponsor                                                                                                                     |

1  
2  
3 **van Seventer 2010**  
4

5  
6 **Risk of bias table**  
7

| Bias                                                      | Authors' judgement | Support for judgement                                                                                                                                                                                                                                                                                                                                                                                                                                                                                                   |
|-----------------------------------------------------------|--------------------|-------------------------------------------------------------------------------------------------------------------------------------------------------------------------------------------------------------------------------------------------------------------------------------------------------------------------------------------------------------------------------------------------------------------------------------------------------------------------------------------------------------------------|
| Random sequence generation (selection bias)               | Unclear risk       | Insufficient information.                                                                                                                                                                                                                                                                                                                                                                                                                                                                                               |
| Allocation concealment (selection bias)                   | Low risk           | An Interactive Voice Recognition System was used.                                                                                                                                                                                                                                                                                                                                                                                                                                                                       |
| Blinding of participants and personnel (performance bias) | Low risk           | Medication was blinded by using capsules of identical size, color, taste and smell for placebo, and pregabalin.                                                                                                                                                                                                                                                                                                                                                                                                         |
| Blinding of outcome assessment (detection bias)           | Low risk           | Trial protocol specifies that outcome assessor was blinded.                                                                                                                                                                                                                                                                                                                                                                                                                                                             |
| Incomplete outcome data (attrition bias)                  | Low risk           | Reasons for discontinuation provided, attrition rates comparable across the groups- 24.4% for pregabalin, 22.8% for placebo. ITT analysis performed (although excluded one patient from each group due to lack of post-baseline data).                                                                                                                                                                                                                                                                                  |
| Selective reporting (reporting bias)                      | High risk          | Protocol specified CGIC a secondary outcome however this was omitted in published report. Other omitted outcomes include Pain Treatment Satisfaction Scale (PTSS)- Impact of current pain medication, satisfaction with current pain medication, medication characteristics, efficacy; Neuropathic Pain Symptom Inventory total intensity score, Medical Outcome Study Cognitive Subscale (reasoning, concentration, confusion, memory, attention, thinking); Davidson Trauma scale (severity, frequency, total score). |
| Other bias                                                | High risk          | All study authors had financial ties to the study sponsor                                                                                                                                                                                                                                                                                                                                                                                                                                                               |

**Vranken 2008**

**Risk of bias table**

| Bias                                                      | Authors' judgement | Support for judgement                                                                                                                                                                              |
|-----------------------------------------------------------|--------------------|----------------------------------------------------------------------------------------------------------------------------------------------------------------------------------------------------|
| Random sequence generation (selection bias)               | Low risk           | Randomized according to the automated assignment system                                                                                                                                            |
| Allocation concealment (selection bias)                   | Low risk           | Hospital pharmacist prepared identical, coded medication bottles containing identical capsules of pregabalin or placebo. Unclear if pharmacist was otherwise involved in the study or third party. |
| Blinding of participants and personnel (performance bias) | Low risk           | Coded medication bottle was supplied by hospital pharmacist to the blinded treating physician. Medication bottle contained identical capsules.                                                     |
| Blinding of outcome assessment (detection bias)           | Unclear risk       | Insufficient information                                                                                                                                                                           |
| Incomplete outcome data (attrition bias)                  | Low risk           | Reasonable rates of attrition (15% pregabalin, 20% of placebo). Reasons for discontinuation provided.                                                                                              |
| Selective reporting (reporting bias)                      | Low risk           | Outcomes specified in the methods match those reported in the results.                                                                                                                             |
| Other bias                                                | Unclear risk       | Some differences in baseline characteristics including site of pain and concomitant therapies. The authors did not report whether they had any competing interests                                 |

**Appendix Table 1: Benefits and harms of pregabalin in the management of neuropathic pain**

| Outcome                                        | Overall analysis                                                        | Subgroup analyses                                                      |                                                                          | Test for subgroup differences   |
|------------------------------------------------|-------------------------------------------------------------------------|------------------------------------------------------------------------|--------------------------------------------------------------------------|---------------------------------|
|                                                |                                                                         | Central neuropathic pain                                               | Peripheral neuropathic pain                                              |                                 |
| Mean change in pain scores - NRS               | (n = 5093): SMD -0.49 (-0.66 to -0.32, P < 0.00001, I <sup>2</sup> =88% | (n = 785): SMD -0.38 (-0.80 to 0.04), P = 0.08, I <sup>2</sup> =89%    | (n = 4308): SMD -0.52 (-0.71 to -0.33), P < 0.00001, I <sup>2</sup> =88% | P = 0.56, I <sup>2</sup> =0%    |
| Mean change in sleep interference scores - NRS | (n = 1641): SMD -0.38 (-0.50 to -0.26, P < 0.00001, I <sup>2</sup> =32% | (n = 357): SMD -0.49 (-0.70 to -0.28), P < 0.00001, I <sup>2</sup> =0% | (n = 1284): SMD -0.35 (-0.50 to -0.19), P < 0.0001, I <sup>2</sup> =45%  | P = 0.30, I <sup>2</sup> =8%    |
| Mean change in HADS-anxiety scores             | (n = 1041): SMD -0.12 (-0.29 to 0.04, P = 0.14, I <sup>2</sup> =44%     | (n = 418): SMD -0.27 (-0.46 to -0.08, P = 0.006, I <sup>2</sup> =0%    | (n = 623): SMD -0.00 (-0.16 to 0.15, P = 0.97, I <sup>2</sup> =0%        | P = 0.04, I <sup>2</sup> =77.2% |
| Mean change in HADS-depression scores          | (n = 1041): SMD -0.06 (-0.26 to 0.13, P = 0.54, I <sup>2</sup> =60%     | (n = 418): SMD -0.16 (-0.41 to 0.10, P = 0.23, I <sup>2</sup> =44%     | (n = 623): SMD 0.02 (-0.28 to 0.32, P = 0.90, I <sup>2</sup> =71%        | P = 0.38, I <sup>2</sup> =8%    |
| Overall adverse events                         | (n = 4010): RR 1.33 (1.23 to 1.44), P < 0.00001, I <sup>2</sup> =52%    | (n = 489): RR 1.33 (1.20 to 1.47), P < 0.00001, I <sup>2</sup> =0%     | (n = 3225): RR 1.34 (1.21 to 1.47), P < 0.00001, I <sup>2</sup> =61%     | P = 0.92, I <sup>2</sup> =0%    |
| Adverse event: weight gain                     | (n = 3636): RR 4.58, (2.88 to 7.28), P < 0.00001, I <sup>2</sup> =0%    | (n = 428): RR 3.77 (0.94 to 15.08), P = 0.06, I <sup>2</sup> =0%       | (n = 3636): RR 4.69 (2.87 to 7.68), P < 0.00001, I <sup>2</sup> =0%      | P = 0.77, I <sup>2</sup> =0%    |
| Adverse event: somnolence                      | (n = 5695): RR 2.84, (2.36 to 3.42), P < 0.00001, I <sup>2</sup> =0%    | (n = 785): RR 3.18 (2.16 to 4.68), P < 0.00001, I <sup>2</sup> =0%     | (n = 4910): RR 2.74 (2.22 to 3.40), P < 0.00001, I <sup>2</sup> =1%      | P = 0.51, I <sup>2</sup> =0%    |
| Adverse event: dizziness                       | (n = 5732): RR 2.94 (2.30 to 3.74), P < 0.00001, I <sup>2</sup> =63%    | (n = 785): RR 3.38 (2.46 to 4.63), P < 0.00001, I <sup>2</sup> =0%     | (n = 4947): RR 2.89 (2.17 to 3.85), P < 0.00001, I <sup>2</sup> =67%     | P = 0.48, I <sup>2</sup> =0%    |
| Adverse event: peripheral edema                | (n = 5001): RR 2.63 (1.86 to 3.73), P < 0.00001, I <sup>2</sup> =41%    | (n = 439): RR 3.90 (1.63 to 9.36), P = 0.002, I <sup>2</sup> =0%       | (n = 4562): RR 2.53 (1.74 to 3.68), P < 0.00001, I <sup>2</sup> =44%     | P = 0.37, I <sup>2</sup> =0%    |
| Adverse event: fatigue*                        | (n = 3958): RR 1.83 (1.32 to 2.54), P = 0.0003, I <sup>2</sup> =14%     | N/A                                                                    | N/A                                                                      | N/A                             |
| Adverse event: visual disturbance              | (n = 2814): RR 2.50 (1.53 to 4.09), P = 0.0003, I <sup>2</sup> =6%      | (n = 566): RR 4.05 (1.27 to 12.91), P = 0.02, I <sup>2</sup> =0%       | (n = 2248): RR 2.36 (1.32 to 4.22), P = 0.004, I <sup>2</sup> =16%       | P = 0.42, I <sup>2</sup> =0%    |
| Adverse event: ataxia**                        | (n = 1045): RR 5.49 (1.84 to 16.36), P = 0.002, I <sup>2</sup> =0%      | N/A                                                                    | N/A                                                                      | N/A                             |
| Adverse event: dry mouth                       | (n = 3873): RR 2.39 (1.66 to 3.44), P < 0.0001, I <sup>2</sup> =16%     | (n = 357): RR 3.75 (1.43 to 9.83), P = 0.007, I <sup>2</sup> =0%       | (n = 3516): RR 2.28 (1.52 to 3.41), P < 0.0001, I <sup>2</sup> =20%      | P = 0.35, I <sup>2</sup> =0%    |
| Adverse event: non-peripheral edema            | (n = 2337): RR 3.51 (1.93 to 6.40), P < 0.0001, I <sup>2</sup> =0%      | (n = 785): RR 3.82 (1.65 to 8.85), P = 0.002, I <sup>2</sup> =0%       | (n = 1552): RR 3.70 (1.36 to 10.06), P = 0.01, I <sup>2</sup> =19%       | P = 0.96, I <sup>2</sup> =0%    |
| Adverse event: vertigo**                       | (n = 1031): RR 3.08 (1.01 to 9.40), P = 0.05, I <sup>2</sup> =30%       | N/A                                                                    | N/A                                                                      | N/A                             |
| Adverse event: euphoria*                       | (n = 1274): RR 8.80 (2.72 to 28.54), P = 0.0003, I <sup>2</sup> =0%     | N/A                                                                    | N/A                                                                      | N/A                             |
| Discontinuation due to adverse events          | (n = 5426): RR 1.91 (1.54 to 2.37), P < 0.00001, I <sup>2</sup> =0%     | (n = 576): RR 1.42 (0.79 to 2.55), P = 0.24, I <sup>2</sup> =0%        | (n = 4850): RR 2.00 (1.58 to 2.55), P < 0.00001, I <sup>2</sup> =6%      | P = 0.29, I <sup>2</sup> =12%   |

Abbreviations: HADS: Hospital anxiety depression scale; NRS: Numerical rating scale; RR: Risk ratio; SMD: Standardized mean difference

\*only one RCT on central neuropathic pain reported adequate data

\*\*all RCTs were in patients with peripheral neuropathic pain

1  
2  
3  
4  
5  
6  
7  
8  
9  
10  
11  
12  
13  
14  
15  
16  
17  
18  
19  
20  
21  
22  
23  
24  
25  
26  
27  
28  
29  
30  
31  
32  
33  
34  
35  
36  
37  
38  
39  
40  
41  
42  
43  
44  
45  
46  
47

For peer review only

1  
2  
3  
4**Appendix Table 2: Sensitivity analyses by study quality and duration in clinical trials assessing the benefits and harms of pregabalin in neuropathic pain**

| Outcome                               | Sensitivity analysis based on higher quality studies*                          | Sensitivity analysis based on shorter duration of intervention**                    | Sensitivity analysis based on longer duration of intervention***                   |
|---------------------------------------|--------------------------------------------------------------------------------|-------------------------------------------------------------------------------------|------------------------------------------------------------------------------------|
| Pain                                  | 5 studies (n = 932): SMD -0.56 (-1.07 to -0.05; P = 0.03; I <sup>2</sup> =92%) | 10 studies (n = 2408): SMD -0.68 (-0.96 to -0.40; P < 0.00001; I <sup>2</sup> =90%) | 10 studies (n = 2685): SMD -0.31 (-0.49 to -0.13; P = 0.0006; I <sup>2</sup> =79%) |
| Adverse events                        | 6 studies (n = 1152): RR 1.17 (1.06 to 1.29; P = 0.002; I <sup>2</sup> =23%)   | 11 studies (n = 2088): RR 1.46 (1.34 to 1.58; P < 0.00001; I <sup>2</sup> =0%)      | 8 studies (n = 1922): RR 1.23 (1.12 to 1.35; P < 0.0001; I <sup>2</sup> =55%)      |
| Serious adverse events                | 3 studies (n = 627): RR 0.59 (0.38 to 0.92; P = 0.02; I <sup>2</sup> =0%)      | 8 studies (n = 2088): RR 0.72 (0.49 to 1.07; P = 0.11; I <sup>2</sup> =0%)          | 7 studies (n = 1674): RR 0.93 (0.55 to 1.59; P = 0.79; I <sup>2</sup> =26%)        |
| Discontinuation due to adverse events | 6 studies (n = 1152): RR 1.22 (0.79 to 1.87; P = 0.37; I <sup>2</sup> =0%)     | 13 studies (n = 2403): RR 1.95 (1.34 to 2.84; P = 0.0005; I <sup>2</sup> =27%)      | 11 studies (n = 3023): RR 1.88 (1.40 to 2.53; P < 0.0001; I <sup>2</sup> =0%)      |

19  
20 Studies that adequately reported randomization and blinding procedures

21 \*Studies duration lasting less than 12 weeks

22 \*\*Studies duration lasting at least 12 weeks

23

24

25

26

27

28

29

30

31

32

33

34

35

36

37

38

39

40

41

42

43

44

45

46

Appendix Table 3: Main results\* of RCTs assessing the benefits and harms of pregabalin in the management of neuropathic pain

| Study ID                                                 | Pain                  |                                                                                                                                |                                                                                                                | Sleep Disturbance                                                                                                       |                                                                                     | Quality of Life (EQ-5D)                                                                                                                                         | PGIC                                                                                                                                                                                         | CGIC                                                                                    |
|----------------------------------------------------------|-----------------------|--------------------------------------------------------------------------------------------------------------------------------|----------------------------------------------------------------------------------------------------------------|-------------------------------------------------------------------------------------------------------------------------|-------------------------------------------------------------------------------------|-----------------------------------------------------------------------------------------------------------------------------------------------------------------|----------------------------------------------------------------------------------------------------------------------------------------------------------------------------------------------|-----------------------------------------------------------------------------------------|
|                                                          | NRS                   | VAS Score                                                                                                                      | SF-MPQ VAS                                                                                                     | SF-MPQ PPI                                                                                                              | Sleep Interference Scores                                                           |                                                                                                                                                                 |                                                                                                                                                                                              |                                                                                         |
| 10<br>11<br>12<br>13<br>14<br>15<br>16<br>17<br>18<br>19 | Orizzo 2008           |                                                                                                                                | Significantly favoured PGB over PLA (MD -11.06, 95% CI, -18.89 to -3.22; P = 0.006)                            |                                                                                                                         |                                                                                     |                                                                                                                                                                 | Significant improvement with PGB compared to PLA, P= 0.002                                                                                                                                   |                                                                                         |
| 20<br>21<br>22<br>23                                     | Cardenas 2013         |                                                                                                                                |                                                                                                                |                                                                                                                         |                                                                                     | Significant improvement with PGB over PLA on domains of sleep disturbance, awaken short of breath, sleep quantity, and optimal seep subscales (P<0.05)          | PGIC reported as binary outcome; significantly improved with PGB compared with PLA, P<0.001                                                                                                  | Significant improvement in the PGB arm (P= 0.0294)                                      |
| 24<br>25<br>26                                           | Dworkin 2003          |                                                                                                                                | Significantly favoured PGB over PLA (MD -17.62, 95% CI, -25.37 to -9.86; P = 0.0001)                           |                                                                                                                         | Significantly favoured PGB over PLA (MD -1.58, 95% CI, -2.19 to -0.97; P = 0.0001)  | Significantly favoured PGB over PLA (MD -9.80, 95% CI, -14.49 to -5.11; P = 0.0001)                                                                             | Significantly improved with PGB versus PLA, P = 0.001                                                                                                                                        |                                                                                         |
| 27<br>28<br>29                                           | Dreyenhagen 2005      | Both flexible- and fixed-dose PGB significantly reduced endpoint mean pain score versus PLA (P=0.002 and P<0.001 respectively) |                                                                                                                |                                                                                                                         | Significantly improved at endpoint in each PGB treatment group over PLA (P<0.001)   | Significantly favoured PGB over PLA (P<0.05)                                                                                                                    |                                                                                                                                                                                              |                                                                                         |
| 30<br>31<br>32                                           | Huan 2011             |                                                                                                                                | Significantly improved with PGB vs PLA LSMD -6.56, 95% CI -11.65 to -1.47, P=0.012                             |                                                                                                                         | Significantly improved with PGB vs PLA: LSMD -0.5, 95% CI -0.93 to -0.07, P=0.023   |                                                                                                                                                                 |                                                                                                                                                                                              |                                                                                         |
| 33<br>34<br>35                                           | Holbech 2015          |                                                                                                                                |                                                                                                                |                                                                                                                         | Significantly improved with PGB vs PLA LSMD -0.55, 95% CI -0.93 to -0.17, P=0.004   |                                                                                                                                                                 |                                                                                                                                                                                              |                                                                                         |
| 36<br>37<br>38<br>39                                     | Huffmann 2015         | Significant treatment difference favouring PGB over PLA for DPN pain (P=0.034) and DPN pain on walking (P=0.001)               |                                                                                                                |                                                                                                                         |                                                                                     |                                                                                                                                                                 | Significant improvements with PGB compared to PLA (P=0.002)                                                                                                                                  |                                                                                         |
| 40<br>41<br>42                                           | Kanodia 2011          |                                                                                                                                | Significantly improved with PGB compared to PLA: MD -21, 95% CI: -23.8 to -18.2; P = 0.004)                    |                                                                                                                         |                                                                                     |                                                                                                                                                                 |                                                                                                                                                                                              |                                                                                         |
| 43<br>44<br>45<br>46                                     | Kim 2011              |                                                                                                                                |                                                                                                                |                                                                                                                         | Significantly favoured PGB over PLA (P<0.05)                                        | Significant improvement with PGB over PLA in sleep quantity (P=0.03), sleep adequacy (P=0.13), snoring (P=0.39), and reduced the sleep problems index (P=0.049) | No significant difference between groups at endpoint, MD 0 (95% CI -0.1, 0.1) P= 0.566                                                                                                       | Significant improvement of in PGB group vs PLA: MD -0.3 (95% CI -0.6, 0) (P=0.049)      |
| 47<br>48<br>49                                           | Krceviski Skvarč 2010 | No significant difference between groups, P values not reported                                                                |                                                                                                                |                                                                                                                         |                                                                                     |                                                                                                                                                                 |                                                                                                                                                                                              |                                                                                         |
| 50<br>51<br>52<br>53                                     | Hesser 2004           |                                                                                                                                |                                                                                                                |                                                                                                                         | Significantly favoured PGB over PLA (P=0.0001)                                      |                                                                                                                                                                 |                                                                                                                                                                                              |                                                                                         |
| 54<br>55<br>56                                           | Liu 2015              |                                                                                                                                | Significant decrease with PGB compared with PLA: MD -8.18, 95% CI: -11.99 to -4.37; P<0.0001)                  | Significant decrease in with PGB compared with PLA: MD -0.37, 95% CI: -0.58 to -0.16; P=0.0007).                        |                                                                                     | Significantly greater improvements with PGB in subscales of sleep disturbance (P=0.0039) and quantity of sleep (P=0.0035) compared with PLA                     | Significantly improved with PGB versus PLA: LSMD -0.49 95% CI -0.72 to -0.27, P<0.0001                                                                                                       | Significant improvement with PGB versus PLA, LSMD -0.62 95% (CI -0.86, -0.39), P<0.0001 |
| 57<br>58<br>59<br>60                                     | Mathieson 2017        |                                                                                                                                |                                                                                                                |                                                                                                                         |                                                                                     |                                                                                                                                                                 |                                                                                                                                                                                              |                                                                                         |
| 61<br>62<br>63<br>64                                     | Moore 2010            |                                                                                                                                |                                                                                                                |                                                                                                                         | Significantly favoured PGB over PLA: LSMD -0.51 (95% CI, -0.96 to -0.07; P = 0.024) | Significantly greater improvements with PGB in subscales of sleep disturbance (P=0.0034) and quantity of sleep (P=0.018) compared with PLA                      | No significant differences in endpoint scores of EQ-5D utility score least squares means 0.03, 95% CI -0.04, 0.09 P= 0.429, or EQ-5D VAS at endpoint LSMD 3.50 (95% CI -1.18, 8.18) P= 0.142 | No statistically significant difference between groups                                  |
| 65<br>66<br>67                                           | Rauck 2013            |                                                                                                                                |                                                                                                                |                                                                                                                         | No significant difference between groups: MD 0.11 (95% CI -0.60 to 0.82)            |                                                                                                                                                                 |                                                                                                                                                                                              | No statistically significant difference between groups                                  |
| 68<br>69<br>70                                           | Richter 2005          |                                                                                                                                | Significantly favoured PGB 600mg/day over PLA (MD -14.67, 95% CI, -21.92 to -7.41; P = 0.0002). No significant | Significantly favoured PGB 600mg/day over PLA (MD -0.66, 95% CI, -0.97 to -0.35; P = 0.0002). No significant difference | Significantly favoured PGB over PLA: LSMD -1.152; 95% CI -1.752 to -0.551; P=0.0004 |                                                                                                                                                                 |                                                                                                                                                                                              |                                                                                         |

1  
2  
3  
4  
5  
6  
7  
8  
9  
10  
11  
12  
13  
14  
15  
16  
17  
18  
19  
20  
21  
22  
23  
24  
25  
26  
27  
28  
29  
30  
31  
32  
33  
34  
35  
36  
37  
38  
39  
40  
41  
42  
43  
44  
45  
46  
47  
48  
49  
50  
51  
52  
53  
54  
55  
56  
57  
58  
59  
60

|                   |                                                                                                                                                          |                                                                                                                                                           |                                                                                                                                         |                                                                                   |                                                                                                                                                             |                                                                                                                                                                    |                                                                                                                                                                                        |                                                               |
|-------------------|----------------------------------------------------------------------------------------------------------------------------------------------------------|-----------------------------------------------------------------------------------------------------------------------------------------------------------|-----------------------------------------------------------------------------------------------------------------------------------------|-----------------------------------------------------------------------------------|-------------------------------------------------------------------------------------------------------------------------------------------------------------|--------------------------------------------------------------------------------------------------------------------------------------------------------------------|----------------------------------------------------------------------------------------------------------------------------------------------------------------------------------------|---------------------------------------------------------------|
|                   |                                                                                                                                                          |                                                                                                                                                           | difference between PGB 150mg/day and PLA (MD -4.78, 95% CI, -12.20 to -2.64; P = 0.20)                                                  | between PGB 150 mg/day and PLA (MD -0.17, 95% CI, -0.49 to 0.14; P = 0.28)        |                                                                                                                                                             |                                                                                                                                                                    |                                                                                                                                                                                        |                                                               |
| Rosenstock 2004   |                                                                                                                                                          |                                                                                                                                                           | Significantly favoured PGB over PLA (MD -16.19, 95% CI, -24.52 to -7.86; P = 0.0002)                                                    | Significantly favoured PGB over PLA (MD -0.37, 95% CI, -0.72 to -0.02; P = 0.036) | Significantly favoured PGB over PLA: LSMD -1.54, 95% CI -2.28 to -0.80, P=0.0001                                                                            |                                                                                                                                                                    |                                                                                                                                                                                        |                                                               |
| Sabatowski 2004   |                                                                                                                                                          |                                                                                                                                                           |                                                                                                                                         |                                                                                   | Significantly favoured PGB over PLA: LSMD -1.11, 95% CI -1.71 to -0.51, P=0.0003 for 150 mg/day; LSMD -1.43, 95% CI -2.04 to -0.82, P=0.0001 for 300 mg/day |                                                                                                                                                                    |                                                                                                                                                                                        |                                                               |
| Atah 2011         |                                                                                                                                                          |                                                                                                                                                           | Significantly favoured PGB 300 mg/day and 600 mg/day over PLA (P < 0.05)                                                                |                                                                                   | Significantly improved in the 300 and 600 mg/day PGB groups compared with PLA (P < 0.0001 and P = 0.0273 respectively)                                      |                                                                                                                                                                    |                                                                                                                                                                                        |                                                               |
| Shabbir 2011      | Significant improvement in pain of DPN was observed in patients receiving PGB (48.1%) and compared to those receiving PLA (10.5%), P values not reported |                                                                                                                                                           |                                                                                                                                         |                                                                                   |                                                                                                                                                             |                                                                                                                                                                    |                                                                                                                                                                                        |                                                               |
| Siddall 2006      |                                                                                                                                                          |                                                                                                                                                           | Significantly favoured PGB over PLA (MD -17.6, 95% CI, -25.2 to -10.0; P<0.001)                                                         | Significantly favoured PGB over PLA (MD -0.66, 95% CI, -0.99 to -0.32; P<0.001)   |                                                                                                                                                             |                                                                                                                                                                    |                                                                                                                                                                                        |                                                               |
| Simpson 2010      |                                                                                                                                                          |                                                                                                                                                           |                                                                                                                                         |                                                                                   |                                                                                                                                                             |                                                                                                                                                                    | Significant self-reported improvement favouring PGB over PLA: 82.8% vs 66.7% (P= 0.008)                                                                                                |                                                               |
| Simpson 2014      |                                                                                                                                                          |                                                                                                                                                           |                                                                                                                                         |                                                                                   | No significant difference between groups: LSMD 0.04, 95% CI 0.43 to 0.35, P =0.840                                                                          |                                                                                                                                                                    | No significant differences between groups: (P=0.505)                                                                                                                                   | No significant differences between groups (P=0.427)           |
| Stacey 2008       |                                                                                                                                                          | Significant improvement in VAS allodynia scores with PGB compared to PLA (flexible-dose: MD -14.4 mm [P<0 .0001] and fixed-dose, MD -8.98 mm [P =0.0075]) | Significant improvement in with PGB compared to PLA (flexible-dose: MD -16.33 mm [P<0 .0001] and fixed-dose, MD -11.97 mm [P =0 .0008]) |                                                                                   | Significant improvements with flexible- and fixed-dose PGB. Results of between-group differences not reported                                               | Fixed or flexible dose PGB demonstrated significant improvement in VAS anxiety scores over PLA (fixed-dose, 19.95, P = 0.025, and flexible-dose, -17.81; P= 0.024) | Patients treated with any PGB treatment regimen were significantly more likely to rate themselves as minimally, much, or very much improved on the PGIC at end point compared with PLA |                                                               |
| Solle 2008        |                                                                                                                                                          |                                                                                                                                                           |                                                                                                                                         |                                                                                   |                                                                                                                                                             | Significant improvements in utility scores for 150, 300, 600mg/day respectively compared to PLA, all P ≤ 0.0263                                                    | Significant improvement with 600 mg/day PGB versus PLA in subjects reporting "improved" or "much improved" (50.5% vs 33.3%, P = 0.02)                                                  | Significant superiority of PGB 600 mg/day over PLA (P= 0.009) |
| San Seventer 2006 |                                                                                                                                                          |                                                                                                                                                           |                                                                                                                                         |                                                                                   | Significant improvement in MOS sleep scale problems with PGB compared with PLA MD - 7.54, 95% CI -11.52 to -3.56, P<0.001                                   |                                                                                                                                                                    | Patients in the 150 mg/day (P = 0.02) and 600 mg/day (P = 0.003) groups were more likely to report global improvement than those in the PLA group                                      |                                                               |
| van Seventer 2010 |                                                                                                                                                          |                                                                                                                                                           |                                                                                                                                         |                                                                                   |                                                                                                                                                             |                                                                                                                                                                    | Significant improvement in favour of PGB over PLA (P = 0.006)                                                                                                                          |                                                               |
| Vranken 2008      |                                                                                                                                                          | Significant decrease in with PGB compared with PLA: MD 2.18, 95% CI: 0.57 to 3.80; P = 0.01)                                                              |                                                                                                                                         |                                                                                   |                                                                                                                                                             |                                                                                                                                                                    | Statistically significant improvement for both the EQ-5D utility score (p<0.001) and EQ-5D VAS score with PGB compared to PLA (P<0.001)                                                |                                                               |

ABBREVIATIONS: CGIC: Clinician global impression of change; LSMD: Least square mean difference; MD: Mean difference; MOS-Sleep: Medical Outcomes Study Sleep Scale; NRS: numerical rating scale; PGB: Pregabalin; PGIC: Patient global impression of change; PLA: Placebo; SF-MPQ PPI: Short-Form McGill Pain Questionnaire personal pain intensity; SF-MPQ VAS: Short-Form McGill Pain Questionnaire visual assessment scale; VAS: Visual assessment scale

These outcome results have been presented narratively because there was inadequate data to pool results across studies



**Figure S1: Funnel plot for publication bias in RCTs assessing the effect of pregabalin in neuropathic pain.** The broken line represents the mean difference for all trials.

1  
2  
3  
4  
5  
6  
7  
8  
9  
10  
11  
12  
13  
14  
15  
16  
17  
18  
19  
20  
21  
22  
23  
24  
25  
26  
27  
28  
29  
30  
31  
32  
33  
34  
35  
36  
37  
38  
39  
40  
41  
42  
43  
44  
45  
46  
47



**Figure S2: Effect of pregabalin on the risk of weight gain in patients with neuropathic pain**

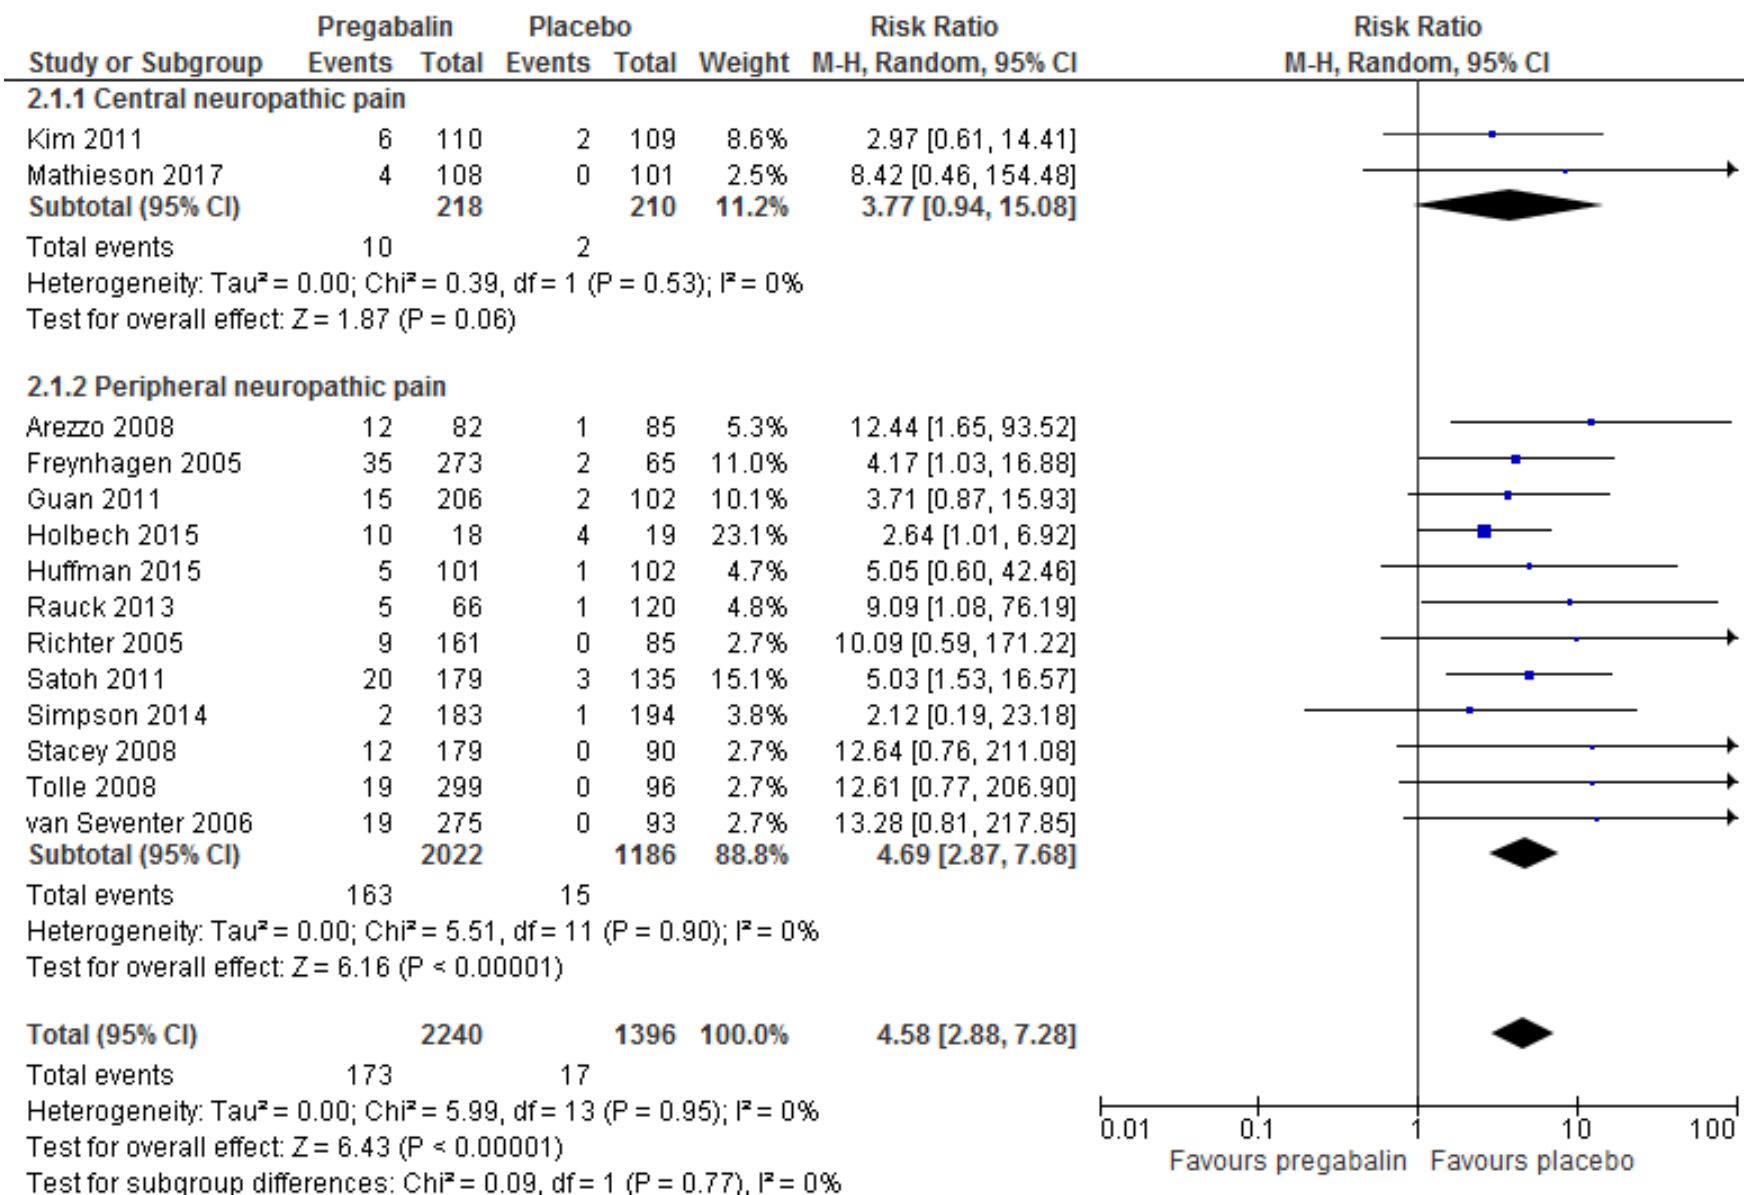

**Figure S3: Effect of pregabalin on the risk of somnolence in patients with neuropathic pain**

**Figure S4: Effect of pregabalin on the risk of dizziness in patients with neuropathic pain**

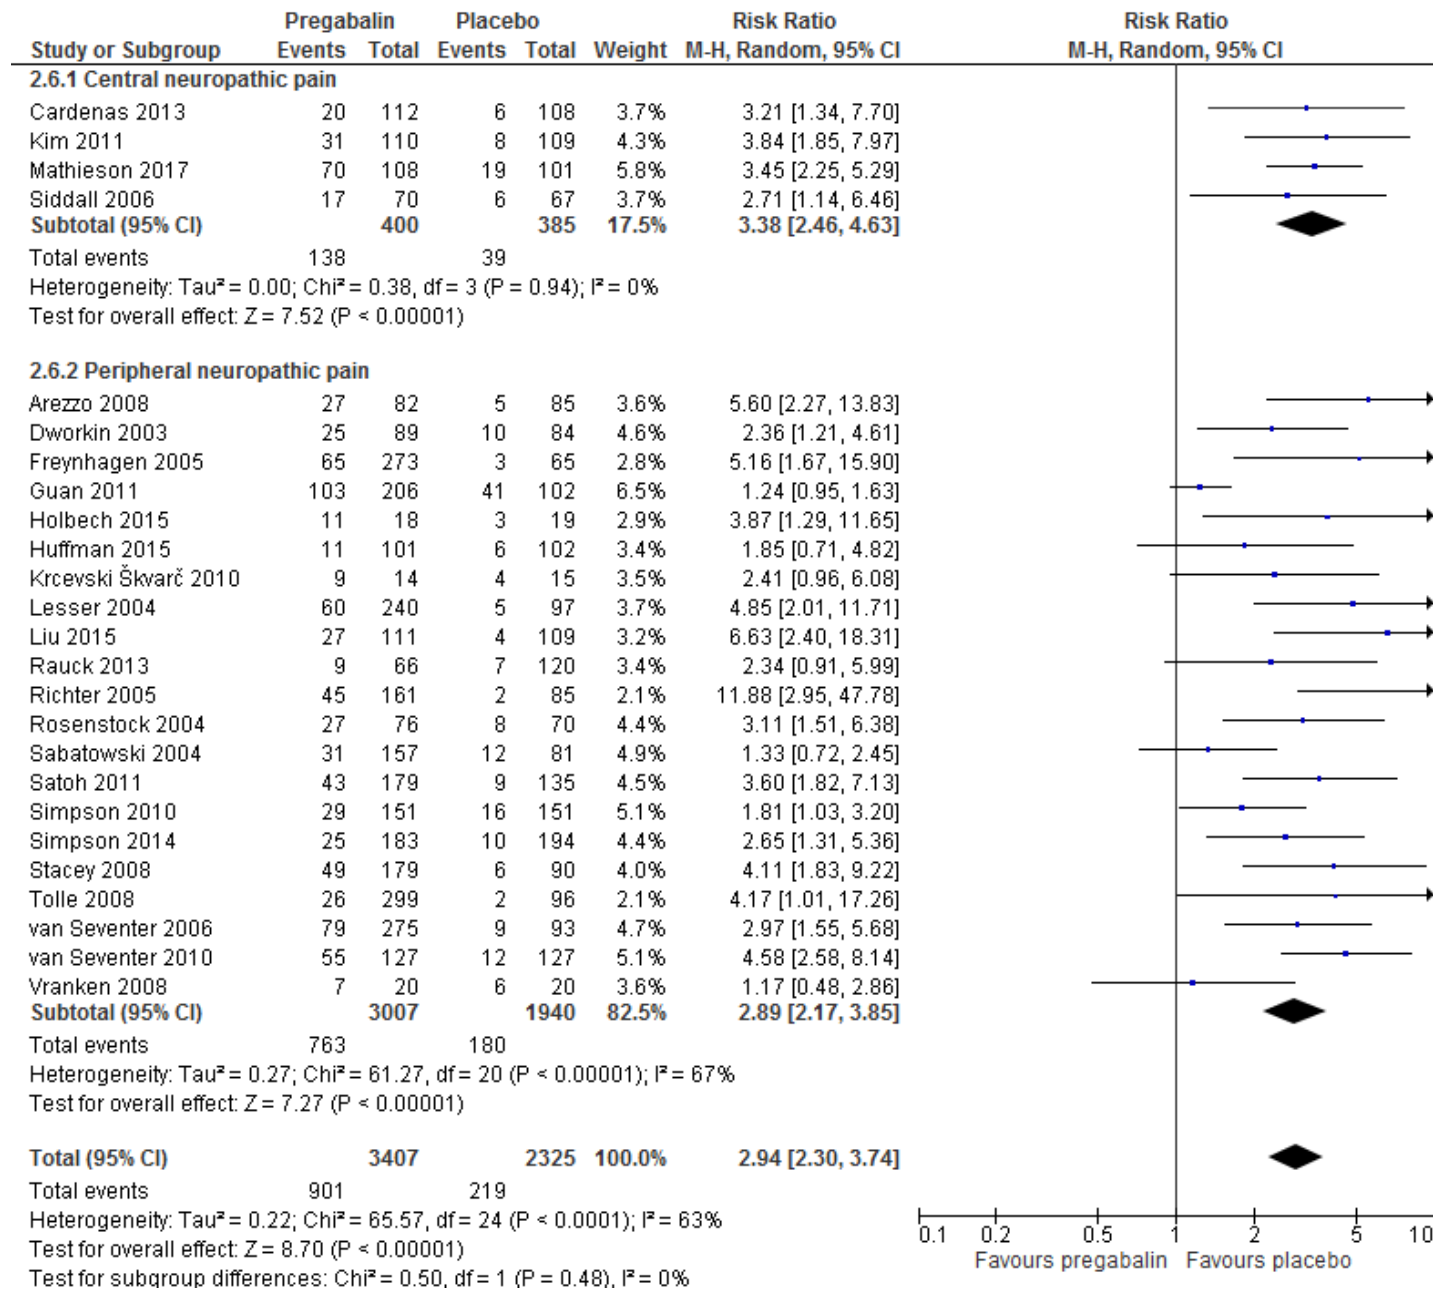

Figure S5: Effect of pregabalin on the risk of peripheral edema in patients with neuropathic pain

1  
2  
3  
4  
5  
6  
7  
8  
9  
10  
11  
12  
13  
14  
15  
16  
17  
18  
19  
20  
21  
22  
23  
24  
25  
26  
27  
28  
29  
30  
31  
32  
33  
34  
35  
36  
37  
38  
39  
40  
41  
42  
43  
44  
45  
46  
47



**Figure S6: Effect of pregabalin on the risk of fatigue including asthenia in patients with neuropathic pain**



**Figure S7: Effect of pregabalin on the risk of visual disturbances\* in patients with neuropathic pain**

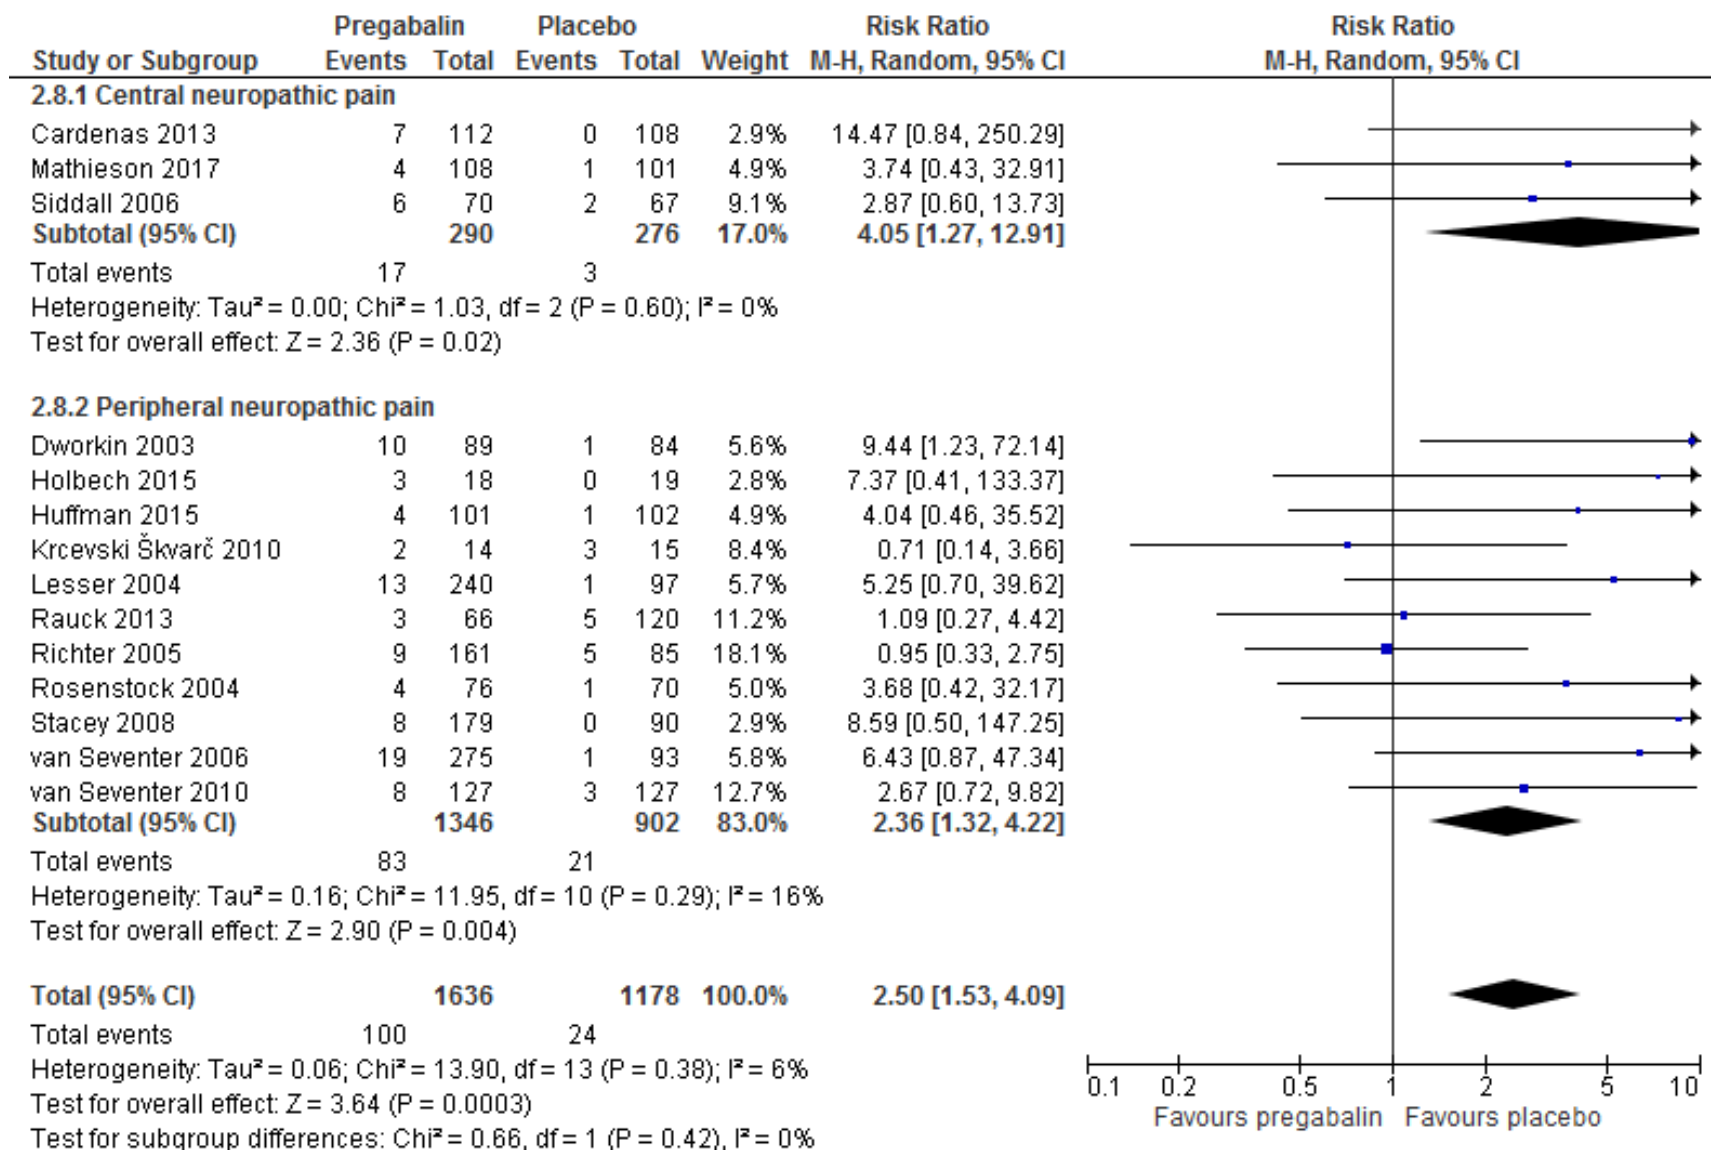

\*includes blurring of vision and amblyopia

**Figure S8: Effect of pregabalin on the risk of ataxia in patients with neuropathic pain**





**Figure S9: Effect of pregabalin on the risk of non-peripheral edema in patients with neuropathic pain**

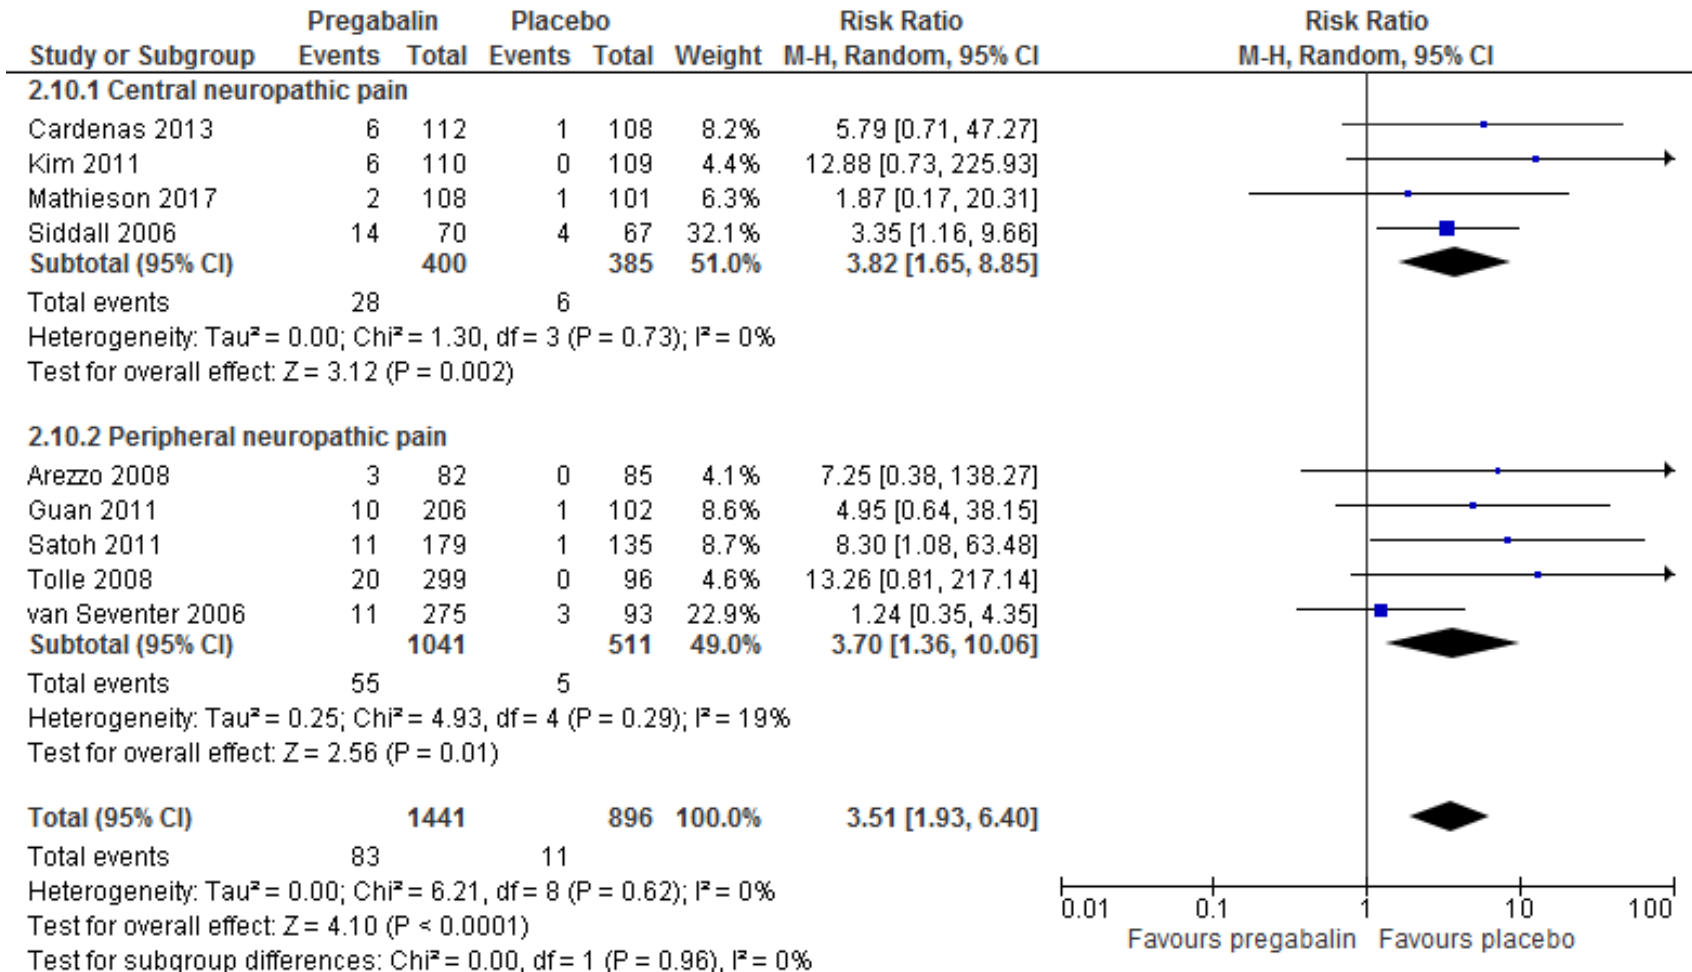

**Figure S10: Effect of pregabalin on the risk of vertigo in patients with neuropathic pain**



**Figure S11: Effect of pregabalin on the risk of euphoria in patients with neuropathic pain**

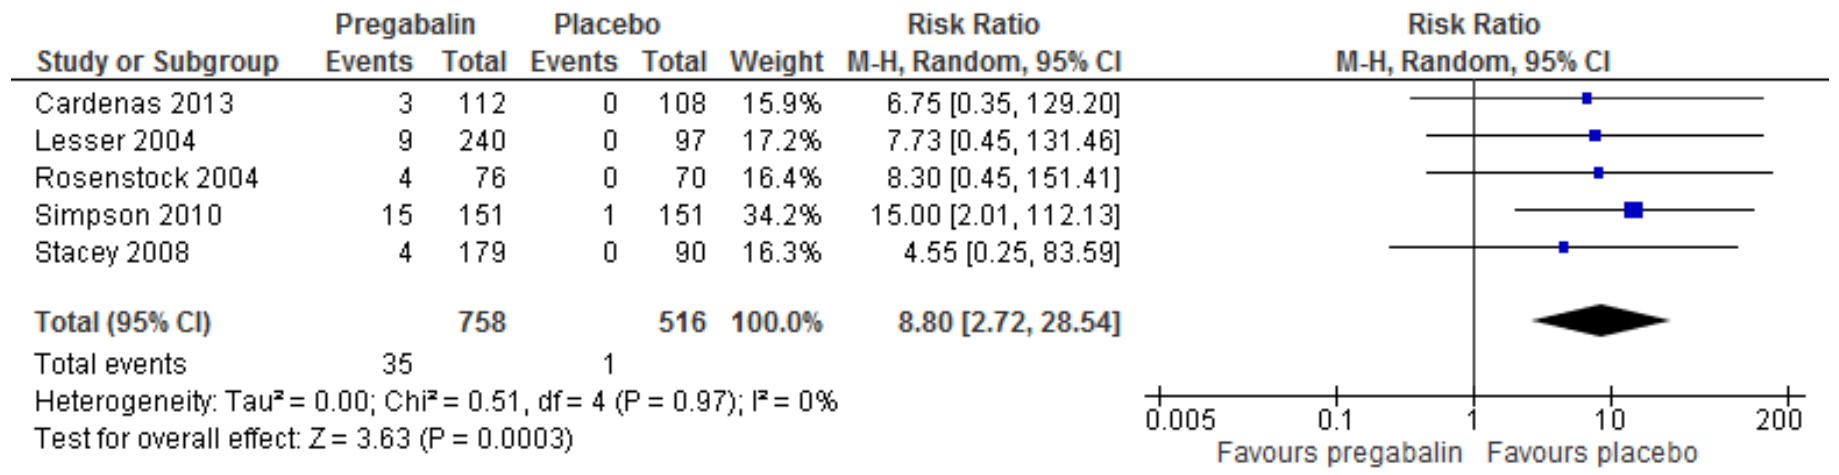

**Figure S12: Effect of pregabalin on the risk of dry mouth in patients with neuropathic pain**



Figure S13: Effect of pregabalin on the risk of discontinuation due to adverse events



**Figure S14: Effect of pregabalin on the risk of serious adverse events in patients with neuropathic pain**

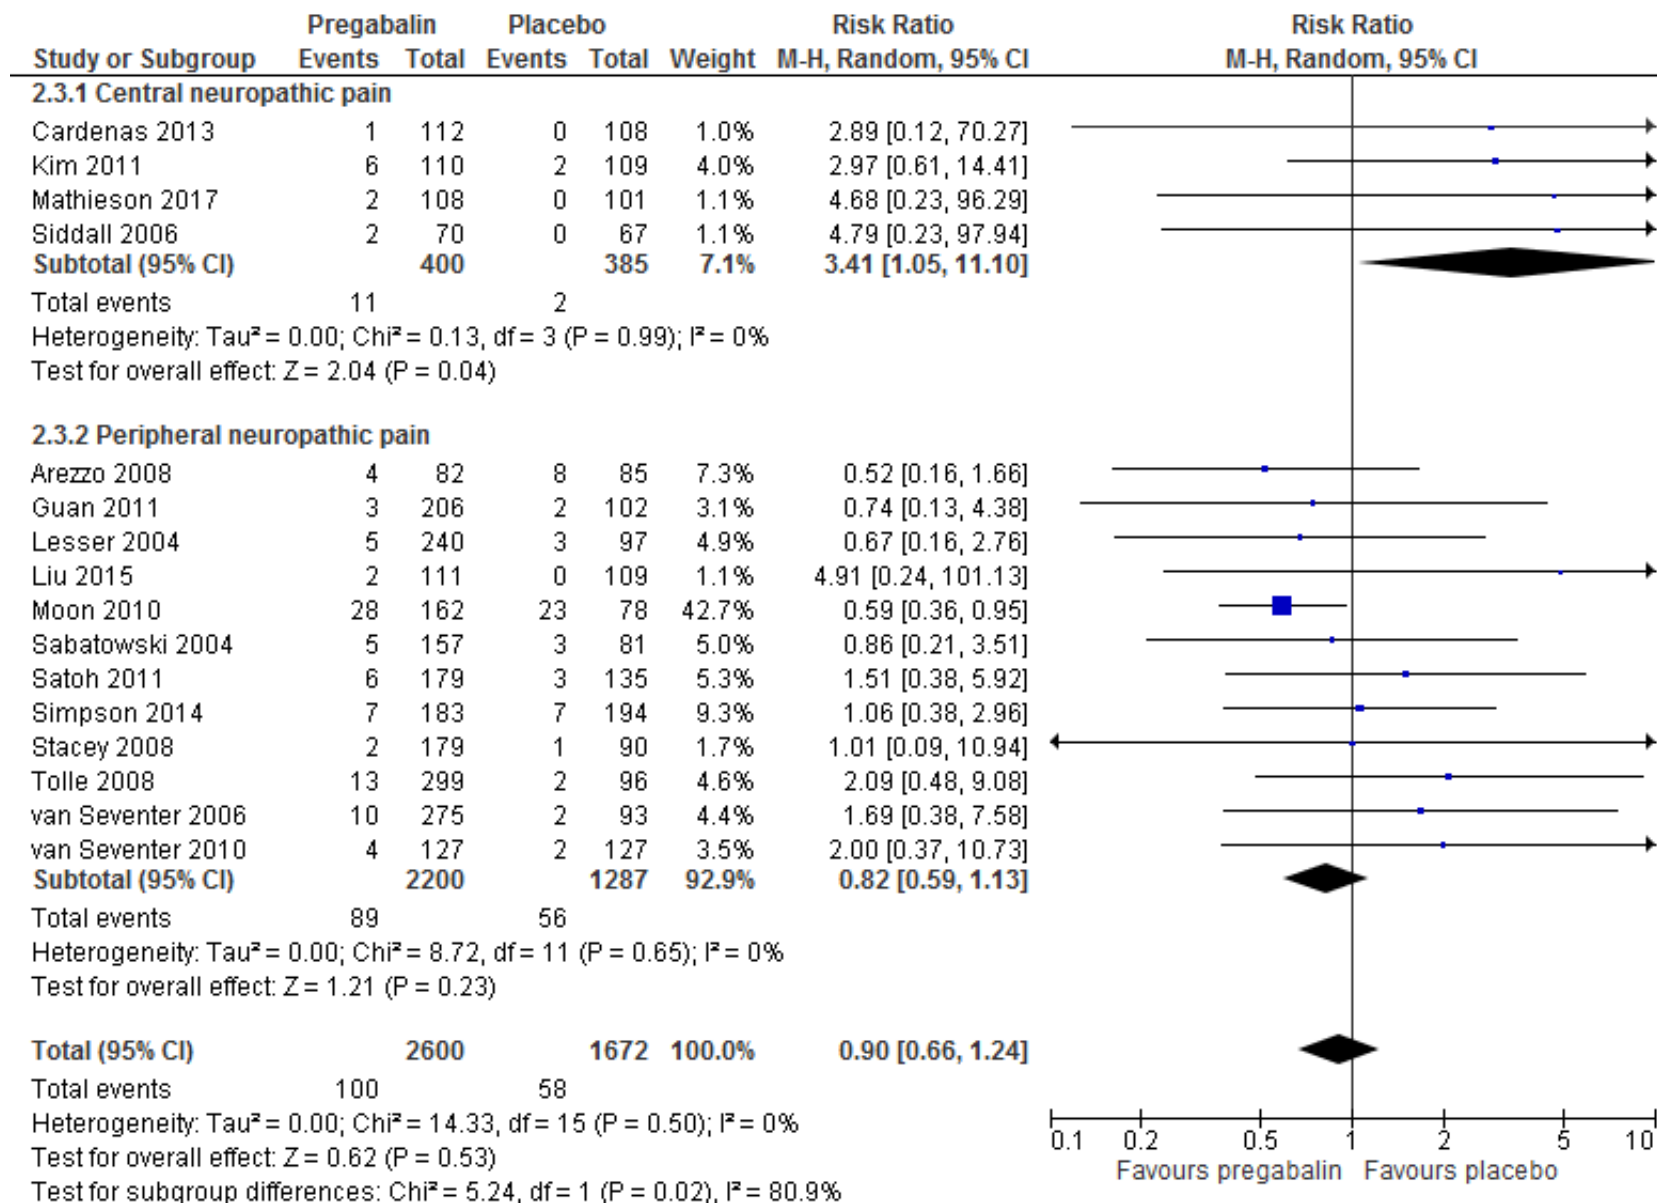

# Figure S15: Effect of pregabalin on the sleep disturbance in patients with neuropathic pain

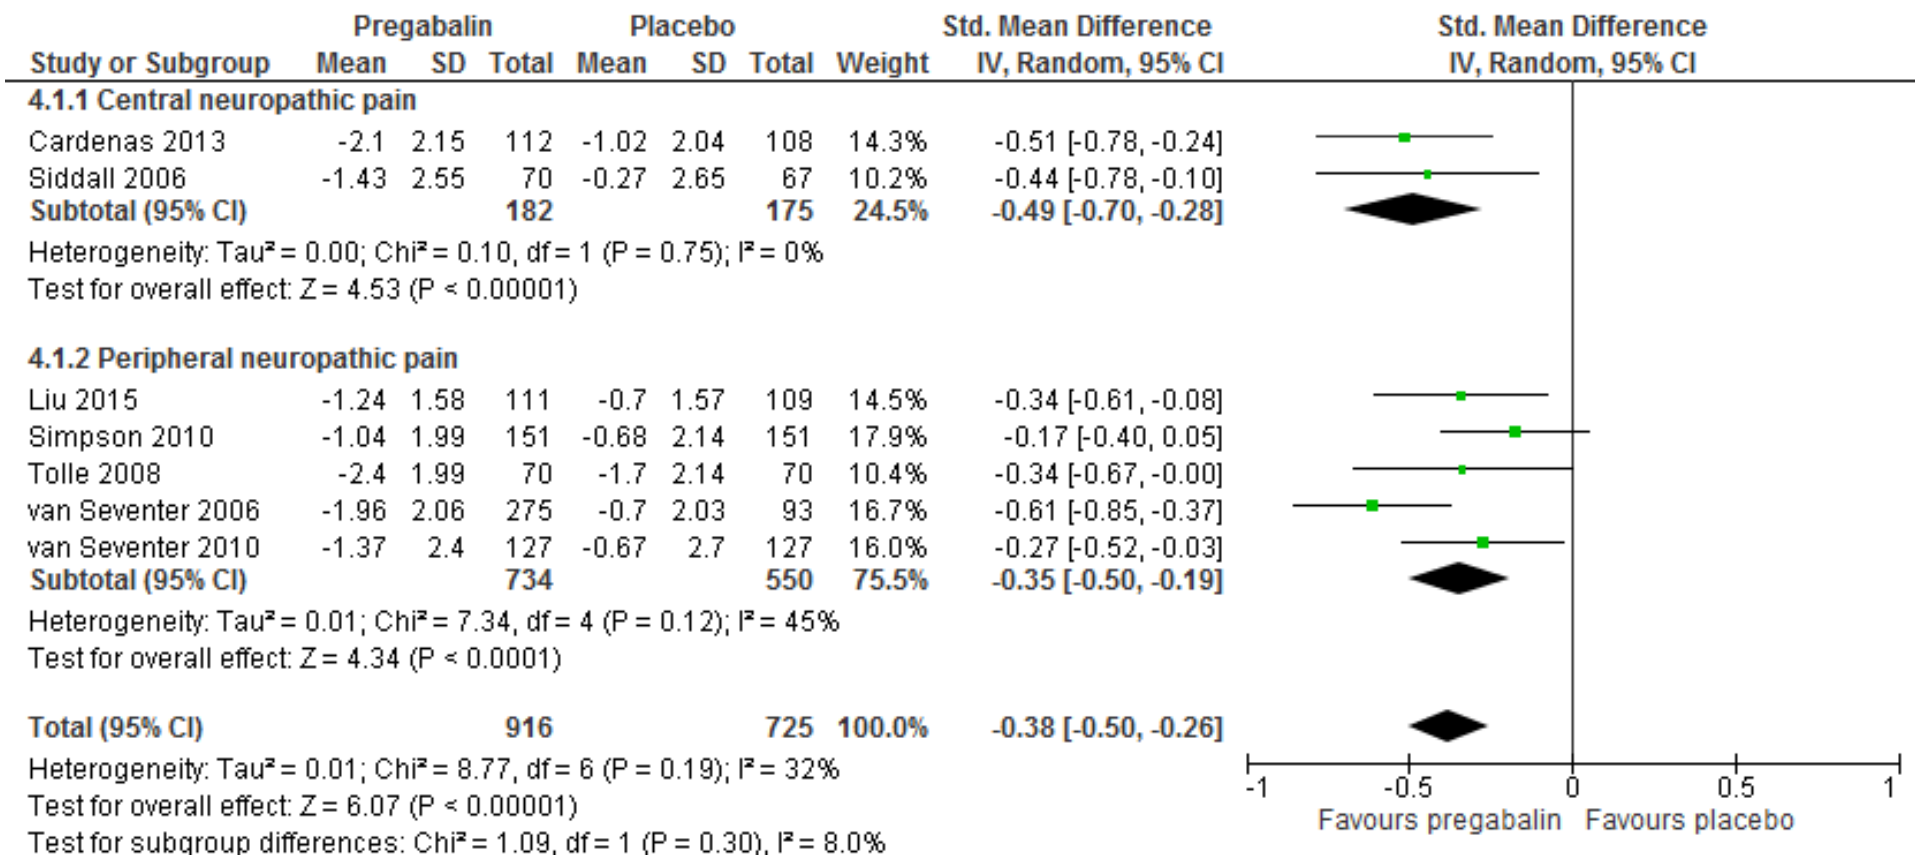

**Figure S16: Effect of pregabalin on HADS-anxiety scores in patients with neuropathic pain**





# Figure S17: Effect of pregabalin on HADS-depression scores in patients with neuropathic pain

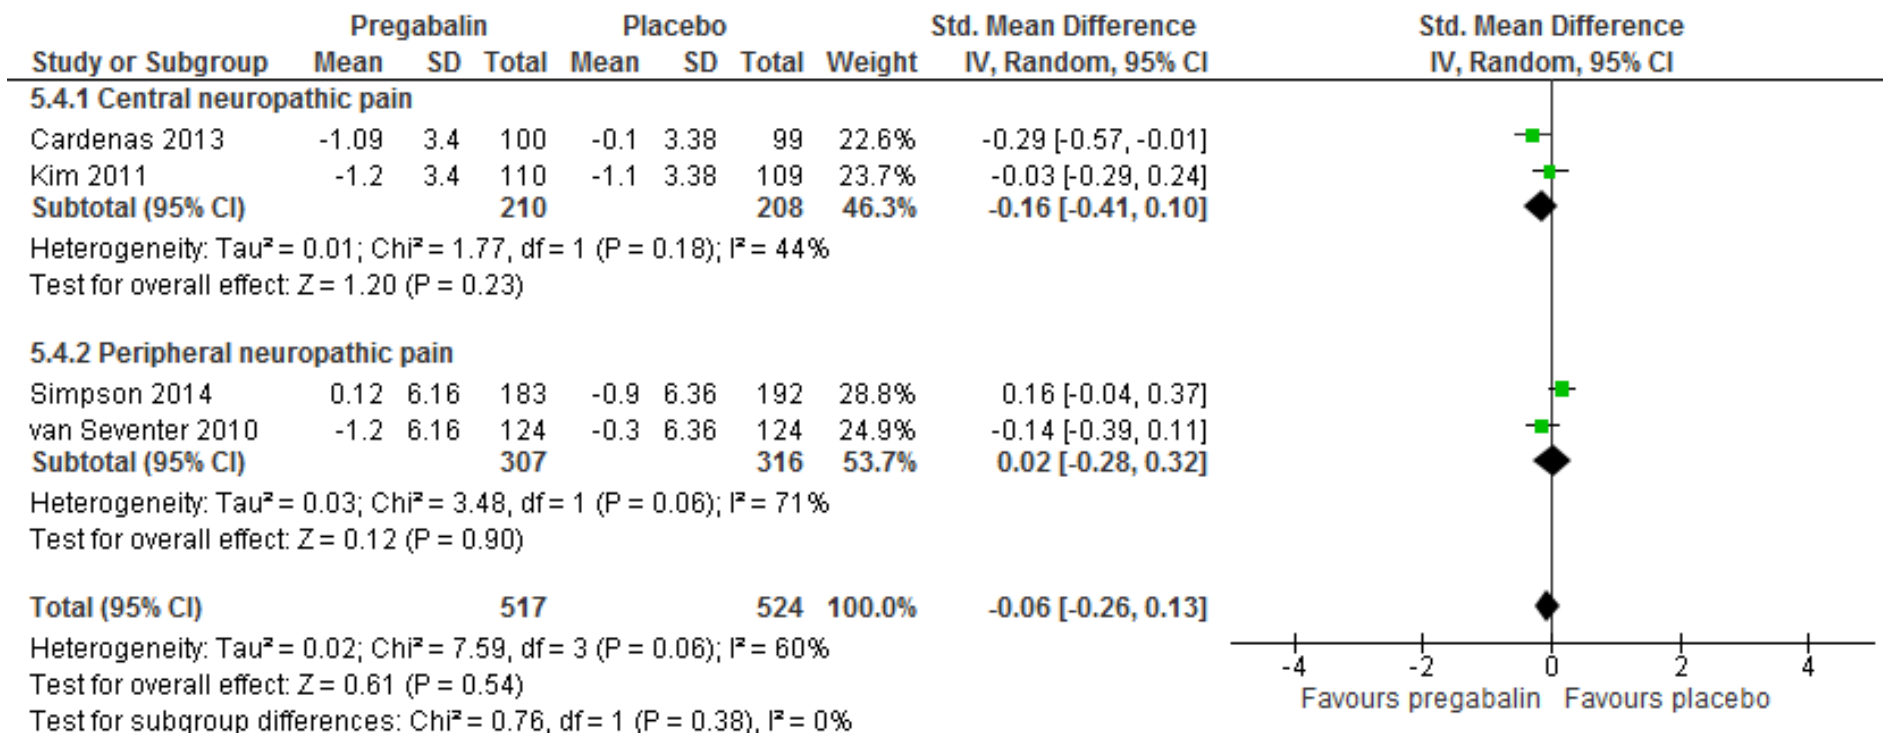



# PRISMA 2009 Checklist

| Section/topic                      | #  | Checklist item                                                                                                                                                                                                                                                                                              | Reported on page # |
|------------------------------------|----|-------------------------------------------------------------------------------------------------------------------------------------------------------------------------------------------------------------------------------------------------------------------------------------------------------------|--------------------|
| <b>TITLE</b>                       |    |                                                                                                                                                                                                                                                                                                             |                    |
| Title                              | 1  | Identify the report as a systematic review, meta-analysis, or both.                                                                                                                                                                                                                                         | 1                  |
| <b>ABSTRACT</b>                    |    |                                                                                                                                                                                                                                                                                                             |                    |
| Structured summary                 | 2  | Provide a structured summary including, as applicable: background; objectives; data sources; study eligibility criteria, participants, and interventions; study appraisal and synthesis methods; results; limitations; conclusions and implications of key findings; systematic review registration number. | 2-3                |
| <b>INTRODUCTION</b>                |    |                                                                                                                                                                                                                                                                                                             |                    |
| Rationale                          | 3  | Describe the rationale for the review in the context of what is already known.                                                                                                                                                                                                                              | 4-5                |
| Objectives                         | 4  | Provide an explicit statement of questions being addressed with reference to participants, interventions, comparisons, outcomes, and study design (PICOS).                                                                                                                                                  | 5                  |
| <b>METHODS</b>                     |    |                                                                                                                                                                                                                                                                                                             |                    |
| Protocol and registration          | 5  | Indicate if a review protocol exists, if and where it can be accessed (e.g., Web address), and, if available, provide registration information including registration number.                                                                                                                               | Suppl.             |
| Eligibility criteria               | 6  | Specify study characteristics (e.g., PICOS, length of follow-up) and report characteristics (e.g., years considered, language, publication status) used as criteria for eligibility, giving rationale.                                                                                                      | 5                  |
| Information sources                | 7  | Describe all information sources (e.g., databases with dates of coverage, contact with study authors to identify additional studies) in the search and date last searched.                                                                                                                                  | 5                  |
| Search                             | 8  | Present full electronic search strategy for at least one database, including any limits used, such that it could be repeated.                                                                                                                                                                               | Appendix 1         |
| Study selection                    | 9  | State the process for selecting studies (i.e., screening, eligibility, included in systematic review, and, if applicable, included in the meta-analysis).                                                                                                                                                   | 5                  |
| Data collection process            | 10 | Describe method of data extraction from reports (e.g., piloted forms, independently, in duplicate) and any processes for obtaining and confirming data from investigators.                                                                                                                                  | 6                  |
| Data items                         | 11 | List and define all variables for which data were sought (e.g., PICOS, funding sources) and any assumptions and simplifications made.                                                                                                                                                                       | 6                  |
| Risk of bias in individual studies | 12 | Describe methods used for assessing risk of bias of individual studies (including specification of whether this was done at the study or outcome level), and how this information is to be used in any data synthesis.                                                                                      | 6                  |
| Summary measures                   | 13 | State the principal summary measures (e.g., risk ratio, difference in means).                                                                                                                                                                                                                               | 6                  |
| Synthesis of results               | 14 | Describe the methods of handling data and combining results of studies, if done, including measures of consistency (e.g., $I^2$ ) for each meta-analysis.                                                                                                                                                   | 6                  |

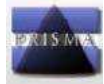

# PRISMA 2009 Checklist

| Section/topic                 | #  | Checklist item                                                                                                                                                                                           | Reported on page # |
|-------------------------------|----|----------------------------------------------------------------------------------------------------------------------------------------------------------------------------------------------------------|--------------------|
| Risk of bias across studies   | 15 | Specify any assessment of risk of bias that may affect the cumulative evidence (e.g., publication bias, selective reporting within studies).                                                             | 6                  |
| Additional analyses           | 16 | Describe methods of additional analyses (e.g., sensitivity or subgroup analyses, meta-regression), if done, indicating which were pre-specified.                                                         | 6                  |
| <b>RESULTS</b>                |    |                                                                                                                                                                                                          |                    |
| Study selection               | 17 | Give numbers of studies screened, assessed for eligibility, and included in the review, with reasons for exclusions at each stage, ideally with a flow diagram.                                          | 7                  |
| Study characteristics         | 18 | For each study, present characteristics for which data were extracted (e.g., study size, PICOS, follow-up period) and provide the citations.                                                             | 7                  |
| Risk of bias within studies   | 19 | Present data on risk of bias of each study and, if available, any outcome level assessment (see item 12).                                                                                                | 7                  |
| Results of individual studies | 20 | For all outcomes considered (benefits or harms), present, for each study: (a) simple summary data for each intervention group (b) effect estimates and confidence intervals, ideally with a forest plot. | 7-19               |
| Synthesis of results          | 21 | Present results of each meta-analysis done, including confidence intervals and measures of consistency.                                                                                                  | 7-19               |
| Risk of bias across studies   | 22 | Present results of any assessment of risk of bias across studies (see Item 15).                                                                                                                          | 7-19               |
| Additional analysis           | 23 | Give results of additional analyses, if done (e.g., sensitivity or subgroup analyses, meta-regression [see Item 16]).                                                                                    | 7-19               |
| <b>DISCUSSION</b>             |    |                                                                                                                                                                                                          |                    |
| Summary of evidence           | 24 | Summarize the main findings including the strength of evidence for each main outcome; consider their relevance to key groups (e.g., healthcare providers, users, and policy makers).                     | 20                 |
| Limitations                   | 25 | Discuss limitations at study and outcome level (e.g., risk of bias), and at review-level (e.g., incomplete retrieval of identified research, reporting bias).                                            | 22                 |
| Conclusions                   | 26 | Provide a general interpretation of the results in the context of other evidence, and implications for future research.                                                                                  | 24                 |
| <b>FUNDING</b>                |    |                                                                                                                                                                                                          |                    |
| Funding                       | 27 | Describe sources of funding for the systematic review and other support (e.g., supply of data); role of funders for the systematic review.                                                               | 24                 |

From: Moher D, Liberati A, Tetzlaff J, Altman DG, The PRISMA Group (2009). Preferred Reporting Items for Systematic Reviews and Meta-Analyses: The PRISMA Statement. PLoS Med 6(6): e1000097. doi:10.1371/journal.pmed1000097

For more information, visit: [www.prisma-statement.org](http://www.prisma-statement.org).
