# Supplementary material for: Benefits and harms of pregabalin in the management of neuropathic pain: a rapid review and meta-analysis of randomised clinical trials
Source: PubMed Central journal article supplement — BMJ Open. 2019 Jan 21;9(1):e023600. doi: 10.1136/bmjopen-2018-023600 (PMC6347863; doi:10.1136/bmjopen-2018-023600), 2019-01-21
Supplement: bmjopen-2018-023600supp001.pdf [file bmjopen-2018-023600supp001.pdf]

## **Appendix 1: Search strategy for identifying RCTs assessing the effects of pregabalin for management of neuropathic pain**

### **MEDLINE**

1. pain.mp. or Pain/
2. pain\*.mp.
3. analgesia/
4. analges\*.mp.
5. neuralgia/
6. 1 or 2 or 3 or 4 or 5
7. pregabalin/
8. clinical trials.mp. or Clinical Trial/
9. randomized clinical trial.mp.
10. controlled clinical trial.mp. or Controlled Clinical Trial/
11. double-blind trial.mp.
12. placebo.ab.
13. ((doubl\$ or tripl\$ or trebl\$) adj5 (blind\$ or mask\$)).ti,ab.
14. 8 or 9 or 10 or 11 or 12 or 13
15. 6 and 7 and 14
16. (animals not (animals and humans)).sh.
17. 15 not 16

### **EMBASE**

1. pain/ or neuropathic pain/
2. analgesi\*.mp.
3. 1 or 2
4. pregabalin.mp. or pregabalin/
5. controlled clinical trial/ or randomized clinical trial.mp.
6. double blind procedure/

7. placebo\*.ab.
8. random\*.ab.
9. ((doubl\* or trebl\* or tripl\*) adj25 (blind\* or mask\*)).ab.
10. 5 or 6 or 7 or 8 or 9
11. 3 and 4 and 10

## **COCHRANE**

- #1 pain
- #2 analgesia
- #3 neuropathic pain
- #4 neuralgia
- #5 #1 or #2 or #3 or #4
- #6 pregabalin
- #7 lyrica
- #8 #6 or #7
- #9 randomized controlled trial.pt
- #10 controlled controlled trial.pt
- #11 randomized.ti,ab
- #12 groups.ti,ab
- #13 placebo.ti,ab
- #14 #9 or #10 or #11 or #12 or #13
- #15 #5 and #8 and #14
