# Supplementary material for: Benefits and harms of pregabalin in the management of neuropathic pain: a rapid review and meta-analysis of randomised clinical trials
Source: PubMed Central journal article supplement — BMJ Open. 2019 Jan 21;9(1):e023600. doi: 10.1136/bmjopen-2018-023600 (PMC6347863; doi:10.1136/bmjopen-2018-023600), 2019-01-21
Supplement: bmjopen-2018-023600supp004.pdf [file bmjopen-2018-023600supp004.pdf]

## Appendix 4: Risk of bias judgements for included studies

### Arezzo 2008

#### Risk of bias table

| <b>Bias</b>                                               | <b>Authors' judgement</b> | <b>Support for judgement</b>                                                                                                                                                                                                                     |
|-----------------------------------------------------------|---------------------------|--------------------------------------------------------------------------------------------------------------------------------------------------------------------------------------------------------------------------------------------------|
| Random sequence generation (selection bias)               | Low risk                  | Computer-generated random code                                                                                                                                                                                                                   |
| Allocation concealment (selection bias)                   | Low risk                  | Number-coded study medications to the study sites were assigned using an interactive voice-response system                                                                                                                                       |
| Blinding of participants and personnel (performance bias) | Low risk                  | Blinding was maintained by dispensing pregabalin and placebo in identical capsules                                                                                                                                                               |
| Blinding of outcome assessment (detection bias)           | Low risk                  | The sponsor, members of the study site, and the patients were unaware of the treatment assignment                                                                                                                                                |
| Incomplete outcome data (attrition bias)                  | Unclear risk              | Reasons for attrition reported; however, drop-out rates were 34.1% for pregabalin and 28.1% for placebo                                                                                                                                          |
| Selective reporting (reporting bias)                      | Unclear risk              | Outcomes reported as specified in methods. BOCF results also reported for pain scores. However, MD and SD for baseline and end-points were not reported separately, and some outcomes were reported at other time points other than at 13 weeks. |
| Other bias                                                | High risk                 | All investigators had financial ties to the sponsor                                                                                                                                                                                              |

## Cardenas 2013

### Risk of bias table

| <b>Bias</b>                                               | <b>Authors' judgement</b> | <b>Support for judgement</b>                                                                                                                                                                              |
|-----------------------------------------------------------|---------------------------|-----------------------------------------------------------------------------------------------------------------------------------------------------------------------------------------------------------|
| Random sequence generation (selection bias)               | Low risk                  | Computer-generated sequence                                                                                                                                                                               |
| Allocation concealment (selection bias)                   | Low risk                  | Interactive response technology system (via phone or internet) provided a unique identification number for each patient                                                                                   |
| Blinding of participants and personnel (performance bias) | Low risk                  | Both placebo and pregabalin were in the form of gray capsules                                                                                                                                             |
| Blinding of outcome assessment (detection bias)           | Low risk                  | Treatment allocation was concealed from patient and investigator                                                                                                                                          |
| Incomplete outcome data (attrition bias)                  | Unclear risk              | Acceptable dropout 15.7% placebo, 17% PGB. Reasons for dropout explained. ITT analysis (and modified ITT analysis) performed                                                                              |
| Selective reporting (reporting bias)                      | High risk                 | Following pre-specified outcomes from protocol not reported in study: Modified Brief Pain Inventory Interference Scale; Quantitative Assessment of Neuropathic Pain (QANeP) 6 outcomes; NPSI (9 outcomes) |
| Other bias                                                | High risk                 | All the investigators had financial ties to the study sponsor                                                                                                                                             |

## Dworkin 2003

### Risk of bias table

| <b>Bias</b>                                               | <b>Authors' judgement</b> | <b>Support for judgement</b>                                                                                                                                                                                                                                      |
|-----------------------------------------------------------|---------------------------|-------------------------------------------------------------------------------------------------------------------------------------------------------------------------------------------------------------------------------------------------------------------|
| Random sequence generation (selection bias)               | Unclear risk              | Sequential randomization schedule generated with block size of four. Unclear how this schedule was generated                                                                                                                                                      |
| Allocation concealment (selection bias)                   | Low risk                  | Study medication was packaged and labeled with sequential randomization numbers                                                                                                                                                                                   |
| Blinding of participants and personnel (performance bias) | Unclear risk              | Placebo capsules were identical in appearance to pregabalin; however also states that blinding could have been broken in emergency situations                                                                                                                     |
| Blinding of outcome assessment (detection bias)           | Low risk                  | Blind maintained until after the study was completed and all decisions regarding data evaluability had been made                                                                                                                                                  |
| Incomplete outcome data (attrition bias)                  | Unclear risk              | Uneven numbers of drop outs- PGB 35%, placebo 12%. Reasons provided- mostly due to adverse events                                                                                                                                                                 |
| Selective reporting (reporting bias)                      | Unclear risk              | 29 patients had possibly important variations from the protocol and details of this are specified. Secondary outcome of CGIC- mentioned in results that clinicians assessments of global change closely paralleled patients' assessments however no figures given |
| Other bias                                                | High risk                 | All the investigators had financial ties to the study sponsor                                                                                                                                                                                                     |

## **Freyenhagen 2005**

### **Risk of bias table**

| <b>Bias</b>                                               | <b>Authors' judgement</b> | <b>Support for judgement</b>                                                                                                                                  |
|-----------------------------------------------------------|---------------------------|---------------------------------------------------------------------------------------------------------------------------------------------------------------|
| Random sequence generation (selection bias)               | Unclear risk              | Insufficient information                                                                                                                                      |
| Allocation concealment (selection bias)                   | Unclear risk              | Insufficient information                                                                                                                                      |
| Blinding of participants and personnel (performance bias) | Unclear risk              | All patients received active medication or matching placebo capsules. Double blinded. However, unclear whether they were identical in appearance and taste    |
| Blinding of outcome assessment (detection bias)           | Unclear risk              | Insufficient information                                                                                                                                      |
| Incomplete outcome data (attrition bias)                  | High risk                 | High rates of dropout: PGB flexible dose 35%, PGB fixed dose 38%, 46%. Reasons provided (mostly due to adverse events for PGB, lack of efficacy for Placebo). |
| Selective reporting (reporting bias)                      | Low risk                  | Outcomes specified in methods match those found in results.                                                                                                   |
| Other bias                                                | High risk                 | All study investigators had financial ties to the study sponsor                                                                                               |

## Guan 2011

### Risk of bias table

| <b>Bias</b>                                               | <b>Authors' judgement</b> | <b>Support for judgement</b>                                                                                                                                                                                                                  |
|-----------------------------------------------------------|---------------------------|-----------------------------------------------------------------------------------------------------------------------------------------------------------------------------------------------------------------------------------------------|
| Random sequence generation (selection bias)               | Unclear risk              | Insufficient information                                                                                                                                                                                                                      |
| Allocation concealment (selection bias)                   | Unclear risk              | Insufficient information                                                                                                                                                                                                                      |
| Blinding of participants and personnel (performance bias) | Unclear risk              | Double blinded- however insufficient information to determine whether blind could have been broken                                                                                                                                            |
| Blinding of outcome assessment (detection bias)           | Unclear risk              | Insufficient information                                                                                                                                                                                                                      |
| Incomplete outcome data (attrition bias)                  | Low risk                  | Low numbers of dropout due to adverse events (3% PGB, 5% Placebo), however no information on total numbers of dropout (or other reasons for dropout)                                                                                          |
| Selective reporting (reporting bias)                      | Unclear risk              | The weekly mean pain DPRS score was listed as a secondary efficacy outcome in protocol, but included in the primary outcomes in publication. Also, final report introduced DAAC (Duration-adjusted average change score) as a primary outcome |
| Other bias                                                | High risk                 | All study investigators had financial ties to the study sponsor                                                                                                                                                                               |

## Holbech 2015

### Risk of bias table

| <b>Bias</b>                                               | <b>Authors' judgement</b> | <b>Support for judgement</b>                                                                                                                                      |
|-----------------------------------------------------------|---------------------------|-------------------------------------------------------------------------------------------------------------------------------------------------------------------|
| Random sequence generation (selection bias)               | Low risk                  | Computer-generated randomization                                                                                                                                  |
| Allocation concealment (selection bias)                   | Low risk                  | Randomization plan was generated by a person at a pharmacy not otherwise involved in the trial; Sealed, opaque envelopes used in emergency situations.            |
| Blinding of participants and personnel (performance bias) | Low risk                  | Double-blinded (patients, investigators and all other staff). Identical tablets.                                                                                  |
| Blinding of outcome assessment (detection bias)           | Low risk                  | Patients, investigators, and all other staff involved in the conduct of the trial were blinded to individual treatment assignments for the duration of the study. |
| Incomplete outcome data (attrition bias)                  | Low risk                  | Acceptable numbers of drop out (5% placebo, 17% pregabalin). Reasons provided (withdrawn consent, adverse events)                                                 |
| Selective reporting (reporting bias)                      | Unclear risk              | All but 2 of the secondary outcomes in the protocol have been omitted and re-analysed as "exploratory" outcomes in the final analysis.                            |
| Other bias                                                | High risk                 | Majority of trial investigators had financial ties to the study sponsor                                                                                           |

## Huffman 2015

### Risk of bias table

| <b>Bias</b>                                               | <b>Authors' judgement</b> | <b>Support for judgement</b>                                                               |
|-----------------------------------------------------------|---------------------------|--------------------------------------------------------------------------------------------|
| Random sequence generation (selection bias)               | Low risk                  | Computer-generated codes                                                                   |
| Allocation concealment (selection bias)                   | Unclear risk              | Not described                                                                              |
| Blinding of participants and personnel (performance bias) | Unclear risk              | Not described                                                                              |
| Blinding of outcome assessment (detection bias)           | Unclear risk              | Not described                                                                              |
| Incomplete outcome data (attrition bias)                  | Low risk                  | Drop-out rates not significantly different between groups. Reasons for drop-outs specified |
| Selective reporting (reporting bias)                      | Low risk                  | Outcomes reported as specified in protocol                                                 |
| Other bias                                                | High risk                 | All authors have, or have had financial ties to pharmaceutical industry                    |

## Kanodia 2011

### Risk of bias table

| <b>Bias</b>                                               | <b>Authors' judgement</b> | <b>Support for judgement</b>                                                                                            |
|-----------------------------------------------------------|---------------------------|-------------------------------------------------------------------------------------------------------------------------|
| Random sequence generation (selection bias)               | Unclear risk              | Insufficient information                                                                                                |
| Allocation concealment (selection bias)                   | Unclear risk              | Insufficient information                                                                                                |
| Blinding of participants and personnel (performance bias) | Unclear risk              | States that it is a double blind trial, but there are no details of how this was performed (or who was blinded).        |
| Blinding of outcome assessment (detection bias)           | Unclear risk              | Insufficient information                                                                                                |
| Incomplete outcome data (attrition bias)                  | Unclear risk              | No details given about whether there was attrition or explanation.                                                      |
| Selective reporting (reporting bias)                      | Unclear risk              | Pre-specified outcomes in methods match those found in results. Poor reporting of outcomes from each intervention group |
| Other bias                                                | Unclear risk              | Very small sample size                                                                                                  |



## Kim 2011

### Risk of bias table

| <b>Bias</b>                                               | <b>Authors' judgement</b> | <b>Support for judgement</b>                                                                                             |
|-----------------------------------------------------------|---------------------------|--------------------------------------------------------------------------------------------------------------------------|
| Random sequence generation (selection bias)               | Low risk                  | Computer generated schedule                                                                                              |
| Allocation concealment (selection bias)                   | Low risk                  | Centralised telorandomisation system (IMPALA)                                                                            |
| Blinding of participants and personnel (performance bias) | Unclear risk              | Matching placebo; double-blinded; unclear whether dientical in appearance                                                |
| Blinding of outcome assessment (detection bias)           | Unclear risk              | Insufficient information                                                                                                 |
| Incomplete outcome data (attrition bias)                  | Unclear risk              | Acceptable rates of drop out (15% pregabalin, 17% placebo). Reasons for discontinuation provided. ITT analysis performed |
| Selective reporting (reporting bias)                      | High risk                 | Daily Sleep interference scale (DSIS) omitted as a secondary outcome.                                                    |
| Other bias                                                | High risk                 | All study authors except one had financial ties to the study sponsor                                                     |

## Krcevski Škvarč 2010

### Risk of bias table

| <b>Bias</b>                                               | <b>Authors' judgement</b> | <b>Support for judgement</b>                                                                                                                                                                                           |
|-----------------------------------------------------------|---------------------------|------------------------------------------------------------------------------------------------------------------------------------------------------------------------------------------------------------------------|
| Random sequence generation (selection bias)               | Unclear risk              | Insufficient information                                                                                                                                                                                               |
| Allocation concealment (selection bias)                   | Unclear risk              | Insufficient information                                                                                                                                                                                               |
| Blinding of participants and personnel (performance bias) | Unclear risk              | Insufficient information                                                                                                                                                                                               |
| Blinding of outcome assessment (detection bias)           | Unclear risk              | Insufficient information                                                                                                                                                                                               |
| Incomplete outcome data (attrition bias)                  | High risk                 | High rates of attrition (64% pregabalin, 40% placebo). Reasons for study discontinuation provided. ITT analysis performed and reported.                                                                                |
| Selective reporting (reporting bias)                      | Low risk                  | Outcomes specified in the methods match those reported in the results                                                                                                                                                  |
| Other bias                                                | Unclear risk              | Some differences in baseline characteristics; proportion taking antiviral therapy higher in pregabalin group, differences in distribution of zoster and severity of rash. The study authors had no competing interests |

## Lesser 2004

### Risk of bias table

| <b>Bias</b>                                               | <b>Authors' judgement</b> | <b>Support for judgement</b>                                                                                                                                                                                                                          |
|-----------------------------------------------------------|---------------------------|-------------------------------------------------------------------------------------------------------------------------------------------------------------------------------------------------------------------------------------------------------|
| Random sequence generation (selection bias)               | Unclear risk              | Insufficient information as to how it was generated                                                                                                                                                                                                   |
| Allocation concealment (selection bias)                   | Low risk                  | Code was maintained by the Clinical Pharmacy Operations department, with no access by other individuals or departments. Medication was shipped to the sites in blocks in unit-dose trays. Each patient was assigned the next sequential random number |
| Blinding of participants and personnel (performance bias) | Unclear risk              | Each patient took one small and two larger capsules, with the proper mix of active medication and placebo, for each dose to achieve double-blinding. Does not specify that the active intervention and placebo were identical                         |
| Blinding of outcome assessment (detection bias)           | Low risk                  | Blinding was maintained until all decisions regarding data evaluability were made                                                                                                                                                                     |
| Incomplete outcome data (attrition bias)                  | Unclear risk              | Low drop out rates (8% placebo, 11% PGB). Only states that 18/35 dropouts were due to adverse events.                                                                                                                                                 |
| Selective reporting (reporting bias)                      | Low risk                  | Pre-specified outcomes in methods match those found in results.                                                                                                                                                                                       |
| Other bias                                                | High risk                 | Baseline characteristics: more people in placebo group taking antidiabetic medication (insulin) compared to PGB group. More T1DM and T2DM in placebo group. The study authors had financial ties to the sponsor.                                      |

## Liu 2015

### Risk of bias table

| <b>Bias</b>                                               | <b>Authors' judgement</b> | <b>Support for judgement</b>                                                                                      |
|-----------------------------------------------------------|---------------------------|-------------------------------------------------------------------------------------------------------------------|
| Random sequence generation (selection bias)               | Unclear risk              | Insufficient information                                                                                          |
| Allocation concealment (selection bias)                   | Low risk                  | Interactive voice response system                                                                                 |
| Blinding of participants and personnel (performance bias) | Unclear risk              | Placebo was matched to pregabalin. Not specified whether active and placebo pills were identical in appearance    |
| Blinding of outcome assessment (detection bias)           | Unclear risk              | Insufficient information.                                                                                         |
| Incomplete outcome data (attrition bias)                  | Low risk                  | Acceptable drop out rates (12% pregabalin, 16% placebo). Reasons for withdrawal provided. ITT analysis performed. |
| Selective reporting (reporting bias)                      | High risk                 | Omitted pre-specified secondary outcomes relating to the HADS Anxiety and Depression score.                       |
| Other bias                                                | Unclear risk              | Two authors had financial ties to the study sponsor                                                               |

## Mathieson 2017

### Risk of bias table

| <b>Bias</b>                                               | <b>Authors' judgement</b> | <b>Support for judgement</b>                                                                                                                                                                                                                                                                    |
|-----------------------------------------------------------|---------------------------|-------------------------------------------------------------------------------------------------------------------------------------------------------------------------------------------------------------------------------------------------------------------------------------------------|
| Random sequence generation (selection bias)               | Low risk                  | Computer-derived random-number sequence                                                                                                                                                                                                                                                         |
| Allocation concealment (selection bias)                   | Low risk                  | Packaged in white, opaque, sealed containers                                                                                                                                                                                                                                                    |
| Blinding of participants and personnel (performance bias) | Unclear risk              | Pregabalin capsules and matching placebo capsules. Unclear whether they were identical in appearance                                                                                                                                                                                            |
| Blinding of outcome assessment (detection bias)           | Low risk                  | Some outcomes were assessed by means of telephone contact with the patients by trained trial researchers, but reports that all the research staff, statisticians, trial clinicians, and patients were unaware of the trial-group assignments during recruitment, data collection, and analysis. |
| Incomplete outcome data (attrition bias)                  | Low risk                  | Acceptable number of drop outs (16% pregabalin, 14% placebo). Reasons provided. ITT analysis performed (although it did not include 2 randomised patients).                                                                                                                                     |
| Selective reporting (reporting bias)                      | High risk                 | The primary outcome was measured at fewer time points than was specified in the protocol which specified pain intensity would be measured at baseline then weeks 2,4,8,12,26 and 52. Study reported pain only at weeks 8, 52. All other outcomes remained the same as pre-specified.            |
| Other bias                                                | Unclear risk              | Some differences in baseline characteristics, such as sex, dermatomal pain, neurologic deficit, clinically suspected level of spine associated with leg pain, and PainDETECT scores. Three authors had financial ties to the pharmaceutical industry                                            |

## Moon 2010

### Risk of bias table

| <b>Bias</b>                                               | <b>Authors' judgement</b> | <b>Support for judgement</b>                                                                                                              |
|-----------------------------------------------------------|---------------------------|-------------------------------------------------------------------------------------------------------------------------------------------|
| Random sequence generation (selection bias)               | Low risk                  | Computerized tele-randomization system                                                                                                    |
| Allocation concealment (selection bias)                   | Low risk                  | Central web–telephone software                                                                                                            |
| Blinding of participants and personnel (performance bias) | Low risk                  | Mentions double-blinded; "pregabalin and matching placebo"                                                                                |
| Blinding of outcome assessment (detection bias)           | Low risk                  | Study report does not specify, although protocol states that the outcome assessors were blinded.                                          |
| Incomplete outcome data (attrition bias)                  | Unclear risk              | Uneven numbers of drop out (14.8% pregabalin, 20.5% placebo), however reasons for drop out provided. ITT analysis performed and reported. |
| Selective reporting (reporting bias)                      | Low risk                  | All pre-specified outcomes in protocol reported.                                                                                          |
| Other bias                                                | Unclear risk              | The authors fail to declare whether they had financial ties to Pfizer.                                                                    |

## Rauck 2013

### Risk of bias table

| <b>Bias</b>                                               | <b>Authors' judgement</b> | <b>Support for judgement</b>                                                                                                                                                        |
|-----------------------------------------------------------|---------------------------|-------------------------------------------------------------------------------------------------------------------------------------------------------------------------------------|
| Random sequence generation (selection bias)               | Low risk                  | Computer-generated sequence                                                                                                                                                         |
| Allocation concealment (selection bias)                   | Low risk                  | Drug containers of identical appearance                                                                                                                                             |
| Blinding of participants and personnel (performance bias) | Low risk                  | PGB was provided with identical-in-appearance placebo capsules to ensure blinding of subjects and investigators. All tablets were provided by an unblinded, third-party pharmacist. |
| Blinding of outcome assessment (detection bias)           | Low risk                  | Study does not provide sufficient information, although trial protocol does state that the outcome assessors were blinded.                                                          |
| Incomplete outcome data (attrition bias)                  | Unclear risk              | Reasons for dropout reported although attrition rates were 29% for pregabalin and 25% for placebo.                                                                                  |
| Selective reporting (reporting bias)                      | Low risk                  | Reports all pre-specified outcomes from the protocol.                                                                                                                               |
| Other bias                                                | High risk                 | The authors had financial ties to the sponsor                                                                                                                                       |

## Richter 2005

### Risk of bias table

| <b>Bias</b>                                               | <b>Authors' judgement</b> | <b>Support for judgement</b>                                                                                                                                               |
|-----------------------------------------------------------|---------------------------|----------------------------------------------------------------------------------------------------------------------------------------------------------------------------|
| Random sequence generation (selection bias)               | Low risk                  | computer generated sequence                                                                                                                                                |
| Allocation concealment (selection bias)                   | Unclear risk              | Insufficient information                                                                                                                                                   |
| Blinding of participants and personnel (performance bias) | Low risk                  | Study capsules were identical (doses were also matched to size of tablets for both pregabalin and placebo)                                                                 |
| Blinding of outcome assessment (detection bias)           | Unclear risk              | Blind was maintained until completion of study and data evaluability determination however does not specify whether outcome assessors or other investigators were blinded. |
| Incomplete outcome data (attrition bias)                  | Low risk                  | Acceptable attrition rates (15% placebo, 5% PGB 150mg/d, 12% PGB 600mg/d [overall 9% pregabalin]). Reasons for drop out provided.                                          |
| Selective reporting (reporting bias)                      | Low risk                  | Outcomes specified in the Methods match those reported in the results.                                                                                                     |
| Other bias                                                | High risk                 | Two-thirds of the authors had financial ties to the study sponsor                                                                                                          |



## Rosenstock 2004

### Risk of bias table

| <b>Bias</b>                                               | <b>Authors' judgement</b> | <b>Support for judgement</b>                                                                                                                                                            |
|-----------------------------------------------------------|---------------------------|-----------------------------------------------------------------------------------------------------------------------------------------------------------------------------------------|
| Random sequence generation (selection bias)               | Unclear risk              | Sequential randomization numbers according to a randomization schedule designed to attain an even distribution between pregabalin and placebo. Unclear how this sequence was generated. |
| Allocation concealment (selection bias)                   | Low risk                  | Study medication was packaged and labeled with sequential randomization numbers.                                                                                                        |
| Blinding of participants and personnel (performance bias) | Unclear risk              | All medications were packaged in blinded fashion. Not specified whether the active intervention and placebo were identical in appearance                                                |
| Blinding of outcome assessment (detection bias)           | Unclear risk              | Insufficient information                                                                                                                                                                |
| Incomplete outcome data (attrition bias)                  | Low risk                  | Acceptable attrition rates (14% pregabalin, 11% placebo). Reasons for withdrawal provided. ITT analysis performed.                                                                      |
| Selective reporting (reporting bias)                      | Low risk                  | Outcomes specified in the Methods match those reported in the results.                                                                                                                  |
| Other bias                                                | Unclear risk              | The authors did not state whether they had any competing interests                                                                                                                      |

## Sabatowski 2004

### Risk of bias table

| <b>Bias</b>                                               | <b>Authors' judgement</b> | <b>Support for judgement</b>                                                                                                                                                                                                                                     |
|-----------------------------------------------------------|---------------------------|------------------------------------------------------------------------------------------------------------------------------------------------------------------------------------------------------------------------------------------------------------------|
| Random sequence generation (selection bias)               | Low risk                  | Computer-generated code                                                                                                                                                                                                                                          |
| Allocation concealment (selection bias)                   | Low risk                  | Study medication was packaged and labeled with sequential randomisation numbers                                                                                                                                                                                  |
| Blinding of participants and personnel (performance bias) | Unclear risk              | All medications were blinded and taken orally. Placebo capsules were identical in appearance to capsules containing active drug. However, an investigator could break the randomisation code and, thus, the blind for a patient if a medical emergency occurred. |
| Blinding of outcome assessment (detection bias)           | Unclear risk              | Insufficient information                                                                                                                                                                                                                                         |
| Incomplete outcome data (attrition bias)                  | Unclear risk              | Reasons for dropout provided, however unequal attrition rates across the groups (12.3% PGB 150mg/d, 21.1% PGB 300mg/d, Overall PGB 16.6%, 24.7% Placebo). Both ITT and PPA reported but ITT value used in abstract.                                              |
| Selective reporting (reporting bias)                      | Unclear risk              | Results of CGIC are not reported, just states that it shows a "statistically significant improvement".                                                                                                                                                           |
| Other bias                                                | High risk                 | Majority of the investigators had financial ties to the study sponsor                                                                                                                                                                                            |

## Satoh 2011

### Risk of bias table

| <b>Bias</b>                                               | <b>Authors' judgement</b> | <b>Support for judgement</b>                                                                                                                                                      |
|-----------------------------------------------------------|---------------------------|-----------------------------------------------------------------------------------------------------------------------------------------------------------------------------------|
| Random sequence generation (selection bias)               | High risk                 | Allocation based on the results of a laboratory test (CrCl)                                                                                                                       |
| Allocation concealment (selection bias)                   | Low risk                  | Centrally organised using a validated web-based system.                                                                                                                           |
| Blinding of participants and personnel (performance bias) | Unclear risk              | Insufficient information                                                                                                                                                          |
| Blinding of outcome assessment (detection bias)           | Unclear risk              | Insufficient information                                                                                                                                                          |
| Incomplete outcome data (attrition bias)                  | High risk                 | Unequal dropout across the groups (11.8% placebo, 14.7% 300 mg/day PGB, 28.9% in the 600 mg/day PGB). All reasons for attrition were not provided.                                |
| Selective reporting (reporting bias)                      | High risk                 | Secondary outcome added in published study: patient impression of subjective symptoms (including numbness, pain and paraesthesia) which showed favourable results for pregabalin. |
| Other bias                                                | High risk                 | All authors had financial ties to the study sponsor                                                                                                                               |

## Shabbir 2011

### Risk of bias table

| Bias                                                      | Authors' judgement | Support for judgement                                                                                                                                                                                                                                     |
|-----------------------------------------------------------|--------------------|-----------------------------------------------------------------------------------------------------------------------------------------------------------------------------------------------------------------------------------------------------------|
| Random sequence generation (selection bias)               | Unclear risk       | Insufficient information                                                                                                                                                                                                                                  |
| Allocation concealment (selection bias)                   | Unclear risk       | Insufficient information                                                                                                                                                                                                                                  |
| Blinding of participants and personnel (performance bias) | Unclear risk       | Insufficient information                                                                                                                                                                                                                                  |
| Blinding of outcome assessment (detection bias)           | Unclear risk       | Insufficient information                                                                                                                                                                                                                                  |
| Incomplete outcome data (attrition bias)                  | Low risk           | <u>Appears to be no attrition from either of the randomised groups.</u>                                                                                                                                                                                   |
| Selective reporting (reporting bias)                      | Low risk           | Outcomes specified in the methods match those reported in the results.                                                                                                                                                                                    |
| Other bias                                                | High risk          | Baseline characteristics table not provided to compare across the intervention arms. Pregabalin was administered twice daily; daily frequency of placebo administration not specified. The authors did not state whether they had any competing interests |

## Siddall 2006

### Risk of bias table

| <b>Bias</b>                                               | <b>Authors' judgement</b> | <b>Support for judgement</b>                                                                                                    |
|-----------------------------------------------------------|---------------------------|---------------------------------------------------------------------------------------------------------------------------------|
| Random sequence generation (selection bias)               | Low risk                  | Computer generated                                                                                                              |
| Allocation concealment (selection bias)                   | Low risk                  | Study medication was packaged and labeled with sequential randomization numbers according to the randomization schedule         |
| Blinding of participants and personnel (performance bias) | Low risk                  | Medication was blinded by using capsules of identical size, color, taste, and smell for placebo and pregabalin                  |
| Blinding of outcome assessment (detection bias)           | Unclear risk              | Insufficient information                                                                                                        |
| Incomplete outcome data (attrition bias)                  | Unclear risk              | High (and uneven) attrition rates: pregabalin 30%, placebo 45%. Reasons for withdrawal provided. ITT analysis results reported. |
| Selective reporting (reporting bias)                      | Low risk                  | Outcomes specified in the Methods match those reported in the results.                                                          |
| Other bias                                                | High risk                 | All trial investigators had financial ties to the study sponsor                                                                 |

## Simpson 2010

### Risk of bias table

| <b>Bias</b>                                               | <b>Authors' judgement</b> | <b>Support for judgement</b>                                                                                                                                   |
|-----------------------------------------------------------|---------------------------|----------------------------------------------------------------------------------------------------------------------------------------------------------------|
| Random sequence generation (selection bias)               | Low risk                  | Computer-generated sequence                                                                                                                                    |
| Allocation concealment (selection bias)                   | Low risk                  | Central computerized telorandomization system, ensured that investigators remained blinded to treatment assignments during the study                           |
| Blinding of participants and personnel (performance bias) | Low risk                  | Study drug and placebo were identical in appearance in order to preserve blinding.                                                                             |
| Blinding of outcome assessment (detection bias)           | Low risk                  | Study does not provide sufficient information, although trial protocol does state that the outcome assessors were blinded.                                     |
| Incomplete outcome data (attrition bias)                  | Low risk                  | Similar rates of attrition (21% pregabalin, 19% placebo). Reasons for drop out provided, however not all randomised patients are included in the ITT analysis. |
| Selective reporting (reporting bias)                      | High risk                 | Prespecified outcomes (assessing QANeP) omitted in final study. Safety outcomes not prespecified in protocol added to final study.                             |
| Other bias                                                | High risk                 | All trial investigators had, or have had financial ties to the study sponsor                                                                                   |

## Simpson 2014

### Risk of bias table

| <b>Bias</b>                                               | <b>Authors' judgement</b> | <b>Support for judgement</b>                                                                                                                                           |
|-----------------------------------------------------------|---------------------------|------------------------------------------------------------------------------------------------------------------------------------------------------------------------|
| Random sequence generation (selection bias)               | Unclear risk              | Computer generated "pseudorandom" code                                                                                                                                 |
| Allocation concealment (selection bias)                   | Low risk                  | Automated telrandomization system.                                                                                                                                     |
| Blinding of participants and personnel (performance bias) | Low risk                  | Patients were randomised in a double blind fashion through study sponsors sysetm for randomization and dispensing.                                                     |
| Blinding of outcome assessment (detection bias)           | Unclear risk              | Participants, investigators and study sponsor personnel were blinded to interventions after treatment assignment, but unclear whether this includes outcome assessors. |
| Incomplete outcome data (attrition bias)                  | High risk                 | Reasons provided for drop outs though there is a high attrition rate (31% pregabalin, 31% placebo).                                                                    |
| Selective reporting (reporting bias)                      | Low risk                  | Outcomes specified in the protocol match those reported in the study.                                                                                                  |
| Other bias                                                | High risk                 | Study prematurely terminated by Pfizer following unfavourable results. All trial investigators had financial ties to the study sponsor                                 |

## Stacey 2008

### Risk of bias table

| <b>Bias</b>                                               | <b>Authors' judgement</b> | <b>Support for judgement</b>                                                                                                                          |
|-----------------------------------------------------------|---------------------------|-------------------------------------------------------------------------------------------------------------------------------------------------------|
| Random sequence generation (selection bias)               | Unclear risk              | Insufficient information                                                                                                                              |
| Allocation concealment (selection bias)                   | Unclear risk              | Insufficient information                                                                                                                              |
| Blinding of participants and personnel (performance bias) | Unclear risk              | Insufficient information; reports double-blinded but unclear who is blinded.                                                                          |
| Blinding of outcome assessment (detection bias)           | Unclear risk              | Insufficient information                                                                                                                              |
| Incomplete outcome data (attrition bias)                  | Unclear risk              | Rates of attrition are not comparable across the groups (5.5% flexible dose PGB, 20.5% fixed dose PGB, 16.7% Placebo). Reasons for drop out provided. |
| Selective reporting (reporting bias)                      | Low risk                  | Outcomes specified in the methods match those reported in the results.                                                                                |
| Other bias                                                | High risk                 | All authors had financial ties to the study sponsor                                                                                                   |



## Tolle 2008

### Risk of bias table

| <b>Bias</b>                                               | <b>Authors' judgement</b> | <b>Support for judgement</b>                                                                                                                                                                  |
|-----------------------------------------------------------|---------------------------|-----------------------------------------------------------------------------------------------------------------------------------------------------------------------------------------------|
| Random sequence generation (selection bias)               | Unclear risk              | Insufficient information                                                                                                                                                                      |
| Allocation concealment (selection bias)                   | Unclear risk              | Insufficient information                                                                                                                                                                      |
| Blinding of participants and personnel (performance bias) | Unclear risk              | Insufficient information                                                                                                                                                                      |
| Blinding of outcome assessment (detection bias)           | Unclear risk              | Insufficient information                                                                                                                                                                      |
| Incomplete outcome data (attrition bias)                  | Low risk                  | Similar attrition rates across the groups (Placebo 17.7%, PGB 150mg/d 17.2%, PGB 300mg/d 20.2%, PGB 300/600mg/d 22.8%). Reasons for withdrawal provided. ITT analysis performed and reported. |
| Selective reporting (reporting bias)                      | High risk                 | EuroQoL Health Utilities Index not reported in final results (although mentioned in the abstract and methods).                                                                                |
| Other bias                                                | High risk                 | All authors had financial ties to the study sponsor                                                                                                                                           |

## van Seventer 2006

### Risk of bias table

| <b>Bias</b>                                               | <b>Authors' judgement</b> | <b>Support for judgement</b>                                                                                                                                                  |
|-----------------------------------------------------------|---------------------------|-------------------------------------------------------------------------------------------------------------------------------------------------------------------------------|
| Random sequence generation (selection bias)               | Unclear risk              | Insufficient information                                                                                                                                                      |
| Allocation concealment (selection bias)                   | Unclear risk              | Insufficient information                                                                                                                                                      |
| Blinding of participants and personnel (performance bias) | Unclear risk              | Insufficient information although states double-blinded.                                                                                                                      |
| Blinding of outcome assessment (detection bias)           | Unclear risk              | Insufficient information                                                                                                                                                      |
| Incomplete outcome data (attrition bias)                  | Unclear risk              | High attrition rates across the groups (36.6% placebo, 29.9% PGB 150mg/d, 36.7% PGB 300mg/d, 36.6% PGB 300/600mg/d). Reasons for withdrawal provided. ITT analysis performed. |
| Selective reporting (reporting bias)                      | Low risk                  | Outcomes specified in the methods match those reported in the results.                                                                                                        |
| Other bias                                                | High risk                 | All study authors had financial ties to the study sponsor                                                                                                                     |

## van Seventer 2010

### Risk of bias table

| <b>Bias</b>                                               | <b>Authors' judgement</b> | <b>Support for judgement</b>                                                                                                                                                                                                                                                                                                                                                                                                                                                                                            |
|-----------------------------------------------------------|---------------------------|-------------------------------------------------------------------------------------------------------------------------------------------------------------------------------------------------------------------------------------------------------------------------------------------------------------------------------------------------------------------------------------------------------------------------------------------------------------------------------------------------------------------------|
| Random sequence generation (selection bias)               | Unclear risk              | Insufficient information.                                                                                                                                                                                                                                                                                                                                                                                                                                                                                               |
| Allocation concealment (selection bias)                   | Low risk                  | An Interactive Voice Recognition System was used.                                                                                                                                                                                                                                                                                                                                                                                                                                                                       |
| Blinding of participants and personnel (performance bias) | Low risk                  | Medication was blinded by using capsules of identical size, color, taste and smell for placebo, and pregabalin.                                                                                                                                                                                                                                                                                                                                                                                                         |
| Blinding of outcome assessment (detection bias)           | Low risk                  | Trial protocol specifies that outcome assessor was blinded.                                                                                                                                                                                                                                                                                                                                                                                                                                                             |
| Incomplete outcome data (attrition bias)                  | Low risk                  | Reasons for discontinuation provided, attrition rates comparable across the groups- 24.4% for pregabalin, 22.8% for placebo. ITT analysis performed (although excluded one patient from each group due to lack of post-baseline data).                                                                                                                                                                                                                                                                                  |
| Selective reporting (reporting bias)                      | High risk                 | Protocol specified CGIC a secondary outcome however this was omitted in published report. Other omitted outcomes include Pain Treatment Satisfaction Scale (PTSS)- Impact of current pain medication, satisfaction with current pain medication, medication characteristics, efficacy; Neuropathic Pain Symptom Inventory total intensity score, Medical Outcome Study Cognitive Subscale (reasoning, concentration, confusion, memory, attention, thinking); Davidson Trauma scale (severity, frequency, total score). |
| Other bias                                                | High risk                 | All study authors had financial ties to the study sponsor                                                                                                                                                                                                                                                                                                                                                                                                                                                               |

## Vranken 2008

### Risk of bias table

| <b>Bias</b>                                               | <b>Authors' judgement</b> | <b>Support for judgement</b>                                                                                                                                                                       |
|-----------------------------------------------------------|---------------------------|----------------------------------------------------------------------------------------------------------------------------------------------------------------------------------------------------|
| Random sequence generation (selection bias)               | Low risk                  | Randomized according to the automated assignment system                                                                                                                                            |
| Allocation concealment (selection bias)                   | Low risk                  | Hospital pharmacist prepared identical, coded medication bottles containing identical capsules of pregabalin or placebo. Unclear if pharmacist was otherwise involved in the study or third party. |
| Blinding of participants and personnel (performance bias) | Low risk                  | Coded medication bottle was supplied by hospital pharmacist to the blinded treating physician. Medication bottle contained identical capsules.                                                     |
| Blinding of outcome assessment (detection bias)           | Unclear risk              | Insufficient information                                                                                                                                                                           |
| Incomplete outcome data (attrition bias)                  | Low risk                  | Reasonable rates of attrition (15% pregabalin, 20% of placebo). Reasons for discontinuation provided.                                                                                              |
| Selective reporting (reporting bias)                      | Low risk                  | Outcomes specified in the methods match those reported in the results.                                                                                                                             |
| Other bias                                                | Unclear risk              | Some differences in baseline characteristics including site of pain and concomitant therapies. The authors did not report whether they had any competing interests                                 |
