# Supplementary material for: Benefits and harms of pregabalin in the management of neuropathic pain: a rapid review and meta-analysis of randomised clinical trials
Source: PubMed Central journal article supplement — BMJ Open. 2019 Jan 21;9(1):e023600. doi: 10.1136/bmjopen-2018-023600 (PMC6347863; doi:10.1136/bmjopen-2018-023600), 2019-01-21
Supplement: bmjopen-2018-023600supp006.pdf [file bmjopen-2018-023600supp006.pdf]

**Appendix Table 1: Benefits and harms of pregabalin in the management of neuropathic pain**

| Outcome                                        | Overall analysis                                                        | Subgroup analyses                                                      |                                                                          | Test for subgroup differences   |
|------------------------------------------------|-------------------------------------------------------------------------|------------------------------------------------------------------------|--------------------------------------------------------------------------|---------------------------------|
|                                                |                                                                         | Central neuropathic pain                                               | Peripheral neuropathic pain                                              |                                 |
| Mean change in pain scores - NRS               | (n = 5093): SMD -0.49 (-0.66 to -0.32, P < 0.00001, I <sup>2</sup> =88% | (n = 785): SMD -0.38 (-0.80 to 0.04), P = 0.08, I <sup>2</sup> =89%    | (n = 4308): SMD -0.52 (-0.71 to -0.33), P < 0.00001, I <sup>2</sup> =88% | P = 0.56, I <sup>2</sup> =0%    |
| Mean change in sleep interference scores - NRS | (n = 1641): SMD -0.38 (-0.50 to -0.26, P < 0.00001, I <sup>2</sup> =32% | (n = 357): SMD -0.49 (-0.70 to -0.28), P < 0.00001, I <sup>2</sup> =0% | (n = 1284): SMD -0.35 (-0.50 to -0.19), P < 0.0001, I <sup>2</sup> =45%  | P = 0.30, I <sup>2</sup> =8%    |
| Mean change in HADS-anxiety scores             | (n = 1041): SMD -0.12 (-0.29 to 0.04, P = 0.14, I <sup>2</sup> =44%     | (n = 418): SMD -0.27 (-0.46 to -0.08, P = 0.006, I <sup>2</sup> =0%    | (n = 623): SMD -0.00 (-0.16 to 0.15, P = 0.97, I <sup>2</sup> =0%        | P = 0.04, I <sup>2</sup> =77.2% |
| Mean change in HADS-depression scores          | (n = 1041): SMD -0.06 (-0.26 to 0.13, P = 0.54, I <sup>2</sup> =60%     | (n = 418): SMD -0.16 (-0.41 to 0.10, P = 0.23, I <sup>2</sup> =44%     | (n = 623): SMD 0.02 (-0.28 to 0.32, P = 0.90, I <sup>2</sup> =71%        | P = 0.38, I <sup>2</sup> =8%    |
| Overall adverse events                         | (n = 4010): RR 1.33 (1.23 to 1.44), P < 0.00001, I <sup>2</sup> =52%    | (n = 489): RR 1.33 (1.20 to 1.47), P < 0.00001, I <sup>2</sup> =0%     | (n = 3225): RR 1.34 (1.21 to 1.47), P < 0.00001, I <sup>2</sup> =61%     | P = 0.92, I <sup>2</sup> =0%    |
| Adverse event: weight gain                     | (n = 3636): RR 4.58, (2.88 to 7.28), P < 0.00001, I <sup>2</sup> =0%    | (n = 428): RR 3.77 (0.94 to 15.08), P = 0.06, I <sup>2</sup> =0%       | (n = 3636): RR 4.69 (2.87 to 7.68), P < 0.00001, I <sup>2</sup> =0%      | P = 0.77, I <sup>2</sup> =0%    |
| Adverse event: somnolence                      | (n = 5695): RR 2.84, (2.36 to 3.42), P < 0.00001, I <sup>2</sup> =0%    | (n = 785): RR 3.18 (2.16 to 4.68), P < 0.00001, I <sup>2</sup> =0%     | (n = 4910): RR 2.74 (2.22 to 3.40), P < 0.00001, I <sup>2</sup> =1%      | P = 0.51, I <sup>2</sup> =0%    |
| Adverse event: dizziness                       | (n = 5732): RR 2.94 (2.30 to 3.74), P < 0.00001, I <sup>2</sup> =63%    | (n = 785): RR 3.38 (2.46 to 4.63), P < 0.00001, I <sup>2</sup> =0%     | (n = 4947): RR 2.89 (2.17 to 3.85), P < 0.00001, I <sup>2</sup> =67%     | P = 0.48, I <sup>2</sup> =0%    |
| Adverse event: peripheral edema                | (n = 5001): RR 2.63 (1.86 to 3.73), P < 0.00001, I <sup>2</sup> =41%    | (n = 439): RR 3.90 (1.63 to 9.36), P = 0.002, I <sup>2</sup> =0%       | (n = 4562): RR 2.53 (1.74 to 3.68), P < 0.00001, I <sup>2</sup> =44%     | P = 0.37, I <sup>2</sup> =0%    |
| Adverse event: fatigue*                        | (n = 3958): RR 1.83 (1.32 to 2.54), P = 0.0003, I <sup>2</sup> =14%     | N/A                                                                    | N/A                                                                      | N/A                             |
| Adverse event: visual disturbance              | (n = 2814): RR 2.50 (1.53 to 4.09), P = 0.0003, I <sup>2</sup> =6%      | (n = 566): RR 4.05 (1.27 to 12.91), P = 0.02, I <sup>2</sup> =0%       | (n = 2248): RR 2.36 (1.32 to 4.22), P = 0.004, I <sup>2</sup> =16%       | P = 0.42, I <sup>2</sup> =0%    |
| Adverse event: ataxia**                        | (n = 1045): RR 5.49 (1.84 to 16.36), P = 0.002, I <sup>2</sup> =0%      | N/A                                                                    | N/A                                                                      | N/A                             |
| Adverse event: dry mouth                       | (n = 3873): RR 2.39 (1.66 to 3.44), P < 0.0001, I <sup>2</sup> =16%     | (n = 357): RR 3.75 (1.43 to 9.83), P = 0.007, I <sup>2</sup> =0%       | (n = 3516): RR 2.28 (1.52 to 3.41), P < 0.0001, I <sup>2</sup> =20%      | P = 0.35, I <sup>2</sup> =0%    |
| Adverse event: non-peripheral edema            | (n = 2337): RR 3.51 (1.93 to 6.40), P < 0.0001, I <sup>2</sup> =0%      | (n = 785): RR 3.82 (1.65 to 8.85), P = 0.002, I <sup>2</sup> =0%       | (n = 1552): RR 3.70 (1.36 to 10.06), P = 0.01, I <sup>2</sup> =19%       | P = 0.96, I <sup>2</sup> =0%    |
| Adverse event: vertigo**                       | (n = 1031): RR 3.08 (1.01 to 9.40), P = 0.05, I <sup>2</sup> =30%       | N/A                                                                    | N/A                                                                      | N/A                             |
| Adverse event: euphoria*                       | (n = 1274): RR 8.80 (2.72 to 28.54), P = 0.0003, I <sup>2</sup> =0%     | N/A                                                                    | N/A                                                                      | N/A                             |
| Discontinuation due to adverse events          | (n = 5426): RR 1.91 (1.54 to 2.37), P < 0.00001, I <sup>2</sup> =0%     | (n = 576): RR 1.42 (0.79 to 2.55), P = 0.24, I <sup>2</sup> =0%        | (n = 4850): RR 2.00 (1.58 to 2.55), P < 0.00001, I <sup>2</sup> =6%      | P = 0.29, I <sup>2</sup> =12%   |

Abbreviations: HADS: Hospital anxiety depression scale; NRS: Numerical rating scale; RR: Risk ratio; SMD: Standardized mean difference

\*only one RCT on central neuropathic pain reported adequate data

\*\*all RCTs were in patients with peripheral neuropathic pain
