# Supplementary material for: Benefits and harms of pregabalin in the management of neuropathic pain: a rapid review and meta-analysis of randomised clinical trials
Source: PubMed Central journal article supplement — BMJ Open. 2019 Jan 21;9(1):e023600. doi: 10.1136/bmjopen-2018-023600 (PMC6347863; doi:10.1136/bmjopen-2018-023600), 2019-01-21
Supplement: bmjopen-2018-023600supp007.pdf [file bmjopen-2018-023600supp007.pdf]

**Appendix Table 2: Sensitivity analyses by study quality and duration in clinical trials assessing the benefits and harms of pregabalin in neuropathic pain**

| <b>Outcome</b>                        | <b>Sensitivity analysis based on higher quality studies*</b>                   | <b>Sensitivity analysis based on shorter duration of intervention**</b>             | <b>Sensitivity analysis based on longer duration of intervention***</b>            |
|---------------------------------------|--------------------------------------------------------------------------------|-------------------------------------------------------------------------------------|------------------------------------------------------------------------------------|
| Pain                                  | 5 studies (n = 932): SMD -0.56 (-1.07 to -0.05; P = 0.03; I <sup>2</sup> =92%) | 10 studies (n = 2408): SMD -0.68 (-0.96 to -0.40; P < 0.00001; I <sup>2</sup> =90%) | 10 studies (n = 2685): SMD -0.31 (-0.49 to -0.13; P = 0.0006; I <sup>2</sup> =79%) |
| Adverse events                        | 6 studies (n = 1152): RR 1.17 (1.06 to 1.29; P = 0.002; I <sup>2</sup> =23%)   | 11 studies (n = 2088): RR 1.46 (1.34 to 1.58; P < 0.00001; I <sup>2</sup> =0%)      | 8 studies (n = 1922): RR 1.23 (1.12 to 1.35; P < 0.0001; I <sup>2</sup> =55%)      |
| Serious adverse events                | 3 studies (n = 627): RR 0.59 (0.38 to 0.92; P = 0.02; I <sup>2</sup> =0%)      | 8 studies (n = 2088): RR 0.72 (0.49 to 1.07; P = 0.11; I <sup>2</sup> =0%)          | 7 studies (n = 1674): RR 0.93 (0.55 to 1.59; P = 0.79; I <sup>2</sup> =26%)        |
| Discontinuation due to adverse events | 6 studies (n = 1152): RR 1.22 (0.79 to 1.87; P = 0.37; I <sup>2</sup> =0%)     | 13 studies (n = 2403): RR 1.95 (1.34 to 2.84; P < 0.0005; I <sup>2</sup> =27%)      | 11 studies (n = 3023): RR 1.88 (1.40 to 2.53; P < 0.0001; I <sup>2</sup> =0%)      |

\*Studies that adequately reported randomization and blinding procedures

\*\*Studies duration lasting less than 12 weeks

\*\*\*Studies duration lasting at least 12 weeks
