# Supplementary material for: Benefits and harms of pregabalin in the management of neuropathic pain: a rapid review and meta-analysis of randomised clinical trials
Source: PubMed Central journal article supplement — BMJ Open. 2019 Jan 21;9(1):e023600. doi: 10.1136/bmjopen-2018-023600 (PMC6347863; doi:10.1136/bmjopen-2018-023600), 2019-01-21
Supplement: bmjopen-2018-023600supp008.pdf [file bmjopen-2018-023600supp008.pdf]

**Appendix Table 3: Main results\* of RCTs assessing the benefits and harms of pregabalin in the management of neuropathic pain**

| Study ID              | Pain                                                                                                                           |                                                                                             |                                                                                                                | Sleep Disturbance                                                                                                       |                                                                                     | Quality of Life (EQ-5D)                                                                                                                                         | PGIC                                                                                                                                                                                         | CGIC                                                                                    |
|-----------------------|--------------------------------------------------------------------------------------------------------------------------------|---------------------------------------------------------------------------------------------|----------------------------------------------------------------------------------------------------------------|-------------------------------------------------------------------------------------------------------------------------|-------------------------------------------------------------------------------------|-----------------------------------------------------------------------------------------------------------------------------------------------------------------|----------------------------------------------------------------------------------------------------------------------------------------------------------------------------------------------|-----------------------------------------------------------------------------------------|
|                       | NRS                                                                                                                            | VAS Score                                                                                   | SF-MPQ VAS                                                                                                     | SF-MPQ PPI                                                                                                              | Sleep Interference Scores                                                           |                                                                                                                                                                 |                                                                                                                                                                                              |                                                                                         |
| Arezzo 2008           |                                                                                                                                |                                                                                             | Significantly favoured PGB over PLA (MD -11.06, 95% CI, -18.89 to -3.22; P = 0.006)                            |                                                                                                                         |                                                                                     |                                                                                                                                                                 | Significant improvement with PGB compared to PLA, P= 0.002                                                                                                                                   |                                                                                         |
| Cardenas 2013         |                                                                                                                                |                                                                                             |                                                                                                                |                                                                                                                         |                                                                                     | Significant improvement with PGB over PLA on domains of sleep disturbance, awaken short of breath, sleep quantity, and optimal seep subscales (P<0.05)          | PGIC reported as binary outcome; significantly improved with PGB compared with PLA, P<0.001                                                                                                  | Significant improvement in the PGB arm (P= 0.0294)                                      |
| Dworkin 2003          |                                                                                                                                |                                                                                             | Significantly favoured PGB over PLA (MD -17.62, 95% CI, -25.37 to -9.86; P = 0.0001                            |                                                                                                                         | Significantly favoured PGB over PLA (MD -1.58, 95% CI, -2.19 to -0.97; P = 0.0001)  | Significantly favoured PGB over PLA (MD -9.80, 95% CI, -14.49 to -5.11; P = 0.0001)                                                                             | Significantly improved with PGB versus PLA, P = 0.001                                                                                                                                        |                                                                                         |
| Freyenhagen 2005      | Both flexible- and fixed-dose PGB significantly reduced endpoint mean pain score versus PLA (P=0.002 and P<0.001 respectively) |                                                                                             |                                                                                                                |                                                                                                                         | Significantly improved at endpoint in each PGB treatment group over PLA (P<0.001)   | Significantly favoured PGB over PLA (P<0.05)                                                                                                                    |                                                                                                                                                                                              |                                                                                         |
| Guan 2011             |                                                                                                                                |                                                                                             | Significantly improved with PGB vs PLA LSMD -6.56, 95% CI -11.65 to -1.47, P=0.012                             |                                                                                                                         | Significantly improved with PGB vs PLA: LSMD -0.5, 95% CI -0.93 to -0.07, P=0.023   |                                                                                                                                                                 |                                                                                                                                                                                              |                                                                                         |
| Holbech 2015          |                                                                                                                                |                                                                                             |                                                                                                                |                                                                                                                         | Significantly improved with PGB vs PLA LSMD -0.55, 95% CI -0.93 to -0.17, P=0.004   |                                                                                                                                                                 |                                                                                                                                                                                              |                                                                                         |
| Huffmann 2015         | Significant treatment difference favouring PGB over PLA for DPN pain (P=0.034) and DPN pain on walking (P=0.001)               |                                                                                             |                                                                                                                |                                                                                                                         |                                                                                     |                                                                                                                                                                 | Significant improvements with PGB compared to PLA (P=0.002)                                                                                                                                  |                                                                                         |
| Kanodia 2011          |                                                                                                                                | Significantly improved with PGB compared to PLA: MD -21, 95% CI: -23.8 to -18.2; P = 0.004) |                                                                                                                |                                                                                                                         |                                                                                     |                                                                                                                                                                 |                                                                                                                                                                                              |                                                                                         |
| Kim 2011              |                                                                                                                                |                                                                                             |                                                                                                                |                                                                                                                         | Significantly favoured PGB over PLA (P<0.05)                                        | Significant improvement with PGB over PLA in sleep quantity (P=0.03), sleep adequacy (P=0.13), snoring (P=0.39), and reduced the sleep problems index (P=0.049) | No significant difference between groups at endpoint, MD 0 (95% CI -0.1, 0.1) P= 0.566                                                                                                       | Significant improvement of in PGB group vs PLA: MD -0.3 (95% CI -0.6, 0) (P=0.049)      |
| Krceviski Škvarč 2010 | No significant difference between groups, P values not reported                                                                |                                                                                             |                                                                                                                |                                                                                                                         |                                                                                     |                                                                                                                                                                 |                                                                                                                                                                                              |                                                                                         |
| Lesser 2004           |                                                                                                                                |                                                                                             |                                                                                                                |                                                                                                                         | Significantly favoured PGB over PLA (P=0.0001)                                      |                                                                                                                                                                 |                                                                                                                                                                                              |                                                                                         |
| Liu 2015              |                                                                                                                                |                                                                                             | Significant decrease with PGB compared with PLA: MD -8.18, 95% CI: -11.99 to -4.37; P<0.0001)                  | Significant decrease in with PGB compared with PLA: MD -0.37, 95% CI: -0.58 to -0.16; P=0.0007).                        |                                                                                     | Significantly greater improvements with PGB in subscales of sleep disturbance (P=0.0039) and quantity of sleep (P=0.0035) compared with PLA                     | Significantly improved with PGB versus PLA: LSMD -0.49 95% CI -0.72 to -0.27, P<0.0001                                                                                                       | Significant improvement with PGB versus PLA, LSMD -0.62 95% (CI -0.86, -0.39), P<0.0001 |
| Mathieson 2017        |                                                                                                                                |                                                                                             |                                                                                                                |                                                                                                                         |                                                                                     |                                                                                                                                                                 |                                                                                                                                                                                              |                                                                                         |
| Moon 2010             |                                                                                                                                |                                                                                             |                                                                                                                |                                                                                                                         | Significantly favoured PGB over PLA: LSMD -0.51 (95% CI, -0.96 to -0.07; P = 0.024) | Significantly greater improvements with PGB in subscales of sleep disturbance (P=0.0034) and quantity of sleep (P=0.018) compared with PLA                      | No significant differences in endpoint scores of EQ-5D utility score least squares means 0.03, 95% CI -0.04, 0.09 P= 0.429, or EQ-5D VAS at endpoint LSMD 3.50 (95% CI -1.18, 8.18) P= 0.142 | No statistically significant difference between groups                                  |
| Rauck 2013            |                                                                                                                                |                                                                                             |                                                                                                                |                                                                                                                         | No significant difference between groups: MD 0.11 (95% CI -0.60 to 0.82)            |                                                                                                                                                                 |                                                                                                                                                                                              | No statistically significant difference between groups                                  |
| Richter 2005          |                                                                                                                                |                                                                                             | Significantly favoured PGB 600mg/day over PLA (MD -14.67, 95% CI, -21.92 to -7.41; P = 0.0002). No significant | Significantly favoured PGB 600mg/day over PLA (MD -0.66, 95% CI, -0.97 to -0.35; P = 0.0002). No significant difference | Significantly favoured PGB over PLA: LSMD -1.152; 95% CI -1.752 to -0.551; P=0.0004 |                                                                                                                                                                 |                                                                                                                                                                                              |                                                                                         |

|                   |                                                                                                                                                          |                                                                                                                                                           |                                                                                                                                         |                                                                                   |                                                                                                                                                             |                                                                                                                                                                    |                                                                                                                                                                                        |                                                               |
|-------------------|----------------------------------------------------------------------------------------------------------------------------------------------------------|-----------------------------------------------------------------------------------------------------------------------------------------------------------|-----------------------------------------------------------------------------------------------------------------------------------------|-----------------------------------------------------------------------------------|-------------------------------------------------------------------------------------------------------------------------------------------------------------|--------------------------------------------------------------------------------------------------------------------------------------------------------------------|----------------------------------------------------------------------------------------------------------------------------------------------------------------------------------------|---------------------------------------------------------------|
|                   |                                                                                                                                                          |                                                                                                                                                           | difference between PGB 150mg/day and PLA (MD -4.78, 95% CI, -12.20 to -2.64; P = 0.20)                                                  | between PGB 150 mg/day and PLA (MD -0.17, 95% CI, -0.49 to 0.14; P = 0.28)        |                                                                                                                                                             |                                                                                                                                                                    |                                                                                                                                                                                        |                                                               |
| Rosenstock 2004   |                                                                                                                                                          |                                                                                                                                                           | Significantly favoured PGB over PLA (MD -16.19, 95% CI, -24.52 to -7.86; P = 0.0002)                                                    | Significantly favoured PGB over PLA (MD -0.37, 95% CI, -0.72 to -0.02; P = 0.036) | Significantly favoured PGB over PLA: LSMD -1.54, 95% CI -2.28 to -0.80, P=0.0001                                                                            |                                                                                                                                                                    |                                                                                                                                                                                        |                                                               |
| Sabatowski 2004   |                                                                                                                                                          |                                                                                                                                                           |                                                                                                                                         |                                                                                   | Significantly favoured PGB over PLA: LSMD -1.11, 95% CI -1.71 to -0.51, P=0.0003 for 150 mg/day; LSMD -1.43, 95% CI -2.04 to -0.82, P=0.0001 for 300 mg/day |                                                                                                                                                                    |                                                                                                                                                                                        |                                                               |
| Satoh 2011        |                                                                                                                                                          |                                                                                                                                                           | Significantly favoured PGB 300 mg/day and 600 mg/day over PLA (P < 0.05)                                                                |                                                                                   | Significantly improved in the 300 and 600 mg/day PGB groups compared with PLA (P < 0.0001 and P = 0.0273 respectively)                                      |                                                                                                                                                                    |                                                                                                                                                                                        |                                                               |
| Shabbir 2011      | Significant improvement in pain of DPN was observed in patients receiving PGB (48.1%) and compared to those receiving PLA (10.5%), P values not reported |                                                                                                                                                           |                                                                                                                                         |                                                                                   |                                                                                                                                                             |                                                                                                                                                                    |                                                                                                                                                                                        |                                                               |
| Siddall 2006      |                                                                                                                                                          |                                                                                                                                                           | Significantly favoured PGB over PLA (MD -17.6, 95% CI, -25.2 to -10.0; P<0.001)                                                         | Significantly favoured PGB over PLA (MD -0.66, 95% CI, -0.99 to -0.32; P<0.001)   |                                                                                                                                                             |                                                                                                                                                                    |                                                                                                                                                                                        |                                                               |
| Simpson 2010      |                                                                                                                                                          |                                                                                                                                                           |                                                                                                                                         |                                                                                   |                                                                                                                                                             |                                                                                                                                                                    | Significant self-reported improvement favouring PGB over PLA: 82.8% vs 66.7% (P= 0.008)                                                                                                |                                                               |
| Simpson 2014      |                                                                                                                                                          |                                                                                                                                                           |                                                                                                                                         |                                                                                   | No significant difference between groups: LSMD 0.04, 95% CI 0.43 to 0.35, P =0.840                                                                          |                                                                                                                                                                    | No significant differences between groups: (P=0.505)                                                                                                                                   | No significant differences between groups (P=0.427)           |
| Stacey 2008       |                                                                                                                                                          | Significant improvement in VAS allodynia scores with PGB compared to PLA (flexible-dose: MD -14.4 mm [P<0 .0001] and fixed-dose, MD -8.98 mm [P =0.0075]) | Significant improvement in with PGB compared to PLA (flexible-dose: MD -16.33 mm [P<0 .0001] and fixed-dose, MD -11.97 mm [P =0 .0008]) |                                                                                   | Significant improvements with flexible- and fixed-dose PGB. Results of between-group differences not reported                                               | Fixed or flexible dose PGB demonstrated significant improvement in VAS anxiety scores over PLA (fixed-dose, 19.95, P = 0.025, and flexible-dose, -17.81; P= 0.024) | Patients treated with any PGB treatment regimen were significantly more likely to rate themselves as minimally, much, or very much improved on the PGIC at end point compared with PLA |                                                               |
| Tolle 2008        |                                                                                                                                                          |                                                                                                                                                           |                                                                                                                                         |                                                                                   |                                                                                                                                                             | Significant improvements in utility scores for 150, 300, 600mg/day respectively compared to PLA, all P ≤ 0.0263                                                    | Significant improvement with 600 mg/day PGB versus PLA in subjects reporting “improved” or “much improved” (50.5% vs 33.3%, P = 0.02)                                                  | Significant superiority of PGB 600 mg/day over PLA (P= 0.009) |
| van Seventer 2006 |                                                                                                                                                          |                                                                                                                                                           |                                                                                                                                         |                                                                                   | Significant improvement in MOS sleep scale problems with PGB compared with PLA MD - 7.54, 95% CI -11.52 to -3.56, P<0.001                                   |                                                                                                                                                                    | Patients in the 150 mg/day (P = 0.02) and 600 mg/day (P = 0.003) groups were more likely to report global improvement than those in the PLA group                                      |                                                               |
| van Seventer 2010 |                                                                                                                                                          |                                                                                                                                                           |                                                                                                                                         |                                                                                   |                                                                                                                                                             |                                                                                                                                                                    | Significant improvement in favour of PGB over PLA (P = 0.006)                                                                                                                          |                                                               |
| Vranken 2008      |                                                                                                                                                          | Significant decrease in with PGB compared with PLA: MD 2.18, 95% CI: 0.57 to 3.80; P = 0.01)                                                              |                                                                                                                                         |                                                                                   |                                                                                                                                                             |                                                                                                                                                                    | Statistically significant improvement for both the EQ-5D utility score (p<0.001) and EQ-5D VAS score with PGB compared to PLA (P<0.001)                                                |                                                               |

ABBREVIATIONS: CGIC: Clinician global impression of change; LSMD: Least square mean difference; MD: Mean difference; MOS-Sleep: Medical Outcomes Study Sleep Scale; NRS: numerical rating scale; PGB: Pregabalin; PGIC: Patient global impression of change; PLA: Placebo; SF-MPQ PPI: Short-Form McGill Pain Questionnaire personal pain intensity; SF-MPQ VAS: Short-Form McGill Pain Questionnaire visual assessment scale; VAS: Visual assessment scale

\*These outcome results have been presented narratively because there was inadequate data to pool results across studies
